# Supplementary material for: Transcription initiation mapping in 31 bovine tissues reveals complex promoter activity, pervasive transcription, and tissue-specific promoter usage
Source: HighWire-hosted journal article supplement (doi:10.1101/gr.267336.120), 2021-03-15
Supplement: Supplemental_Table_S2.xlsx [file Supplemental_Table_S2.xlsx]

## Sheet: RAMPAGE signal in bovine tissue
Supplemental Table S2. Promoter activity atlas. Location, gene assignment, assignment reliability, status by epigenetic signal, status by expression features, and expression (CPM) of each RAMPAGE peak in the dataset. Counts were normalized with respect to the total number of fragments associated to peaks in each sample. Assignment reliability was defined based on the maximum number of reads suppo…
Peak	Chr	Start	End	Strand	Ensembl_gene_ID	Assignment_reliability	Status_by_H3K4me3	Status_by_features	Abomasum/F1	Abomasum/F2	Abomasum/M2	Adipose/F1	Adipose/F2	Adipose/M1	Adipose/M2	Bladder/F1	Bladder/M1	Bladder/M2	BoneMarrow/F1	BoneMarrow/M1	BoneMarrow/M2	BrainCortex/F1	BrainCortex/F2	BrainCortex/M1	BrainCortex/M2	Cecum/F1	Cecum/F2	Cecum/M1	Cecum/M2	Cerebellum/F1	Cerebellum/F2	Cerebellum/M1	Cerebellum/M2	Colon/F2	Colon/M1	Colon/M2	Duodenum/F1	Duodenum/F2	Duodenum/M1	Duodenum/M2	Esophagus/F1	Esophagus/F2	Esophagus/M1	Heart/F1	Heart/F2	Heart/M1	Heart/M2	Hypothalamus/F1	Hypothalamus/F2
Peak_1	1	273247	273261	-			OK	OK	0	0	0	0	0	0	0	0	0	0	0	0	0	0	0	0	0	0	0	0	0	0	0	0	0	0	0	0	0	0	0	0	0	0	0	0	0	0	0	0	0
Peak_2	1	278883	278920	-			OK	OK	0	0	0	0	0	0	0	0	0	0	0	0	0	0	0	0	0	0	0	0	0	0	0	0	0	0	0	0	0	0	0	0	0	0	0	0	0	0	0	0	0
Peak_3	1	620292	620455	-			OK	OK	0	0	0	0.04	0	0	0	0	0	0	0	0	0	0	0	0	0	0	0	0	0	0	0	0	0	0	0	0	0	0	0	0	0	0	0	0.51	0.42	0	0	0	0
Peak_4	1	625864	626097	+	ENSBTAG00000054829	High	OK	OK	0.23	0.22	0.56	0	0.28	0	0	0	0	0	0	0	0	5.06	6.5	3.24	0.91	0.84	0	0	1.32	0	0	0	0.2	0	0.1	0	0	0.12	0	0	0	0	0	0.51	1.68	0	0.38	0	0.27
Peak_5	1	644352	644519	+	ENSBTAG00000054829	High	OK	OK	0	0	0	0	0	0	0	0	0	0	0	0	0	0	0	0	0	0	0	0	0	0	0	0	0	0	0	0	0	0	0	0	0	0	0	0	0	0	0	0	0
Peak_6	1	667200	667215	+			OK	OK	0	0	0	0.04	0	0	0	0	0	0	0	0	0	0	0	0.54	0	0	0	0	0	0	0	0	0	0	0	0	0	0	0	0	0	0	0	0	0	0	0	0	0
Peak_7	1	821234	821281	-	ENSBTAG00000001753	High	OK	OK	25.99	15.95	2.24	0	0	0	0	0	0	0	0	0	0	0	0	0	0	0	0	0.14	0	0	0	0.09	0	0	0.1	0	0	0.12	0	0	0	0	0	0	0	0	0	0	0
Peak_8	1	882072	882292	+	ENSBTAG00000020035	High	OK	OK	0.92	0.99	0.42	1	0.28	1.52	0.8	1.96	1.92	2.08	1.02	0.68	0.49	14.72	5.98	8.64	4.81	0.84	0.5	0.14	0.66	18.72	12.96	8.28	6.7	0	0.1	0.78	0.5	0.6	0	0	2.97	2.22	1.45	3.4	0.84	1.64	1.14	4.6	8.1
Peak_9	1	934473	934494	+			OK	OK	0.46	0	0	0	0	0	0	0.14	0	0.16	0.17	0	0	0	0	0	0	0	0	0	0	0.72	0	0.18	0.2	0	0	0	0	0	0	0	0	0.37	0.29	0.68	0	0	0	0	0
Peak_10	1	945229	945251	-			OK	OK	0	0	0	0	0	0	0	0	0	0	0	0	0	0	0	0	0	0	0	0	0	0	0	0	0	0	0	0	0	0	0	0	0	0	0	0	0	0	0	0	0
Peak_11	1	956213	956225	-			OK	OK	0	0	0	0	0	0	0	0	0	0	0	0	0	0	0	0	0	0	0	0	0	0	0	0	0	0	0	0	0	0	0	0	0	0	0	0.34	0.84	0	0.19	0	0
Peak_12	1	956376	956389	+			OK	OK	0	0	0	0	0	0	0	0	0	0	0	0	0	0	0	0	0	0	0	0	0	0	0	0	0	0	0	0	0	0	0	0	0	0	0	0	0	0	0	0	0
Peak_13	1	965991	966005	-			OK	OK	0	0	0	0	0	0.19	0	0	0	0	0	0	0	0	0	0	0	0	0	0	0	0	0	0	0	0	0	0	0	0	0	0	0.81	0	0	0	0	0	0	0	0
Peak_14	1	976969	977000	+			OK	OK	0	0	0	0	0	0	0	0	0	0	0	0	0	0	0	0	0	0	0	0.14	0.22	0	0	0	0	0	0	0	0	0	0	0	0	0	0	0	0	0	0	0	0
Peak_15	1	978010	978021	+	ENSBTAG00000020035	High	OK	OK	0	0	0	0	0	0	0	0	0	0	0	0	0	0	0	0	0	0	0	0	0	0	0	0	0	0	0	0	0	0	0	0	0	0	0	0	0	0	0	0	0
Peak_16	1	982721	982801	-			OK	OK	0	0	0.42	0	0	0	0	0	0	0	0	0	0	0	0	0	0	0	0	0	0.44	0	0	0	0	0	0	0	0	0	0	0	0	0	0	0	0	0	0	0	0
Peak_17	1	990714	990794	-			OK	OK	0	0	0.14	0.04	0	0	0	0	0	0	0	0	0	0.23	0	0	0.26	0	0	0	0.44	0	0	0	0	0	0	0	0	0.12	0	0	1.89	2.59	0	0	0	0	0.57	0	0
Peak_18	1	990844	991050	+	ENSBTAG00000020035	High	OK	OK	5.29	1.21	11.48	7.84	4.2	12.92	8.32	4.34	2.88	8.64	2.72	33.32	4.41	0.46	1.82	3.78	2.47	5.88	6	4.48	21.56	1.08	0	1.17	0.1	4.05	4.9	3.38	3.4	7.92	1.5	6.29	114.48	30.34	116.58	70.89	168	47.15	62.89	1	2.97
Peak_19	1	995510	995531	+			OK	OK	0	0	0	0	0	0	0	0	0	0	0	0	0	0	0	0	0	0	0	0	0	0	0	0	0	0	0	0	0	0	0	0	0	0	0	0.51	1.68	0	0	0	0
Peak_20	1	1040321	1040331	+	ENSBTAG00000001150	Medium	OK	OK	0.46	0	0.14	0	0	0	0	0	0	0	0	0	0	0	0	0	0	0	0	0	0	0	0	0	0	0	0	0	0	0	0	0	0	0	0	1.36	1.26	0.82	1.71	0	0
Peak_21	1	1040481	1040544	+	ENSBTAG00000001150	High	OK	OK	4.14	1.54	3.22	0	0	0	0	0	0	0	0	0	0	0	0	0	0	0.21	0	0	0.22	0	0	0.09	0.1	0	0.1	0.52	0	0	0	0	1.62	0	0.29	28.9	35.7	23.37	31.92	0	0
Peak_22	1	1100116	1100147	-	ENSBTAG00000013841	High	OK	OK	0	0	0	0	0	0	0	0	0	0	0	0	0	0	0	0	0	0	0	0	0	0	0	0	0	0	0	0	0	0	0	0	0	0	0	0	0	0	0	0	0
Peak_23	1	1118230	1118432	-	ENSBTAG00000011528	High	OK	OK	67.16	38.17	41.44	43.04	32.48	48.07	57.76	47.04	14.4	73.12	35.36	165.92	52.43	75.67	50.44	41.04	30.55	45.15	47.25	12.18	51.92	76.68	121.23	73.8	99	47.25	32.3	45.5	23.7	28.68	7.25	25.16	109.35	88.43	169.94	93.67	162.12	89.79	53.2	25.2	47.52
Peak_24	1	1118488	1118508	+			OK	OK	0	0.11	0	0	0	0	0	0	0	0	0	0	0	0.46	0	0	0	0	0	0	0	0.36	1.08	0.45	0	0	0	0	0.1	0	0	0	0	0	0	0	0	0	0	0	0
Peak_25	1	1120519	1120521	+			OK	OK	0	0	0	0	0	0	0	0	0	0	0	0	0	0	0	0	0	0	0	0	0	0	0	0	0	0	0.1	0	0	0	0	0	0	0	0	4.25	0.84	8.2	3.8	0	0
Peak_26	1	1131748	1131797	-	ENSBTAG00000026260	High	OK	OK	0	0	0	0	0	0	0	0	0	0	0	0	0	0	0	0	0	0	0	0	0	0	0	0	0	0	0	0	0	0	0	0	0	0	0	0	0	0	0	0	0
Peak_27	1	1132148	1132160	+			OK	OK	0	0	0	0	0	0	0	0	0	0	0	0	0	0	0	0	0	0	0	0	0	0	0	0	0	0	0	0	0	0	0	0	0	0	0	0	0	0	0	0	0
Peak_28	1	1132838	1132878	-	ENSBTAG00000026260	High	OK	OK	42.09	122.32	76.16	0	0	0	0	0	0	0	0	0	0	0	0	0	0	0	0	0	0	0	0	0	0	0	0	0	0	0	0	0	0.27	0	0	0.17	0	0.82	1.33	0	0
Peak_29	1	1239434	1239449	+			OK	OK	0	0	0	0	0	0	0	0	0	0	0	0	0	0	0	0	0	0	0	0	0	0	0	0	0	0	0	0	0	0	0	0	0	0	0	0	0	0	0	0	0
Peak_30	1	1356969	1356970	-			OK	OK	0	0	0	0	0	0	0	0	0.32	0	0	0	0	0	0	0	0	0	0	0	0	0	0	0	0	0	0.2	0	0.1	0.12	0	0	0	0	0	0	0	0	0	0	0
Peak_31	1	1377141	1377153	+			OK	OK	0	0	0	0	0	0	0	0	0	0	0	0	0	0	0	0	0	0	0	0	0	0	0	0	0	0	0	0	0	0	0	0	0	0	0	0	0	0	0	0	0
Peak_32	1	1396233	1396246	-	ENSBTAG00000012594	Medium	OK	OK	0	0	0	0	0	0	0	0	0	0	0	0	0	0	0	0	0	0	0	0	0.44	0	0	0	0	0	0	0	0	0	0	0	0	0	0	0	0	0	0	0	0
Peak_33	1	1398626	1398707	+			OK	OK	0	0	0	0	0	0	0	0	0	0	0	0	0	0	0	0	0	0	0	0	0	0	0	0	0	0	0	0	0	0	0	0	0	0	0	0	0	0	0	0	0
Peak_34	1	1398989	1399067	-	ENSBTAG00000012594	Medium	OK	OK	0	0	0	0	0	0	0	0	0	0	0	0	0	0	0	0	0	0	0	0	0	0	0	0	0	0	0	0	0	0	0	0	0	0	0	0	0	0	0.19	0	0
Peak_35	1	1401762	1401783	+			OK	OK	0	0	0	0	0	0	0	0	0	0	0	0	0	0.46	1.3	0.54	0.52	0	0	0	0	0.36	0.81	0.45	0.4	0	0	0	0	0	0	0	0	0	0	0	0	0	0	0.2	0
Peak_36	1	1402325	1402328	-	ENSBTAG00000012594	High	OK	OK	0	0	0	0	0	0	0	0	0	0	0	0	0	0	0	0	0	0	0	0	0	0	0	0	0	0	0	0	0	0	0	0	0	0	0	0	0	0	0	0	0
Peak_37	1	1405946	1405975	-	ENSBTAG00000012594	High	OK	OK	0	0	0	0	0	0	0	0	0	0	0	0	0	0	0	0	0	0	0	0	0	0	0	0	0	0	0	0	0	0	0	0	0	0	0	0	0	0	0	0	0
Peak_38	1	1414666	1414785	-			OK	OK	0	0	0.14	0.16	0	0	0	0	3.2	0	0.17	0	0	0	0	0	0	0	0	0.14	0	0	0	0.09	0	0	0.2	0.26	0.7	0.36	0.75	0	0	0	0	1.36	0	0	0.19	0	0
Peak_39	1	1416060	1416073	-			OK	OK	0	0	0	0	0	0	0	0	0	0	0	0	0	0	0	0	0	0	0	0.14	0	0	0	0	0	0	0.1	0	0	0	0	0	0	0	0	0	0	0	0	0	0
Peak_40	1	1423087	1423103	-			OK	OK	0	0.11	0.14	0.04	0	0	0	0	0	0	0	0	0	0.23	0	0	0	0	0	0	0	0	0	0	0.5	0	0.3	0	0.3	0.12	0	0	0	0	0	0.51	0	0	0	1.2	0.27
Peak_41	1	1424005	1424027	-			OK	OK	0	0.22	0	0	0	0	0	0	0	0	0	0	0	0	0	0	0.26	0	0	0	0.44	0	0	0	0.2	0	0.1	0	0	0	0.5	0	0	0	0	0.17	0	0	0	0	0
Peak_42	1	1428399	1428411	-			OK	OK	0.46	0	0.14	0	0	0	0	0	0	0	0	0	0	0	0	0	0	0	0	0	0	0.36	0	0	0.3	0	0	0	0.1	0	0	0	0	0	0	0	0	0	0	0	0
Peak_43	1	1429718	1429727	-			OK	OK	0	0	0	0.16	0	0	0	0.42	0	0	0	0	0	0	0.78	0	0.13	0	0	0	0.22	0	0	0	0	0	0	0	0.2	0	0	2.22	0	0	0	0	0	0	0	0.2	0
Peak_44	1	1432218	1432228	-			OK	OK	0	0	0.14	0	0	0	0.16	0.42	0	0	0.17	0	0	0	0	0	0	0	0.25	0	0	0	0	0	0	0	0.1	0	0	0	0	0	0	0	0	0	0	0	0	0	0
Peak_45	1	1439696	1439699	-			OK	OK	0	0	0	0	0	0	0	0	0	0	1.02	0.68	0.49	0	0	0	0	0	0	0	0	0	0	0.09	0.5	0	0	0	0	0	0	0	0.54	0	0.29	0.34	0	0.82	1.14	0.6	0
Peak_46	1	1455113	1455229	-	ENSBTAG00000012594	High	OK	OK	57.04	30.03	25.9	75.04	24.64	81.51	334.08	63	14.4	63.52	201.62	523.6	241.57	91.31	81.38	83.16	59.15	67.2	60.75	20.58	82.06	131.4	103.95	101.34	107.6	66.15	39.1	89.96	34.1	45.72	8.5	22.94	90.18	88.06	158.05	408.34	538.02	258.71	297.73	31.6	55.62
Peak_47	1	1455523	1455578	-	ENSBTAG00000012594	High	OK	OK	0	0	0.14	0.04	0	0.19	1.44	0	0.64	0	0.68	0.68	1.96	2.99	2.08	10.26	4.55	0	0	0	0.88	2.52	2.43	1.53	2.1	0	0.5	0	0.2	0.12	0	0.74	0	0	1.45	0.17	0	2.05	0.95	0	0
Peak_48	1	1467411	1467602	-	ENSBTAG00000012594	High	OK	OK	0	0	0	0	0	0	0	0	0	0	0	0	0	0	0	0	0.13	3.78	12.75	0.56	29.7	0	0	0	0	4.5	2	12.74	13.1	1.44	2.25	8.88	0	0	0	0	0	0	0	0	0
Peak_49	1	1580605	1580648	-			OK	OK	0	0	0	0	0	0	0	0	0	0	0	0	0	0	0	0	0	0	0	0	0	0	0	0	0	0	0	0	0	0	0	0	0	0	0	0	0	0	0	0	0
Peak_50	1	1587824	1587839	-			OK	OK	0	0	0	0	0	0	0	0	0	0	0	0	0	0	0	0	0	0	0	0	0	0	0	0	0	0	0.1	0	0	0	0	0	0	0	0	0	0	0	0	0	0
Peak_51	1	1608226	1608241	-			OK	OK	0	0	0	0	0	0	0.16	0	0	0	0	0	0	0	0	0	0.13	0	0	0	0	0	0	0	0	0	0.1	0	0	0	0	0	0	0	0	0	0	0	0	0	0
Peak_52	1	1643535	1643553	-			OK	OK	0	0	0	0	0	0	0	0	0	0	0	0	0	0.69	0.26	0	0.13	0	0	0	0	1.08	1.62	0.81	0.3	0	0	0	0	0	0	0	0	0	0	0	0	0	0	0	0
Peak_53	1	1643607	1643717	+	ENSBTAG00000018278	High	OK	OK	506.46	159.17	255.92	237.32	94.64	325.85	183.52	278.46	37.76	183.84	103.87	467.16	214.13	303.14	241.8	277.02	140.14	259.98	259.5	60.2	355.52	355.68	409.05	392.22	571.9	209.7	162.6	299.78	303.8	144.48	36.25	159.47	545.13	271.58	437.32	1819.34	2295.72	2120.52	821.37	114.4	122.04
Peak_54	1	1645066	1645081	+	ENSBTAG00000018278	Medium	OK	OK	0.23	0.11	0	0.08	0.28	0	0	0	0	0.48	0.17	0	0	0	0	0	0.13	0	0	0	0	0.36	0	0.36	0.1	0	0	0	0	0	0	0	0	0	0	0.51	0	0.82	0	0.2	0
Peak_55	1	1664303	1664316	-			OK	OK	0	0	0.28	0	0	0	0	0	0	0	0.17	0	0	0.69	1.04	2.7	1.82	0	0	0	0	1.08	0	0.27	0.3	0	0	0	0	0	0	0	0	0	0	0.17	0	0	0	0.4	0
Peak_56	1	1726124	1726163	-	ENSBTAG00000021997	High	OK	OK	0	0	0	2.08	1.12	2.85	7.68	0.14	0	0.16	2.21	1.36	0.98	0.69	0.78	1.08	0.26	0	0	0	0	0	0	0.18	0.1	0	0.3	0.26	0	0.24	0	0	0	0	0	0.17	0	0	0	0.2	1.35
Peak_57	1	1728077	1728095	-	ENSBTAG00000021997	High	OK	OK	0	0	0	0.6	1.12	1.9	1.92	0.28	0	0	0	0	0	0	0	0	0	0	0	0	0	0	0	0	0	0.45	0.1	0.26	0	0	0	0	0	0	0	0	0	0	0	0	0
Peak_58	1	1730427	1730428	-			OK	OK	0	0	0	0.04	0	0	0	0	0	0	0	0	0	0	0	0	0	0	0	0	0	2.16	0	0.36	0.2	0	0	0	0	0	0	0	0	0	0	0	0	0	1.14	0	0
Peak_59	1	1733460	1733461	-			OK	OK	0	0	0	0.12	2.52	0.19	0	0	0	0	0	0	0	0	0	0	0	0	0	0	0.22	0.36	0	0	0	0	0	0	0	0	0	0	0	0.37	0	0	0	2.05	0	0.4	0
Peak_60	1	1735359	1735373	-			OK	OK	0.23	0	0	0	0	0	0	0	0.32	0	0	0	0	0	0	0	0	0	0	0	0	0	0	0	0.1	0	0.3	0	0	0.12	0	0	0	0	0	0	0	0	0	0	0
Peak_61	1	1740585	1740607	-			OK	OK	0	0.11	0	0.36	0	0.19	0.16	0	0	0.32	2.89	1.36	0	0.23	0	1.08	0.13	0	0	0	0	0	0	0.27	0.1	0	0.1	0	0.2	0	0	0	0.27	0	0.29	0	0	0.41	0.57	0.2	0
Peak_62	1	1781271	1781310	-	ENSBTAG00000021997	High	OK	OK	0	0	0	0.6	0	0	1.28	0	0	0	3.74	6.8	1.96	0	0	0	0	0	0	0	0	0	0	0	0	0	0.2	0	0	0	0	0	0	0	0	0	0	0	0	1	0
Peak_63	1	1796380	1796396	-	ENSBTAG00000021997	High	OK	OK	0.46	0	1.4	0.36	5.04	0	0	1.26	3.52	1.6	1.53	1.36	0	0	0	1.62	0.91	0	1	0.14	0.22	0	0	0.18	0.1	0	0.7	0	0.3	0	0	0	0.27	0.74	0	0.51	0	0.41	0	0	0
Peak_64	1	1797975	1797992	-	ENSBTAG00000021997	High	OK	OK	0.46	0.22	0.14	0.52	1.68	0.38	0	1.54	0	0.16	0.34	0	0	0	0	0	0.39	0	0.25	0.7	0	0.36	0	0.09	0	0	0.3	1.04	0	0.24	0.25	0	0	1.48	0.58	0.68	0	0.41	0.38	0	1.08
Peak_65	1	1883425	1883446	-			OK	OK	0	0	0.14	0.08	0	1.14	0	0	0	0	0.34	0	0.98	0	0	0	0.13	0	0	0	0	0	0	0.27	0	0	0	0.26	0	0	0	0	0	0	0	0	0	0	0.76	0	0
Peak_66	1	1900031	1900046	-			OK	OK	0	0	0	0	0	0	0	0.14	0	0.32	1.36	0	0	0	0	0	0	0	0	0	0	0	0.27	0	0.1	0	0	0.26	0	0	0	0	0	0	0	0	0	0	0	0	0.27
Peak_67	1	1904653	1904665	-			OK	OK	0	0	0.42	0	0	0	0	0	0.64	0	0	0	0	0	0	0	0	0	0	0	0	0	0	0	0	0	0.4	0	0	0	0	0	0	0	0	0	0	0	0	0	0
Peak_68	1	1907822	1907912	-	ENSBTAG00000021997	High	OK	OK	0	0	0	1.2	1.12	0.19	0.64	0.7	0	0.32	1.36	0	1.96	1.15	0	0.54	0.26	0	0	0.28	0	0.36	0	0.27	0.1	0	0.3	0	0	0	0	0	0.27	0	0	0	0	0	0.57	0	0
Peak_69	1	1908612	1908802	-	ENSBTAG00000021997	High	OK	OK	15.64	12.98	14.14	24.12	9.24	50.73	37.12	30.94	7.68	35.36	81.43	44.2	27.93	29.67	14.3	34.56	15.86	5.25	12.25	4.2	14.08	60.12	55.62	28.44	49.7	6.3	6.8	5.46	7.4	8.04	4.25	5.18	18.9	27.01	11.02	3.4	10.92	11.07	2.85	18.6	20.25
Peak_70	1	1909039	1909099	+	ENSBTAG00000008490	High	OK	OK	0	0	0	0.04	0	0.19	0.16	0.14	0	0	0	0	0	0	0	0.54	0	0	0	0	0	0	0	0.18	0.1	0	0	0	0	0	0	0	0	0	0	0	0	0	0	0	0
Peak_71	1	1909544	1909610	+	ENSBTAG00000008490	High	OK	OK	20.01	10.12	14.28	12.36	6.16	16.15	20.48	17.22	4.48	14.72	13.09	14.96	22.05	12.42	8.32	12.42	9.1	16.17	17.25	7.42	12.98	30.24	28.62	30.87	35.9	13.95	15.7	29.64	9.9	10.08	3.5	9.62	13.5	9.99	10.15	4.08	10.5	20.5	2.85	7.8	10.53
Peak_72	1	1914023	1914033	+			OK	OK	0	0	0	0	0	0	0	0	0	0	0	0	0	0	0	0	0	0	0	0	0.66	0	0	0	0	0	0.2	0	0.2	0	0.75	0	0	0	0	0	0	0	0	0	0
Peak_73	1	1939070	1939094	+			OK	OK	0	0	0	0	0	0	0	0.14	0	0	0	0	1.47	0	0	0	0	0	0.25	0.14	0	0	0	0	0	0	0.2	0	0	0	0	0	0	0	0	0	2.52	0	0	0	0
Peak_74	1	1943747	1943819	-	ENSBTAG00000021997	Low	OK	OK	0.92	0.22	0.56	1.24	0	1.52	0.64	2.38	0	1.12	1.7	2.72	5.88	2.99	0.78	0.54	0.78	1.47	2	0.42	1.32	5.76	2.97	7.83	4.8	0	0.8	1.82	1.7	0.72	0.5	0.37	0.81	0.37	0.87	2.04	1.68	2.46	3.8	1.6	1.89
Peak_75	1	1966591	1966593	-			OK	OK	0	0.11	0.14	0	0	0	0	0	0	0	0	0	0	0	0	0	0.13	0	0	0.14	0	1.08	0	0	0	0	0	0	0.2	0	0	0.74	0	0	0	0	0	0	0.38	0	0
Peak_76	1	1967346	1967347	-			OK	OK	0	0	0	0	0	0	0	0	0	0	0	0	0	0	0	0	0	0	0	0	0.44	0.36	0	0.18	0	0	0	0.26	0	0	0	0	0	0	0	0.17	0	0	0.38	0	0
Peak_77	1	1968267	1968270	-			OK	OK	0	0	0	0.08	0	0	0	0	0	0	0.17	0	0	0	0	0	0.13	0.42	0	0	0.44	1.08	0	0.36	0.5	0	0.3	0.26	0	0	0	0	0	0	0	0	0	0	0	0.6	0
Peak_78	1	1969300	1969343	-			OK	OK	0	0	0.28	0.2	0	0	0.16	0.42	0.32	0.8	0.68	0	0.49	0	0.52	1.62	0	0	0.5	0	0.22	0	0	0.09	0	4.95	0.3	1.3	0	0	0	0	0.81	2.22	0	0.51	2.1	0.41	0.57	0.6	4.32
Peak_79	1	1974345	1974499	-	ENSBTAG00000008482	High	Low_H3K4me3	OK	0.69	4.84	4.2	2.36	3.92	0.19	4.32	4.06	6.08	2.24	1.53	0.68	1.96	0.69	0.26	1.62	4.68	3.57	3	2.38	5.5	2.16	4.32	3.15	5.1	3.6	7.5	11.96	0.4	2.88	5	1.85	1.62	4.44	1.74	5.1	0	2.87	9.5	1.4	2.7
Peak_80	1	1977116	1977387	-	ENSBTAG00000008482	High	Low_H3K4me3	OK	0	1.65	4.62	1.44	2.24	0.95	1.12	3.5	3.2	1.92	0.68	2.72	2.45	2.07	2.08	0	1.17	2.52	3.5	4.48	3.08	3.24	1.62	1.98	3.3	1.8	10.5	4.42	2.6	1.92	3.25	1.11	1.08	5.55	1.16	1.36	0.42	1.23	3.61	1.2	0.81
Peak_81	1	1978668	1978673	-	ENSBTAG00000008482	High	OK	OK	0	0	0	0.04	0.56	0	0	0.42	0	0	0	0	0	0	0	0	0.26	0	0	0.14	0	0	0	0.36	0	0	0.1	0.52	0	0	0	0	0	0	0.29	0	0	0	0	0.2	0
Peak_82	1	1984815	1984846	-	ENSBTAG00000008482	High	OK	OK	1.38	0.66	1.26	0.88	0.56	0.57	0.96	0.7	0.96	0	0.51	0	2.94	3.91	3.38	2.7	4.03	0.42	0	0.56	0.66	1.8	0.54	2.16	1.5	0	0.4	1.3	0.7	0.48	0.75	0	0	0	0.58	0.17	0	0.41	1.14	3.2	2.7
Peak_83	1	1985060	1985135	-	ENSBTAG00000008482	High	OK	OK	792.81	718.08	476.98	505.64	236.32	635.55	831.04	559.58	336.96	545.76	643.28	1069.64	665.42	633.42	566.54	692.28	390.13	461.37	978.25	228.34	410.96	949.32	1108.62	918.18	698.1	1357.65	818.6	1236.56	294.2	460.08	244.5	315.61	427.41	631.96	408.61	413.78	832.86	719.55	476.71	494	645.57
Peak_84	1	1985238	1985347	+	ENSBTAG00000009188	High	OK	OK	0.23	1.1	0.98	3.12	2.52	7.03	6.56	0.84	1.92	0.64	1.87	3.4	2.45	6.44	7.54	4.86	1.82	1.68	0	0.28	1.32	11.16	12.69	18.18	8.1	0	0.3	2.86	2.8	0.6	0.25	0.74	0.54	2.22	0.29	2.38	0	1.23	2.28	2.6	2.7
Peak_85	1	1985921	1985972	-	ENSBTAG00000008482	Low	OK	OK	0	0	0.14	0.2	0	0	0.16	0	0	0	0.17	0	0	0	0	0	0.13	0	0	0	0	0.72	0	1.62	2.9	0	0.3	0	0	0	0	0	0	0	0	0.51	1.26	0	0.38	0	0
Peak_86	1	1986031	1986122	+	ENSBTAG00000009188	High	OK	OK	14.72	12.98	8.68	16	9.52	23.18	16.96	15.54	4.16	9.28	18.53	44.2	23.52	15.64	14.04	22.68	9.1	11.76	14.75	9.8	21.78	37.08	27.54	36.45	40.9	20.7	21.2	32.5	17.2	15.48	7.25	9.99	14.04	18.13	9.57	17	15.12	14.35	17.1	7.4	12.96
Peak_87	1	1998454	1998463	+			OK	OK	0	0	0	0	0	0	0	0	0	0	0.17	0	0	0	0	0	0	0	0.25	0.14	0	0	0	0	0	0.9	0	0	0	0	0.75	0	0	0	0	0	0	0	0.19	0	0
Peak_88	1	2027481	2027522	-	ENSBTAG00000008482	Low	OK	OK	0.46	1.43	1.68	1.32	0.84	3.23	1.6	0.98	0.32	0.32	0.51	2.72	1.96	4.83	2.6	2.7	1.82	0.63	0.75	0.56	0.44	3.24	5.67	4.68	4.7	1.8	0.7	1.04	0.5	1.08	0.75	0.37	1.08	0.37	1.45	4.25	7.98	2.05	3.42	2.2	3.78
Peak_89	1	2027565	2027670	+	ENSBTAG00000009187	High	OK	OK	1.61	5.83	1.96	3.72	0.56	4.18	10.08	3.22	0.96	1.28	3.23	3.4	1.96	7.36	5.46	12.96	6.37	3.36	4.75	2.24	3.74	12.24	10.53	9.45	13.6	5.85	1.6	4.94	3.3	3.12	0.5	2.22	3.51	6.29	6.96	15.13	21	11.48	8.55	3.4	8.91
Peak_90	1	2027818	2027995	+	ENSBTAG00000009187	High	OK	OK	0	0.22	0.28	0.24	0.84	0	0	0.56	0	0.64	0.17	0	0	0.23	1.3	1.62	0.52	0.21	0.75	0.14	0.22	0	0.81	0.72	0.5	0.9	0.2	0	0	0.12	0	0.37	0	0	0	0.17	0	0	0.95	0	0.27
Peak_91	1	2027855	2027890	-			OK	OK	0	0	0	0.08	0	0	0.16	0	0	0	0.34	0	0	0.69	0	0	0	0.42	0	0	0	0	1.08	0	0.4	0	0	0	0	0	0.25	0	0	0	0	0.51	0	0	0	0	0
Peak_92	1	2046649	2046758	+	ENSBTAG00000001258	High	OK	OK	139.38	85.8	42.42	26.32	8.12	40.47	62.56	47.32	18.24	38.4	29.41	53.72	36.75	36.11	34.32	82.08	49.14	44.52	42.75	10.78	49.94	57.6	52.38	38.34	52.2	72	30.2	73.58	33.1	21.84	6	27.38	50.49	22.94	11.89	28.22	34.86	33.21	18.24	24.2	31.05
Peak_93	1	2047944	2048022	-			OK	OK	0	0.88	0	1.08	0	1.9	2.88	0.28	0.64	0.48	0.85	1.36	1.47	1.84	0	1.08	0.65	3.99	6.25	1.12	3.74	0.72	6.48	1.35	2.4	7.65	1.1	1.56	2.4	0.36	0	1.48	0	1.85	0	0.34	0	0	0	0.4	0
Peak_94	1	2050141	2050158	+	ENSBTAG00000001258	Medium	OK	OK	0	0.11	0	0.12	0	0	0.16	0.56	0	1.12	0	0	0	0	0	0	0	0.21	0	0	0.22	0	0	0	0	0	0.1	0	0	0	0	0	0	0	0	0	0	0	0	0	0
Peak_95	1	2059107	2059114	+			OK	OK	0	0.55	0.14	0	0	0	0	0.56	0	0.64	0	0	0	0	0	0	0	0	0	0	0	0	0	0	0	0	0	2.08	0	0	0	0	0	0	0	0	0	0	0	0	0
Peak_96	1	2065662	2065675	+			OK	OK	0	0	0	0	0	0	0	0	0	0	0	0	0	0	0	0	0	0	0	0	0	0	0	0	0	0	0	0	0	0	0	0	0	0	0	0	0	0.41	0	0	0
Peak_97	1	2081243	2081244	-			OK	OK	0	0	0	0	0	0.76	0	0	0	0.16	0	0.68	0	0	0	0	0	0	0	0	0.22	0	0	0.09	0	0	0	0	0	0	0	0	0	0.74	0	0	0	0	0.19	0	0
Peak_98	1	2098929	2098942	-			OK	OK	0	0	0.42	0.44	0	0.19	0	0.14	0	0	1.36	0	0	0.92	0.26	0	0	0	0	0.14	0.44	0	0	0.09	0.5	0	0.2	0.52	0	0	0	0	0	0	0	0.17	0	1.23	0	0.2	0
Peak_99	1	2099153	2099166	-	ENSBTAG00000012899	High	Low_H3K4me3	OK	0.46	0	0	0.08	0	0	0.16	0.28	0.32	0	0	0	0	0	0	0	0.13	0	0.25	0	0	0	0	0.18	0.2	0.45	0.1	0	0	0.12	0.25	0	0	0	0.29	0.17	0	0	0.19	0	0
Peak_100	1	2128743	2128886	+			OK	OK	0	0	0.28	0.12	0	0	0.8	0	0	0	0	0	0	0	0	0	0	0.21	0.25	0	0.22	0.36	0	0	0.1	0	0	0	0.9	0.12	0	0	0.27	0	0	0.17	0.42	0.41	0.38	0	0.27
Peak_101	1	2129677	2129738	+			OK	OK	0	0.11	0.14	0.52	0.56	0.19	0.16	0	0	0.32	1.36	0	1.47	0.69	0	0.54	0.13	0	0	0.14	0.44	0.36	0	0	0	0.45	0	0.52	0.4	0.48	0.25	0	0	0	0	0.34	0	0	0.38	0	0
Peak_102	1	2130497	2130556	+			OK	OK	0.23	0.11	0	0.56	0	1.52	0.64	0.98	0.64	0.64	0.34	2.04	1.47	0.23	2.08	0	0	0	0.5	0.14	0.44	0	0	0.18	0.4	0	0.7	1.04	0.2	0	0	0	0.27	2.22	0	0.17	0	0	0	0.2	0
Peak_103	1	2135443	2135472	+			OK	OK	0	0	0	0	0	0	0.16	0	0	0	0	0	0	0	0	0	0	0	0	0	0	0	0	0	0	1.35	0	1.04	0.5	0.36	0	0	0	0	0	0	0	0	0	0	0
Peak_104	1	2156302	2156305	-			OK	OK	0	0	0	0	0	0	0	0	0	0	0	0	0	0	0	0	0	0	0	0	0	0	0	0	0	0	0	0	0	0	0	0	0	0	0	0	0	0	0	0	0
Peak_105	1	2165011	2165045	-			OK	OK	0	0	0	0	0	0	0.64	0	0	0	0	0	0	0	0	0	0	0	0	0	0	0	0	0	0	0	0	0	0	0	0	0	0	0	0	0	0	0	0	0	0
Peak_106	1	2170153	2170155	-			OK	OK	0	0	0	0	0	0	0	0	0	0	0	0	0	0	0	0	0	0	0	0	0	0	0	0	0	0	0	0	0	0	0	0	0	0	0	0	0	0	0	0	0
Peak_107	1	2170958	2171043	-			OK	OK	0	0	0.28	0.04	0	0	0.16	0	0	0	0	0	0	0	0	0	0	0.21	0	0.14	0.88	0	0	0	0	0	1.2	1.3	0.1	0.12	0	0	0	0	0	0	0	0	0	0	0
Peak_108	1	2172965	2172998	+			OK	OK	0	0	0	0	0	0	0.16	0	0	0	0	0	0	0	0	0	0	0	0	0	0	0	0	0	0	0	0.2	1.56	0.1	0	0	0	0	0	0	0	0	0	0	0	0
Peak_109	1	2173919	2173923	-			OK	OK	0	0	0	0.04	0	0.19	0	0	0	0	0	0	0	0	0	0	0.13	0	0.75	0	0	0	0	0	0.1	0	0.4	0	0.2	0	0	0	0	0	0	0	0	0	0	0.4	0
Peak_110	1	2188659	2188676	-			OK	OK	0	0	0	0	0	0	0	0	0	0	0.68	0	0	0.23	0	0	0.26	0	0	0.42	0	0	0	0	0.2	0	0.2	0	0.3	0	0	0	0.27	0	0	0	0	0	0	0	0
Peak_111	1	2189643	2189696	-			OK	OK	0	0.11	0	0.12	0	0.95	0	0	0	0	0.68	0	0.49	0	1.04	0	0.13	0	0	0.42	0.44	0	0.81	0.18	0.1	0	0.5	0.52	0	0	0.25	0	0	0	0	0	0	0	0	0	0
Peak_112	1	2217596	2217685	+			OK	OK	0.23	0	0.7	0.52	0	0.76	1.92	0.14	0	0.64	0.68	0	2.45	0.69	0	0.54	0.39	0.21	1.5	0.28	1.1	0	0.54	0.27	0.9	0.9	0.1	0	0.2	0.36	0.25	0.37	0.81	0	1.45	0.17	0	0.41	0.19	0.2	0
Peak_113	1	2218225	2218399	-	ENSBTAG00000021819	High	OK	OK	12.19	8.91	15.54	24	8.4	42.37	40.64	20.3	7.36	18.08	34.68	50.32	28.42	29.9	23.4	30.78	20.02	11.13	22.25	13.72	40.92	57.96	62.64	45.9	54.9	36.9	19.4	43.68	24.7	11.64	8.5	27.01	35.1	25.53	17.69	6.8	10.5	15.99	9.88	7.2	32.13
Peak_114	1	2218709	2218781	+			OK	OK	0	0.11	0.14	0.12	0	0	0.16	0.14	0	0	0	0	1.47	0	0	1.08	0.13	0	0	0	0.22	0.36	0	0	0	0	0.1	0.26	0.4	0	0	0.74	0	0	0	0	0	0	0	0.4	1.62
Peak_115	1	2242419	2242432	-			OK	OK	0	0	0	0	0	0	0	0	0	0	0	0	0	0	0	0	0	0	0	0	0	0	0	0	0	0	0	0	0	0	0	0	0	0	0	0	0	0	0	0	0
Peak_116	1	2265432	2265438	+			OK	OK	0	0	0	0	0	0	0.16	0	0	0	0	0	0	0	0	0	0	0	0	0.14	0	0	0	0	0	0	0.1	0	0	0	0	0	0	0	0	0	0	0	0	0	0
Peak_117	1	2265984	2265999	-			OK	OK	0	0	0	0.04	0	0	0	0	0	0	0.34	0	0	0	0	0	0	0	0	0	0	0	0	0	0	0	0.1	0	0	0	0.25	0	0	0	0	0	0	0	0	0	0
Peak_118	1	2271049	2271084	-			OK	OK	0	0	0	0	0	0	0	0	0	0	0	0	0	0	0	0	0	0	0	0	0	0	0	0	0	0	0.3	0.26	0	0	0	0	0	0	0	0	0	0	0	0	0
Peak_119	1	2287694	2287707	-			OK	OK	0	0	0.14	0	0	0	0	0	0	0	0.17	0	0	0	0	0.54	0	0	0	0.14	0	0	0	0	0.1	0.9	0.2	0.26	0	0	0	0	0	0	0	0	0	0	0	0	0
Peak_120	1	2288537	2288544	-			OK	OK	0	0	0	0	0	0	0	0.14	0	0.64	0	0	0.49	0	0	0	0	0	0	0	0.22	0	0	0	0.1	0	0	0.26	0	0	0	0	0	0	0	0	0	0	0	0	0
Peak_121	1	2314007	2314162	-	ENSBTAG00000019404	High	OK	OK	11.27	8.25	14.14	15.88	7.56	24.13	10.56	6.16	2.88	9.12	18.36	34	25.97	4.83	5.72	3.78	1.82	30.03	27.5	10.92	29.26	5.04	7.83	9.9	7.2	40.95	32.5	38.74	15	10.08	8.5	16.65	16.2	5.18	1.16	8.84	8.4	11.07	9.5	5.6	9.18
Peak_122	1	2315298	2315312	-			OK	OK	0	0	0	0	0	0.19	0	0	0	0	0	0	0	0	0	0	0	0	0	0	0	0	0	0	0	0	0	0	0.1	0	0	0	0	0	0.29	0	0	0	0	0	0
Peak_123	1	2316031	2316043	-	ENSBTAG00000015212	High	OK	OK	0	0	0.7	0.04	0	0.95	0.8	0	0	0	0.34	0	0	0.23	0	0	0.13	0	0	0.14	0.66	0.36	0	0.18	0.4	0	0.2	0.78	0	0	0	0	0	5.92	0	0	0	0	0.76	0	0
Peak_124	1	2316256	2316281	-	ENSBTAG00000015212	High	OK	OK	0.23	0.11	0	0.04	0	0	0	0.14	0	0.32	0	1.36	0	0.23	0	0	0.65	0	0.75	0	0	1.08	0	0.36	0.2	0	0.2	0	0.4	0	0.25	0	0.27	1.11	0	0	0	0	0	0.6	0
Peak_125	1	2322155	2322175	-			OK	OK	0	0	0.84	0	0	0	0	0	0	0	0	0	0	0	0	0	0	0	0	0	0	0	0	0	0	0	0	0	0	0	0	0	0	0	0	0	0	0	0	0	0
Peak_126	1	2350007	2350181	-	ENSBTAG00000015212	High	OK	OK	5.52	5.5	5.18	25.76	4.76	44.65	38.08	9.66	3.52	16.96	15.3	27.88	23.52	16.33	16.9	11.88	7.02	21.84	18	6.44	22.66	37.44	31.05	45.99	36	18.45	18.6	27.56	16.8	9	7	4.81	14.31	13.32	12.18	11.73	15.12	12.71	11.4	3	14.58
Peak_127	1	2370556	2370571	+			OK	OK	0	0	0	0.04	0	0	0	0	0	0	0	0	0.49	0	0	0	0	0.21	0	0	0	0	0	0	0	0	0.1	0.26	0	0	0	0	0	0	0	0	0	0	0	0	0
Peak_128	1	2381018	2381053	-	ENSBTAG00000015212	High	OK	OK	0	0.11	0	0.2	0	0	0.16	0	0	0	0	0	0	0.46	0	0	0	0	0	0.14	0	0	1.08	0	0.2	0.45	0	0	0.2	0	0	0	0	0	0	0	0	0	0	0	0.27
Peak_129	1	2499965	2499984	-	ENSBTAG00000037547	High	OK	OK	0	0	0	0	0	0	0	0	0	0	0	0	0	21.16	8.58	7.56	1.56	0	0	0	0	2.88	8.91	8.64	6	0	0	0	0	0	0	0	0	0	0	0	0	0	0	6.4	6.75
Peak_130	1	2509671	2509686	-	ENSBTAG00000054023	Medium	OK	OK	0	0	0	0	0	0	0	0	0	0	0	0	0.49	0	0	0	0	0	1.5	0.14	0	0	0	0	0	1.35	0.1	0.52	0	0.36	0.25	1.11	0	0	0	0	0	0	0	0	0
Peak_131	1	2549126	2549198	-	ENSBTAG00000049136	High	OK	OK	0	0	0	0	0	0	0	0	0	0	0	0	0	7.36	7.54	3.24	3.38	0	0	0	0	3.24	1.62	3.33	5.6	0	0	0	0	0	0	0	0	0	0	0	0	0	0	2.8	5.94
Peak_132	1	2562938	2562949	-	ENSBTAG00000008482	High	OK	OK	0	0	0	0	0	0	0	0	0	0	0	0	0	0	0	0	0	0	0	0	0	0	0	0	0	0	0	0	0	0	0	0	0	21.09	0	0	0	0	0	0	0
Peak_133	1	2615874	2615996	-			OK	OK	0	0	0	0	0	0	0	0	0	0	0	0	0	0	0	0	0	0	0	0	0	0	0	0	0	0	0	0	0	0	0	0	0	0	0	0	0	0	0	0	0
Peak_134	1	2615940	2615992	+			OK	OK	0	0	0	0	0	0	0	0	0	0	0	0	0	0	0	0	0	0	0	0	0	0	0	0	0	0	0	0	0	0	0	0	0	0	0	0	0	0	0	0	0
Peak_135	1	2749405	2749448	+	ENSBTAG00000043993	High	Low_H3K4me3	OK	0	0	0	0.12	0	0	0	0.42	0	0	0	0.68	0	1.38	1.04	2.16	0	0.42	0	0	0.22	9.72	1.89	1.98	1.5	0	0.3	1.04	0.2	0	0	0	1.89	0	0	0	0	0	0	1	0
Peak_136	1	2786602	2786690	+	ENSBTAG00000003064	High	OK	OK	0.23	1.76	1.54	3.28	1.12	1.33	2.24	3.92	1.6	4.16	8.84	4.08	13.23	3.45	1.82	3.24	0.78	1.26	2.5	3.36	5.28	3.96	1.62	2.79	2.4	4.5	4.1	5.46	1.4	1.92	0.5	1.48	0.81	1.11	0.87	0.85	3.78	0.82	2.47	4.4	3.51
Peak_137	1	2786987	2787005	+	ENSBTAG00000003064	High	OK	OK	0	0.33	0	0.04	0	0	0	0.56	0	0.32	0	0	0	0	0	0	0	0	0	0	0	0.72	0	0.45	1.4	0	0	0.26	0.1	0	0	0	0	0	0	0.17	0	0	0	0	0
Peak_138	1	2793382	2793383	+	ENSBTAG00000003064	High	OK	OK	0.23	0.11	0	0.24	1.12	0	0.16	0	0	0.8	0	0	0	0	0	0	0.13	0	0	0.56	0.22	0	0	0.18	0	0	0.4	0.26	0.2	0	0	0	0	0	0	0.17	0	0	0	0.4	0
Peak_139	1	2818225	2818287	+	ENSBTAG00000003064	Medium	OK	OK	0	0	0.28	0	0	0	0.64	0.42	1.92	0	0	0	0	0	0.26	1.08	0.13	0.63	0.75	0	0	0.36	0.54	0.27	0.7	0	0.5	0	0.1	0.36	0.5	0	0	0	0	0	0	0.41	0	0.2	0
Peak_140	1	2827590	2827735	-			OK	OK	0.23	0.11	0.56	0.04	0	0	0.16	0.28	0	0	0	0.68	0	1.15	1.04	1.08	0.78	0.21	0	0	0	0.72	1.62	1.53	2.9	0.9	0	0.26	0.3	0	0	0	0	0	0	0	0	0	0.38	0.6	1.08
Peak_141	1	2827793	2828182	+	ENSBTAG00000003063	High	OK	OK	27.83	16.06	11.2	7.84	4.76	16.34	6.4	7	2.56	11.04	15.13	22.44	12.25	72.68	37.7	98.82	31.59	15.33	25.25	15.12	21.78	79.2	48.06	110.07	72.8	31.5	18.7	32.24	11.7	8.16	5.25	8.14	7.83	5.55	6.96	4.59	12.6	12.71	8.93	32.4	25.11
Peak_142	1	2828848	2828958	+	ENSBTAG00000003063	High	OK	OK	10.35	6.6	3.78	0.44	0.56	1.33	0.8	0.98	0	1.12	2.21	4.76	1.47	2.3	1.3	1.08	1.04	3.99	10.25	5.32	17.16	8.28	8.64	15.48	8.1	25.65	8.2	18.98	4.2	7.56	2	2.96	0.54	0	0	0.17	0	0.82	0.19	0.2	0.27
Peak_143	1	2846691	2846721	+	ENSBTAG00000003063	High	OK	OK	0	0.22	0	0.12	0	0	0	0	0	0	0	1.36	0	0	0	0	0	0	0	0.28	0	0	0	0	0	0	0.6	1.04	1.1	0.6	0	0	0	0	0	0	0	0	0	0	0
Peak_144	1	2856743	2856751	+			OK	OK	0	0	0	0.28	0	0	0	0.7	0	0.48	0.34	0	0	0	0	0.54	0	0	1	0.28	0	1.08	0	1.17	0	0.9	0	0.78	0	0	0	0	0	0	0	0	1.68	0	0	0	0
Peak_145	1	2879104	2879123	+			OK	OK	0	0	0.42	0	0	0	0	0	0	0	0	0	0	0	0	0	0	0	0	0	0	0	0	0	0	0	0.2	0.52	0	0	0	0	0	0	0	0	0	0	0	0	0
Peak_146	1	2879872	2879880	+			OK	OK	0.23	0	0	0	0	0	0	0.28	0	0	0	0	1.47	0	0	0	0	0	0	0.14	0.44	0	0	0	0	0	0.4	0	0	0.12	0.75	0	0	0	0	0	0	0	0	0	0
Peak_147	1	2895884	2895896	+	ENSBTAG00000003063	Medium	Low_H3K4me3	OK	0	0	0	0.04	0	0	0.16	0	0	0	0	0	0	0.23	0.26	4.32	1.04	0	0	0.42	0.22	0	0	0.09	0.5	0	0.1	0	0	0	0	0	0	0	0	0	0	0	0	0.2	0.54
Peak_148	1	2896632	2896764	+	ENSBTAG00000003063	High	OK	OK	0.46	0.11	0	0	0	0	0	0	0	0	0	0	0	0	0	0	0	0	0	0.7	0	0	0	0	0	0	0.9	0.26	0	0.48	0.5	0	0	0	0	0	0	0	0	0	0
Peak_149	1	2897198	2897268	+			OK	OK	1.15	0.33	0.56	0.12	0	0	0	0	0.32	0	0.34	0	0	0	0	0	0.26	0	0	2.1	0.22	0	0.54	0.36	0.1	0	3.8	0.26	0.1	0.12	0.5	0	0	0.74	0.29	0	0	0	0.19	0	0
Peak_150	1	2897890	2897914	+			OK	OK	0.92	0.22	0.28	0	0	0.19	0.16	0.14	0.96	0.32	0.51	2.04	0	0.46	1.3	2.7	0	0	0	0.14	0	0.72	0	0.72	0.4	1.35	1.2	9.1	0	0	0	0	0	0	0	0.85	0	0	1.52	0	0
Peak_151	1	2898047	2898063	-			OK	OK	0	0	0	0	0	0	0	0	0	0	0	0	0	0	0	0	0	0.21	0	0	0.22	0	0	0	0	0	0.3	0.78	0	0	0.25	0	0	0	0	0	0	0	0	0	0
Peak_152	1	2903305	2903321	+	ENSBTAG00000003063	Medium	OK	OK	0.46	0.11	0.14	0.04	0	0	0	0.14	0	0	0	0	0	0	0	0.54	0	0	1	0.42	0	0	0	0.18	0.6	0.9	0	0	0	0	0	0	0	0	0	0	0	0.82	0.38	0	0
Peak_153	1	2907038	2907053	+			OK	OK	0.23	0.11	0	0	0	0	0.48	0.56	0	0.48	0.17	0	0	0.69	0.52	0	0	0	0.5	0.14	0.22	1.44	0.54	0.63	0.1	1.35	0	1.56	0	0	0	0	0	0	0	0	0	0	0	0.2	0
Peak_154	1	2916078	2916141	+	ENSBTAG00000003063	High	OK	OK	0	0	1.12	0.04	0	0	0	0.7	0	0	0	0	0	0.69	0.26	0	0.78	0	1.25	0	0	0	0	0.09	0	2.25	1.4	0	0	0.48	0	0	0	0	0	0	0	0	0	0	0
Peak_155	1	2916950	2916965	+			OK	OK	0.23	0.11	0.14	0	0	0	0	0	0	0	0	0	0	0	0	0	0.78	0	0	0.28	0	0	0	0.36	0.1	0	0.1	0	0.4	0	0	0	0	0	0	0	0	0	0	0	0
Peak_156	1	2917557	2917560	+			OK	OK	0.46	0.11	0.14	0	0	0	0	0.42	0	0	0	0	0	0.23	2.6	1.08	1.04	0	0.25	0	0	0.36	0	0.63	1.2	0	0	0	0.1	0	0	0	0	0	0	0	0	0.41	0.38	0.6	0
Peak_157	1	2918120	2918129	+			OK	OK	0.23	0	0	0.08	0	0	0	0	0	0	0	0	0	0	0	0	0	1.05	0.25	0.56	0	0	0	0	2	0	0	0	0.2	0	0	0	0	0	0	0	0	0	0.19	0	0
Peak_158	1	2923941	2924223	+	ENSBTAG00000003059	High	OK	OK	7.59	8.14	11.48	11.2	7.84	13.49	20.8	12.18	4.16	13.44	12.41	7.48	11.27	23	12.48	19.44	6.11	1.68	12.75	7.56	10.78	18.72	13.5	20.79	13.9	18	8.5	16.9	7.5	11.52	5.5	3.33	8.1	9.62	10.73	3.57	1.26	4.51	3.23	2.8	7.29
Peak_159	1	2924100	2924148	-			OK	OK	0	0	0	0.2	0	0.38	0.16	0	0	0	0	2.04	0	0.23	0.52	0.54	0.26	0	0	0	0	2.16	1.08	2.16	1.4	0	0.2	0.78	0	0.12	0	0	0	0	0	0.68	1.26	1.23	1.33	0.4	0
Peak_160	1	2924701	2924863	+	ENSBTAG00000003059	High	OK	OK	7.82	2.53	5.46	9.12	1.4	14.25	7.52	17.08	3.2	13.12	12.41	26.52	16.17	25.99	13.78	18.36	13.39	9.66	5.75	5.46	9.02	20.52	15.39	15.39	17	18	13	9.1	4.5	4.8	2.25	5.55	12.69	6.29	9.57	8.67	15.54	9.02	8.17	13.4	20.25
Peak_161	1	3079232	3079250	+			OK	OK	0	0	0	0	0	0	0	0	0	0	0	0	0	0	0	0	0.65	0	0	0	0	0	0	0.18	0	0	0	0	0	0	0	0	0	0	0	0	0	0	0	0	3.78
Peak_162	1	3080534	3080622	-	ENSBTAG00000017310	High	OK	OK	2.07	1.43	2.24	2.76	1.68	2.09	3.2	0.42	0.96	0.48	4.93	0	0.49	3.68	0.26	0	0.65	1.26	1	0.14	1.1	2.88	1.35	1.53	0.7	1.35	0	0.78	0.5	1.2	1	2.22	2.16	0	0	1.87	0.84	0.82	0.76	3.2	4.59
Peak_163	1	3080832	3080860	-	ENSBTAG00000017310	Low	OK	OK	0.69	0	0.14	0.04	0	0	0.32	0	0	0	0	0.68	0	0.23	0	0	0.26	0	0	0	0	0	0	0	0	0	0	0.26	0.3	0	0	0.74	0.27	0	0	0	0	0	0	0	0
Peak_164	1	3081628	3081639	-	ENSBTAG00000017310	Low	OK	OK	0	0.22	0.28	0	0	0	0.16	0	0	0	0.34	0	0	0.23	0	0.54	0.26	0.21	0	0	0.44	0	0	0.27	0.1	0	0.1	0	0.1	0.24	0	0	0.27	0	0	0	0	0	0	0	0.54
Peak_165	1	3081897	3081912	-	ENSBTAG00000017310	Medium	OK	OK	0	0	0.14	0.16	0	0	0.16	0	0.64	0	0	0	0	0	0.26	0.54	0	0	0	0	0.22	0	0	0	0.1	0	0	0.26	0.1	0	0	0.37	0.81	0	0	0.17	0	0	0.19	0	0
Peak_165	1	3081897	3081912	-	ENSBTAG00000015212	Low	OK	OK	0	0	0.14	0.16	0	0	0.16	0	0.64	0	0	0	0	0	0.26	0.54	0	0	0	0	0.22	0	0	0	0.1	0	0	0.26	0.1	0	0	0.37	0.81	0	0	0.17	0	0	0.19	0	0
Peak_166	1	3102938	3103128	-			OK	OK	1.84	1.43	0.7	0.92	0	0.57	1.28	0.84	0.64	0.8	0.34	0	0.98	0.23	1.82	2.7	0.39	1.05	0.5	0.56	1.1	5.4	1.89	2.52	2.7	0	0.8	0.78	0.7	0.48	0	0.37	0.27	0	0.29	1.02	1.68	0.41	1.14	2.4	1.08
Peak_167	1	3103137	3103234	+	ENSBTAG00000012412	High	OK	OK	2.53	1.76	0.98	1.88	0.28	4.56	3.84	6.44	2.24	3.2	6.12	3.4	3.43	2.76	0.26	2.16	0.65	4.62	2.75	3.92	5.94	1.44	2.97	4.5	2.8	5.85	4.2	3.38	2.6	1.56	0.75	0.37	1.89	1.85	1.74	3.23	4.62	2.05	0.76	3.4	2.7
Peak_168	1	3150647	3150657	+	ENSBTAG00000012412	Medium	OK	OK	0	0	0	0.04	0	0	0.32	0	0	0	0	0	0	0	0	0	0	0	0	0	0	0	0	0	0.1	0	0	0	0	0	0	0	0	0	0	0.34	0.42	0	0.38	0	0
Peak_169	1	3157841	3157856	+			OK	OK	0	0	0	0.12	0	0	0.16	0	0	0.32	0.34	0	0	0.23	0	0.54	0	0	0	0	0	0	0	0.18	0	0	0	0	0	0	0.25	0	0.54	0	0	0	0	0	0.76	0	0
Peak_170	1	3187724	3187761	-	ENSBTAG00000023718	High	OK	OK	0	0	0	0	0	0	0	0	0	0	0	0	0	0	0	0	0	0	0	0	0	0	0	0	0	0	0	0	0	0	0	0	0	0	0	0	0	0	0	0	0
Peak_171	1	3197373	3197395	-	ENSBTAG00000023718	High	OK	OK	0	0	0	0	0	0	0	0	0	0	0	0	0	0.69	0	0	0.13	0	0	0	0	0	0	0.18	0	0	0	0	0	0	0	0	0	0	0	0	0	0	0	0	0
Peak_172	1	3210604	3210675	+	ENSBTAG00000016619	High	OK	OK	4.14	0.33	0.84	0.76	0	0.57	0.16	0.14	0	0.16	0.17	0.68	0.98	3.22	0.78	1.08	0.91	1.05	1.75	0.56	1.98	1.08	1.08	0.36	1.1	1.8	2.9	2.34	2.2	1.68	0.25	4.07	2.97	0	0.58	0.17	0	0.41	0.57	0	0
Peak_173	1	3463345	3463392	-			OK	OK	0	0	0	0	0	0	0	0	0	0	0	0	0	0	0	0	0	0	0	0	0	0	0	0	0	0	0	0	0	0	0	0	0	0	0	0	0	0	0	0	0
Peak_174	1	3503345	3503357	-			OK	OK	0	0	0	0.32	1.12	0	0	0	0	0	0	0	0.49	0.46	1.3	0.54	0.91	0	1.5	0	0	0	0.81	0.09	0.4	0	0.1	0.26	0	0	0	0	1.35	0	0	0	0	0	0.38	0	1.35
Peak_175	1	3510975	3510983	-	ENSBTAG00000020762	High	OK	OK	0	0	0	0	0	0	0	0	0	0	0	0	0	0	0	0	0	0	0	0	0	0	0	0.09	0	0	0	0	0	0	0	0	0	0	0	0	0	0	0	0	0
Peak_176	1	3520493	3520546	-	ENSBTAG00000020762	High	OK	OK	0.69	1.98	1.82	0	0	0	0	0	0	0	0	0	0	0	0	0	0.13	0.63	1	0	0.88	0	0	0	0	2.25	0.4	3.12	0.4	0.96	0	0	0	0	0	0	0	0	0	0	0
Peak_177	1	3529470	3529492	-	ENSBTAG00000020762	High	OK	OK	0	0	0	0	0	0	0	0	0	0	0	0	0	0	0	0	0	0	0	0	0	0	0	0	0	0	0	0	0	0	0	0	0	0	0	0	0	0	0	0	0
Peak_178	1	3529585	3529678	+			OK	OK	0	0	0	0	0	0	0	0	0	0	0	0	0	0	0	0	0	0	0	0	0	0	0	0	0.2	0	0	0	0	0	0	0	0	0	0	0	0	0	0	0	0
Peak_179	1	3760182	3760295	-			OK	OK	1.84	0.33	0.28	0.2	0	0	0.64	0	0	0	0	0.68	0	0.92	1.3	0	0.78	0	0	0.56	0	2.88	10.8	3.6	2.7	0	0.3	0	0	0	0	0	0	0	0	0	0	0	0.38	0.4	0
Peak_180	1	3760470	3760670	+	ENSBTAG00000018855	High	OK	OK	6.67	4.62	7.84	9.72	3.36	10.83	11.2	16.24	7.04	15.52	16.66	34.68	10.29	27.83	6.76	15.66	7.41	9.66	12.75	6.3	17.6	16.92	10.26	30.51	14.8	16.2	8.1	22.62	4.1	8.04	1.75	3.7	13.23	5.92	10.44	10.2	7.56	10.25	8.74	6	4.32
Peak_181	1	3807620	3807656	+			OK	OK	0	0	0.14	0	0	0	0	0	0	0	0	2.72	0	0	0	0	0.65	0.21	0	0	0	0.72	0.81	0	0.2	0	0	0	0	0	0	0	0	0	0	0	0	0	0.76	0	0
Peak_182	1	3814112	3814113	+			OK	OK	0.23	0	0	0	0	0.95	0	0	0	0	0.34	0	0	0	0	0	0	0	0	0	0	0	0	0.27	0	0	0	0	0	0	0	0	0	0	0	0	0	0.41	0	0	0
Peak_183	1	3821379	3821510	+	ENSBTAG00000018855	High	Low_H3K4me3	OK	0.92	0.55	1.12	0.56	2.8	0	0.16	1.26	0.64	1.28	0.51	1.36	0	0.23	1.3	0.54	1.56	2.1	1.25	1.12	1.32	1.08	0.54	0.45	1.3	2.25	2.1	1.82	0.1	0.72	1	1.11	0.54	1.48	0.87	1.7	0.42	2.05	1.71	0.6	2.16
Peak_184	1	3833271	3833358	-	ENSBTAG00000018854	High	OK	OK	73.6	50.16	28.56	81.36	38.92	113.24	79.52	52.92	8.96	61.6	32.13	127.84	50.96	223.1	136.24	104.22	72.28	51.24	44.5	9.52	49.72	56.16	86.4	129.24	58.3	35.1	19.5	38.22	56	36.72	4.5	19.24	61.83	36.63	63.22	67.15	85.68	65.6	41.8	40.8	37.8
Peak_185	1	3833462	3833607	+			OK	OK	0.23	0.33	0.56	0.04	0	0	0	0	0	0	0	0	0	2.07	2.86	0	1.56	0	1	0	0	0.72	2.97	2.52	1	1.35	0	1.04	0.2	0.96	0	0	0.27	0	0	0	0	0	0	0.2	0
Peak_186	1	3966923	3967021	+	ENSBTAG00000051337	High	OK	OK	1.15	0.66	0.98	0.08	0	0.57	1.92	0	0	0	0.51	0	0.49	3.22	1.82	7.56	2.21	1.47	0.25	1.26	2.42	36.72	20.52	32.31	23.8	1.35	1.2	3.38	1.5	3	0.5	0.74	2.43	0.37	0	0	0	0	0	0.8	0.54
Peak_186	1	3966923	3967021	+	ENSBTAG00000017839	High	OK	OK	1.15	0.66	0.98	0.08	0	0.57	1.92	0	0	0	0.51	0	0.49	3.22	1.82	7.56	2.21	1.47	0.25	1.26	2.42	36.72	20.52	32.31	23.8	1.35	1.2	3.38	1.5	3	0.5	0.74	2.43	0.37	0	0	0	0	0	0.8	0.54
Peak_187	1	3968596	3968609	-			OK	OK	0	0	1.26	0	0	0	0	0	0	0	0	0	0	0	0	0	0	0	0	0.14	0	0	0	0	0.3	0	0.2	0	0	1.2	0	0	0	0	0	0	0	0	0	0	0
Peak_188	1	3998869	3998884	+	ENSBTAG00000017839	Low	OK	OK	0	0	0	0	0	0	0	0	0	0.16	0.34	0	0	0	0	0	0	0	0	0	0	0	0	0	0.2	0	0	0	0	0.12	0	0	0	0	0	0	0	0	0	0	0
Peak_188	1	3998869	3998884	+	ENSBTAG00000051337	High	OK	OK	0	0	0	0	0	0	0	0	0	0.16	0.34	0	0	0	0	0	0	0	0	0	0	0	0	0	0.2	0	0	0	0	0.12	0	0	0	0	0	0	0	0	0	0	0
Peak_189	1	4024913	4024967	+	ENSBTAG00000051337	Medium	OK	OK	0	0	0	0	0	0	0	0	0	0	0	0	0	0	0	0	0	0	0	0	0	0	0	0	0	0	0	0	0	0	0	0	0	0	0	0	0	0	0	0	0
Peak_189	1	4024913	4024967	+	ENSBTAG00000017839	Low	OK	OK	0	0	0	0	0	0	0	0	0	0	0	0	0	0	0	0	0	0	0	0	0	0	0	0	0	0	0	0	0	0	0	0	0	0	0	0	0	0	0	0	0
Peak_190	1	4151824	4151847	+			OK	OK	0	0	0	0	0	0	0	0	0	0	0	0	0	0	0	0	0	0	0	0	0	0	0	0	0	0	0	0	0	0	0	0	0	0	0	0	0	0	0	0	0
Peak_191	1	4192132	4192259	+	ENSBTAG00000017839	High	OK	OK	0.23	0.22	0.14	3.2	0.56	4.75	4.64	0.98	0	0.48	0.68	1.36	3.43	1.84	0.26	2.7	0.39	0	0	0.14	0.88	39.6	28.89	54.9	38.3	0	0	0.52	0.2	0.12	0	0	6.21	7.77	0.58	0	0	0	0.38	0	0
Peak_192	1	4270956	4271044	+	ENSBTAG00000017839	High	OK	OK	0	0	0	0	0	0	0	0	0	0	0	0	0	0	0	0	0.26	0	0	0	0	3.6	0.81	5.58	4	0	0	0	0	0	0	0	0	0	0	0	0	0	0	0	0
Peak_193	1	4271598	4271698	+	ENSBTAG00000017839	High	OK	OK	0	0	0	0	0	0	0	0	0	0	0	0	0	0.46	0	0	0	0	0	0	0	4.32	6.48	5.04	2.8	0	0	0	0	0	0	0	0	0	0	0	0	0	0	0	0
Peak_194	1	4272377	4272415	+	ENSBTAG00000017839	High	Low_H3K4me3	OK	0	0.22	0	0.08	0	0	0.16	0	0	0	0	0	0	1.84	0.78	5.4	2.86	0	0	0	0	8.64	9.45	3.51	6.5	0	0.1	0	0	0	0	0	0	0	0	0.17	0	0.82	0	0	0
Peak_195	1	4306861	4306883	+			OK	OK	0	0	0	0	0	0	0	0	0	0	0	0	0	0	0	0	0	0	0	0	0	2.88	0	0.9	0.4	0	0	0	0	0	0	0	0	0	0	0	0	0	0	0	0
Peak_196	1	4351902	4351921	+	ENSBTAG00000048631	Medium	OK	OK	0	0	0.14	0	0	0	0	0	0	0	0	0	0	0	0	0	0	0	0	0	0	0	0	0	0	0	0.1	0.26	0	0	0.25	0	0	0	0	0	0	0	0	0	0
Peak_196	1	4351902	4351921	+	ENSBTAG00000017839	High	OK	OK	0	0	0.14	0	0	0	0	0	0	0	0	0	0	0	0	0	0	0	0	0	0	0	0	0	0	0	0.1	0.26	0	0	0.25	0	0	0	0	0	0	0	0	0	0
Peak_197	1	4357741	4357830	+	ENSBTAG00000017839	High	OK	OK	0	0	0.14	0.16	0	0	0	0.14	0	0	0	0	0	0.23	0.26	1.62	0.39	0.21	0.25	0.14	0	0	1.08	0.18	0.6	0.45	0.5	1.04	0	0	0	0	0	0.74	0	0	0	0	0	0	0
Peak_197	1	4357741	4357830	+	ENSBTAG00000048631	High	OK	OK	0	0	0.14	0.16	0	0	0	0.14	0	0	0	0	0	0.23	0.26	1.62	0.39	0.21	0.25	0.14	0	0	1.08	0.18	0.6	0.45	0.5	1.04	0	0	0	0	0	0.74	0	0	0	0	0	0	0
Peak_198	1	4380965	4381187	+	ENSBTAG00000048631	High	OK	OK	0	0	0	0.04	0	0	0	0	0	0	0	0	0	15.18	15.6	5.94	5.85	0	0	0	0.44	27.36	22.41	17.46	24.1	0	0.2	0	0	0	0	0	0	0.74	0	0	0	0	0	0.6	1.08
Peak_199	1	4384208	4384218	+			OK	OK	0	0	0	0	0	0	0	0	0	0	0.17	0	0	0	0	0	0	0	0.5	0	0	0	0.54	0.09	0.5	0	0	0	0	0	0	0	0	0	0	0	0	0	0.19	0	0
Peak_200	1	4429405	4429479	+	ENSBTAG00000048631	High	OK	OK	0	0.11	0	0.12	1.68	0	0	0	0.32	0	0	0	0	0.46	0	0.54	0.52	0.21	0	0.14	0	0.36	2.43	1.71	1	0	0.5	0	0	0.12	0.25	0	0	0	0	0	0	0	0.57	0	0
Peak_201	1	4430518	4430526	+	ENSBTAG00000048631	High	Low_H3K4me3	OK	0	0	0.14	0	0	0	0	0	0	0	0	0	0	0.69	0	0	0.13	0	0.25	0	0	1.08	1.89	0.36	2	0	0	0	0	0	0	0	0	0	0	0	0	0	0	0.6	0
Peak_202	1	4430777	4430814	+	ENSBTAG00000048631	High	Low_H3K4me3	OK	0	0	0	0	0	0.19	0	0	0	0	0	0	0	0	0	0.54	0	0.21	0	0	0	5.4	2.43	1.17	15.4	0	0.1	0	0	0	0	0	0.27	0	0	0	0	0	0	0.2	0
Peak_203	1	4673596	4673622	+	ENSBTAG00000034869	High	OK	OK	0	0	0	0	0	0	0	0	0	0	0	0	0	0	0	0	0	0	0	0	0	0	0	0	0	0	0	0.26	0	0	0	0	0	0	0	0	0	0	0	0	0
Peak_204	1	4736824	4736830	+	ENSBTAG00000046804	High	OK	OK	0	0	0	0	0	0	0	0	0	0	0	0	0	0	0	0	0	0	0	0	0	0	0	0	0	0	0	0	0	0	0	0	0	0	0	0	0	0	0	0	0
Peak_205	1	4759916	4759945	+	ENSBTAG00000015812	High	OK	OK	0	0	0	0.04	0	0	0	0	0	0	0	0	0	0	0	0	0	0	0	0	0	0	0	0	0	0	0	0	0	0	0	0	0	0	0	0	0	0	0	0	0
Peak_206	1	4770023	4770037	+	ENSBTAG00000048503	High	OK	OK	0	0	0	0	0	0	0	0	0	0	0	0	0	0	0	0	0	0	0	0	0	0	0	0	0	0	0	0	0	0	0	0	0	0	0	0	0	0	0	0	0
Peak_207	1	4777019	4777062	+			OK	OK	0	0	0	0	0	0	0	0	0	0	0	0	0	0	0	0	0	0	0	0	0	0	0	0	0	0	0	0	0	0	0	0	0	0	0	0	0	0	0	0	0
Peak_208	1	4845631	4845653	-	ENSBTAG00000050662	High	OK	OK	0	0	0	0	0	0	0	0	0	0	0	0	0	0	0	0	0	0	0	0	0	0	0	0	0	0	0	0	0	0	0	0	0	0	0	0	0	0	0	0	0
Peak_209	1	4857175	4857201	+	ENSBTAG00000054173	High	OK	OK	0	0	0	0	0	0	0	0	0	0	0	0	0	0	0	0	0	0	0	0	0	0	0	0	0.1	0	0	0	0	0	0	0	0	0	0	0	0	0	0	0	0
Peak_210	1	4868467	4868479	-	ENSBTAG00000049506	High	OK	OK	0	0	0	0	0	0	0	0	0	0	0	0	0	0	0	0	0	0	0	0	0	0	0	0	0	0	0	0	0	0	0	0	0	0	0	0	0	0	0	0	0
Peak_211	1	4878252	4878272	+	ENSBTAG00000049468	Low	OK	OK	0	0	0	0	0	0	0	0	0	0	0	0	0	0	0	0	0	0	0	0	0	0	0	0	0	0	0	0	0	0	0	0	0	0	0	0	0	0	0	0	0
Peak_212	1	4902204	4902227	-	ENSBTAG00000049506	Low	OK	OK	0	0	0	0	0	0	0	0	0	0	0	0	0	0	0	0	0	0	0	0	0	0	0	0	0	0	0	0	0	0	0	0	0	0	0	0	0	0	0	0	0
Peak_213	1	4913750	4913762	+	ENSBTAG00000049468	High	OK	OK	0	0	0	0	0	0	0	0	0	0	0	0	0	0	0	0	0	0	0	0	0	0	0	0	0	0	0	0	0	0	0	0	0	0	0	0	0	0	0	0	0
Peak_214	1	4926082	4926092	-	ENSBTAG00000052340	High	OK	OK	0	0	0	0	0	0	0	0	0	0	0	0	0	0	0	0	0	0	0	0	0	0	0	0	0	0	0	0	0	0	0	0	0	0	0	0	0	0	0	0	0
Peak_215	1	4946574	4946585	+			OK	OK	0	0	0	0	0	0	0	0	0	0	0	0	0	0	0	0	0	0	0	0	0	0	0	0	0	0	0	0	0	0	0	0	0	0	0	0	0	0	0	0	0
Peak_216	1	4957891	4957906	-	ENSBTAG00000044154	High	OK	OK	0	0	0	0	0	0	0	0	0	0	0	0	0	0	0	0	0	0	0	0	0	0	0	0	0	0	0	0	0	0	0	0	0	0	0	0	0	0	0	0	0
Peak_217	1	5140290	5140311	+			OK	OK	0	0	0	0	0	0	0	0	0	0	0	0	0	0	0	0	0	0	0	0	0	0	0	0	0	0	0	0	0	0	0	0	0	0	0	0	0	0	0	0	0
Peak_218	1	5148192	5148213	+			OK	OK	0	0	0	0	0	0	0	0	0	0	0	0	0	0	0	0	0	0	0	0	0	0	0	0	0	0	0	0	0	0	0	0	0	0	0	0	0	0	0	0	0
Peak_219	1	5173916	5173935	-	ENSBTAG00000052530	High	OK	OK	0	0	0	0	0	0	0	0	0	0	0	0	0	0	0	0	0	0	0	0	0	0	0	0	0	0	0	0	0	0	0	0	0	0	0	0	0	0	0	0	0
Peak_220	1	5184109	5184151	-	ENSBTAG00000052530	Medium	OK	OK	0	0	0	0	0	0	0	0	0	0	0	0	0	0	0	0	0	0	0	0	0.22	0	0	0	0	0	0	0	0	0	0	0	0	0	0	0	0	0	0	0	0
Peak_221	1	5195353	5195378	-	ENSBTAG00000051544	High	OK	OK	0	0	0	0	0	0	0	0	0	0	0	0	0	0	0	0	0	0	0	0	0	0	0	0	0	0	0	0	0	0	0	0	0	0	0	0	0	0	0	0	0
Peak_222	1	5337365	5337374	+			OK	OK	0	0	0	0	0	0	0	0	0	0	0	0	0	0	0	0	0	0	0	0	0	0	0	0	0	0	0	0	0	0	0	0	0	0	0	0	0	0	0	0	0
Peak_223	1	5350672	5350680	+			OK	OK	0	0	0	0	0	0	0	0	0	0	0	0	0	0	0	0	0	0	0	0	0	0	0	0	0	0	0	0	0	0	0	0	0	0	0	0	0	0	0	0	0
Peak_224	1	5417842	5417847	+			OK	OK	0	0	0	0	0	0	0	0	0	0	0	0	0	0	0	0	0	0	0	0	0	0	0	0	0	0	0	0	0	0	0	0	0	0	0	0	0	0	0	0	0
Peak_225	1	5422454	5422459	+			OK	OK	0	0	0	0	0	0	0	0	0	0	0	0	0	0	0	0	0	0	0	0	0	0	0	0	0	0	0	0	0	0	0	0	0	0	0	0	0	0	0	0	0
Peak_226	1	5448205	5448209	+	ENSBTAG00000053953	High	OK	OK	0	0	0	0	0	0	0	0	0	0	0	0	0	0	0	0	0	0	0	0	0	0	0	0	0	0	0	0	0	0	0	0	0	0	0	0	0	0	0	0	0
Peak_227	1	5457653	5457658	+			OK	OK	0	0	0	0	0	0	0	0	0	0	0	0	0	0	0	0	0	0	0	0	0	0	0	0	0	0	0	0	0	0	0	0	0	0	0	0	0	0	0	0	0
Peak_228	1	5463375	5463385	+			OK	OK	0	0	0	0	0	0	0	0	0	0	0	0	0	0	0	0	0	0	0	0	0	0	0	0	0	0	0	0	0	0	0	0	0	0	0	0	0	0	0	0	0
Peak_229	1	5479140	5479152	-			OK	OK	0	0	0	0	0	0	0	0	0	0	0	0	0	0	0	0	0	0	0	0	0	0	0	0	0	0	0	0	0	0	0	0	0	0	0	0	0	0	0	0	0
Peak_230	1	5490675	5490689	-	ENSBTAG00000054015	Medium	OK	OK	0	0	0	0	0	0	0	0	0	0	0	0	0	0	0	0	0	0	0	0.98	0	0	0	0	0	0	0.5	0	0	0	0.25	0	0	0	0	0	0	0.82	0	0	0
Peak_231	1	5506988	5506993	-	ENSBTAG00000052457	High	OK	OK	0	0	0	0	0	0	0	0	0	0	0	0	0	0	0	0	0	0	0	0	0	0	0	0	0	0	0	0	0	0	0	0	0	0	0	0	0	0	0	0	0
Peak_232	1	5510143	5510157	+	ENSBTAG00000039602	High	OK	OK	0	0	0	0	0	0	0	0	0	0	0	0	0	0	0	0	0	0	0	0	0	0	0	0	0	0	0	0	0	0	0	0	0	0	0	0	0	0	0	0	0
Peak_233	1	5627719	5627729	+	ENSBTAG00000052202	High	OK	OK	0	0	0	0	0	0	0	0	0	0	0	0	0	0	0	0	0	0	0	0	0	0	0	0	0	0	0	0	0	0	0	0	0	0	0	0	0	0	0	0	0
Peak_234	1	5652999	5653023	+			OK	OK	0	0	0	0.04	0	0	0	0	0	0	0	0	0	0	0	0	0	0	0	0	0	0	0	0	0	0	0	0	0	0	0	0	0	0	0	0	0	0	0	0	0
Peak_235	1	5689899	5689913	+	ENSBTAG00000046384	High	OK	OK	0	0	0	0	0	0	0	0	0	0	0	0	0	0	0	0	0	0	0	0	0	0	0	0	0	0	0	0	0	0	0	0	0	0	0	0	0	0	0	0	0
Peak_236	1	5770094	5770268	+	ENSBTAG00000039820	High	OK	OK	0	0	0	0	0	0	0.16	0	0	0	0	0	0	0	0	0	0	0	0	0	0.88	0	0	0	0	3.15	1.3	6.5	0	0	0	0	0	0	0	0	0	0	0	0	0
Peak_237	1	5829920	5829952	+	ENSBTAG00000039255	High	OK	OK	0	0	0	0	0	0	0	0	0	0	0	0	0	0	0	0	0	0	0	0	0	0	0	0	0	0	0	0	0	0	0	0	7.29	3.7	0	0	0	0	0	0	0
Peak_238	1	6042690	6042915	+			OK	OK	555.22	718.19	862.4	1358.08	2205.56	1904.75	589.6	608.3	1773.12	754.4	2397.17	589.56	1780.17	759.92	2049.84	1801.98	1568.32	1368.99	1223.75	2052.12	1343.1	214.56	621	336.69	450	914.4	1113	607.62	828.2	951	2143	1105.56	389.88	640.1	1291.08	405.62	143.22	386.63	416.1	2908.2	2606.58
Peak_239	1	6043130	6043133	-			OK	OK	0	0	0	0	0	0.38	0.48	1.82	0	1.6	0	0.68	0	0	0	0	0	0	0	0	0	0	0	0	0.1	0	0	0	0	0	0	4.81	0	0	0	0.17	0	0	0	0	0
Peak_240	1	6111845	6111872	+	ENSBTAG00000034854	Medium	OK	Likely_false	0	0	0	0	0	0	0	0	0	0	0	0	0	3.91	4.42	4.86	1.82	0	0	0	0	5.76	1.89	1.98	0.8	0	0	0	0	0	0	0	0	0	0	0	0	0	0	0.2	1.08
Peak_241	1	6112067	6112158	+	ENSBTAG00000034854	High	OK	OK	0	0	0	0	0	0	0	0	0	0	0	0	0	8.74	7.28	39.96	17.03	0	0	0	0	12.24	9.72	3.69	8.4	0	0	0	0	0	0	0	0	0	0	0	0	0	0	1.2	2.16
Peak_242	1	6404540	6404556	-			OK	OK	0	0	0	0	0	0	0	0	0	0	0	0	0	0	0	0	0	0	0	0	0	0	0	0	0	0	0	0	0	0	0	0	0	0	0	0	0	0	0	0	0
Peak_243	1	6404614	6404637	+	ENSBTAG00000034854	High	OK	Likely_false	0	0	0	0	0	0	0	0	0	0	0	0	0	0	0	0	0	0	0	0	0	0	0	0	0	0	0	0	0	0	0	0	0	0	0	0	0	0	0	0	0
Peak_244	1	6794151	6794152	-			OK	OK	0	0	0	0	0	0	0	0	0	0	0	0	0	0	1.56	2.16	0.13	0	0	0	0	0	0	0	0.1	0	0	0	0	0	0	0	0	0	0	0	0	0	0	0	0
Peak_245	1	6827068	6827081	-	ENSBTAG00000004139	Medium	OK	OK	0	0	0	0.04	0	0	0	0.14	0	0	0	0	0.49	0	0	0	0	0	0	0	0	0	0	0	0	0	0	0	0	0	0	0	0	0.37	0	0.34	0	0	0.19	0	0
Peak_246	1	6840602	6840613	-			OK	OK	0	0	0	0	1.12	0	0.16	0	0	0	0	0	0	0	0	0	0	0	0	0	0	0	0	0	0	0	0.1	0	0	0	0	0	0	0	0	0.51	0	0	0.38	0	0
Peak_247	1	6844441	6844454	-			OK	OK	0.23	0	0	0	0	0	0	0	0	0	0.17	0	0	0	0	0	0	0	0	0	0	0.72	0	0	0.1	0	0.1	0.52	0	0	0.25	0	0	0	0	0.34	0	0.41	0	0	0
Peak_248	1	6844974	6844983	-			OK	OK	0	0	0	0	0	0	0	0	0	0	0.17	0	0	0	0	0	0	0	0.75	0	0	0	0	0	0.1	0	0.1	1.04	0	0	0	0	0	0	0	1.36	0	0.41	0.38	0	0
Peak_249	1	6855511	6855525	-			OK	OK	0	0	0	0	0	0	0	0	1.6	0	0	0	0	0	0	0	0	0	0	0	0	0	0	0	0	0	0.4	0	0	0	0	0	0	0	0	0.17	0	0	0	0	0
Peak_250	1	6857946	6858068	-	ENSBTAG00000004139	High	OK	OK	3.22	4.18	3.36	3.24	1.96	3.8	11.2	4.62	1.92	3.52	9.52	7.48	5.88	3.91	1.82	3.78	1.43	2.73	4.25	2.24	6.6	6.48	2.97	6.84	6.4	7.65	3.7	4.94	2.8	2.16	0	0	5.94	3.33	8.7	5.61	6.3	3.69	4.37	1.2	0.27
Peak_251	1	7053463	7053504	-	ENSBTAG00000007444	High	OK	OK	0	0	0	0.32	0	0	1.44	0.28	0	0	0	0	0.98	0	0	0	0	0	1.75	0	0.22	0	0	0.09	0.1	0	0	0	0	0	0	0	0	0	0.29	0	0.42	0.41	0.19	0	1.62
Peak_252	1	7113985	7114104	-	ENSBTAG00000007444	Low	OK	OK	2.53	2.86	3.92	3.8	0.28	6.27	3.84	1.4	0.64	3.68	2.21	2.04	0.98	5.52	4.16	1.62	3.38	1.26	2.5	0.42	2.86	9	11.07	11.07	11.8	0.45	1.3	1.3	0.3	3.24	0.75	2.22	2.7	1.11	4.35	2.72	4.2	11.89	3.23	5	4.86
Peak_253	1	7114136	7114254	+	ENSBTAG00000014233	High	OK	OK	26.22	13.97	16.52	20.36	5.04	18.24	20.8	25.06	5.44	27.04	16.49	37.4	28.91	68.54	24.44	47.52	16.9	25.41	20.75	12.74	22.88	46.44	36.18	72.18	59.5	36.45	19.4	34.58	19.7	13.32	6.75	7.03	32.67	23.68	31.03	38.76	34.86	35.67	26.22	16.8	11.61
Peak_254	1	7154908	7154986	-	ENSBTAG00000020122	High	OK	Likely_false	0.46	0.88	1.4	2.28	0.56	4.37	3.04	0.56	0.96	2.08	1.02	2.72	3.43	1.61	0.78	7.56	0.65	1.89	0	0.42	1.54	0.36	2.97	2.34	1	0.9	0.3	1.56	0.3	0.36	0.25	0	1.35	1.48	2.03	1.36	0	0.82	0.57	1.2	2.16
Peak_255	1	7155061	7155124	+	ENSBTAG00000020121	High	OK	OK	0.69	0.44	0	0.52	0.56	0.38	0.32	0	0.64	0	0.17	0	0	1.84	0.52	2.7	1.95	0	0	0.28	0.88	3.6	0.27	1.89	2.4	0.9	0.6	0.78	0.1	0.12	0.5	0	0.27	0	0	0.17	0	0	0	0.6	0.27
Peak_256	1	7155245	7155350	-	ENSBTAG00000020122	High	OK	OK	37.26	23.21	26.6	35.32	14.56	39.14	47.84	43.54	14.08	39.2	23.12	38.08	42.63	19.55	21.06	18.36	15.6	26.46	39	12.04	29.04	42.12	41.04	44.19	37	30.6	32.4	43.42	21.5	24.24	9	14.43	42.39	27.38	16.53	22.78	35.7	30.75	25.08	13	19.98
Peak_257	1	7155407	7155419	+	ENSBTAG00000020121	Low	OK	OK	0	0	0	0.12	0	0	0	0	0	0	0	0	0.49	0	0.52	0	0.26	0	0	0	1.76	0	0	0	0	0	0	0.26	0	0	0	0	0	0	0	0	0	0	0.19	0	0
Peak_258	1	7158985	7159001	-	ENSBTAG00000020122	Low	OK	Likely_false	0	1.65	0.84	0.32	0	1.71	0.32	0.28	0.64	0	0.34	2.04	2.94	0.23	0	1.08	0.13	0.42	0	0	0.22	0.72	0.54	1.89	1.9	0.45	0.3	0.78	1	0	0.25	0.37	0	0	0	0.17	0	0	0	0	2.7
Peak_259	1	7159016	7159103	+	ENSBTAG00000020121	High	OK	OK	7.13	2.86	1.4	9.28	2.24	3.61	8.96	1.54	0.96	1.92	9.52	2.04	4.41	9.2	5.2	9.72	2.08	6.72	4.25	2.24	7.04	15.48	8.37	10.71	16	4.05	2.9	8.06	4.4	4.56	2	2.96	7.56	9.62	5.22	3.06	0.42	2.05	3.8	0.8	2.43
Peak_260	1	7159257	7159330	-	ENSBTAG00000020122	Low	OK	Likely_false	0	1.87	0.42	0.64	0	1.9	1.44	0.7	0	0.32	0.34	2.04	2.45	0.46	1.82	1.08	0.65	0.84	0.25	0.42	0.66	0.72	1.89	1.08	0.9	1.35	0.4	1.82	0.3	0.72	0	0	0.27	0	0.29	0.34	1.68	0	1.14	0.6	0.54
Peak_261	1	7183630	7183691	-			OK	OK	1.38	0	0.14	0.56	0	0	0.16	0	0.32	0.16	0.34	0	0	2.3	0.26	0.54	0.39	0.21	0	0	0.66	1.44	0	0.72	0.9	0	0	0.26	0.1	0.24	0	0	0.27	0.74	0.58	1.02	0	0.41	2.09	0.2	1.35
Peak_262	1	7183789	7183897	+	ENSBTAG00000000201	High	OK	OK	18.17	13.09	4.76	9.92	5.04	16.15	26.4	26.74	14.4	12.8	8.16	15.64	11.76	11.73	19.5	22.14	16.12	9.24	7.25	6.3	13.42	23.04	30.78	32.76	31.7	23.85	12.5	24.18	11.4	12.6	4.25	11.1	17.82	7.77	8.41	13.6	23.52	10.66	14.06	8.8	16.2
Peak_263	1	7218623	7218645	+			OK	OK	0	0	0.14	0.04	0	0.19	0	0.42	0	0	0.17	0	0	0.23	0	0	0.26	0	0	0	0.22	0	0	0.27	0	0	0.1	0	0	0	0	0	0	0	0	0.17	0	0	0	0.2	0
Peak_264	1	7269091	7269109	+			OK	OK	0	0	0	0	0	0	0	0	0	0	0	0	0	0	0	0	0	0	0	0	0	0	0	0	0	0	0	0	0	0	0	0	0	0	0	0	0	0	0	0	0
Peak_265	1	7280832	7280876	-	ENSBTAG00000001412	High	OK	OK	3.68	2.09	3.36	1.96	0.28	1.71	5.44	3.78	1.92	4	1.19	8.16	2.45	3.22	2.34	4.32	4.68	0.84	2.5	0.7	1.32	7.2	3.78	7.38	4.6	3.6	2.1	3.38	1.5	0.96	0.25	0.74	2.16	2.59	4.64	7.82	10.92	11.48	8.74	2.8	2.43
Peak_266	1	7426141	7426150	+			OK	OK	0	0	0	0	0	0	0	0.7	0	0.16	0	0	0.49	0	0	0	0	0	0	0	0	0	0	0	0	0	0	0	0	0	0	0	0	0	0	0.68	0.42	0	0	0	0
Peak_267	1	7605523	7605547	+			OK	OK	0	0	0	0	0	0	0	0	0	0	0	0	0	0	0	0	0	0	0	0	0	0	0	0	0	0	0	0	0	0	0	0	0	0	0	0	0	0	0	0	0
Peak_268	1	8918058	8918065	+	ENSBTAG00000052332	High	OK	OK	0	0.11	0	0.24	0	0.19	0.16	0	0	0.8	0.85	0	0.49	0.23	0	0	0	0.42	0	0	0	0.36	0.27	0.99	0.8	0	0	0.26	0.6	0	0	0	0.27	0	0	0	0	0	0	0	0.27
Peak_268	1	8918058	8918065	+	ENSBTAG00000052349	High	OK	OK	0	0.11	0	0.24	0	0.19	0.16	0	0	0.8	0.85	0	0.49	0.23	0	0	0	0.42	0	0	0	0.36	0.27	0.99	0.8	0	0	0.26	0.6	0	0	0	0.27	0	0	0	0	0	0	0	0.27
Peak_269	1	9375803	9375813	-			OK	OK	0	0	0	0	0	0	0	0.14	0	0.16	0.34	0	0	0	0	0	0	0	0	0	0	0	0.27	0.36	0.5	0	0	0	0	0	0	0	0	1.48	0	0	0	0	0	0	0
Peak_270	1	9440161	9440267	+	ENSBTAG00000000648	Medium	OK	OK	0	0	0	0.12	0.28	0.95	0.16	0.14	0	0.64	1.36	0	0.98	0.92	0	1.08	0	0	0	0	0	2.16	5.67	2.52	2.1	0	0.1	0	0	0	0	0	0	0	0	0.17	0	0	0	0	0.27
Peak_271	1	9440580	9440604	-			OK	OK	0	0	0	0.04	0	0.57	0.48	0	0	0	0	2.04	0	0	0	0	0	0	0	0	0.22	1.08	0.54	0.18	0.3	0.9	0	0	0	0	0	0	0	0	0	0	0	0	0	0	0
Peak_272	1	9440732	9441033	+	ENSBTAG00000000648	High	OK	OK	0.23	1.54	3.92	34.28	3.64	26.41	115.04	9.52	1.28	22.88	36.21	69.36	55.86	0.69	0	2.16	0.52	5.25	2.25	3.78	9.46	7.56	3.24	5.04	7.4	3.15	3.3	8.84	0.4	0.48	0.25	0.37	17.82	4.44	6.38	0.17	3.78	0	1.14	0	0
Peak_273	1	9449992	9450004	+			OK	OK	0	0	0	0	0	0	0.96	0	0	0.48	0	0	0	0	0	0	0	0	0	0	0	0	0	0	0	0	0	0	0	0	0	0	0	0	0	0	0	0	0.19	0	0
Peak_274	1	9496797	9496798	+			OK	OK	0	0	0	0.2	0	0.19	0	0.42	0	0	0	1.36	0.49	0	0	0	0	0	0	0	0	0	0	0	0	0	0.4	0	0	0	0	0	0	0	0	0	0	0	0	0	0
Peak_275	1	9583730	9583754	+	ENSBTAG00000000706	High	OK	OK	1.38	0.33	0.84	7.36	2.52	3.04	7.68	36.12	14.72	43.68	4.76	0.68	0.98	1.15	1.56	0.54	0	4.83	0.75	2.94	2.86	0.36	1.08	0.54	0.4	2.7	1.5	0.78	0.6	0.24	0	1.11	3.51	1.48	9.57	3.23	1.68	0.82	2.47	0	0
Peak_276	1	9584748	9584821	+	ENSBTAG00000000706	High	OK	Likely_false	0	0	0.14	0.16	0	0	0.32	1.12	1.6	3.84	0.68	0	0	0.23	0	0	0	0	0	0	0	0	0	0	0	0	0	0	0	0	0	0	0.27	0	1.16	0	0	0	0	0	0
Peak_277	1	9585502	9585513	-			OK	OK	0	0	0	0	0	0	0.64	0	0	0	0	0	0	0	0	0	0	0	0	0	0	0	0	0	0	0	0	0	0	0	0	0	0	0	0	0	1.26	1.64	0	0	0
Peak_278	1	9586047	9586072	-			OK	OK	0	0	0	0.32	0	0.76	0.16	3.08	2.88	1.92	0.34	0	0.49	0	0	0	0	0.21	0	0	0.22	0.36	0	0	0.2	0	0	0	0	0.48	0	0	0.54	0	0.29	0.34	0	0	0.95	0	0
Peak_279	1	9586588	9586603	+	ENSBTAG00000000706	High	OK	Likely_false	0	0	2.66	0	0	0	0	0.14	0.64	0.16	0	0	0	0	0	0	0	0	0	0	0	0	0	0	0	0	0	0	0	0	0	0	0	0	0	0	0	0	0.57	0	0
Peak_280	1	9591208	9591379	+	ENSBTAG00000000706	High	Low_H3K4me3	Likely_false	0.46	0.33	0.14	0.32	1.68	0.19	0.64	8.54	11.84	6.24	1.36	0	0.98	0	0	0	0	1.26	0.75	1.82	0	0	0	0.18	0	0	1.1	0.26	0	0.24	0	0	0.81	0	0.58	0.51	0	0	1.52	0	0
Peak_281	1	9843488	9843506	-			OK	OK	0	0	0	0	0	0	0	0	0	0	0	0	0	0	0	0	0	0	0	0	0	0	0	0	0	0	0	0	0	0	0	0	0	0	0	0	0	0	0	0	0
Peak_282	1	9869362	9869618	+	ENSBTAG00000050914	High	OK	OK	5.29	15.84	9.8	30.8	12.32	29.45	50.72	5.74	3.84	5.12	25.5	53.04	8.33	13.34	13.52	12.42	10.01	2.31	5.75	2.8	7.92	12.6	8.37	17.1	7.9	11.7	2.2	3.9	5.1	4.92	1.75	4.07	17.01	18.13	17.69	23.97	25.2	61.91	22.42	5.8	14.58
Peak_283	1	9869839	9869853	+	ENSBTAG00000050914	High	OK	Likely_false	0	0.33	0.56	0.56	0	0	0.32	0	0.32	0	0.34	0.68	0.49	0	0	0.54	0.52	0	0	0	0	0.72	0	0.81	0.4	0	0.3	0.78	0.1	0	0	0	0.27	0.37	0.29	0.34	0	2.87	0.76	0	0
Peak_284	1	9894943	9894947	+			OK	OK	0	0	0	0.28	0.84	0	0	0	0.32	0	0	0	0	0	0.52	0	0	0	0	0	0	0	0	0.09	0	0	0	0	0.1	0	0	0	0	0	0	0.34	0	1.23	0.19	0	0
Peak_285	1	9997827	9997828	-			OK	OK	0	0	0	0	0	0	0	0	0	0	0	0	0	0	0	0	0	0	0	0	0	0	0	0	0	0	0	0	0	0	0	0	0	0	0	0	0	0	0	0	0
Peak_286	1	10014101	10014158	+			OK	OK	0	0	0	0	0	0	0	0	0.64	0	0	0	0	0	0	0	0	0	0	0	0	0	0	0	0	0	0	0	0	0	0	0	0	0	0	0	0	0	0	0	0
Peak_287	1	10042307	10042324	+			OK	OK	0	0	0	0	0	0	0	0	0	0	0	0	0	0	0	0	0	0	0	0	0	0	0	0	0	0	0	0	0	0	0	0	0	0	0	0	0	0	0	0	0
Peak_288	1	10174666	10174683	-			OK	OK	0	0	0	0	0	0	0	0	0	0	0	0	0	0	0	0	0	0	0	0	0	0	0	0	0	0	0	0	0	0	0	0	0	0	0	0	0	0	0	0	0
Peak_289	1	10228657	10228723	-			OK	OK	0	0	0	0	0	0	0	0	0	0	0	0	0	0	0	0	0	0	0	0	0	0	0	0	0.1	0	0	0	0	0	0	0	0	0	0	0	0	0	0	0.2	0
Peak_290	1	10231258	10231273	+	ENSBTAG00000017753	High	OK	OK	0	0	0	0.04	0	0	0	0.14	0	0	0	0	0	0	0	0	0	0	0	0.14	0.22	0	0	0.36	0	0	0	0	0	0	0	0	0	0	0	0	0	0	0	0	0
Peak_291	1	10231635	10231681	-			OK	OK	0	0.55	0.7	0.12	0	0	0.32	0	0	0.16	0	0.68	0.49	0.46	0.78	0.54	0.39	0	0	0.28	0.22	1.08	1.08	0.36	0	0	0.2	0	0	0.48	0	0	0.27	0	0	0	2.1	0.41	0.95	0	0.81
Peak_292	1	10231681	10231857	+	ENSBTAG00000017753	High	OK	OK	60.72	52.69	48.44	63	45.92	51.87	70.56	109.48	90.24	191.2	180.71	139.4	142.1	167.67	80.6	222.48	63.83	42.63	53.75	25.2	43.78	81	93.15	109.62	84.1	51.3	45.9	89.7	10.2	70.92	13.25	19.98	57.51	35.52	42.63	74.46	100.38	67.65	96.71	57.2	83.16
Peak_293	1	10259153	10259154	+			OK	OK	0	0	0	0	0	0	0	0.14	0	0	0.68	0	0	0	0.26	2.7	0	0.21	0	0	0	0	0	0.54	0	0	0	0	0	0.36	0.25	0.74	0	0	0	0	0	0	0	0	0
Peak_294	1	10326782	10326794	+	ENSBTAG00000017753	Low	OK	OK	0.23	0.11	0	0.04	0	0	0	0	0.32	0.32	0	0	0	0	0	0	0	0	0	0.28	0	0	0	0.09	0.1	0	0	0	0	0.36	0.25	0	0	0	0	0.17	0	0	0	0.2	0
Peak_295	1	10328362	10328387	+			OK	OK	0	0	0.56	0	0	0	0	0	0	0	0	0	0	0	0	0	0	0	0	0	0	0	0	0	0	0	0	0	0	0	0	0	0	0	0	0	0	0	0	0	0.81
Peak_296	1	10348850	10348890	+			OK	OK	0.23	0.11	0.28	0	0	0	0.16	0.56	0	0	0	0	0	0	0	0	0	0	0	0.28	0.44	0	0	0	0.2	0	0.3	0.78	0	0	0	0	0	0	0	2.04	0	0.82	0.19	0	0
Peak_297	1	10349115	10349128	+			OK	OK	0.23	0.22	0.14	0.08	0	0	0	0.28	0	0.32	0	0	0	0.46	0	0	0	0	0	0	0.44	0	0	0	0	0	0	0	0	0	0	0	0	1.48	0	0.51	0	0.41	0	0	0
Peak_298	1	10360222	10360229	+	ENSBTAG00000017753	High	Low_H3K4me3	OK	0	0.44	0.7	0.32	5.88	0	0.16	0.98	2.24	0.48	2.89	0	0.98	0.69	0.78	1.08	0.26	0.42	0.5	0.42	0.22	0	0	0.63	0.5	0	1.3	1.04	0	0.36	0.5	0	0	0.37	0	0.34	0	0.41	1.71	0.4	0.27
Peak_299	1	10362747	10362754	+	ENSBTAG00000017753	High	OK	OK	0.46	0.66	1.82	0.44	0.84	0	0.48	1.12	8	1.28	0.17	0	0	0.69	0.26	1.62	0.65	0	1	1.4	0.22	0	0	0.36	0.1	0	3.5	0.26	0	0.6	0.25	0.37	0.27	0	0	0.17	0	0.41	1.33	0	0.27
Peak_300	1	10366848	10366868	+			OK	OK	0	0	0	0	0	0	0	0	0	0.16	0	0	0	0	0	0	0	0	0	0.28	0	0.72	0	0	0.4	0	0.1	0.26	0	0	0	0	0	0	0	0.51	0	0	0.95	0	0
Peak_301	1	10367076	10367116	+			OK	OK	0.23	0	0	0	0	0	0	0.28	0	0	0.34	0	0	0.69	0	0	0	1.05	0.75	0	0.66	0	0	0	0	0	0.1	0	0	0	0	0	0	0	0	0.34	0	0	0	0.2	0
Peak_302	1	10372466	10372482	+			OK	OK	0.23	0.55	0.14	0.4	0	0	0	0.28	0	0	0	0	0	0	0	1.08	0	0.21	0	0.42	0.22	0.36	0	0.09	0.4	0	0	1.3	0	0.48	0	0	0	0	0	0	0	0	0.76	0	0
Peak_303	1	10374453	10374467	+			OK	OK	0	0	0	0.08	0	0	0	0	0	0.32	0.51	0	0	0	0	0	0	0	0	0	0	0	0	0	0.2	0	0	0	0	0	0	0	0	0	0	0	0	0	0.38	0.2	0
Peak_304	1	10383267	10383282	+			OK	OK	0	0	0	0.08	0	0	0	0	0	0	0	0	0	0	0	1.62	0	0	1.25	0.14	0.22	0	0	0	0	0	0	0	0	0	0	0	0	0	0	0	0	0	0	0	0
Peak_305	1	10383435	10383449	+			OK	OK	0.23	0	0	0	0	0	0	0	0.32	0	0	0	0	0	0.52	0	0.26	0	0	0	0	0	0	0	0.3	0	0	0	0	0	0	0	0	0	0	0.17	0	0	0.38	0	0
Peak_306	1	10388191	10388198	+			OK	OK	0	1.65	0	0	0	0	0	0	0	0.64	1.02	0	0	0	0	0	0	0	0	0	0	0	0	0.18	0	0	0	0	0	0	0.75	0	0	0	0	0	0	0	0	0	0
Peak_307	1	10416408	10416416	+			OK	OK	0	0	0	0.04	0	0	0	0.42	0	0	0.17	0	0	0	0	0	0.26	0	0	0	0.44	0	0.27	0	0.1	0	0	0	0	0	0	0	0	0	0	0	0	0	0	0	0
Peak_308	1	10418789	10418813	+			OK	OK	0	0	0	0.12	0	0	0.16	0.28	0	0	0.68	0.68	0	0	1.3	0	0	0	0	0	0	0	0	0.18	0.3	0.45	0.1	0	0	0	0	0	0	0.37	0	0.34	0	0	0.19	0	0
Peak_309	1	10433165	10433166	+			OK	OK	0	0	0	0.12	0	0	0	0	0.96	0	0.51	0	0	0.46	0	0	0.65	0	0	0	0	0.36	0	0.72	0.1	0	0	0	0.1	0	0	0	0	0	0	0.51	0	0	0.19	0	0
Peak_310	1	10444440	10444443	+	ENSBTAG00000017753	Medium	OK	OK	0	0.22	0	0.04	0	0	0	0.14	0.64	0.16	0.68	0	0	0	0.52	0	0.13	0.42	0	0	0	0	0	0	0	0	0.2	0	0.2	0.24	0	0	0	0	0	0.17	0	0.41	0.57	0.2	0
Peak_311	1	10469101	10469112	+	ENSBTAG00000017753	High	Low_H3K4me3	OK	0	0	0.14	0.08	4.76	0	0.16	0.28	0.32	0	0	0.68	0.49	0	1.04	1.08	0.39	0.42	0	0	0	0	0.54	0.09	0	0.9	0.6	0	0	0	0	0	0	0.74	0	0.68	0	0.41	0.19	0	0
Peak_312	1	10473632	10473647	+			OK	OK	0	0	0	0	0	0	0	0	0	0	0	0	0	0	0	0	0	0	0	0	0.22	0	0	0	0	0	0.4	0	0	0	0	0	0	0	0	0.17	0	0	0	0	0
Peak_313	1	10498407	10498414	+			OK	OK	0	0.22	0.28	0	0	0	0.16	0.14	1.6	0	0	0	0	0	0	0	0	0	0	0	0	0	0	0.36	0.4	0	0	0.52	0	0	0	0	0	0.37	0	0	0	0	0	0	0
Peak_314	1	10506796	10506888	+			OK	OK	0	0	0.14	0	0	0	0.16	0	0.32	0.16	0.85	0	0	0	2.34	0	0.13	0	0	0	0.22	0.72	0	0	0.1	4.05	0.3	0	0	0	0	0.37	0.27	0	0	0.51	0	0	0.38	0.4	0
Peak_315	1	10520833	10520929	+	ENSBTAG00000017753	High	OK	OK	0	0	0	0	0	0	0	0	0	0	0	0	0	0	0	0	0.13	2.73	3	0.98	3.74	0.36	0	0	0	0.45	0	1.3	0.2	0.24	0.25	0	0	0	0	0	0	0	0	0	0
Peak_316	1	10528381	10528402	+			OK	OK	0	0	0	0	0	0	0	0.42	1.6	0	0	0	0	0	0.26	0	0.39	0	0	0	0.44	0	0	0.09	0	0	0.1	0	0	0	0	0	0	0	0	0.34	1.26	2.05	0.19	0	0
Peak_317	1	10531001	10531058	+	ENSBTAG00000017753	High	Low_H3K4me3	OK	2.3	1.32	2.38	1.08	1.4	0.76	1.12	4.2	8	2.56	0.85	1.36	1.96	1.38	2.34	1.08	1.69	2.73	0.25	2.24	1.54	0.72	1.62	0.63	2	1.35	2.6	1.3	0.5	1.56	1	1.11	0.54	1.11	0.87	4.25	0.42	4.51	7.79	1	0.27
Peak_318	1	10542989	10543000	+	ENSBTAG00000017753	Medium	OK	OK	0	0.11	0.14	0.08	0	0	0	0	0.32	0.16	0	0	0	0	0	0	0.13	0.42	0	0	0	0.36	0	0.18	0	0	0.1	0	0	0	0	0.37	0	0	0	0.17	0.42	0	0.19	0	0
Peak_319	1	10543821	10543843	+	ENSBTAG00000017753	High	Low_H3K4me3	OK	1.15	0.66	0.84	0.36	0	0.38	0	3.08	0.32	1.28	0.51	1.36	0.98	2.76	1.04	1.62	1.04	2.73	1.25	0.98	0.44	1.44	0	2.07	1.5	0.45	0.5	0.78	0	0.48	0	0	0.27	0	0	2.89	0	4.51	2.85	0.2	2.7
Peak_320	1	10665254	10665266	-	ENSBTAG00000019043	High	OK	OK	0	0	0	0.04	0	0	0	0.14	0	0	0.17	0	0	0.69	0.78	0.54	0.26	0	0.75	0	0	0	0.54	0.09	0.2	0	0	0	0	0	0	0	0	0	0	6.97	0	9.02	1.71	0	0
Peak_321	1	10672220	10672232	-			OK	OK	0.23	0.11	0	0	0	0	0	0	0	0	0	0	0	0	0.78	0	0	0	0	0	0	0	0	0.18	0.4	0	0	0.26	0	0	0	0	0.27	0	0	0	0	0	0	0	0
Peak_322	1	10674378	10674389	-			OK	OK	0	0	0	0	0	0	0	0	0	0	0	0	0	0	0	0	0	0	0	0.14	0	0	0	0	0	0	0.2	0	0	0	0.5	0	0	0	0	0	0	0	0	0	0
Peak_323	1	10690867	10690906	-	ENSBTAG00000019043	Medium	OK	OK	0	0.11	0.14	0.12	0	0.19	0	0	0	0.96	0.17	0	0	0.23	0	0.54	0.13	0	0.25	0	0.22	0.36	0.27	0.27	0.2	0	0.2	0	0	0.12	0	0	0.54	0	0	0	0	0	0	0	0.54
Peak_324	1	10690882	10691111	+	ENSBTAG00000000605	High	OK	OK	4.83	12.54	12.6	36.88	12.32	59.47	32.16	36.54	10.24	23.36	19.89	51.68	19.11	47.61	32.76	34.02	27.95	20.79	9.75	5.88	22.44	38.52	41.85	37.26	38.9	25.2	12.4	20.8	11.8	13.32	2.75	14.43	36.45	9.99	11.6	41.65	49.14	27.06	30.4	5.8	12.69
Peak_325	1	10691196	10691297	-	ENSBTAG00000019043	High	OK	OK	8.74	4.07	10.78	18	7.56	14.82	10.24	11.34	2.88	25.92	21.76	21.76	31.85	8.97	5.2	9.72	3.51	9.87	16.5	8.4	9.9	13.68	11.88	22.05	14.5	14.85	15.1	18.46	8.8	6.72	4.5	1.48	14.04	7.77	13.92	6.97	11.34	9.84	9.69	8	7.02
Peak_326	1	10691531	10691979	+	ENSBTAG00000000605	High	OK	OK	92.69	243.76	304.36	328.2	85.12	373.92	309.76	474.32	66.56	465.12	154.36	706.52	401.8	831.68	464.62	510.3	261.43	504.21	374.75	95.48	485.1	581.04	604.26	624.15	820.5	351.9	268.2	463.32	399.7	166.92	60	190.18	561.6	336.7	200.68	2435.25	2938.74	1243.12	1146.46	148.8	178.74
Peak_327	1	10691657	10691713	-	ENSBTAG00000019043	High	OK	OK	2.3	0.66	0.84	4.92	5.32	4.94	5.76	7.7	1.28	7.84	8.84	11.56	9.31	2.76	0.78	2.16	1.82	3.78	2	1.54	2.2	3.24	1.35	2.79	2.7	0.45	2.2	5.46	2.7	1.2	0.5	0	1.62	2.59	2.32	1.36	2.52	3.28	3.42	1.4	1.08
Peak_328	1	10695148	10695172	+	ENSBTAG00000000605	High	OK	OK	0.23	0.99	0.42	0.4	0	0.95	0.32	0.98	0	0.48	0.68	0	0	0.46	0.52	0	0.13	0.21	0.75	0.14	0	0	0.54	0.81	0.3	0.45	0.3	1.04	1.1	0.36	0	0	1.35	0.37	0	3.74	10.5	2.05	1.9	0.4	0
Peak_329	1	10787736	10787947	-	ENSBTAG00000000603	High	OK	OK	0	3.08	3.36	8.84	17.92	1.71	10.4	6.02	0.96	5.12	3.23	0	4.41	7.59	8.32	3.78	0.78	2.52	1.25	0.14	1.32	7.56	1.62	4.14	1.5	4.5	0.9	0.52	0.3	1.68	0	0.37	5.94	14.06	0.29	5.44	3.36	4.51	4.37	1.6	10.26
Peak_330	1	10811675	10811743	+	ENSBTAG00000019542	Low	OK	OK	0	0	0	0	0	0	0	0	0	0	0	0	0	0	0	0	0	0	0	0	0	0	0	0	0	0	0	0	0	0	0	0	0	0	0	0	0	0	0	0	0
Peak_331	1	10823211	10823354	+	ENSBTAG00000019542	High	OK	OK	14.49	8.36	15.4	2.16	1.12	2.85	16.96	1.82	8.32	4.48	23.12	1.36	22.54	13.8	9.1	36.72	9.1	8.19	5.25	9.1	9.46	28.8	15.66	32.13	26.9	11.7	19.2	31.98	6.7	3.36	4	9.99	14.31	23.68	32.77	29.92	39.48	78.31	34.39	10.6	15.93
Peak_332	1	10833621	10833636	+	ENSBTAG00000019542	Medium	OK	OK	0	0	0	0	0	0	0	0	0	0	0	0	0	0	0	0	0	0	0	0	0	0	0	0	0	0	0.6	0	0	0	0	0	0	0	0	0	0	0	0	0	0
Peak_333	1	10848648	10848649	-			OK	OK	0	0	0.28	0	0	0	0	0	0	0	0	0	0	0	0	0	0	0	0	0.28	0	0	0	0	0	0	0.8	0	0	0	0.5	0.37	0	0	0	0	0	0	0	0	0
Peak_334	1	10876663	10876678	+			OK	OK	0	0	0	0	0	0	0	0	0	0	0	0	0	0	0	0	0	0	0	0	0	0	0	0	0	0	0	0	0	0	0	0	0	0	0	0	0	0	0	0	0
Peak_335	1	11580797	11580809	+	ENSBTAG00000038900	Low	OK	OK	0	0	0.14	0	0	0	0	0	0	0	0	0.68	0	0	0	0.54	0	0	0	0.14	0.22	0	0	0.09	0	0	0.1	0	0	0	0	0	0	0	0	0	0	0	0	0	0
Peak_336	1	11716096	11716147	-			OK	OK	0	0	0	0	0	0	0	0	0	0	0	0	0	0	0	0	0	0	0	0	0	0	0	0	0	0	0	0	0	0	0	0	0	0	0	4.59	1.68	9.43	6.65	0	0
Peak_337	1	11780862	11780888	-			OK	OK	0	0	0	0	0	0	0	0	0	0	0	0	0	0	0	0	0	0	0	0	0	0	0	0	0	0	0	0	0	0	0	0	0	0	0	0	0	0	0	0	0
Peak_338	1	11780951	11780962	+			OK	OK	0	0	0	0	0	0	0	0	0	0	0	0	0	0	0	0	0	0	0	0	0	0	0	0	0	0	0	0	0	0	0	0	0	0	0	0	0	0	0	0	0
Peak_339	1	12365286	12365336	-			OK	OK	0	0	0	0	0	0	0	0	0	0	0	0	0	0	0	0	0	0	0	0	0	0	0	0	0	0	0	0	0	0	0	0	0	0	0	0	0	0	0	0	0
Peak_340	1	13503123	13503163	+			OK	OK	0	0	0	0	0	0	0	0	0	0	0	0	0	0	0	0	0	0	0	0	0	0	0	0	0	0	0	0	0	0	0	0	0	0	0	0	0	0	0	0	0
Peak_341	1	13756054	13756104	-			OK	OK	0	0	0	0	0	0	0	0	0	0	0	0	0	0	0	0	0	0	0	0	0	0	0	0	0	0	0	0	0	0	0	0	0	0	0	0	0	0	0	0	0
Peak_342	1	13756155	13756196	+			OK	OK	0	0	0	0	0	0	0	0	0	0	0	0	0	0	0	0	0	0	0	0	0	0	0	0	0	0	0	0	0	0	0	0	0	0	0	0	0	0	0	0	0
Peak_343	1	14618671	14618685	+			OK	OK	0	0	0	0	0	0	0	0	0	0	0	0	0	0	0	0	0	0	0	0	0	0	0	0	0	0	0	0	0	0	0	0	0	0	0	0	0	0	0	0	0
Peak_344	1	15406338	15406391	-	ENSBTAG00000003301	High	OK	OK	0	0	0	0	0	0	0	0	0	0	0	0	0	0	0	0	0	0	0	0	0	0	0	0	0	0	0	0	0	0	0	0	0	0	0	0	0	0	0	0	0
Peak_345	1	15883083	15883277	-	ENSBTAG00000003301	High	OK	OK	0.92	0.11	0	0.36	0	0.57	1.28	0.56	0	1.28	2.38	1.36	1.96	133.63	81.12	119.34	55.9	1.68	0	0.42	0.88	38.16	21.33	31.59	44.4	2.25	1.2	0.78	0	0.12	0	0	1.35	0.37	0.58	0.51	0.42	0	0.76	25.2	33.21
Peak_346	1	15883675	15883741	-			OK	OK	0	0	0	0	0	0	0	0	0	0	0	0	0	5.52	5.98	9.72	5.46	0	0	0	0	0.36	0	0.36	0.6	0	0	0	0	0	0	0	0	0	0	0	0	0	0	0.6	0.54
Peak_347	1	15894418	15894437	+			OK	OK	0	0	0	0	0	0	0	0	0	0	0	0	0	0	0	0	0	0	0	0	0	0	0	0	0	0	0	0	0	0	0	0	0	0	0	0	0	0	0	0	0
Peak_348	1	16248106	16248113	-			OK	OK	0	0	0	0	0	0	0	0	0	0	0	0	0	0	0	0	0	0.21	1.25	0.14	0.66	0	0	0	0	0.45	0.3	0.52	0	0.12	0	0	0	0	0	0	0	0	0	0	0
Peak_349	1	16823968	16823995	-			OK	OK	0	0	0	0	0	0	0	0	0	0	0	0	0	0	0	0	0	0	0	0	0	0	0	0	0	0	0	0	0	0	0	0	0	0	0	0	0	0	0	0	0
Peak_350	1	17940517	17940518	+			OK	OK	0.23	0	0	0	0	0	0	0	0	0	0	0	0.49	0	0	0	0.13	0	0	0.42	0	0	0	0	0	0.45	0	0	0	0	0	0	0	0	0	0	0	0	0	0	0
Peak_351	1	18567910	18568030	+	ENSBTAG00000000597	High	OK	OK	0	0	0	0	0	0.19	0	0	0	0	0	0	0	0	0	0	0	3.57	2	0	0.44	0	0	0	0	0.45	1.9	3.12	131.2	40.56	15.75	31.08	0	0	0	0	0	0	0	0	0
Peak_352	1	18736871	18736891	-	ENSBTAG00000000588	High	OK	OK	0	0	0.14	1.8	0	2.47	0.32	0.56	0.32	0.48	5.78	7.48	3.92	0.23	0	0.54	0.26	2.1	1	0.84	0.88	0	0	0.36	0	0.45	0.7	1.04	0	0.24	0.25	0	1.35	0.74	0	0	0	0	0.38	1.2	0
Peak_353	1	19088001	19088027	+	ENSBTAG00000001395	Low	OK	OK	0	0	0	0	0	0	0	0	0	0	0	0	0	0	0	0	0	0	0	0	0	0	0	0	0	0	0	0	0	0	0	0	0	0	0	0	0	0	0	0	0
Peak_354	1	19227524	19227661	+	ENSBTAG00000001395	High	OK	OK	0.23	0.66	0.14	2.28	0	1.14	10.24	6.02	0.32	2.88	3.23	8.16	2.45	2.99	9.1	4.32	1.17	1.47	0.75	0.14	1.32	3.6	4.59	2.25	1.2	2.25	3	4.68	1.4	1.08	0.25	0.74	5.4	0.37	0.87	1.36	1.68	2.05	0.95	0.2	5.4
Peak_355	1	19227798	19227851	-			OK	OK	0	0.11	0	0.12	0	0	0.16	0.42	0	0.32	0	1.36	0	0.23	0.52	1.08	0.65	0	0	0	0	0	1.08	0.18	0.6	0	0	0	0	0	0.25	0	0	0	0	0	0	0	0.19	0.4	0.81
Peak_356	1	19227839	19228126	+	ENSBTAG00000001395	High	OK	OK	2.3	24.64	28.42	104.32	56	65.36	518.4	201.04	85.76	175.2	205.19	533.8	468.93	98.9	74.88	62.64	35.1	42.42	53.25	9.66	56.76	60.48	60.75	51.03	38.2	85.05	84.6	97.76	32.3	36.48	15.5	47.36	98.01	82.88	36.83	39.44	65.94	31.98	42.94	8.4	194.13
Peak_357	1	19228561	19228595	+	ENSBTAG00000001395	High	OK	OK	0	0	0	0	0	0	0.16	0	0	0	0	0	0	0	0	0	0	0	0	0	0	0	0	0	0.1	0	0	0	0	0	0.25	0	0	0	0	0	0	0	0	0	0
Peak_358	1	19228915	19228921	+	ENSBTAG00000001395	Medium	OK	OK	0	0.11	0.14	0.12	1.12	0	0.48	0.7	0	1.12	1.36	0	0.49	0	0	0	0.26	0.21	0	0.14	0	0	0	0.09	0	0	0	0.52	0	0	0	0	0	1.11	0	0	0	0	0	0	0
Peak_359	1	19260162	19260318	+			OK	OK	0.23	0	0.14	0.12	0.84	0.19	1.28	0.7	3.2	0	0	0	0	0	0.52	0	0.39	0.42	0	0.14	0.44	0	0	0	0	1.35	0.6	0	0.1	0.12	0	0.74	0	0	0	0.34	0	0	0.19	0	0
Peak_360	1	19418134	19418260	+	ENSBTAG00000018704	High	OK	OK	8.74	3.85	9.52	3.52	3.64	22.23	48.64	14	3.52	14.08	29.58	66.64	45.08	0	0.26	1.08	1.82	14.07	6.75	3.78	14.52	3.24	2.97	0.45	6.1	8.55	9.2	12.48	7.2	2.04	1.5	3.7	10.8	6.66	9.28	31.79	40.74	75.85	33.82	2	5.67
Peak_361	1	19467740	19467810	-			OK	OK	0	0	0	0	0	0	0	0	0	0	0.17	0	0	0	3.38	0	0	0	1.5	0	0	0	0	0	0	0	0	0	0	0.12	0.25	0	0.54	0	0	0	0	0.82	0.57	0	0
Peak_362	1	19491276	19491282	-			OK	OK	0	0	0.28	0	0	0	0	0	0	0	0	0	0	0	0	0	0	0	0	0	0	0	0	0	0	0	0.2	0	0	0	0.5	0	0	0	0	0	0	0	0	0	0
Peak_363	1	19502303	19502607	-	ENSBTAG00000004869	High	OK	OK	75.9	23.21	42	24	7.84	17.67	22.72	2.24	1.28	2.56	31.11	48.28	22.54	20.7	16.12	30.78	11.05	18.9	12.25	8.26	20.46	12.96	5.4	16.83	13.4	41.85	28.4	50.96	22.4	33.36	9.25	4.07	21.33	21.09	5.22	37.91	56.28	101.68	60.8	4.6	2.97
Peak_364	1	20150208	20150259	+			OK	OK	0	0	0	0	0	0	0	0	0	0	0	0	0	0	0	0	0	0	0	0	0	0	0	0	0	0	0	0	0	0	0	0	0	0	0	0	0	0	0	0	0
Peak_365	1	20343860	20344013	-			OK	OK	0	0	0	0	0	0	0	0	0	0	0	0	0	0	0	0	0	0	0	0	0	0.36	0	0	0	0	0	0	0	0	0	0	0	0	0	0	0	0	0	0	0
Peak_366	1	20381292	20381295	-			OK	OK	0	0	0	0	0	0	0	0	0	0	0	0	0	0	0	0	0.65	0	0	0	0	0	0	0	0	0	0	0	0	0	0	0	0	0	0	0	0	0	0	0	0
Peak_367	1	20385504	20385512	-			OK	OK	0	0	0.28	0	0	0	0	0	1.6	0	0	0	0	0	0	0	0	0.21	0	0	0	0	0	0	0.4	0	0.2	0	0	0.36	0	1.11	0	0	0	0	0	0	0	0	0
Peak_368	1	20386610	20386732	-			OK	OK	0	0	0.56	1.68	1.12	5.13	1.6	2.1	1.92	4.96	1.19	1.36	0	6.44	0.52	4.86	1.04	1.05	0	0.28	1.1	4.32	2.16	6.21	3.8	0	0	0.26	0	0	0	0.37	1.89	3.7	1.16	1.02	0	1.23	1.33	3.6	1.62
Peak_369	1	20387190	20387339	-			OK	OK	0	0.11	0.14	0.88	0	1.52	0.32	2.1	0.32	2.72	1.19	0	0.49	19.78	11.7	20.52	13.13	0	0	0	0.22	19.44	22.41	12.78	16.9	0	0.1	0	0	0.12	0	0	0	0	0	2.04	7.14	4.1	4.56	13.2	25.65
Peak_370	1	20387243	20387386	+			OK	OK	0	0	0	0.12	0	0	0.8	0.42	0	0.48	0.17	0	0	5.98	10.92	1.62	4.42	0	0	0	0	11.88	26.46	14.94	12.3	0	0	0	0	0	0	0	0	0	0	0	0.42	0	0.38	0	14.85
Peak_371	1	20388638	20388662	-			OK	OK	0	0	0	0.04	0	0	0	0.28	0	0.48	0	0	0	0.92	0.78	0.54	0.39	0	0	0	0.22	0.72	2.16	1.17	3.2	1.35	0.1	0	0	0	0	0	0.27	0	0	0	0	0	0.38	0.2	0
Peak_372	1	20388684	20388749	+			OK	OK	0	0	0	0	0	0	0	0.28	0	0	0	0	0.98	0	1.82	1.08	0.39	0	0	0	0	2.88	4.32	3.69	3.7	0	0	0	0	0	0	0	0	0	0	0	0	0	0	0.6	0.27
Peak_373	1	20391678	20391701	-			OK	OK	0	0	0	0.16	0	0.19	0.16	0.84	0	1.12	0.68	0	0	0	1.3	0.54	0.13	0	0	0	0	0	1.08	0.09	0.3	0.9	0	0	0	0.6	0	0	0	0	0	0	1.68	0.82	0.57	0	0
Peak_374	1	20400103	20400118	-			OK	OK	0	0	0.28	0	0	0	0	0.28	0.64	0	0	0	0	0.23	0	0	0	0	0	0	0	0	0	0.09	0.1	0	0	0	0	0	0	0	0	0	0	0	0	0	0	0.2	0
Peak_375	1	20410254	20410255	-			OK	OK	0	0	0	0	0	0.19	0	0	0	0.32	0.17	0	0	0	0	0	0	0	0	0	0	0	0	0	0	0	0	0	0	0	0	0	0.27	0	0.29	0.34	0	0	0.38	0	0
Peak_376	1	20416045	20416058	-			OK	OK	0	0	0	0	0	0	0	0	0	0	0	0	0	0	0	0	0	0.63	0	0	0	0	0	0	0	0	0	0	0	0	0	0	0	0	0	0	0	0	0	0	0
Peak_377	1	20432102	20432114	-			OK	OK	0	0	0	0	0	0.19	0	2.24	0	0.8	0.17	0	0.98	0	1.3	0	0.13	0	0	0.56	0.66	0	1.08	0	0	0	0	0.26	0	0.12	0	0	1.08	0.37	0	0	0	0	0	0	0
Peak_378	1	20433160	20433186	-			OK	OK	0	0	0	0	0	0	0	0	0	0	0	0	0	0	0	0	0	0	0	0	0	0	0	0	0	0	0	0	0	0	0	0	0	0	0	0	0	0	0	0	0
Peak_379	1	20437165	20437218	-	ENSBTAG00000054337	High	OK	Likely_false	0	0	0	0.72	0	1.52	0.16	1.82	0.96	0.16	0.17	0	0.49	0	0	0.54	0	0	0	0	0.22	3.6	0	0.81	1.3	0	0.1	0	0	0	0	0	0	0	0	0	0.42	0.41	0.57	0	0
Peak_380	1	20439216	20439374	-	ENSBTAG00000054337	High	OK	Likely_false	0.23	0	0	1.4	0	4.56	1.28	3.08	0.64	4.48	0	0.68	4.41	1.15	3.38	0.54	0.26	1.68	0	0.42	0.22	3.24	5.67	5.67	1.9	0.45	0.7	0.52	0.2	1.2	0.25	0.74	0.54	2.59	0	0.51	3.78	0	0.95	2.6	2.16
Peak_381	1	20439552	20439567	-			OK	OK	0	0	0.28	0	0	0	0	0.14	0	0	0.51	0	0	0	0	0	0	0	0	0	0	0	0	0.72	0	0	0	0	0	0	0	0	0	0	0	0	0	0.41	0	0.2	0
Peak_382	1	20495046	20495061	-			OK	OK	0	0	0	0	0	0	0.16	0	0.96	0.32	0	0	0	0.46	0	0	0	0	0	0	0	0	0	0	0	0	0	0	0	0	0	0	0	0	0	0	0	0.41	0.19	0.2	0
Peak_383	1	20502079	20502086	-			OK	OK	0	0	0	0.04	0	0.19	0	0.14	0.32	0.8	0	0	0	0	0	0	0	0	0	0	0	1.08	0	0.09	0.2	0	0	0	0	0.12	0	0	0	0	0	0.17	0	0	0	0	0
Peak_384	1	20516907	20516921	-			OK	OK	0	0	0	0	0	0.57	0	0	0.64	0	0	0	0	0	0	0	0	0	0	0	0	0	0	0	0	0	0	0	0	0	0	0	0	0	0	0	0	0	0	0	0
Peak_385	1	20521142	20521157	-			OK	OK	0	0	0	0.04	0	0.19	0	0.42	0	0.32	0.17	0	0	0	0	0.54	0	0	0	0	0	0.72	0	0.27	0	0	0	0	0.2	0	0	0	0	0	0	0	0	0	0	0	0
Peak_386	1	20528485	20528533	-	ENSBTAG00000054337	Medium	OK	Likely_false	0	0	0	0	0	0	0	0	0	0	0	0	0	0	0	0	0	0	0	0	0	0	0	0	0	0	0	0	0	0	0	0	0	0	0	0	0	0	0	0	0
Peak_387	1	20535131	20535143	-			OK	OK	0	0.11	0	0	0	0	0	0.14	0	0.48	0.17	0	0	0	0	0	0	0	0	0	0	0	0.81	0	0	0	0	0	0	0	0	0	0.54	0	0	0	0	0	0	0	0
Peak_388	1	20582078	20582092	-	ENSBTAG00000054337	Medium	OK	Likely_false	0	0	0.14	0.04	0	0.76	0.32	0	0	0	0	0	0	0	0	0	0.13	0.21	0	0	0	1.8	0	0.45	0.9	0	0	0	0	0	0	0	0	0	0	0.34	0	0	0	0	0
Peak_389	1	20582863	20583174	-	ENSBTAG00000054337	High	OK	OK	1.61	0.44	6.02	10.16	3.64	12.16	14.56	19.04	4.8	14.72	3.23	7.48	9.31	4.6	1.82	1.62	1.95	2.31	1.5	0.14	5.94	4.68	3.24	4.68	5.8	0.9	2.6	0	2.8	3.84	0.5	4.07	10.26	14.43	8.7	4.59	11.34	9.43	9.88	1.2	2.7
Peak_390	1	20583325	20583356	-	ENSBTAG00000054337	High	OK	Likely_false	0	0	0	1.28	1.4	3.42	0.96	1.54	0	1.92	0.17	0	2.94	0.23	1.3	1.08	0.39	0	0	0.14	0.22	0.36	0	1.08	1.7	0.45	0	0	0	0.12	0	0	0.54	0	1.16	0	0.42	0	0.38	0	0
Peak_391	1	20591734	20591751	-			OK	OK	0	0	0	0	0	0.76	0	0.14	0	0	0	0	0	0	0	0	0	0	0	0	0	0	0	0.18	0.2	0	0	0	0	0	0	0	0	0	0	0	0	0	0	0	0
Peak_392	1	20648034	20648043	-			OK	OK	0	0	0	0.04	0	0	0	0	0	0.32	0	0	0	0	0.52	0	1.04	0	0	0	0	0	1.08	0	0	0	0	0	0	0	0	0	0	0	0	0.17	0	0	0	0.2	0
Peak_393	1	20674824	20674826	-			OK	OK	0	0	0	0.04	0	0	0	0.14	0	0.16	0	0	0	0	0	0	0.13	0	0	0	0	0	1.08	0.18	0.3	0	0	0	0	0	0	0	0.27	0	0	0	0	0.41	0.76	0.8	0
Peak_394	1	20692568	20692580	-			OK	OK	0	0	0	0	0	0	0.32	0	0	0	0	0	0	0	0	0	0.13	0	0	0	0	0	0.54	0	0	0	0	0	0	0	0	0	0	1.48	0	0	0	0	0	0	0
Peak_395	1	20728815	20728826	-			OK	OK	0	0	0	0.08	0	0.38	0	0	0.64	0	0.17	0.68	0	0	0	0	0	0	0	0	0	0.36	1.35	0.36	0.9	0	0	0	0	0	0	0	0	1.48	0	0	0	0	0	0	0
Peak_396	1	20735099	20735148	-	ENSBTAG00000054337	High	OK	Likely_false	0.23	0.11	0.42	0.76	0	0.57	0.8	1.26	0	0.8	0.34	1.36	2.94	0.23	0.52	0.54	0	1.26	0	0	0	1.08	1.08	1.08	0.5	0	0.4	0	0.3	0.12	0	0	1.08	0	0.29	0	0	0	0.38	0.6	0
Peak_396	1	20735099	20735148	-	ENSBTAG00000053883	High	OK	Likely_false	0.23	0.11	0.42	0.76	0	0.57	0.8	1.26	0	0.8	0.34	1.36	2.94	0.23	0.52	0.54	0	1.26	0	0	0	1.08	1.08	1.08	0.5	0	0.4	0	0.3	0.12	0	0	1.08	0	0.29	0	0	0	0.38	0.6	0
Peak_397	1	20823807	20823877	-	ENSBTAG00000053883	High	OK	Likely_false	1.38	2.31	2.66	11.68	3.08	27.93	15.52	13.58	3.52	10.88	6.63	27.2	15.68	13.34	8.06	8.1	5.07	3.99	2	0.56	0.66	31.32	27.27	27.72	33.5	0.9	1.5	1.04	2.2	2.04	1.25	1.48	9.18	9.25	12.47	6.63	9.66	6.56	7.03	12.2	13.5
Peak_397	1	20823807	20823877	-	ENSBTAG00000054337	High	OK	Likely_false	1.38	2.31	2.66	11.68	3.08	27.93	15.52	13.58	3.52	10.88	6.63	27.2	15.68	13.34	8.06	8.1	5.07	3.99	2	0.56	0.66	31.32	27.27	27.72	33.5	0.9	1.5	1.04	2.2	2.04	1.25	1.48	9.18	9.25	12.47	6.63	9.66	6.56	7.03	12.2	13.5
Peak_398	1	20824073	20824182	-	ENSBTAG00000054337	Low	OK	Likely_false	1.15	0.44	0.98	1.8	0	1.33	0.8	1.96	0.96	2.4	2.38	2.04	2.45	0.69	0.26	1.08	0.13	0.84	0.25	0.14	0.88	0.72	0.81	0.99	0.4	0	0.5	0.26	0.1	0.72	0	0	2.16	0.74	0.87	0.85	0	0	0	0.4	0
Peak_398	1	20824073	20824182	-	ENSBTAG00000053883	High	OK	Likely_false	1.15	0.44	0.98	1.8	0	1.33	0.8	1.96	0.96	2.4	2.38	2.04	2.45	0.69	0.26	1.08	0.13	0.84	0.25	0.14	0.88	0.72	0.81	0.99	0.4	0	0.5	0.26	0.1	0.72	0	0	2.16	0.74	0.87	0.85	0	0	0	0.4	0
Peak_399	1	20886551	20886566	-			OK	OK	0.23	0	0	0.08	0	0	0	0.14	0	0.32	0	0	0	0	1.04	1.08	0.39	0	0.25	0	0	1.44	0.81	0.45	1.1	0	0	0	0	0	0	0	0	0	0	0	0	1.23	0	0	0
Peak_400	1	20915658	20915659	-			OK	OK	0	0	0	0	0	0	0	0	0	0	0	0	0	0	0	0	0	0	0	0	0	0	0	0	0	0	0	0	0	0	0	0	0	0	0	0	0	0	0	0	0
Peak_401	1	20969761	20969770	-	ENSBTAG00000054337	Low	OK	Likely_false	0	0	0	0	0	0	0.16	0	0	0	0	0	0	0	0	0	0.39	0	0	0	0	0.72	0	0.09	0.1	0	0	0	0	0	0	0	0	0.74	0.29	0	0	0	0	0	0.81
Peak_401	1	20969761	20969770	-	ENSBTAG00000053883	Low	OK	Likely_false	0	0	0	0	0	0	0.16	0	0	0	0	0	0	0	0	0	0.39	0	0	0	0	0.72	0	0.09	0.1	0	0	0	0	0	0	0	0	0.74	0.29	0	0	0	0	0	0.81
Peak_402	1	20972389	20972416	-	ENSBTAG00000053883	High	OK	Likely_false	0	0	0	0.04	0	0.19	0	0	0	0	0	0	0	0.46	0.26	0	0.39	0	0	0	0	4.68	0.27	2.25	3.4	0	0	0	0	0	0	0	0	0	0	0	0	0	0	0.2	0
Peak_402	1	20972389	20972416	-	ENSBTAG00000054337	Low	OK	Likely_false	0	0	0	0.04	0	0.19	0	0	0	0	0	0	0	0.46	0.26	0	0.39	0	0	0	0	4.68	0.27	2.25	3.4	0	0	0	0	0	0	0	0	0	0	0	0	0	0	0.2	0
Peak_403	1	20975156	20975167	-	ENSBTAG00000054337	Medium	OK	Likely_false	0	0	0.56	0.48	0	1.14	2.4	0	0.32	0.32	0	0	0	6.67	9.62	3.78	4.42	0	0	0	0	9	5.13	9.36	7.1	0.9	0.1	0	0.1	0.36	0.25	0.37	1.35	0	0	0	0	0	0	2	4.59
Peak_403	1	20975156	20975167	-	ENSBTAG00000053883	High	OK	Likely_false	0	0	0.56	0.48	0	1.14	2.4	0	0.32	0.32	0	0	0	6.67	9.62	3.78	4.42	0	0	0	0	9	5.13	9.36	7.1	0.9	0.1	0	0.1	0.36	0.25	0.37	1.35	0	0	0	0	0	0	2	4.59
Peak_404	1	20975377	20975393	-	ENSBTAG00000054337	Low	OK	Likely_false	0	0	0	0.12	0	0	0.16	0	0	0	0	0	0	0.92	0	0.54	0	0	0	0	0	3.96	1.89	3.06	1.6	0	0	0	0	0	0	0	0	0	0	0	0	0	0	0	0
Peak_404	1	20975377	20975393	-	ENSBTAG00000053883	Medium	OK	Likely_false	0	0	0	0.12	0	0	0.16	0	0	0	0	0	0	0.92	0	0.54	0	0	0	0	0	3.96	1.89	3.06	1.6	0	0	0	0	0	0	0	0	0	0	0	0	0	0	0	0
Peak_405	1	20975705	20975910	-	ENSBTAG00000053883	High	OK	Likely_false	0	0	0.56	0.64	0	0.76	1.6	0	0	0.48	0	0	0	1.61	2.6	5.4	1.95	0	0	0.14	0	29.88	18.09	24.84	17.6	0	0.3	0	0.1	0	0	0	0	0	0	0	0	0	0	2	1.89
Peak_405	1	20975705	20975910	-	ENSBTAG00000054337	High	OK	Likely_false	0	0	0.56	0.64	0	0.76	1.6	0	0	0.48	0	0	0	1.61	2.6	5.4	1.95	0	0	0.14	0	29.88	18.09	24.84	17.6	0	0.3	0	0.1	0	0	0	0	0	0	0	0	0	0	2	1.89
Peak_406	1	20991629	20991656	-			OK	OK	0	0	0	0	0	0	0	0	0	0	0	0	0	0	0	0	0	0	0	0	0	0	0	0	0	0	0	0	0	0	0	0	0	0	0	0	0	0	0	0	0
Peak_407	1	20991753	20991772	+			OK	OK	0	0	0	0	0	0	0	0	0	0	0	0	0	0	0	0	0	0	0	0	0	0	0	0	0	0	0	0	0	0	0	0	0	0	0	0	0	0	0	0	0
Peak_408	1	21049609	21049630	-	ENSBTAG00000053883	Low	OK	Likely_false	0	0	0	0.24	0	0	0.32	0	0	0	0	0	0	0	0	0	0	0	0	0	0	0	0	0.18	0	0	0.1	0	0	0	0.5	0	0	0	0	0	0	0	0	0	0
Peak_408	1	21049609	21049630	-	ENSBTAG00000054337	Low	OK	Likely_false	0	0	0	0.24	0	0	0.32	0	0	0	0	0	0	0	0	0	0	0	0	0	0	0	0	0.18	0	0	0.1	0	0	0	0.5	0	0	0	0	0	0	0	0	0	0
Peak_409	1	21054554	21054638	-	ENSBTAG00000054337	Medium	OK	Likely_false	0	0.77	0.42	1.96	0	8.55	4.32	2.1	0.32	1.28	0.34	1.36	2.94	0.69	0	0	0.39	0.63	1.5	0.14	1.1	1.08	0.54	0.63	0.2	0.45	0	1.3	0.2	0.24	0	0	4.32	1.11	1.16	0.51	0	0.82	0.57	0.4	0.81
Peak_409	1	21054554	21054638	-	ENSBTAG00000053883	Medium	OK	Likely_false	0	0.77	0.42	1.96	0	8.55	4.32	2.1	0.32	1.28	0.34	1.36	2.94	0.69	0	0	0.39	0.63	1.5	0.14	1.1	1.08	0.54	0.63	0.2	0.45	0	1.3	0.2	0.24	0	0	4.32	1.11	1.16	0.51	0	0.82	0.57	0.4	0.81
Peak_410	1	21183185	21183200	-			OK	OK	0	0.11	0.42	0	0	0	0	0	0.32	0	0	0	0	0	0	0	0	0	0	0	0	0	0	0	0	0	0	0	0.1	0	0	0	0	0	0	0	0	0	0	0	0
Peak_411	1	21188917	21188999	-	ENSBTAG00000019314	High	OK	OK	0	0	0	0.08	0	0	0	0	0	0	0	0	0	0.46	1.04	0.54	0	0	0	0	0	0	0	0	0	0	0	0	0	0	0	0	0	0.74	0	9.86	48.72	25.01	33.82	0	0
Peak_412	1	21198872	21198879	-			OK	OK	0	0.11	0	0	0	0	0	0	0	0	0	0	0.49	0	0	0	0	0	0	0	0	0	0	0.18	0	0	0	0	0	0	0	0	0	0	0.29	0	0	0	0	0	0
Peak_413	1	21211535	21211546	-			OK	OK	0	0	0	0.2	0	0	0	0	0	0	0.34	0	0	0	0	0	0	0	0	0	1.1	0	0	0	0	0	0	0.52	0	0	0	0	0	0	0	0	0	0	0	0	0
Peak_414	1	21214948	21214960	-			OK	OK	0	0	0	0.04	0	0.19	0	0	0	0	0	0	0	0.46	0	0	0	0	0	0	0.44	0.36	0	0	0.2	0	0.1	0	0	0	0	0	0	0.37	0	0.17	0	0	0	0.2	0
Peak_415	1	21224004	21224039	-	ENSBTAG00000019314	High	Low_H3K4me3	OK	0	0	0.42	0	0	0	0	0	0	0	0	0	0	0	0	0.54	0.13	0	0	0	0	0	0.27	0.09	0.4	0	0	0	0	0	0	0	1.35	1.48	0.87	0.17	0	0.82	0	0	1.08
Peak_416	1	21247102	21247114	-	ENSBTAG00000019314	Medium	OK	OK	0	0	0	0	0	0	0	0	0	0	0	0	0	1.61	0	0.54	0.78	0	0	0	0	0	0	0.63	0.2	0	0	0	0	0	0	0	0	0	0	0	0	0	0	0.8	1.35
Peak_417	1	21250284	21250300	-			OK	OK	0.46	0	0	0	0	0	0.16	0	0	0	0	0	0	0	0	0	0	0	0	0	0	0.36	0	0	0.1	0	0	0	0	0	0	0	0	0	0.29	0	0	0	0	0	0
Peak_418	1	21257727	21257745	-			OK	OK	0	0	0	0.04	0	0.38	0.32	0	0	0	0	0	0	0	0	0	0.13	0	0	0	0	0	0	0	0	0	0	0	0.4	0	0	0	0	0	0	0	0	0	0	0	0
Peak_419	1	21267061	21267136	-			OK	OK	0	0.33	0.42	0	0	0	0	0.42	0	0	0	0	0	0	0	0	0	0	0	0	0	0	0	0	0.2	0	0.5	0	0	0	0	0	0	0	0	0	0	0	0	0	0
Peak_420	1	21269623	21269633	-			OK	OK	0	0	0	0	0	0	0.16	0.56	0	0	0	0	0	0	0	0	0	0.21	0.25	0	0	0	0	0.27	0.2	0	0	0	0	0	0	0	0.54	0	0	0	0	0	0	0	0
Peak_421	1	21328096	21328187	-	ENSBTAG00000019314	High	OK	OK	2.07	0.99	1.96	1.56	0	3.42	3.36	2.38	0	3.68	1.87	5.44	9.8	3.91	2.6	2.7	2.47	0.42	1.75	1.54	2.42	5.04	2.16	3.33	3.3	2.25	2.1	4.16	0.8	1.08	0.5	0.37	4.32	0.37	1.16	1.53	1.68	2.46	3.8	2	4.32
Peak_422	1	21654672	21654684	+			OK	OK	0	0	0	0	0	0	0	0	0	0	0	0	0	0	0	0	0	0	0	0	0	0	0	0	0	0	0	0	0	0	0	0	0	0	0	0	0	0	0	0	0
Peak_423	1	21777680	21777692	+			OK	OK	0	0	0	0	0	0	0	0	0	0	0	1.36	0	0	0	1.62	0	0	0	0	0	0	0	0	0	0	0	0	0	0	0	0	0	0	0	0	0	0	0	0	0.81
Peak_424	1	21927620	21927632	+			OK	OK	0	0	0	0.2	0	0.19	0.32	0	0	0	0	1.36	1.47	0	0	0	0	0	0.5	0	0	0	0	0	0	0	0	0	0.1	0	0	0	0	0	0	0	0	0	0	0	0
Peak_425	1	22092942	22093069	+	ENSBTAG00000052575	High	OK	OK	0	0.66	0.28	3.48	0.28	6.27	2.72	1.82	1.92	2.72	12.07	27.2	16.66	4.83	2.6	7.02	2.47	1.47	0.75	0.56	1.76	7.92	6.48	5.58	6.7	1.35	1.2	3.9	0.8	0.24	0.75	0	7.56	7.77	11.31	0	0	0.82	0.19	0.4	0.81
Peak_425	1	22092942	22093069	+	ENSBTAG00000047293	Low	OK	OK	0	0.66	0.28	3.48	0.28	6.27	2.72	1.82	1.92	2.72	12.07	27.2	16.66	4.83	2.6	7.02	2.47	1.47	0.75	0.56	1.76	7.92	6.48	5.58	6.7	1.35	1.2	3.9	0.8	0.24	0.75	0	7.56	7.77	11.31	0	0	0.82	0.19	0.4	0.81
Peak_425	1	22092942	22093069	+	ENSBTAG00000054742	Low	OK	OK	0	0.66	0.28	3.48	0.28	6.27	2.72	1.82	1.92	2.72	12.07	27.2	16.66	4.83	2.6	7.02	2.47	1.47	0.75	0.56	1.76	7.92	6.48	5.58	6.7	1.35	1.2	3.9	0.8	0.24	0.75	0	7.56	7.77	11.31	0	0	0.82	0.19	0.4	0.81
Peak_426	1	22093817	22093851	-			OK	OK	0	0	0.14	0.36	0	0.38	0.32	0.14	0	0.32	1.19	0	1.47	0.23	0	0	0	0.21	0	0	0.22	0.36	0.27	0.9	0.7	0.9	0	0	0	0	0	0.74	0.54	0.74	0.29	0	0	0	0	0	0
Peak_427	1	22093974	22094120	+	ENSBTAG00000047293	Low	OK	OK	0.46	0.55	0.98	1	1.4	1.33	1.28	0.56	0.32	0.64	2.55	1.36	2.45	1.61	0	1.08	0.26	1.05	1.75	0.42	1.32	2.88	1.62	1.53	1.2	1.35	0.3	1.56	0.4	1.56	0	0	2.16	0.74	0.29	0.34	0.42	0.41	0	0.4	0.81
Peak_427	1	22093974	22094120	+	ENSBTAG00000052575	High	OK	OK	0.46	0.55	0.98	1	1.4	1.33	1.28	0.56	0.32	0.64	2.55	1.36	2.45	1.61	0	1.08	0.26	1.05	1.75	0.42	1.32	2.88	1.62	1.53	1.2	1.35	0.3	1.56	0.4	1.56	0	0	2.16	0.74	0.29	0.34	0.42	0.41	0	0.4	0.81
Peak_427	1	22093974	22094120	+	ENSBTAG00000054742	Low	OK	OK	0.46	0.55	0.98	1	1.4	1.33	1.28	0.56	0.32	0.64	2.55	1.36	2.45	1.61	0	1.08	0.26	1.05	1.75	0.42	1.32	2.88	1.62	1.53	1.2	1.35	0.3	1.56	0.4	1.56	0	0	2.16	0.74	0.29	0.34	0.42	0.41	0	0.4	0.81
Peak_428	1	22094435	22094497	+	ENSBTAG00000052575	High	OK	OK	0	0.11	0	0.68	0	1.71	0.32	0.14	0	0.32	0	4.08	1.47	0	0	0	0.39	0.21	1	0.28	0.88	0	0	0.54	0.1	0.9	0.3	0.78	0.2	0.48	0	0	0.54	0.74	0	0	0	0	0	0	0.54
Peak_428	1	22094435	22094497	+	ENSBTAG00000047293	Low	OK	OK	0	0.11	0	0.68	0	1.71	0.32	0.14	0	0.32	0	4.08	1.47	0	0	0	0.39	0.21	1	0.28	0.88	0	0	0.54	0.1	0.9	0.3	0.78	0.2	0.48	0	0	0.54	0.74	0	0	0	0	0	0	0.54
Peak_429	1	22094742	22094770	+	ENSBTAG00000052575	High	OK	OK	0	0.22	0.14	0.56	0	0.76	0.64	0.14	0	0	0.34	0	0	0	0	0.54	0.13	0	0	0.14	0.88	0	0	0.09	0	0	0.2	0.52	0.1	0	0	0	0	0	0	0	0	0	0	0	0
Peak_429	1	22094742	22094770	+	ENSBTAG00000054742	Low	OK	OK	0	0.22	0.14	0.56	0	0.76	0.64	0.14	0	0	0.34	0	0	0	0	0.54	0.13	0	0	0.14	0.88	0	0	0.09	0	0	0.2	0.52	0.1	0	0	0	0	0	0	0	0	0	0	0	0
Peak_429	1	22094742	22094770	+	ENSBTAG00000047293	Low	OK	OK	0	0.22	0.14	0.56	0	0.76	0.64	0.14	0	0	0.34	0	0	0	0	0.54	0.13	0	0	0.14	0.88	0	0	0.09	0	0	0.2	0.52	0.1	0	0	0	0	0	0	0	0	0	0	0	0
Peak_430	1	22095345	22095380	-			OK	OK	0	0	0	0.16	0	0.38	0	0	0	0	0	0	0	0	0	0	0	0	0.5	0	0.44	0	0	0	0	0	0.2	0	0.5	0	0	0	0	0	0	0	0	0	0	0	0
Peak_431	1	22097955	22097983	+			OK	OK	0	0	0	0.68	0	2.09	0.16	0	0	0.48	1.36	2.04	0	0.23	0	0	0.26	0	2.75	0.56	0	0	0	0.45	0.4	0	0.2	1.82	0	0	0.75	0	0	0	0.58	0.17	0	0	0	0	0
Peak_432	1	22112612	22112640	+	ENSBTAG00000052575	Medium	OK	OK	0.23	0	0.14	0.16	0	0	0.32	0.14	0.32	0.32	0.17	0	0	0	0	0	0.26	1.05	0	0.14	0.88	0	0	0.63	0.3	0.45	0.3	0.52	0	0.24	0	0	0	0	0.87	0	0	0.82	0	0	0
Peak_433	1	22121378	22121388	+			OK	OK	0	0	0.14	0.04	0	0	0	0	0	0	0	0	0	0	0	0	0	0	0	0.14	0	0	0	0	0.2	0.45	0.3	0	0	0.36	0	0	0	0.74	0	0	0	0	0.57	0	0
Peak_434	1	22125990	22126015	+			OK	OK	0	0	0.14	0	0	0	0	0	0	0.16	0.17	0	0	0	0	0	0	0	0	0.14	0.88	0	0	0	0.1	0	0.7	0.26	0	0	0.25	0	0	0	0	0	0	0	0	0	0
Peak_435	1	22127965	22127966	+			OK	OK	0	0	0	0	0	0	0	0	0	0	0	0	0	0	0	0	0	0	0	0	0	0	0	0	0	0	0	0	0	0	0	0	0	0	0	0	0	0	0	0	0
Peak_436	1	22148813	22148825	+			OK	OK	0	0	0	0.04	0	0	0	0.14	0.96	0.16	0	0	0.49	0	0	0	0	0	0	0	0.44	0	0	0	0	0	0	0	0	0	0.25	0	0	0	0	0	0	0	0	0	0
Peak_437	1	22168187	22168199	+			OK	OK	0	0	0	0.04	0	0	0	0	0	0	0	0	0	0.23	0	0	0	0.21	0	0	0	0	0	0.27	0	0	0	0	0	0.12	0	0	0	0	0	0	0	0	0	0	0
Peak_438	1	22172202	22172212	+	ENSBTAG00000052575	Low	OK	OK	0	0	0.28	0.04	0	0	0	0	0	0	0	0	0	0	0	0	0	0	0	0.14	0	0	0	0	0	0	0.4	0.26	0	0	0.5	0	0	0	0	0	0	0	0.19	0	0
Peak_439	1	22195010	22195011	+			OK	OK	0	0.11	0	0	0	0	0	0	0.64	0	0	0	0	0	0	0	0	0	0	0.28	0.44	0	0	0	0	0	0	0	0	0	0	0	0	0	0	0	0	0	0	0	0
Peak_440	1	22271669	22271680	+	ENSBTAG00000054742	Medium	OK	OK	0	0	0	0	0	0	0	0	0	0	0	0	0	0	0	0	0	0.21	0.5	0	0.66	0	0	0	0	0	0.4	0	0	0	0	0	0	0	0	0	0	0	0	0	0
Peak_441	1	22279349	22279372	+	ENSBTAG00000054742	High	OK	OK	0	0	0	0	0	0	0	0	0	0	0	0	0	0	0	0	0	0	0	0	0	0	0	0	0	0	0	0	0	0	0	0	0	0	0	0	0	0	0	0	0
Peak_442	1	22281497	22281509	+	ENSBTAG00000054742	High	OK	OK	0	0	0	0	0	0	0	0	0	0	0	0	0	0	0	0	0	0	0	0	0	0	0	0	0	0	0	0	0	0	0	0	0	0	0	0	0	0	0	0	0
Peak_443	1	22292081	22292099	+	ENSBTAG00000054742	High	OK	OK	0	0	0.42	0	0	0	0.16	0	0	0	0	0	0	0	0	0	0	0.84	0	0	0	0	0	0	0	0	0.4	0	0.3	0	0	1.48	0	0	0	0	0	0	0	0	0
Peak_444	1	22510542	22510586	+			OK	OK	0.69	0.44	0.7	6.36	3.64	11.02	3.52	0.14	0	0	0.34	0	0	0	0	0	0	0.42	0	0	0	0	0	0	0.3	0	0.3	0.52	0	0.24	0	0	0	0	0	0	0	0	0	0.4	0
Peak_445	1	22576920	22577089	+	ENSBTAG00000002623	Low	OK	OK	0	0	0.14	0	0	0	0	0.14	0	0	0	0	0	0	0	0	0	0.21	0	0	0.44	0	0	0	0	0	0.2	0	0.7	0	0	1.11	0.27	0	0	0	0	0	0	0	0
Peak_446	1	22579104	22579110	-			OK	OK	0	0	0	0	0	0.38	0	0	0	0	0	0	0	0	0	0	0	0	0	0	0.22	0	0	0	0	0	0	0	0.3	0	0.25	0	0	0	0	0	0	0	0	0	0
Peak_447	1	22617432	22617543	+	ENSBTAG00000002623	High	OK	OK	3.45	2.64	5.74	5.96	1.68	15.01	19.84	6.72	2.24	3.84	6.46	11.56	5.39	3.68	0.52	2.7	0.13	24.15	20.25	2.94	26.4	0.72	1.89	6.66	0.8	33.75	19.3	30.16	19.6	6.84	3.75	4.81	4.86	4.07	3.48	4.42	8.4	4.1	2.09	2.4	3.51
Peak_448	1	22639264	22639330	+	ENSBTAG00000002623	High	OK	OK	0.23	0	0	0	0	0	0	0	0	0	0	0	0	0	0	0	0	0.21	0	0	0	0	0	0	0	0.45	0.3	0.78	0	0.12	0	0.74	0	0	0	0	0	0	0	0	0
Peak_449	1	22658873	22658885	+			OK	OK	0	0	0	0	0	0	0	0	0	0	0	0	0	0	0	0	0	0	0	0	0	0	0	0	0	0	0.1	0	0	0	0	0	0	0	0	0	0	0	0	0	0
Peak_450	1	22783717	22783730	-			OK	OK	0	0	0	0	0	0	0	0	0	0	0	0	0	0.23	0	0	0	0	0	0	0	0	0	0	0.1	0.45	0	0	0	0	0	0	0	0	0	0	0	0	0	0.6	0
Peak_451	1	22783867	22783956	+	ENSBTAG00000012908	High	OK	OK	5.98	21.01	1.54	27.84	8.4	5.7	29.6	3.08	9.92	6.24	23.46	4.08	14.7	52.67	34.58	84.24	60.19	16.17	6.5	7.7	37.62	126	102.87	54.54	94.7	11.25	10.9	31.46	31.2	18.6	3.25	0.37	27.81	8.51	12.18	3.74	7.56	15.58	3.04	7.6	34.02
Peak_452	1	22906429	22906540	-	ENSBTAG00000054574	High	OK	OK	0.46	0.11	0.28	0.56	0	0.38	0.48	0	0	0	0	2.04	0.49	2.76	2.86	0.54	1.56	0.21	1.5	0.7	1.54	1.8	3.78	0.99	3.2	0	0.3	0	0.2	0.84	0.5	0	1.62	0	0	0.17	0	0	0	6.4	12.15
Peak_453	1	22966650	22966667	+	ENSBTAG00000038512	Medium	OK	OK	0	0	0.14	0	0	0	0	0	0	0	0	0	0	0.46	0	0	0	0	0	0	0	0.36	0	0	0.6	0	0	0	0	0	0	0	0	0	0	0	0	0	0	0.4	0
Peak_454	1	22966802	22966883	-	ENSBTAG00000034347	High	OK	OK	0.69	0.55	0.42	1	0.28	2.28	1.92	1.26	0.96	1.76	1.87	2.72	1.96	9.89	3.9	6.48	5.85	0.21	1	0.28	0.66	9.36	8.64	9.72	14.5	0	0.3	1.04	0.6	0.96	0	0.74	2.16	1.11	1.16	0.68	0.42	0.82	0.38	1.8	0.81
Peak_455	1	23043350	23043376	+			OK	OK	0	0.66	0	0.16	0	0.38	0.16	0.28	0	0.16	0	1.36	0.49	0.23	0.26	0	0	0.21	1	0.42	0.44	0	0.81	0.63	0.5	0.45	0.2	0.52	0.5	0.12	0	0	0	0	0	0	0	0	0	0	0
Peak_456	1	23167922	23168001	+	ENSBTAG00000048578	High	OK	OK	0	0	0	0	0	0	0	0	0	0	0	0	0	8.28	2.34	12.42	5.72	0	0	0	0	0	0	0	0.3	0	0	0	0	0.12	0	0	0	0	0	0	0	0	0	0.2	0
Peak_457	1	23591063	23591071	+			OK	OK	0	0	0	0	0	0	0	0	0	0	0	0	0	0	0	0	0	0	0	0	0	0	0	0	0	0	0	0	0	0	0	0	0	0	0	0	0	0	0	0	0
Peak_458	1	23655908	23655924	+			OK	OK	0	0.11	0	0	0	0	0	0	0	0	0	0	0	1.15	0.78	0	0.78	0	0	0	0	0.72	0	0	0	0	0	0	0	0	0	0	0	0	0	0	0	0	0	0.2	0.54
Peak_459	1	23800787	23800814	+			OK	OK	0	0	0	0	0	0	0	0	0	0	0	0	0	4.37	6.76	1.62	0.78	0	0	0	0	1.8	0	0	0	0	0	0	0	0	0	0	0	0	0	0	0	0	0	0	0
Peak_460	1	24118240	24118242	+			OK	OK	0	0	0	0	0	0	0	0	0	0	0	0	0	0.69	0	2.7	1.04	0	0	0	0	0	0	0.18	0.4	0	0	0	0	0	0	0	0	0	0	0	0	0	0	0.4	0
Peak_461	1	24411545	24411605	+	ENSBTAG00000010462	Low	OK	OK	0	0	0	0	0	0	0	0	0	0	0	0	0	0.23	0.26	1.08	0.26	0	0	0	0	0.36	1.35	0	1.5	0	0.2	0	0	0	0	0	0	0	0	0	0	0	0	0	0
Peak_461	1	24411545	24411605	+	ENSBTAG00000046755	Low	OK	OK	0	0	0	0	0	0	0	0	0	0	0	0	0	0.23	0.26	1.08	0.26	0	0	0	0	0.36	1.35	0	1.5	0	0.2	0	0	0	0	0	0	0	0	0	0	0	0	0	0
Peak_462	1	24412806	24413193	+	ENSBTAG00000046755	Medium	OK	OK	1.38	2.31	3.5	1.32	0.56	0	3.68	7.28	1.28	3.04	2.38	0.68	8.33	5.75	4.42	8.1	2.99	5.67	5.75	4.06	5.94	13.32	5.94	6.48	14.3	4.5	6.3	5.72	0.9	3.12	2	0.74	6.75	1.85	0.29	2.38	6.3	6.56	3.04	1.2	2.97
Peak_462	1	24412806	24413193	+	ENSBTAG00000010462	Low	OK	OK	1.38	2.31	3.5	1.32	0.56	0	3.68	7.28	1.28	3.04	2.38	0.68	8.33	5.75	4.42	8.1	2.99	5.67	5.75	4.06	5.94	13.32	5.94	6.48	14.3	4.5	6.3	5.72	0.9	3.12	2	0.74	6.75	1.85	0.29	2.38	6.3	6.56	3.04	1.2	2.97
Peak_463	1	24523081	24523094	+			OK	OK	0	0	0	0	0	0	0	0.14	0	0.16	0	0	0	0.46	0	0	0.13	0	0	0	0	0	0	0.09	0.1	0.45	0	0	0	0	0	0	0	0	0	0	0	0	0	0	0
Peak_464	1	24527180	24527203	+	ENSBTAG00000010462	Medium	OK	OK	0	0	0	0	0	0	0	0	0	0	0	0	0	0	0	0	0	0	0	0	0	0	0	0	0	0	0	0	0	0	0	0	0	0	0	0	0	0	0	0	0
Peak_465	1	24551826	24551849	+			OK	OK	0	0.55	0	0	0	0	0	0	0	0	0	0	0	0	0	0	0	0	0	0	0	0	0	0	0	0	0	0	0	0	0	0	0	0	0	0	0	0	0	0	0
Peak_466	1	24574697	24574721	+			OK	OK	0	0	0	0	0	0	0	0.98	0	0	0	0	0	0	0	0	0	0.21	0	0.28	0	0	0	0	0.3	0	0	0	0	0	0	0	0	0	0	0	0	0	0	0	0
Peak_467	1	24606041	24606067	+			OK	OK	0	0	0	0	0	0	0	0.56	0	0	0	0	0	0	0	1.08	0	0	0	0	0	0	0	0	0	0	0	0	0.4	0	0	0	0	0	0	0	0	0	0	0	0
Peak_468	1	24662675	24662676	+			OK	OK	0	0	0	0	0	0	0	0	0	0	0	0	0	0	0	0.54	0	0	0	0	0	0	0	0	0	0	0	0	0	0	0	0	0	0	0	0	0	0.41	0	0	0
Peak_469	1	24707252	24707282	-			OK	OK	0	0	0	0	0	0	0	0	0	0	0	0	0	0	0	0	0	0	0	0	0	0	0	0	0	0	0	0	0	0	0	0	0	0	0	0	0	0	0	0	0
Peak_470	1	24707310	24707358	+	ENSBTAG00000010462	High	OK	OK	0	0	0	0	0	0	0	0	0	0	0	0	0	0	0	1.08	0	0	0	0	0	0	0	0	0	0	0	0	0	0	0	0	0	0	0	0	0	0	0	0	0
Peak_471	1	24737008	24737028	+			OK	OK	0	0	0	0	0	0	0	0	0	0.32	0	0	0	0	0	0	0	0	0	0	0	0	0	0	0.2	0	0	0	0	0	0	0	0	0	0	0	0	0	0	0	0.54
Peak_472	1	24742426	24742427	+			OK	OK	0	0	0	0	0	0	0	0	0	0	0.17	0	0	0	0	1.62	0	0	0	0	0	0	0	0	0.1	0	0	0	0	0	0	0	0	0	0	0	0	0	0	0	0
Peak_473	1	24789551	24789571	+			OK	OK	0	0	0	0	0	0	0	0	0	0	0	0	0	0	0	0	0	0	0	0	0	0	0	0	0	0	0.3	0	0	0	0	0	0	0	0	0	0	0	0	0	0
Peak_474	1	24815354	24815356	+			OK	OK	0	0	0	0.04	0	0	0.32	0	0	0	0	0	0	0	0	0	0	0	0	0	0	0	0	0	0.4	0	0	0	0	0	0	0	0	0	0	0	0	0	0.38	0	0
Peak_475	1	25001228	25001230	+	ENSBTAG00000010462	Medium	OK	OK	0	0	0	0.08	0	0	0	0	0	0	0	0	0	0	0	0	0.13	0	0	0	0	0	0	0	0.1	0	0	0	0	0	0	0	0	0	0	0.17	1.26	0	0	0	0
Peak_476	1	25044800	25044814	+			OK	OK	0	0	0	0	0	0	0	0	0	0	0	0	0	0	0	0	0.13	0.42	0	0	0	0	0	0	0.2	0	0	0	0	0	0	0	0	0	0	0	0	0	0	0	0
Peak_477	1	25063419	25063420	+	ENSBTAG00000010462	Medium	Low_H3K4me3	OK	0	0	0	0	0	0	0	0	0	0	0	0	0	0	0	0.54	0.39	0	0	0	0.22	0	0	0	0.2	0	0.1	0	0	0	0	0	0	0	0	0	0	0	0	0.2	0
Peak_478	1	25422671	25422792	+			OK	OK	0	0	0	0	0	0	0	0	0	0	0	0	0	0	0	0	0	0	0	0	0	0	0	0	0	0	0	0	0	0	0	0	0	0	0	0	0	0	0	0	0
Peak_479	1	25430026	25430035	-			OK	OK	0	0	0	0	0	0	0	0	0	0	0	0	0	0	0	0	0	0	0	0	0	0	0	0	0	0	0	0	0	0	0	0	0	0	0	0	0	0	0	0	0
Peak_480	1	25485980	25485993	+			OK	OK	0	0	0	0	0	0	0	0	0	0	0	0	0	0	0	0	0	0	0	0	0	0	0	0	0	0	0	0	0	0	0	0	0	0	0	0	0	0	0	0	0
Peak_481	1	25507476	25507598	+			OK	OK	0	0	0	0	0	0	0	0	0	0	0	0	0	0	0	0	0	0	0	0	0	0	0	0	0	0	0.1	0	0	0	0	0	0	0	0	0	0	0	0	0	1.08
Peak_482	1	25774597	25774612	-			OK	OK	0	0	0	0	0	0	0	0	0	0	0	0	0	0	0	0	0	0	0	0	0	0	0	0	0	0	0	0	0	0	0	0	0	0	0	0	0	0	0	0	0
Peak_483	1	26117165	26117182	-	ENSBTAG00000009851	High	OK	OK	0	0	0.14	0	0	0	0.32	0	0	0	0	0	0	0	0	0	0	0	1	0	0	0	0	0	0	0	0.3	0	0	0	0.25	0	0	0	0	0	0	0	0	0.6	1.08
Peak_484	1	26117350	26117356	-	ENSBTAG00000009851	High	OK	OK	0	0	0	0	0	0	0	0	0	0	0	0	0	0	0	0	0	0	0	0	0	0	0	0	0	0	0	0	0	0	0.25	0	0	0	0	0	0	0	0	0	0
Peak_485	1	26139167	26139182	-	ENSBTAG00000009851	Medium	OK	OK	0	0	0	0.12	0	0	0	0	0	0	0	0	0	0	0	0	0.26	0	0	0	0	0	0	0.09	0	0	0	0	0	0	0	0	0	0	0	0	0	0	0	0.4	0.27
Peak_486	1	26152669	26152670	-	ENSBTAG00000009851	High	OK	OK	0	0	0	0.12	0	0	0	0	0	0	0	0	0	0	0	0	0	0	0	0	0	0.72	0	0	0.1	0.45	0	0	0	0	0	0	0	0	0	0	0	0	0	0.2	0
Peak_487	1	26177813	26177827	-	ENSBTAG00000009851	Medium	OK	OK	0	0	0	0.04	0	0	0	0	0	0	0	0	0	0	0	0	0.26	0.21	0	0	0.44	0.36	0	0	0	0	0	0	0	0	0	0	0	0	0	0	0	0	0	0	0
Peak_488	1	26195123	26195134	-			OK	OK	0	0	0	0	0	0	0	0	0	0	0	0	0	0	0	0	0	0	0	0	0	0	0	0	0	0	0	0.26	0	0	0	0	0	0	0	0	0	0	0	0	0
Peak_489	1	26330059	26330060	-			OK	OK	0	0	0	0.16	0	0.19	0	0	0	0	0.17	0	0	0.69	0	0	0	0	0	0	0	0	0	0	0.2	0	0	0.52	0	0	0	0	0.54	0	0	0	0	0	0	0	0
Peak_490	1	26368144	26368163	-			OK	OK	0	0.11	0	0	0	0	0	0	0	0	0	0	0	0	0	0	0	0	0	0.14	0	0	0	0.63	0.1	0	0.1	0	0	0	0	0	0	0	0	0	0	0	0	0	0
Peak_491	1	26416821	26416835	-			OK	OK	0	0	0	0	0	0.19	0	0	0	0	0	0	0	0	0	0	0	0	0	0	0.44	0	0.27	0.18	0	0	0.1	0	0	0	0	0	0	1.85	0	0	0	0	0	0	0
Peak_492	1	26477388	26477403	-			OK	OK	0	0	0	0	0	0	0	0	0	0	0	0	0	0	0	0	0	0	0	0	0	0	0	0	0	0	0	0	0	0	0.5	0	0	0	0	0	0	0	0	0	0
Peak_493	1	26580119	26580127	-			OK	OK	0	0	0	0	0	0	0	0	0	0	0	0	0	0	0	0	0	0	0	0	0	0	0	0	0	0	0	0.78	0	0	0	0	0	0	0	0	0	0	0	0	0
Peak_494	1	26582800	26582824	-			OK	OK	0	0	0	0.08	0	0	0.32	0	0	0	0	0	0	0	0	0.54	0.26	0	0	0	0	0	0	0.18	0	0	0	0	0	0	0	0	0	0.37	0	0	0.42	0	0	0.2	0
Peak_495	1	26583481	26583494	-	ENSBTAG00000009851	Low	OK	OK	0	0	0	0.52	0	2.28	0	0	0	0.32	0.17	0	1.47	0	0.78	1.08	0.39	0	0	0.28	0	0	0.54	0.54	0.5	0	0.3	0	0	0	0	0	0.27	0	0	0.34	0.42	0	0	0.2	0
Peak_496	1	26584104	26584279	-	ENSBTAG00000009851	Medium	OK	OK	0.69	0.66	0.98	2.56	1.68	2.28	3.04	0.56	0.32	2.72	4.93	1.36	4.41	0.92	2.08	4.86	1.43	1.68	1.25	2.66	3.96	3.6	0	6.21	2.9	0.45	1.6	1.56	0.8	0.24	0.5	0.37	1.89	2.96	3.48	1.87	1.26	1.23	1.14	3.2	2.7
Peak_497	1	27053552	27053574	+			OK	OK	0	0	0	0	0	0	0	0	0	0	0	0	0	0.92	0.26	1.08	0.52	0	0	0	0	0.36	0	0.27	0.8	0	0	0	0	0	0	0	0	0	0	0.17	0	0	0	0	0
Peak_498	1	27054133	27054147	-			OK	OK	0	0	0	0	0	0	0	0	0	0	0	0	0	0	0	0.54	0.91	0.21	0	0	0	2.16	0	0	0.6	0	0.1	0	0	0	0	0	0	0	0	0	0	0	0	0	0
Peak_499	1	27171353	27171367	-			OK	OK	0	0.11	0	0	0	0	0	0	0	0	0	0	0.98	0.23	0	0	0.13	0	0	0	0	0	0	0	0.6	0	0	0	0	0	0	0	0	0	0	0	0	0	0	0	0
Peak_500	1	27171604	27171617	-			OK	OK	0.23	0	0	0	0	0	0	0	0	0	0	0	0	0.23	0	0	0	0	0.75	0	0	0	0	0	0	0	0	0	0	0	0	0	0	0	0	0	0	0	0	0	0
Peak_501	1	27412444	27412579	-			OK	OK	0.23	0.22	0.14	0	0	0	0	0.28	0	0	1.19	0.68	0	5.06	11.18	7.56	5.07	0.42	0	0.42	0.44	6.12	0.81	3.96	4.3	0	2.5	2.86	0.1	0	0.5	0	0	0	0	0	0	0	0	9	6.21
Peak_502	1	27956286	27956340	+			OK	OK	0	0	0	0	0	0	0	0	0	0	0	0	0	0	0	0	0	0	0	0	0	0	0	0	0	0	0	0	0	0	0	0	0	0	0	0	0	0	0	0	0
Peak_503	1	28172711	28172727	+			OK	OK	0	0	0	0	0	0	0	0	0	0	0	0	0	0	0	0	0	0	0	0	0	0	0	0	0	0	0	0	0	0	0	0	0	0	0	0	0	0	0	0	0
Peak_504	1	28450911	28450926	-			OK	OK	0	0	0	0	0	0	0	0	0	0	0	0	0	0	0	0	0	0	0	0	0	0	0	0	0	0	0	0	0	0	0	0	0	0	0	0	0	0	0	0	0
Peak_505	1	28450935	28450960	+			OK	OK	0	0	0	0	0	0	0	0	0	0	0	0	0	0	0	0	0	0	0	0	0	0	0	0	0	0	0	0	0	0	0	0	0	0	0	0	0	0	0	0	0
Peak_506	1	29003704	29003740	+			OK	OK	0	0	0	0	0	0	0	0	0	0	0	0	0	0	0	0	0	0	0	0	0	0	0	0	0	0	0	0	0	0	0	0	0	0	0	0	0	0	0	0	0
Peak_507	1	29027447	29027464	-			OK	OK	0	0	0	0	0	0	0	0	0	0	0	0	0	0	0	0	0	0	0	0	0	0	0	0	0	0	0	0	0	0	0	0	0	0	0	1.53	2.1	5.74	1.33	0	0
Peak_508	1	29137513	29137524	-			OK	OK	0	0	0	0	0	0	0	0	0	0	0.17	0	0	0	0	0	0	0	0	0	0	0	0	0	0.1	0	0.1	0	0.1	0	0.25	0	0	0	0	0	0	0.82	0	0	0
Peak_509	1	29159014	29159055	+			OK	OK	0	0	0	0	0	0	0	0	0	0	0	0	0	0	0	0	0	0	0	0	0	0	0	0	0	0	0	0	0	0	0	0	0	0	0	0	0	0	0	0	0
Peak_510	1	29211661	29211671	-	ENSBTAG00000036262	Medium	OK	OK	0	0	0	0.04	0	0	0	0.14	0	0	0	0	1.47	0	0.78	0	0	0	0	0	0	0.72	0	0	0.1	0	0	0	0	0	0	0	0	0	0	0	0	0	0	0	0
Peak_511	1	29276686	29276687	-			OK	OK	0	0	0	0	0	0	0	0	0	0	0	0	0	0	0	0	0	0	0	0	0	0	0	0	0	0	0	0	0	0	0	0	0	0	0	0	0	0	0	0	0
Peak_512	1	29351787	29351798	-	ENSBTAG00000036262	Low	OK	OK	0	0	0	0.04	0	0	0.32	0	0	0	0	0	0.49	0	0	0	0	0.42	0	0	0.22	0	0.27	0	0.5	0	0.1	0	0	0	0	0	0.27	0	0	0.17	0	0	0.76	0.2	0
Peak_513	1	29353222	29353384	-	ENSBTAG00000036262	High	OK	OK	0	0	0	0.08	1.12	0	0	0	0	0	0	0	0	0	0	0	0	0	0	0	0	12.96	9.72	12.96	11.9	0	0.5	0	0	0	0	0	0	0	0	0	0	0	0.57	0	0
Peak_514	1	29386408	29386421	-			OK	OK	0	0	0	0	1.12	0	0	0	0	0	0	0	0	0	0	0	0	0	0	0	0	0	0	0	0	0.45	0	0	0	0	0	0	0	0	0	0.34	0	0	0	0	0
Peak_515	1	29403354	29403378	-	ENSBTAG00000036262	High	OK	OK	0	0	0	0.08	0	0	0	0	0	0	0	0	0	0	0	0	0.13	0	0	0	0	0.36	0	0	0.3	0	0	0	0	0	0	0	5.4	0.37	4.35	0	0	0	0	0	0
Peak_516	1	29418337	29418450	-			OK	OK	0	0.33	0.7	0.12	1.68	0	0.32	0	0	0	0	0	0.49	2.07	2.34	0.54	1.3	0	0	0.14	0	11.16	13.5	9.18	6.6	0	0	0	0	0	0	0	0	0	0.87	0.51	3.78	0	0.57	0.2	4.32
Peak_517	1	29418568	29418588	+			OK	OK	0	0	0	0	0	0	0.16	0	0	0	0	0	0	0	0.26	0	0	0	0	0	0	0.72	0.54	0.09	0.1	0	0	0	0	0	0	0	0	0	0	0	0	1.64	0	0	0
Peak_518	1	29418741	29418997	-	ENSBTAG00000036262	High	OK	OK	6.21	10.89	16.66	39.4	29.68	29.64	18.24	14.42	5.44	18.4	45.9	72.08	38.22	38.18	22.62	53.46	14.95	15.54	17	11.2	16.28	28.44	19.44	34.65	23.2	18.9	19.6	20.02	5	5.04	4	4.81	37.26	39.59	48.14	21.76	23.94	27.88	28.12	3.8	9.18
Peak_519	1	29552187	29552196	+			OK	OK	0	0	0	0	0	0	0	0	0	0	0	0	0	0	0	0	0	0	0	0	0	0	0	0	0	0	0	0	0	0	0	0	0	0	0	0	0	0	0	0	0
Peak_520	1	29697807	29697833	+			OK	OK	0	0	0	0	0	0	0	0	0	0	0	0	0	0	0	0	0	0	0	0	0	0	0	0	0	0	0	0	0	0	0	0	0	0	0	0	0	0	0	0	0
Peak_521	1	29726776	29726779	+			OK	OK	0	0	0	0	0	0	0	0	0	0	0	0	0	0	0	0	0	0	0	0	0	0	0	0	0	0	0	0	0	0	0	0	0	0	0	0	0	0	0	0	0
Peak_522	1	32482126	32482162	-			OK	OK	0	0	0	0	0	0	0	0	0	0	0	0	0	0	0	0	0	0	0	0	0	0	0	0	0	0	0	0	0	0	0	0	0	0	0	0	0	0	0	0	0
Peak_523	1	32826934	32827213	+	ENSBTAG00000009219	High	OK	OK	0.23	0.44	0.42	0.16	0	0.19	0.96	0.84	0.64	0.8	0.68	0	0	471.5	255.32	314.82	140.79	1.47	0.25	1.68	2.64	541.44	328.05	658.62	436.7	0.45	0.4	0	1	0.24	0.25	0.37	1.62	0.37	0	13.09	13.44	18.04	18.24	27.6	44.28
Peak_524	1	32870375	32870378	+			OK	OK	0	0	0	0	0	0	0.32	0	0	0	0	0	0	0.46	0	1.08	0.13	0	0	0	0	0	0.81	0.72	0.9	0	0	0	0	0	0	0	0	0	0	0	0	1.23	0	0.4	0
Peak_525	1	32904462	32904469	+			OK	OK	0	0	0	0	0	0	0.32	0	0.64	0	0	0	0	0	1.56	0	0	0	0	0	0	0	0	0.18	1.1	0	0	0	0	0	0	0	0	0	0	0	0	0	0	0	0
Peak_526	1	32911523	32911552	+			OK	OK	0	0	0	0	0	0	0	0	0	0	0.17	0	0	0.46	0.26	2.16	0	0	0.25	0	0	1.08	0	1.35	1	0	0	0	0	0	0	0	0	0	0	0.17	0	0	0	0	0
Peak_527	1	33004932	33004937	+			OK	OK	0	0	0	0	0	0	0	0	0	0	0	0	0	0	1.04	0	0.13	0	0	0	0	0	0	0.45	1.5	0	0	0	0	0	0	0	0	0	0	0.17	0	0.41	0.19	0.4	0
Peak_528	1	33005464	33005474	+			OK	OK	0	0.22	0	0	0	0	0	0.14	0	0	0	0	0	1.15	0	4.86	0.39	0	0	0	0	2.88	1.62	0.63	0.9	0	0	0	0	0	0	0	0	0	0	0	0	0	0.38	0.6	0.27
Peak_529	1	33023762	33023767	+			OK	OK	0	0	0	0	0	0	0	0	0	0	0	0	0	0	0	0	1.04	0	0	0	0	0.72	1.62	0.45	1.9	0	0	0	0	0	0	0	0	0	0	0.68	0	0	0	0	0
Peak_530	1	33108372	33108383	+			OK	OK	0	0	0	0	0	0	0	0	0	0	0	0	0	0.46	0.52	0	0.65	0	0	0	0	1.44	0.81	0.09	1.4	0	0	0	0	0	0	0	0	0	0	0	0	0	0.76	0.2	0.27
Peak_531	1	33169560	33169563	+			OK	OK	0	0	0	0	0	0	0	0	0	0	0	0	0	0.69	0	1.08	0.13	0	0	0	0	0	1.89	0	1.2	0	0	0	0	0	0	0	0	0	0	0.51	0	0	0	0	0
Peak_532	1	33186311	33186319	+			OK	OK	0	0	0	0	0	0	0	0.28	0	0	0	0	0	1.15	2.08	1.08	0.52	0.21	0	0	0	0	0	0.18	0.9	0	0	0	0	0	0	0	0	0	0	0	0	0	0.38	0	0
Peak_533	1	33186389	33186404	+			OK	OK	0	0	0	0	0	0	0	0	0	0.16	0	0	0	0	0.26	0	0.39	0	0	0	0	0	0	0.81	0.9	0	0	0	0	0	0	0	0	0	0	0	0	0	0	0	0
Peak_534	1	33195059	33195060	+			OK	OK	0	0	0	0	0	0	0	0	0	0	0	0	0	0	0	0	0.13	0	0	0	0	0.72	0	1.89	0.5	0	0	0	0	0	0	0	0	0	0	0	0	0	0	0	0
Peak_535	1	33198727	33198729	+			OK	OK	0	0	0	0	0	0	0	0.28	0	0.16	0	0	0	0.23	0	0	0.26	0	0	0	0	0.36	2.43	0.09	2.3	0	0	0	0	0	0	0	0	0	0	0	0	0	0	1.2	0.54
Peak_536	1	33226453	33226464	+			OK	OK	0	0	0	0	0	0	0	0	0	0	0	0	0	0.69	1.56	1.08	0.26	0	0	0	0	0	0.54	0.45	1.7	0	0	0	0	0	0	0	0	0	0	0	0	0.41	0	0	0
Peak_537	1	33253728	33253740	+			OK	OK	0	0	0	0	0	0	0	0	0	0	0	0	0	0.23	0.52	0.54	0.13	0	0	0	0	0	0	0.09	0.8	0	0	0	0	0	0	0.37	0	0	0	0.17	0	0	1.14	0	0
Peak_538	1	33259905	33259921	+			OK	OK	0	0	0	0	0	0	0	0	0	0	0	0	0	0	0	1.08	1.56	0	0	0	0	0	0	0.27	2.5	0	0.1	0	0	0	0	0	0	0	0	0	0	1.64	0	0	0
Peak_539	1	33415731	33415752	+			OK	OK	0	0	0	0	0	0	0	0	0	0	0	0	0	0.46	0	0	0.78	0	0	0	0	0.72	0	0.18	2.1	0	0	0	0	0	0	0	0	0	0	0	0	0	0	0	0
Peak_540	1	33592931	33593113	+			OK	OK	0	0	0.28	0	0	0	0	0	0	0.32	0	0	0	0.46	1.3	0	1.43	0	1.5	0	0	5.04	0.81	1.62	7.1	0.45	0	0	0	0	0	0	0	0	0	1.87	2.1	0	1.14	0	0
Peak_541	1	33776976	33776987	+			OK	OK	0	0	0	0	0	0	0	0	0	0	0	0	0	0	0	0	0.52	0	0	0	0	0.36	0	0	1.9	0	0	0	0	0	0	0	0	0	0	0	0	0	0	0.2	0
Peak_542	1	33879234	33879256	+	ENSBTAG00000009219	Medium	OK	OK	0	0	0	0	0	0	0	0	0	0	0	0	0	0	0	0	0	0	0	0	0	0	0	0.27	0	0	0	0	0	0	0	0	0.54	2.96	5.8	0	0	0	0	0	0
Peak_543	1	34095275	34095289	+			OK	OK	0	0	0	0	0	0	0	0	0	0	0	0	0	3.68	2.86	4.86	3.9	0	0	0	0	1.44	2.43	4.32	0.9	0	0	0	0	0	0	0	0	0	0	0	0	0	0	0.6	0.54
Peak_544	1	34180622	34180712	+			OK	OK	0	0	0	0.12	0.28	0	0.48	0.14	0	0.16	0	0	0	0	0	0	0	0	0	0	0.44	0	0	0	0	0	0	0	0.1	0	0	0	0.27	0	0.29	0	0.42	2.05	0	0	0
Peak_545	1	35123137	35123480	-	ENSBTAG00000026156	High	OK	OK	0.23	0.44	3.92	20.2	4.2	19.57	17.12	26.32	16	25.6	6.12	4.76	3.43	0.69	0.78	0	0.13	13.86	1	0.98	18.7	1.08	0.81	1.62	0.1	0.45	2	0.52	0.1	0.84	0	0.74	4.59	5.18	2.9	2.55	1.68	0.41	2.66	0	0.54
Peak_546	1	35123413	35123455	+			OK	OK	0	0	0	2	0.28	1.52	2.72	1.4	0.32	0.8	0	0	1.47	0	0	0	0	0	0	0	1.54	0	0	0	0	0	0.1	0	0	0	0	0	0.54	1.48	0.29	0	0	0	0	0	0
Peak_547	1	35360637	35360654	+	ENSBTAG00000007939	High	OK	OK	0	0	0	0	0	0	0	0	0	0	0	0	0	0	0	0	0	0	0	0	0	0	0	0	0	0	0	0	0	0	0	0	0	0	0	0	0	0	0	0	0
Peak_548	1	35381208	35381351	+	ENSBTAG00000007939	High	OK	OK	40.94	24.31	19.46	8.12	8.68	15.01	22.88	22.82	5.44	17.92	9.69	27.88	8.82	31.74	24.96	30.24	20.15	21.21	29.5	5.88	27.28	40.68	54.54	29.34	50.2	42.75	21.8	51.74	14.7	16.08	6.25	21.09	27	17.76	14.79	18.7	37.8	25.83	16.34	23.4	30.51
Peak_549	1	35381570	35381622	-			OK	OK	0	0.11	0	0	0	0.38	0	0	0	0	0	0	0	0	0	0	0	0	0.25	0	0.88	0	0	0	0	1.35	0.1	1.04	0	0	0	0	0	0	0	0	0	0	0	0	0
Peak_550	1	35825151	35825172	-			OK	OK	0	0	0	0	0	0	0	0	0	0	0	0	0	0	0	0	0	0	0	0	0	0	0	0	0	0	0	0	0	0	0	0	0	0	0	0	0	0	0	0	0
Peak_551	1	35867166	35867228	+	ENSBTAG00000039151	High	OK	OK	0	0	0	0.12	0	0	0	0	0	0.16	0.51	0	0	0.92	0.78	0.54	0	0	0	0	0	6.48	3.51	6.93	6.1	0	0	0	0	0	0	0	0	0	0	0	0	0	0	0.4	0.27
Peak_552	1	35868318	35868336	-			OK	OK	0	0	0	0	0	0	0	0	0	0	0	0	0	0	0	0	0.13	0	0	0	0	0.72	0.81	1.35	0.4	0	0	0	0	0	0	0	0	0	0	0	0	0	0	0.2	0
Peak_553	1	36018276	36018298	-			OK	OK	0	0	0	0	0	0	0	0	0	0	0	0	0	0	0	0	0	0	0	0	0	0	0	0	0	0	0	0	0	0	0	0	0	0	0	0	0	0	0	0	0
Peak_554	1	36018319	36018384	+	ENSBTAG00000023675	Low	OK	OK	0	0.11	0.28	0.16	0	0.19	0.16	0	0	0.32	0	0	0.49	0	0	0	0	0	0	0	0	0	0	0	0	0	0.7	0.52	0.2	0.24	0	0	0	0	0	0	0.42	0	0	0.8	0
Peak_555	1	36063202	36063434	+	ENSBTAG00000023675	High	OK	OK	0.23	0	0.42	0.72	0.56	0.38	0.16	0.56	0	0.48	0.68	0.68	0	0.46	0	0.54	0.65	0	0	0	0	1.08	0.54	0.63	0.4	0	0	0	0	0	0.25	0	0.54	0.37	0.29	0.34	0	0	0.19	0	0
Peak_556	1	36063338	36063381	-	ENSBTAG00000046959	High	OK	OK	0.69	0.55	1.12	0.44	0.56	0.95	0.64	0.28	0	0.16	1.02	0	0.49	0.46	0	0	0	0	0.25	0.56	0.44	0	0	0.81	0.1	0	0	0.78	0	0.36	0.25	0.74	0.27	0	0	0	1.68	0	0	0	0
Peak_557	1	36063651	36063792	-	ENSBTAG00000046959	High	OK	OK	14.49	20.24	23.24	25.36	9.24	43.32	42.24	23.94	8.64	23.36	13.43	39.44	22.05	42.09	18.2	41.04	21.06	10.92	21.25	9.38	16.72	30.24	34.29	60.84	22.7	49.05	18.1	42.9	13.1	17.28	7.25	16.65	36.72	31.08	16.24	3.06	2.94	12.71	4.18	4.8	16.2
Peak_558	1	36063920	36064031	+	ENSBTAG00000023675	High	OK	OK	26.22	12.32	18.06	19.72	7.84	28.88	32.16	43.68	10.88	37.6	32.13	56.44	31.85	25.53	21.06	47.52	17.68	18.27	27.75	12.6	22.22	55.08	45.36	55.17	52.6	34.65	32.8	51.74	13.3	12.72	8	18.5	28.62	10.36	21.75	24.14	28.98	38.95	28.31	18.8	24.57
Peak_559	1	36064295	36064324	-			OK	OK	0	0	0	0	0	0	0	0	0	0	0.17	0	0	0.46	0	0	0	0	0	0	0	0.36	0.27	0.45	0	0	0	0	0	0	0	0	0	0	0	0	0	0	0	0	0
Peak_560	1	36103887	36103910	+	ENSBTAG00000023675	Medium	OK	OK	0	0	0	0	0	0	0	0	0	0	0	0	0	0	0	0	0	0	0	0	0	0	0	0	0	0	0	0	0	0	0	0	0	0	0	0	0	0	0	0	0
Peak_561	1	36110919	36110933	+			OK	OK	0	0	0	0	0	0	0	0	0	0	0	0	0	0	0	0	0	0	0	0	0	0	0	0	0	0	0.3	0	0	0	0	0	0	0	0	0	0	0	0	0	0
Peak_562	1	36121226	36121235	+			OK	OK	0	0	0.28	0.08	0	0	0	0.42	0.32	0	0	0	0	0	0	0	0	0.42	0	0	0.66	0	0	0	0.6	0	0	0.26	0	0	0	0	0	0	0	0.51	0	0.41	0	0	0
Peak_563	1	36131083	36131085	+			OK	OK	0	0	0	0.04	0	0	0	0	0	0.32	0	0	0	0	0.52	0	0	0	0	0	0	0	0	0.09	0	0.9	0.3	0.78	0	0	0	0	0	0.37	0	0	0	0	0	0.4	0.27
Peak_564	1	36134295	36134296	+			OK	OK	0	0.55	0	0	0	0	0	0	0	0	0	0	0	0	0	0	0	0	0	0	0	0	0	0	0	0	0	0	0	0	0	0	0	0	0	0	0	0	0	0	0
Peak_565	1	36136299	36136312	+			OK	OK	0	0	0.14	0	0	0	0	0	0	0	0	0	0	0	0	0	0	0.63	0	0	0.44	0	0	0	0	0	0.1	0	0	0	0	0	0	0	0	0	0	0	0	0	0
Peak_566	1	36156260	36156628	+	ENSBTAG00000007970	High	OK	OK	17.25	7.59	17.92	23.52	5.6	36.67	38.72	37.38	11.52	34.24	16.49	63.24	41.65	28.06	16.9	42.12	15.86	21.84	10.75	9.24	26.18	70.92	41.31	51.66	68.5	27	22.8	31.98	11.4	12	9	8.51	23.22	22.57	19.72	17.85	19.32	25.83	16.34	26.4	17.55
Peak_567	1	36156414	36156537	-	ENSBTAG00000046959	Medium	OK	OK	2.99	1.54	2.8	0.92	0	2.66	2.88	3.08	0.64	5.28	2.72	10.88	5.39	2.53	1.04	2.16	0.91	0.84	4.25	1.12	1.98	1.44	6.48	4.77	3.1	2.25	4.1	3.12	1	2.4	0.25	0.74	2.7	5.18	6.38	1.53	1.68	2.87	2.28	1.2	2.16
Peak_568	1	36156941	36156959	+	ENSBTAG00000007970	High	OK	Likely_false	0	0	0	0.04	0	0	0	0	0	0	0	0	0	0	0	0	0.13	0	0	0	0	0	0	0	0	0	0	0	0	0	0	0	0	0	0	0	0	0	0	0	0.27
Peak_569	1	36162923	36162939	+			OK	OK	0	0	0	0	0	0	0.16	0	0	0	0	0	0	0	0	0	0	0	0.5	0	0.22	0	0	0.18	0	0	0.5	0	0	0	0	0	0	0	0	0	0	0	0.38	0	0
Peak_570	1	36164773	36164784	+			OK	OK	0	0	0	0	2.24	0	0	0	0	0	0	0	0	0	0	0	0.26	0	0	0	0	0	0	0	0	0.9	0.2	0	0	0	0.25	0	0	0	0	0	0	0	0	0	0
Peak_571	1	36189395	36189406	+			OK	OK	0	0	0	0	0.56	0	0.16	0	0	0.32	0	0	0	0	0	0	0.13	0	0	0	0.22	0	0	0	0.1	0	0	0	0	0	0	0	0	0	0.29	0	0	0	0	0	0
Peak_572	1	36350975	36350991	+	ENSBTAG00000045590	Low	OK	OK	0	0	0	0	0	0	0	0	0	0	0	0	0	0	0	0	0	0	0	0	0	0	0	0	0	0	0	0	0	0	0	0	0	0	0	0	0	0	0	0	0
Peak_573	1	36352493	36352548	+	ENSBTAG00000045590	High	OK	OK	0	0	0	0	0	0	0	0	0	0	0	0	0	0	0	0.54	0	0	0	0	0	0	0	0	0	0	0	0	0	0	0	0	0	0	0	0	0	0	0	0	0
Peak_574	1	36740729	36740754	+			OK	OK	0	0	0	0	0	0	0	0	0	0	0	0	0	0	0	0	0	0	0	0	0	0	0	0	0	0	0	0	0	0	0	0	0	0	0	0	0	0	0	0	0
Peak_575	1	36982002	36982003	-			OK	OK	0	0	0	0.04	0	0	0	0	0	0	0	0	0	0	0	0	0	0	0	0	0	0	0	0	0	0	0	0	0	0	0	0	0	0	0	0	0	0	0	0	0
Peak_576	1	37110626	37110711	+	ENSBTAG00000006811	High	OK	OK	0.23	0.55	0.28	1.48	0.84	1.14	0.32	0.84	0.64	1.92	2.04	4.08	7.84	2.07	2.08	1.08	1.04	0.84	2	1.4	1.1	1.8	1.35	3.24	1.2	0.9	2.6	3.38	0.5	1.08	0.5	0	1.08	1.11	3.48	0	0	2.05	0	0.2	0
Peak_577	1	37656344	37656352	-			OK	OK	0	0	0	0	0	0	0	0	0	0	0	0	0	0	0	0	0	0	0	0	0	0	0	0	0	0	0	0	0	0	0	0	0	0	0	0	0	0	0	0	0
Peak_578	1	37666634	37666639	+			OK	OK	0	0	0	0	0	0	0	0	0	0	0	0	0	0	0	0	0	0	0	0	0	0	0	0	0	0	0	0	0	0	0	0	0	0	0	0	0	0	0	0	0
Peak_579	1	38090675	38090727	-			OK	OK	0	0	0	0	0	0	0	0	0	0	0	0	0	0	0	0	0	0	0	0	0	0	0	0	0	0	0	0	0	0	0	0	0	0	0	0	0	0	0	0	0
Peak_580	1	38211730	38211748	-	ENSBTAG00000023652	High	Low_H3K4me3	Likely_false	0.23	0.22	0.28	0	0.28	0	0	0	0	0	0	0	0.49	0	0	0	0	0	0	0.28	0	0	0	0	0	0.9	0	0	0	0	0	0	0	0	0	0	1.26	0.82	0	0	0
Peak_581	1	38267166	38267309	-	ENSBTAG00000023652	High	OK	OK	10.81	8.47	19.32	16.08	6.72	55.86	28	9.8	10.24	25.92	18.87	62.56	25.97	1.15	1.3	9.72	5.72	8.61	6.25	2.66	12.32	18.72	5.13	4.77	5.1	8.1	5.2	12.22	3.3	3.12	1.25	1.48	19.98	21.83	1.45	5.78	20.58	11.89	11.4	3.4	1.89
Peak_582	1	38267373	38267389	+			OK	OK	0	0	0.14	0.04	0	1.33	0.48	0	0	0	0	2.72	1.96	0.23	0	0	0	0	0	0	0	0	0	0	0	0	0.1	0	0	0	0	0	0	0	0	0	0	0	0.38	0	0
Peak_583	1	38275491	38275774	+	ENSBTAG00000005155	High	OK	OK	14.26	8.03	10.64	12.92	5.6	22.61	16.96	29.68	7.36	33.92	22.27	27.88	16.17	16.33	6.5	23.22	9.36	13.44	14	5.32	9.02	30.24	22.14	33.75	20.9	10.35	11.1	10.14	5.2	5.4	4	2.59	16.74	18.87	14.79	9.86	16.38	11.48	6.46	9.6	16.47
Peak_584	1	38290799	38290807	+	ENSBTAG00000005155	Medium	OK	OK	0	0	0.14	0.04	0	0	0.16	0.28	0	0.64	0	0	0.49	0	0	0	0	0	0	0	0	0.36	0.81	0.27	0.1	0	0	0	0	0	0	0	0	0	0	0	0	0	0	0	0
Peak_585	1	38321529	38321537	-			OK	OK	0	0	0.14	0	0	0	0	0	0	0	0	0	0	0	0	0	0	0	0	0.14	0	0	0	0	0	0	0	0.52	0	0	0	0	0	0	0	0	0	0	0	0	0
Peak_586	1	38330957	38331093	-	ENSBTAG00000005162	High	OK	OK	47.15	24.2	26.32	0	0	0	0.32	0	0	0	0	0	0	0	0	0	0	3.78	7.5	1.96	3.3	0	0	0	0	10.35	8.6	11.44	0.2	4.08	0.5	0.74	6.21	7.4	0	0	0	0	0.19	0	0
Peak_587	1	38360496	38360633	+	ENSBTAG00000015728	High	OK	OK	20.01	10.12	17.78	12.84	10.08	16.15	9.12	8.12	6.4	15.2	16.15	24.48	27.93	11.73	11.7	20.52	10.92	9.24	12.5	5.74	17.6	37.8	36.99	30.06	40.9	14.85	20.9	37.7	2.4	8.04	5.75	5.92	8.91	12.21	15.37	6.8	8.82	18.45	14.63	10.6	10.8
Peak_588	1	38360499	38360515	-	ENSBTAG00000005162	Low	OK	OK	0	0	0	0.2	0	0	0.32	0	0	0	0.17	0.68	0.49	0	0	0	0.26	0	0	0	0	0	0	0	0.5	0	0.1	0	0	0	0	0	0.27	0	0	0	0	0	0.19	0	0
Peak_589	1	38409932	38409943	+			OK	OK	0	0	0	0	0.56	0	0.16	0.14	0	0	0	0	0	0	0	0	0	0	0	0	0.44	0	0	0.09	0	0	0	0	0	0	0	0	0.27	0	0	0	0	0	0	0	0
Peak_590	1	38419278	38419291	+	ENSBTAG00000015728	Medium	OK	OK	0	0.11	0	0.08	0	0	0	0.28	0	0	0	0	0	1.15	1.3	1.62	0.13	0	0	0	0	0	1.35	0.72	0.1	0	0	1.3	0	0	0	0	0	0	0.87	0	0	0	0.19	0.2	0
Peak_591	1	39112757	39112793	-			OK	OK	0	0	0	0	0	0	0	0	0	0	0	0	0	0	0	0	0	0	0	0	0	0	0	0	0	0	0	0	0	0	0	0	0	0	0	0	0	0	0	0	0
Peak_592	1	40974814	40974921	+	ENSBTAG00000050258	High	OK	OK	1.61	3.3	1.68	0	0	0	0	0	0	0	0	0	0	2.99	3.12	4.32	1.82	0	0	0	0	4.68	11.88	6.84	6.7	0	0.2	0	0.1	0.6	0.25	1.11	0	0	0	0	0	0	0	1.6	0
Peak_593	1	41241557	41241561	+			OK	OK	0.23	0.22	0	0	0	0	0	0	0	0	0	0.68	0	0.46	0	0	0	0.63	0	0.14	0	1.08	0	0.27	1.3	0	0	0.52	0	0	0	0	0	0	0	0	0	0	0	0.2	0
Peak_594	1	41675873	41675929	-			OK	OK	0	0	0	0	0	0	0	0	0	0	0	0	0	0	0	0	0	0	0	0	0	0	0	0	0	0	0	0	0	0	0	0	0	0	0	0	0	0	0	0	0
Peak_595	1	41977739	41977765	-			OK	OK	0	0	0	0	0	0	0	0	0	0	0	0	0	0	0	0	0	0	0	0	0	0	0	0	0	0	0	0	0	0	0	0	0	0	0	7.65	14.7	8.2	10.07	0	0
Peak_596	1	42010512	42010757	+	ENSBTAG00000010091	High	OK	OK	3.68	5.28	4.48	3.84	0.28	1.71	7.2	0.84	1.6	0.8	7.14	0	0.49	34.5	23.66	39.96	24.05	4.83	2	1.54	7.04	28.44	31.59	31.05	18	13.95	3.8	12.48	2.1	8.16	0.5	4.07	6.75	7.77	4.06	2.55	2.94	10.25	3.61	12	22.68
Peak_597	1	42016872	42016883	+			OK	OK	0	0.11	0	0	0	0.19	0	0	0	0	0	0	0	0.46	0	0.54	0	0	0	0	0	0.72	0.27	0	0.1	0	0	0.26	0	0.12	0	0	0.54	0	0.29	0.51	0.84	0	0.76	0	0.54
Peak_598	1	42022841	42022849	+			OK	OK	0	0	0	0	0	0	0	0	0	0	0	0	0	0	0	0	0	0	0.5	0.42	0	0	0	0	0	0	0	0.52	0	0	0	0	0	0	0	0	0	0	0.38	0	0
Peak_599	1	42070326	42070406	-			OK	OK	0.23	0.11	0	0.08	0	0.95	0	0	0	0	0	0	0	0.46	0	0.54	0	1.05	0	0	0	0.72	0	0.18	0	0	0.4	0	0.6	0	0	0	1.08	0	0	0.85	0.84	0	0	0	0
Peak_600	1	42070400	42070531	+	ENSBTAG00000047147	High	OK	OK	36.57	12.43	27.86	90.68	38.92	112.48	78.56	37.1	21.12	50.72	54.57	38.76	35.77	44.85	13.52	22.14	12.09	39.48	33.75	14.42	24.42	38.52	28.62	36.36	20.1	36.9	29.4	40.56	12.2	10.2	6	10.73	15.93	50.69	29	221	175.98	149.24	259.92	30.8	68.04
Peak_601	1	42109688	42109689	+			OK	OK	0	0	0	0.08	0	0	0	0	0	0	0	0	0	0	0	0	0	0	0	0	0	0	0	0	0	0	0	0	0	0	0	0	0	0	0	0	0	0	0	0	0
Peak_602	1	42116819	42116836	+	ENSBTAG00000047147	High	OK	Likely_false	0	0	0	0	0	0	0	0	0	0	0	0	0	0	0	0	0	0	0	0	0	0	0	0	0	0	0	0	0	0	0	0	0	0	0	2.38	1.68	1.23	1.33	0	0.27
Peak_603	1	42125344	42125345	+	ENSBTAG00000047147	Medium	OK	Likely_false	0	0	0.14	0.16	0	0	0	0	0	0.48	0	0	0	0	0	0	0.13	0	0	0.14	0	0	0	0	0	0	0.1	0.52	0	0	0	0	0	0	0	0.68	0	0	0.19	0	0.54
Peak_604	1	42127485	42127536	+	ENSBTAG00000047147	High	OK	Likely_false	0	0	0	0	0	0	0.16	0.14	0	0	0	0	0	0	0	0	0	0	0	0	0	0	0	0	0	0	0	0	0	0	0	0	0	0	0	0.68	0	0.41	0.19	0	0
Peak_605	1	42128337	42128349	+	ENSBTAG00000047147	High	OK	Likely_false	0.69	0	0	0	2.8	0	0	0	0.64	0	0.34	0	0	0	0	0	0	0	0	0	0	0	0	0	0	0	0	0	0	0	0	0	0	0	0	0	0	0.82	3.04	0	0
Peak_606	1	42158353	42158355	+			OK	OK	0.23	0	0	0.04	0	0	0	0	0	0	0	0	0	0	0	0	0	0.21	0	0	0	0.36	0	0	0	0	0.1	0	0	0	0	0	0	0	0	0.85	0	3.28	0	0	0.27
Peak_607	1	42196727	42196747	+			OK	OK	0	0	0.14	0.2	0	0	0	0	0	0	0	0	0	0	0	1.62	0	0	0.25	0.28	0.22	0	0	0	0	0	0	0	0	0	0	0	0	0	0	0.34	2.94	0	1.52	0	0.27
Peak_608	1	42206263	42206277	-	ENSBTAG00000015546	High	OK	OK	0	0	0	0	0	0	0	0	0	0	0	0	0	0	0	0	0	0.21	0	0	0.44	0	0	0	0	0	0.3	0.26	0.1	0.24	0	0	0	0	0	0	0	0	0	0	0
Peak_609	1	42230700	42230818	-	ENSBTAG00000015546	High	OK	OK	4.83	2.64	3.5	7.44	2.52	3.8	5.76	10.22	1.92	4.48	6.97	9.52	8.33	15.64	7.8	16.74	7.8	6.51	1.25	3.36	9.24	18.72	16.2	22.95	18.9	7.65	5.9	11.44	2.7	5.16	3.75	4.81	9.45	12.21	16.24	6.63	6.3	8.61	5.51	4	6.75
Peak_610	1	42230822	42230856	+			OK	OK	0.23	0	0	0	0	0.38	0	0	0	0	0.17	2.04	0	0	0	0	0.26	0	0	0	0	0.36	1.62	0.63	0.5	0	0	0	0	0	0	0	0	0	0	0.34	0	0	0	0	0
Peak_611	1	42267238	42267410	-	ENSBTAG00000001416	High	OK	OK	0	0	0	0	0	0	0	0	0	0	0	0	0	0	0	0	0	0	0.25	0	0	0	0	0	0	0	0	0	0	0	0	0	0.27	0	0	0	0	0	0	0	0
Peak_612	1	42486111	42486125	+	ENSBTAG00000033437	Low	OK	OK	0	0	0	0.16	0	0	0.8	0	0	1.12	0	0	0	0	0	0	0	0	0.25	0	0	0	0	0	0	0	0	0	0	0	0	0	1.89	0	0	0	0	0.82	0.19	0	0
Peak_612	1	42486111	42486125	+	ENSBTAG00000051784	Low	OK	OK	0	0	0	0.16	0	0	0.8	0	0	1.12	0	0	0	0	0	0	0	0	0.25	0	0	0	0	0	0	0	0	0	0	0	0	0	1.89	0	0	0	0	0.82	0.19	0	0
Peak_613	1	42829972	42830133	-	ENSBTAG00000020996	High	OK	OK	29.9	38.5	31.5	20.28	9.8	26.41	130.72	35.14	21.76	44.64	19.89	51	38.22	36.57	21.06	41.58	40.56	14.07	28.5	13.44	30.8	48.24	44.82	49.23	59.5	76.95	28.7	47.32	17.7	19.32	7.5	28.49	29.43	30.34	21.17	18.02	19.32	26.65	15.58	33.6	46.98
Peak_614	1	42839257	42839267	+	ENSBTAG00000020997	High	OK	OK	0	0	0	0	0	0	0	0	0	0	0	0	0	0	0	0	0	0.21	0.5	0.14	0	0	0	0	0	1.35	0.9	1.04	0	0.12	0	0	0.27	0	0	0	0	0	0	0	0
Peak_615	1	42842994	42843082	-	ENSBTAG00000020996	Medium	OK	OK	0	0	0.14	0	0	0	0	0	0	0	0	0.68	0	0	0	0	0	1.05	2.5	0.42	1.32	0	0	0	0	2.7	0.8	0.26	0.3	0.24	0	0	0	0	0	0	0	0	0	0	0
Peak_616	1	42875738	42875760	-			OK	OK	0	0	0	0	0	0	0	0	0	0	0	0	0	0	0	0	0	1.47	0.25	0.56	1.76	0	0	0	0	1.35	2.3	1.3	0	0	0	0.37	0	0	0	0.17	0	0	0	0	0
Peak_617	1	42901215	42901457	-	ENSBTAG00000004124	High	OK	OK	3.91	1.65	1.82	7	6.72	3.8	5.92	3.64	0.32	2.88	13.94	2.04	6.86	9.66	7.8	5.94	3.64	3.57	4.25	0.56	3.08	14.04	8.37	8.73	7.9	2.7	1.2	4.42	4.1	3.12	0.75	0.37	2.97	3.33	2.03	3.74	1.26	4.51	3.61	4.6	1.89
Peak_618	1	42907812	42907904	+	ENSBTAG00000023666	High	OK	OK	0	0	0	0	0	0	0	0	0	0	0	0	0	0	0	0	0	0	0	0	0	0	0	0	0	0	0	0	0	0	0	0	0	0	0	0	0	0	0	0	0
Peak_619	1	43023585	43023589	+			OK	OK	0	0	0	0	0	0	0.16	0	0.64	0	0	0	0	0	0	0	0.13	0	0	0	0	0	0	0	0.1	0	0	0	0	0.24	0	0	0	0	0	0	0	0	0	0	0
Peak_620	1	43023837	43024047	+	ENSBTAG00000004471	High	OK	OK	1.61	1.21	1.54	1.84	0	1.52	9.92	0.84	0.32	0	6.8	8.84	7.35	1.61	1.82	4.86	1.04	3.78	2	2.1	3.96	0.36	1.35	2.88	2.8	9.9	6.1	7.8	1.5	3.6	1	1.11	2.16	1.11	1.74	2.21	1.26	1.64	2.47	1	0.81
Peak_621	1	43024274	43024289	+	ENSBTAG00000004471	Medium	OK	OK	0	0	0	0.2	0.28	0	0.16	0	0	0	0.51	0	0	0	0	0	0	0	0	0.14	0.22	0	0	0.18	0.2	0	0	0.26	0	0.6	0	0	0	0	0.29	0.34	0	0	0	0.2	0
Peak_622	1	43024312	43024393	-			OK	OK	0.46	0.44	0.28	1.04	1.4	0.38	0.16	0.28	0	0.32	0.68	0.68	0.49	8.28	3.38	5.94	2.08	0	0	0.28	0.22	3.24	1.89	2.07	3.4	0.45	0.3	0	0.1	0.12	0	0	0	1.48	0.58	10.88	4.62	4.92	5.13	1.6	1.08
Peak_623	1	43024446	43024457	+	ENSBTAG00000004471	Medium	OK	OK	0	0.22	0	0.28	0	0.38	0.48	0	0	0	0	1.36	0	0	0	0	0	0	0	0	0	0	0.27	0.09	0.2	0	0	0	0	0	0.25	0	0	0	0.87	0	0	0.82	0.19	0	0
Peak_624	1	43024597	43024613	-			OK	OK	0	0	0	0	0	0	0	0	0	0	0	0.68	0	0	0	0	0.13	0	0.25	0	0	0	0	0.27	0.1	0	0.1	0	0	0	0	0	0	0	0	0	0	0	0.19	0	0
Peak_625	1	43025033	43025044	-			OK	OK	0	0	0.14	0.52	0.56	0.76	1.12	0	0	0	0.51	1.36	0.49	0	0	0	0	0	0	0	0	0	0	0	0	0	0	0	0	0	0	0	0	0	0	0	0	0	0	0	0
Peak_626	1	43025158	43025194	-			OK	OK	0	0	0.14	0.04	0	0	0.16	0	0	0	0	0	0	0	0	0	0.26	0	0	0	0	0	0	0	0.1	1.35	0.2	0	0	0	0	0.37	0	0	0	0	0	0	0	0	0
Peak_627	1	43031771	43031786	+			OK	OK	0	0	0	0	0	0	0	0	0	0	0	0	0	0	0	0	0	0	0	0	0	0	0	0	0	0	0.6	0	0	0	0	0	0	0	0	0	0	0	0	0	0
Peak_628	1	43045001	43045016	+			OK	OK	0	0	0	0.04	0	0	0	0	0	0.16	0.34	0	0	0	0	0	0	0.21	0	0	0	0	0	0	0	0	0	0	0.1	0.24	0	0	0	0	0.29	0	0	0	0	0	0
Peak_629	1	43059487	43059572	+	ENSBTAG00000004471	High	Low_H3K4me3	OK	0.92	0.55	0.7	0.24	0	0.95	1.12	0.84	0	0.8	0.17	0	0.49	2.07	0.26	1.08	0.91	1.47	4	0.7	3.3	0	2.43	1.62	0.6	11.25	6.5	7.28	2.4	0.6	1	4.07	0	0	0.58	0.17	0.42	1.23	0.19	1.6	11.61
Peak_630	1	43104559	43104573	+			OK	OK	0	0	0	0	0	0	0	0.14	0	0	0	0	0	0	0	0	0	0	0	0	0	0	0	0	0	0	0.6	0	0.2	0	0	0	0	0	0	0	0	0	0.19	0.4	0
Peak_631	1	43108648	43108651	+	ENSBTAG00000004471	Medium	OK	OK	0	0	0	0	0	0	0.32	0	0	0	0	0	0	0	0	0	0	0.21	0	0	0	0.36	0	0.27	0.2	0	0.1	0	0	0	0	0	0.27	0	0	0	0	2.05	0.76	0	0
Peak_632	1	43115838	43115876	+			OK	OK	0.23	0	0	0	0	0	0	0	0	0	0	0	0	0	0	0	0	0	0	0	0	0	0	0	0	0	0	0	0	0	0	0	0	0	0	0	0	0	0	0	0
Peak_633	1	43116697	43116710	-	ENSBTAG00000014889	High	OK	OK	0	0	0	0	0	0	0	0	0	0	0	0	0	0	0	0	0	0	0	0	0	0	0	0	0	0	0	0	0	0	0	0	0	0	0	0	0	0	0	0	0
Peak_634	1	43166623	43166634	-			OK	OK	0	0	0	0.04	0	0	0	0	0	0.16	0	0	0	0	0	0	0.26	0	0.25	0	0	0	0.54	0	0.2	0	0	0	0	0	0	0	0	0	0	0	0	0	0	0.4	0
Peak_635	1	43195055	43195149	-	ENSBTAG00000014889	High	OK	OK	1.61	2.09	2.94	6.84	10.36	11.21	4.48	8.96	0.96	12.16	5.95	6.8	11.76	9.89	11.18	9.18	3.12	1.68	0.75	0.84	1.54	8.64	8.91	8.91	7.5	1.35	0.2	0.78	0.6	0.96	0.25	0	6.21	7.03	2.9	3.74	2.94	0.82	7.79	1.6	6.21
Peak_636	1	43706810	43706866	-	ENSBTAG00000014889	Medium	OK	OK	0	0	0	0.04	0	0	0	0	0	0	4.08	3.4	2.45	0	0	0	0	0	0	0	0	0	0	0	0	0	0	0	0	0	0	0	0	0	0	0	0	0	0	0	0
Peak_637	1	43811898	43811911	+			OK	OK	0	0	0	0	0	0	0	0	0	0	0	0	0	0	0	0	0	0	0	0	0	0	0	0	0	0	0	0	0	0	0	0	0	0	0	0	0	0	0	0	0
Peak_638	1	43902075	43902255	+	ENSBTAG00000013662	High	OK	OK	0.69	1.98	1.96	17.12	4.2	20.52	16	16.94	2.24	12.64	211.14	430.44	96.53	11.27	2.08	3.78	3.12	10.71	2.75	0.84	10.12	12.96	1.62	12.42	4.6	0.9	1.2	0	0.1	1.56	0	0.37	34.56	31.82	18.85	8.33	23.94	15.58	17.67	0.6	1.35
Peak_639	1	44070007	44070019	+	ENSBTAG00000013662	High	OK	Likely_false	0	0	0	0.04	0.28	0	0	0	0	0	2.04	1.36	0.98	0	0	0	0	0	0	0	0	0	0	0	0	0	0	0	0	0	0	0	0	0	0	0	0	0	0.76	0	0
Peak_640	1	44070628	44070780	+	ENSBTAG00000013662	High	OK	Likely_false	0	0	0	0.48	1.4	0.19	0.16	0.28	0.32	0.32	11.05	4.08	1.96	0	0	0	0.26	0.21	0	0	0	1.08	0	0.09	0	0	0	0	0	0	0	0	0.81	1.48	0.29	0.17	0.42	0.41	0.57	0	0
Peak_641	1	44071452	44071469	+	ENSBTAG00000013662	High	OK	Likely_false	0	0	0.14	0.16	0	0	0	0	0.64	0	2.21	0.68	1.96	0.69	0.78	0	0.26	0.42	0	0	0	0	0	0	0	0	0	0	0	0	0	0	0	0	0	0	0	1.23	0.19	0	0
Peak_642	1	44085901	44086012	+	ENSBTAG00000013663	High	OK	OK	7.82	10.34	13.3	17.52	14	11.78	16.8	23.38	8.32	25.6	20.06	27.88	17.64	49.22	26	50.76	24.18	16.38	7.25	5.18	17.16	41.04	42.12	47.97	37.7	9.45	16.8	19.24	5.4	4.8	7.5	4.07	13.23	16.28	3.19	20.57	22.68	29.52	19.76	13	17.55
Peak_643	1	44130155	44130156	-			OK	OK	0	0	0	0	5.32	0	0	0	0	0	0	0	0	0	0	0	0	0	0	0	0	0	0	0	0	0	0	0	0	0	0	0	0	0	0	0	0	0	0	0	0
Peak_644	1	44131748	44131766	-			OK	OK	0	0	0	0	0	0	0	0	0.64	0	0	0.68	0	0	0	0	0	0	0	0	0	0	0	0	0	0	0	0	0	0	0	0	0	0	0	0	0	0	0	0	0
Peak_645	1	44138823	44138886	+	ENSBTAG00000013663	High	OK	OK	0	0.22	0.14	0	0	0	0	0	0	0	0	0	0	0	0	0	0	0	0	0	0	0.36	0	0	0	1.35	0	0	0	0.36	0	0	0	0	0	0	0	0	0	0	0
Peak_646	1	44139390	44139400	-			OK	OK	0	0.66	0	0	0.56	0	0	0.56	0.64	0.32	0.85	0	0	0	0.26	0	0	0.42	1.25	0	0	0	0	0	0	0	0.1	0	0	0	0.75	0	0	0	0	0	0	0	0	0	0
Peak_647	1	44140356	44140375	+	ENSBTAG00000013663	Medium	OK	OK	1.61	2.09	0.42	0.08	0.28	0	0	0	0	0	0	0	0	0	0	0	0	0	0	0	0	0	0	0	0	0	0	0	0	0.24	0	0	0	0	0	0	0	0	0	0	0
Peak_648	1	44142714	44142934	-	ENSBTAG00000013664	High	OK	OK	131.1	66.11	57.26	94.32	41.44	112.67	86.24	327.18	72.96	294.4	176.29	88.4	119.56	21.39	6.76	5.4	4.94	157.5	83.5	21.7	64.24	25.92	14.04	23.04	6.1	86.4	51.3	59.02	46.8	43.8	9	15.17	132.84	50.69	23.78	92.65	85.68	35.67	45.98	13	15.12
Peak_649	1	44142845	44142918	+			OK	OK	0.23	0.22	0.7	1.48	0.56	4.94	0.8	0.84	0.32	0.16	0	0.68	1.47	0	0	0	0	0.63	0	0.14	0.44	0	0	0	0	0	0.3	0	0.3	0.24	0	0	0.27	0.74	0	0	0	0.41	0	0	0
Peak_650	1	44177992	44178014	+			OK	OK	0	0	0	0.08	0	0	0	0.28	0	0	0	0	0	0	0	0	0	0	0	0	0	0	0	0.36	0.1	0	0	0	0.1	0	0	0	0	0	0	0	0	0	0	0	0
Peak_651	1	44199687	44199702	+			OK	OK	0	0	0	0	0	0	0	0	0	0	0	0	0	0	0	0	0	0	0	0	0	0	0	0	0	0	0	0	0	0	0	0	0	0	0	0	0	0	0	0	0
Peak_652	1	44315354	44315367	-			OK	OK	0	0	0	0	0	0	0	0	0	0	0	0	0	0	0	0	0	0	0	0	0	0	0	0	0	0	0	0	0	0	0	0	0.27	0	0	0	0	0	0	0	0
Peak_653	1	44343924	44343938	-			OK	OK	0	0	0	0	0	0	0	0	0	0	0	0	0	0	0	0	0	0	0	0	0	0	0	0	0	0	0	0	0	0	0	0	0	0	0	0	0	0	0	0	0
Peak_654	1	44344031	44344056	+	ENSBTAG00000013663	High	OK	OK	0	0	0	0	0	0	0	0	0	0	0	0	0	0	0	0	0	0	0	0	0	0	0	0	0	0	0	0	0.3	0.12	0.25	0	0	0	0	0	0	0	0	0	0
Peak_655	1	44402014	44402052	+	ENSBTAG00000013663	High	OK	OK	0	0	0	0.12	0	0	0.16	0	0	0.16	0	0	0	0	0	0	0	0	0	0	0	0	0	0	0	0	0	0	0	0	0	0	2.97	18.5	11.89	1.02	0.42	0	0	0	0
Peak_656	1	44402154	44402271	-	ENSBTAG00000013664	High	OK	OK	0	0	0	0	0	0	0.16	0	0	0.16	0	0	0	0	0	0	0	0	0	0	0	0	0	0	0	0	0	0	0	0	0	0	27.81	78.81	152.54	0.17	0	0	0	0	0
Peak_657	1	44483388	44483472	+	ENSBTAG00000013667	High	OK	OK	0	0	0	0	0	0	0	0	0	0	0	0	0	0	0	0	0	0	0	0	0	0	0	0	0	0	0	0	0	0	0	0	0	0	0	0	0	0	0	0	0
Peak_658	1	44483881	44483911	+	ENSBTAG00000013667	High	OK	OK	23.69	39.82	29.96	0	0	0	0	0	0	0	0	0	0	0	0	0	0	0	0	0	0	0	0	0	0	0	0	0	0	0	0	0	0	0	0	0	0	0	0	0	0
Peak_659	1	44555163	44555423	+	ENSBTAG00000015010	High	OK	OK	42.32	19.47	36.4	40.32	24.92	56.05	46.88	40.04	21.12	68.16	52.7	73.44	75.46	46	28.86	53.46	26.26	47.46	43.75	19.88	49.94	75.6	56.16	68.67	80.3	52.2	43.8	100.1	27.8	25.2	14.5	32.56	47.25	27.38	29.58	23.8	23.1	54.12	32.87	26.6	43.47
Peak_660	1	44581239	44581254	+	ENSBTAG00000015010	Medium	OK	OK	0	0.11	0	0	0	0.57	0.16	0	0.96	0	0.68	0	0	0	0	0	0	0	0.25	0	0	0	0	0	0	0	0.1	0.78	0	0	0	0	0.81	0	0	0	0	0	0	0	0
Peak_661	1	44588462	44588521	+	ENSBTAG00000015010	High	OK	OK	0	0	0	0	0	0	0	0	0	0	0	0	0	0	0	0	0	0	0	0	0	0	0	0	0	0	0	0	0	0	0	0	0	0	0	0	0	0	0	0	0
Peak_662	1	44595047	44595054	+			OK	OK	0	0	0	0	0	0	0	0	0	0	0	0	0	0	0	0	0	0	0	0	0	0	0	0	0	0	0	0	0	0	0	0	0	0	0	0	0	0	0	0	0
Peak_663	1	44611033	44611129	+	ENSBTAG00000015010	High	Low_H3K4me3	OK	0.69	0.33	3.78	0.16	0.28	0	0.48	0	0.96	0.32	0	0	0	0.69	0	0	0	1.05	0.75	1.54	0.88	0	0.54	0	0.2	0	2.2	0.26	2	0.84	2.5	1.11	0	0	0	0.17	0.42	0.41	0.19	0	0
Peak_664	1	44617557	44617640	+	ENSBTAG00000004833	High	OK	OK	11.04	5.72	6.86	8.56	3.92	12.35	16.96	7.84	3.52	8.48	3.06	12.92	13.23	4.83	1.3	7.56	5.2	7.56	12.25	1.96	12.32	12.96	6.75	7.29	13.6	15.3	7.5	12.74	7.7	4.92	1.25	4.07	10.26	6.66	5.8	6.97	8.82	12.71	6.46	5.8	2.7
Peak_665	1	44636670	44636676	+	ENSBTAG00000004833	High	OK	OK	0	0	0	0	0	0	0	0	0	0	0	0	0	0	0	0	0	0	0	0.14	0	0	0	0	0.1	0	0	0	0	0	0	0	0	0	0	0.34	0	0	1.33	0	0
Peak_666	1	44639941	44639944	+			OK	OK	0	0	0.28	0	0	0	0	0	0	0.16	0	0	0	0	0	0	0	0	0	0	0	0.72	0	0.27	0.2	0	0.6	0	0.4	0.36	0	0	0	0	0	0	0	0	0	0	0
Peak_667	1	44650720	44650733	-			OK	OK	0.23	0	0	0.08	0	0	0	0.14	0	0	0.17	0	0	0.23	0.26	0	0	0	0	0	0.22	0	0	0.09	1.5	0	0	0	0	0	0	0	0	0	0	0	0	0.41	0	0	0
Peak_668	1	44666000	44666007	-			OK	OK	0	0	0	0	0	0	0	0	0	0	0	0	0	0	0	0	0	0	0	0	0	0	0	0	0.1	0	0	1.04	0	0	0	0	0	0	0	0	0	0	0.57	0	0
Peak_669	1	44674109	44674124	-	ENSBTAG00000014302	Low	OK	OK	0	0	0	0.12	0	0	0.16	0.28	0	0.32	0	0	0	0.69	0	0	0	0.21	0	0.14	0	0	0	0.45	0.1	0	0.1	1.56	0	0	0.25	0	0	0	0	0.17	0	0.41	0.19	0.4	0
Peak_670	1	44674438	44674450	-			OK	OK	0	0.11	0	0	0	0.19	0	0	0	0	0	0	0	0	0	0	0	0.21	0	0.28	0.22	0.72	0	0	0	0	0	0.52	0	0	0	0	0	0	0	0.17	0	0.41	0.57	0.2	0
Peak_671	1	44687322	44687490	-	ENSBTAG00000014302	High	OK	OK	0	0	0	0	0	0	0	0	0	0	0	0	0	0	0	0	0	0	0	0	0	0	0	0	0	0	0	0	0	0	0	0	0	0	0	0	0	0	0	0	0
Peak_672	1	44687391	44687485	+	ENSBTAG00000034442	High	OK	Likely_false	0	0.44	0.14	0	0	0.76	0.8	0	0	0	0	0	0	0.46	0	0	0.52	0	0	0	0	0.72	0	0.72	0.2	0	0.1	0	0	0.12	0.25	0	0.27	0	0	0	0	0	0.19	0	0.27
Peak_673	1	44687938	44688085	-	ENSBTAG00000014302	High	OK	OK	29.67	9.35	10.08	24.6	10.64	29.64	34.08	28.84	8.96	24.16	35.19	24.48	18.62	38.64	16.9	37.26	15.6	24.36	11	10.22	17.16	37.44	34.83	53.37	44.9	13.5	15.6	27.82	17	9.36	2.75	0.74	34.56	19.61	30.45	29.41	23.1	32.8	22.61	7.2	8.1
Peak_674	1	44688128	44688157	+	ENSBTAG00000034442	High	OK	Likely_false	0.23	0.11	0	0.28	0.84	0.57	0.64	0.42	0.32	0	0.51	0	0.49	0.46	0.52	1.62	0.26	0.21	0.25	0	0.22	1.08	1.62	2.52	1.8	0.45	0.4	0	0.3	0.72	0	0.37	0.27	0.37	0.29	0.34	0	0	0.19	0.4	0
Peak_675	1	44688330	44688404	-	ENSBTAG00000014302	Medium	OK	OK	2.07	3.41	5.32	8.28	2.8	11.21	19.68	3.22	0.32	4.48	3.57	4.76	4.41	18.86	14.3	16.74	8.71	1.47	2.5	1.82	4.18	14.76	14.04	13.14	9.1	6.75	2.8	2.86	2.4	3.6	3.75	4.07	8.64	5.18	6.09	4.93	2.94	7.38	5.13	1	7.29
Peak_676	1	44688472	44688571	+	ENSBTAG00000034442	High	OK	OK	2.76	2.2	2.8	3.92	0.56	3.04	7.04	3.5	1.6	0.8	3.06	5.44	4.9	5.98	5.46	3.24	3.25	4.2	5	1.96	3.08	7.2	10.8	9.45	11.6	5.85	3.3	5.46	2.4	4.56	2.5	3.7	1.62	1.48	0.58	3.23	2.94	2.46	6.46	0.4	0.81
Peak_677	1	44688773	44688794	-	ENSBTAG00000014302	Low	OK	OK	0	0	0	0	0	0	0	0	0	0	0	0	0	0	0	1.08	0	0	0	0	0	0	0	0.27	0.1	0.45	0	0	0	0	0	0	0	0	0.29	0	0	0	0	0	0
Peak_678	1	44708985	44708998	+	ENSBTAG00000034442	High	OK	Likely_false	0.92	1.76	0.28	0.56	0	0.57	0.32	0.84	0	0.96	0.34	0	0	0	0	0	0	0	0	0	0.22	0	0	0	0	0	0.2	0	0.4	0	0	0	0.54	0.37	0	0	0.42	0	0	0	0
Peak_679	1	44714461	44714767	+	ENSBTAG00000034442	High	OK	Likely_false	0	0.66	0.28	0.12	0	0.38	0.16	0	0	0	0	0	0	0.23	0	0	0	0.42	0.25	0.42	0.22	0.72	0	0	0.1	0.9	0.4	1.56	0.7	0.24	0	0.74	0	0	0.29	9.69	21.42	29.11	17.48	0	0
Peak_680	1	44737205	44737278	-			OK	OK	0	0	0	0	0	0	0	0	0	0	0	0	0	0	0	0	0	0	0	0	0	0	0	0	0	0	0	0	0	0	0	0	0	0	0	0	0	0	0	0	0
Peak_681	1	44751241	44751324	+	ENSBTAG00000013321	High	OK	OK	0	0	0	0	0	0	0	0	0	0	0	0	0	0	0	0	0	0	0	0	0	0	0	0	0	0	0	0	0	0	0	0	0.81	0	0	0	0	0	0	0	0
Peak_682	1	44916651	44916661	+	ENSBTAG00000004459	Low	OK	OK	0	0	0	0	0	0	0	0	0	0	0	0.68	0	0	0	0	0	0	0	0	0	0	0	0.27	0.1	0	0	0	0.2	0	0	0	0	0	0	0.17	0.42	0	0.38	0.2	0
Peak_683	1	44948236	44948346	+	ENSBTAG00000004459	High	OK	OK	8.97	4.95	9.38	16.52	1.12	27.55	16.32	6.44	3.2	6.24	3.4	6.8	6.37	0.92	0	1.62	0.65	10.71	4.25	1.96	6.6	1.44	1.89	1.53	0.5	10.8	8.1	5.2	2.6	15.84	1.5	21.83	17.82	6.29	4.64	3.4	5.04	5.74	3.42	1.6	0
Peak_684	1	44979439	44979485	+	ENSBTAG00000004459	High	OK	OK	9.2	1.87	3.78	0.04	0	0	0	0	0	0	0	0	0	0	0	0	0	0	0	0	0	0	0	0	0	0	0	0.26	0	0.36	0	0	0.54	0	0	0	0	0	0	0	0
Peak_685	1	45028138	45028152	+	ENSBTAG00000004459	High	OK	OK	0	0	0	0	0	0	0	0	0	0	0	0	0	0	0	0	0	0	0	0	0	0	0	0	0	0	0	0	0	0	0	0	0	0	0	0	0	0	0	0	0
Peak_686	1	45057842	45057857	+	ENSBTAG00000004459	High	OK	OK	0	0	0	0	0	0	0	0	0	0	0	0	0	0	0	0	0	0	0	0	0	0	0	0	0	0	0	0	0	0	0	0	0	0	0	0	0	0	0	0	0
Peak_687	1	45082025	45082145	+	ENSBTAG00000012140	High	OK	OK	2.07	5.94	1.4	0	0	0	0	0	0	0	0	0	0	0	0	0	0	19.11	20.75	7.14	21.56	0	0	0	0	20.7	15.8	48.88	13.9	9.84	4.25	6.66	0	0	0	0	0	0	0	0	0
Peak_688	1	45089195	45089212	+			OK	OK	0	0	0	0	0	0	0	0	0	0	0	0	0	0	0	0	0	0	0	0.56	0.22	0	0	0	0	0	0.5	0.52	0	0.36	0	0	0	0	0	0	0	0	0	0	0
Peak_689	1	45090250	45090272	+	ENSBTAG00000012140	Medium	OK	OK	0	0	0	0	0	0	0	0	0	0	0	0	0	0	0	0	0	0.63	0.75	0	0	0	0	0	0	2.25	0.3	0	0.2	0	0	0	0	0	0	0	0	0	0	0	0
Peak_690	1	45150731	45150752	+	ENSBTAG00000016363	High	OK	OK	0	0	0	1.12	0	0	0.96	0	0	0	0.34	0.68	0	0	0	0	0	0	0	0	0	0	0	0	0	0	0	0	0	0	0	0	0	0	0	0	0	0	0	0	0
Peak_691	1	45155813	45155833	-			OK	OK	0.23	0	0	0.04	0	0.19	0	0	0	0	0.17	0	0	0.46	0	0	0.13	0.21	0	0	0	1.44	0	0.72	0.6	0	0.3	0	0	0	0	0.37	0	0	0	0.34	0	0	0	0.4	0
Peak_692	1	45155917	45156221	+	ENSBTAG00000016363	High	OK	OK	66.01	76.23	98	114.76	31.08	92.91	132	137.34	47.04	103.84	107.61	170.68	131.81	136.16	91.26	170.1	79.82	112.77	87.75	44.52	107.14	219.6	150.93	200.16	158.8	106.2	116.8	146.9	95.6	98.76	42.75	78.81	62.37	105.08	110.49	52.53	70.14	137.35	51.3	58.6	103.41
Peak_693	1	45177649	45177661	+	ENSBTAG00000016363	Medium	OK	OK	0	0	0.28	0.04	0	0	0	0	0	0	0	0	0	0	0	0	0	0	0	0.14	0	0	0	0.27	0.1	0	0.2	0	0	0	0.25	0	0	0	0.29	0	0	0	0	0	0
Peak_694	1	45181472	45181541	+			OK	OK	0	0	0.42	0.08	0	0	0	0	1.28	0	0	0	0	0.23	0	0	0	0.21	2.25	0.42	0	0	0	0.72	0	0	0	0	0.3	0.24	0	0.74	0	0	0	0	0	0	0.19	0	0
Peak_695	1	45185542	45185550	+			OK	OK	0	0.22	0	0.16	0	0	0	0	0	0	0.34	0	0	0	0	0	0	0	0	0.14	0	0	0	0	0.3	0	0	0.26	0.1	0	0	0	0	0	0	0.17	0	0	0	0	0
Peak_696	1	45189717	45189729	-			OK	OK	0	0	0.14	0.16	0	0	0	0.14	0.64	0.16	0	0	0	0	0	0	0	0	0	0	0.22	0	0	0	0	0	0.3	0	0	0	0	0	0	0	0	0	0	0	0	0	0
Peak_697	1	45266955	45266970	-			OK	OK	0	0	0	0.2	0	0	0	0	2.24	0	0	0	0	0	0	0	0.13	0.21	0	0.42	0	0	0	0	0	0	0.1	0.26	0	0.12	0	0	0	0	0	0	0	0	0	0	0
Peak_698	1	45279199	45279213	-			OK	OK	0	0	0.14	0.04	0	0	0	0	0	0	0	0	0	0	0	0	0	0	0	0	0	0	0	0	0	0	0.2	0	0	0	0	1.11	0	0	0	0	0	0	0	0	0
Peak_699	1	45290669	45290684	-			OK	OK	0	0	0	0	0	0	0	0.84	0	0	0	0	0	0	0	0	0	0	0	0.42	0	0	0	0	0	0	0	0	0	0	0	0	0	0	0	0	0	0	0	0	0
Peak_700	1	45291735	45291854	-			OK	OK	0.23	0	0.98	0.4	0	0	0.32	0.56	5.44	0.48	0	0	0	0	0	0	0	0.21	0	0.98	0.66	0	0	0	0	0	1.4	0.26	0	0.12	0.75	0	0	0	0	0.51	0	0	0	0	0
Peak_701	1	45309611	45309612	-	ENSBTAG00000026836	Low	OK	OK	0	0	0	0.12	0	0	0	0	2.56	0	0	0	0	0	0	0	0	0	0	0	0.44	0	0	0	0	0	0.3	0.52	0	0.12	0	0	0	0	0	0	0	0	0	0	0
Peak_702	1	45436352	45436368	+	ENSBTAG00000053387	Medium	OK	OK	0	0	0	0	0	0	0	0	0	0	0	0	0	0	0	0.54	0	0	0	0.14	0	0	0	0	0	0	0.3	0	0	0	0	0	0	0	1.45	0	0	1.23	0	0	0
Peak_703	1	45457126	45457187	-	ENSBTAG00000026836	High	OK	OK	0	0	0	0	0	0	0.32	0	0	0	0	0	0	5.29	0.26	2.7	1.69	0	0	0	0	0	0	0	0	0	0	0	0	0	0	0	0	0	0	0	0	0	0	0	0
Peak_704	1	45477108	45477228	-	ENSBTAG00000026836	High	OK	OK	18.17	46.64	86.24	534.64	48.72	716.11	328.32	256.62	225.6	261.44	15.3	90.44	9.8	69.23	69.16	67.5	41.86	54.18	160.75	75.46	111.98	68.4	56.7	102.24	62.4	216	118.7	243.88	15.6	46.56	19.25	10.73	203.31	223.85	53.94	24.31	34.86	14.76	28.5	3.8	36.45
Peak_705	1	45717608	45717616	-	ENSBTAG00000026836	Medium	OK	OK	0	0	0	0	0	0	0	0	0	0	0	0	0	0	0	0	0	0	0	0	0	0	0	0	0	0	0	0	0	0	0	0	0	0	0	0	0	0	0	0	0
Peak_706	1	45808660	45808663	-			OK	OK	0	0.22	0	0.04	0	0	0.16	0	0	0.48	0.17	0	0.49	0.92	0.52	0	0	0	0.5	0.28	0.22	0.36	0	0.27	0.6	0	0	0	0	0	0	0	0	1.11	0	0	0	0	0.19	0.2	0
Peak_707	1	45808923	45808936	-			OK	OK	0.23	0.11	0	0	0	0	0	0	0	0.16	0	0	0	0	0	0	0	0	0	0	0	0	0	0.18	0	0	0	0	0	0	0	0	0	0	0	0	0	0	0	0	0
Peak_708	1	45822178	45822185	-			OK	OK	0.23	0	0	0	0	0	0	0	0	0	0	0	0	0	0	0.54	0	0.21	0	0	0.22	0	0	0.18	0.4	0	0	0.26	0	0	0	0	0.27	0	0	0	0	0	0.19	0	0
Peak_709	1	45835955	45835969	-			OK	OK	0	0	0.14	0	0	0	0	0	0	0	0	0	0	0	0	0	0	0	0	0	0	0	0	0	0.3	0	0	0	0	0	0	0	0	0	0	0	3.36	0	0	0	0
Peak_710	1	45962090	45962103	+			OK	OK	0	0	0	0.16	0	0	0.16	0	0	0	0	0	0	0	0	0.54	0	0	0	0	0	0	0	0	0.2	0.45	0.1	0.26	0	0.12	0	0	0	0	0	0	0	0	0	0.2	0.27
Peak_711	1	45962305	45962479	+	ENSBTAG00000018731	High	OK	OK	2.76	1.43	1.26	1.36	1.96	1.33	1.12	0.42	0.64	0.32	0.51	0	0.49	2.53	0.78	0	1.17	1.68	4	0.7	0.88	3.6	1.08	2.88	1.6	6.75	2.6	4.16	1	2.04	0.25	0.74	1.35	0.74	0.58	0.34	0	0.82	0.57	0.6	0
Peak_712	1	45962843	45962972	-	ENSBTAG00000016932	High	OK	OK	30.36	8.25	10.64	14.92	8.68	23.37	18.88	35	10.88	30.08	12.41	43.52	27.44	31.97	19.5	27.54	12.87	33.81	26.75	14.7	31.46	82.08	56.43	78.39	86.2	26.55	38	46.54	16.2	10.56	6.75	10.73	26.73	16.28	19.43	16.49	20.58	15.58	19.57	13.8	15.39
Peak_713	1	45962981	45963040	+	ENSBTAG00000018731	High	OK	OK	0	0	0	0.12	0	0	0.16	0.14	0	0.16	0.34	0	1.47	0.23	0.78	0.54	0.52	0	0.25	0	0	1.8	2.7	1.89	1.3	0	0	0	0.3	0	0	0	0.27	0	0	0	0	0	0.19	0.2	0
Peak_714	1	45988166	45988243	-	ENSBTAG00000016932	High	OK	OK	12.42	5.39	3.36	6.56	4.48	10.26	11.84	7.56	2.24	8.16	8.16	14.96	9.31	6.44	8.06	4.32	4.81	7.14	10.75	3.08	9.24	16.56	12.96	13.77	10.3	12.15	11.5	15.08	3.5	3.84	3.25	4.07	6.48	3.7	5.51	3.06	9.24	8.61	4.94	4.2	8.37
Peak_715	1	45988235	45988353	+	ENSBTAG00000024027	High	OK	OK	47.15	21.78	35.84	34.68	13.44	53.2	51.84	40.6	10.88	34.88	17.51	52.36	37.73	38.41	35.88	39.42	21.97	41.79	50	11.2	47.08	81.72	59.94	62.46	73.1	84.15	52.9	94.38	32.6	35.52	11.25	39.22	34.83	33.3	32.77	90.44	96.18	138.99	66.12	22.2	33.48
Peak_716	1	46001750	46001751	-	ENSBTAG00000016932	High	OK	OK	0	0	0	0	0	0	0	0	0	0	0	0	0	0	0	0	0	0	0	0	0	0	0	0	0	0	0	0	0	0	0	0	0	0	0	0	0	0	0	0	0
Peak_717	1	46001880	46002035	+	ENSBTAG00000015069	High	OK	OK	74.75	47.63	90.02	118.92	58.8	118.94	183.36	174.02	64.32	186.88	134.64	202.64	155.82	196.65	188.76	307.8	144.17	105.84	111.75	50.82	116.38	263.16	275.94	257.85	234.8	178.65	137.9	152.62	53.3	72	35	81.4	109.35	147.63	119.19	167.62	191.94	204.18	132.43	134.4	220.86
Peak_718	1	46002418	46002495	-	ENSBTAG00000016932	Medium	OK	OK	1.38	1.43	1.96	1.72	2.8	0.57	0.16	2.52	1.6	2.72	1.7	0	1.96	1.15	0.78	4.32	1.04	1.05	1.5	0.7	1.76	11.16	0.27	5.85	3.2	0	0.7	0.78	0.3	0.72	0.25	0	4.86	1.85	3.77	2.04	2.1	0	1.52	0	1.89
Peak_719	1	46004032	46004040	+			OK	OK	0	0	0.42	0.16	0	0	0	0	0	0	0	0	0	0	0	1.62	0	0.21	0	0	0	0	0	0	0.5	0	0	0	0	0	0	0	0	0	0	0	0	0	0	0	0
Peak_720	1	46004459	46004577	+			OK	OK	0	0.33	0	0.2	0	0	0	0.42	4.8	0	0	0	0	0	1.3	0.54	0.13	0.84	0	0	0.66	0.72	0	0.54	0.2	0.9	0.3	0	0.3	0	1.25	0.74	0	1.11	0	0.51	0.84	0.41	0.38	0	0
Peak_721	1	46028164	46028185	-			OK	OK	0	0	0.28	0.04	0	0	0	0	0	0	0	0	0	0.23	0	0	0	0.21	0	0.14	0.44	0.36	0	0	0.2	0	0.1	0	0	0.36	0	0	0	0	0	0.51	0	0	0	0	0
Peak_722	1	46039766	46039778	-	ENSBTAG00000013460	Medium	OK	OK	0	0	0	0.16	0	0.19	0	0	0	0.32	0	0	0	0.23	0	0	0	0	0.25	0	0	0	0	0.09	0.1	0	0.1	0.26	0	0	0	0	0	1.11	0	0	0.42	0	0	0	0
Peak_723	1	46057589	46057618	-	ENSBTAG00000013460	Low	OK	OK	0	0	0	0	0	0	0	0	0	0	0	0	0	0.23	0	0	0.26	0	0	0.42	0	0	0	0.27	0.4	0	0	0	0	0	0	0	0	0	0	0.17	0	0	0	0	0
Peak_724	1	46057709	46057772	+			OK	OK	0.23	0.44	0.14	0.44	0.56	0.19	0.16	0.14	0	0.48	0.85	4.08	1.47	1.15	0	0	0.13	0.42	0	0.28	0.44	0.72	2.43	1.89	0.7	0.45	0.4	0.52	0.1	0	0.25	0	0	0	0.87	0.17	0	0	0	0.6	0
Peak_725	1	46058419	46058532	-	ENSBTAG00000013460	High	OK	OK	6.21	3.41	1.26	2.64	0.28	5.7	2.4	5.46	0.64	6.72	2.72	8.16	2.94	5.29	2.6	4.86	1.82	6.3	4	2.52	5.5	11.52	7.56	12.87	12.6	2.7	6.1	7.02	4.4	1.92	1.75	0	6.75	3.7	2.9	2.55	2.52	1.64	2.47	1.6	0.27
Peak_726	1	46066866	46067045	-	ENSBTAG00000013461	High	OK	OK	161.23	71.06	134.96	272.4	71.68	270.18	167.84	371.14	77.76	792.16	267.07	428.4	302.33	137.77	57.46	131.76	32.24	206.43	214.75	124.88	173.8	180.72	173.61	249.57	212.5	171.45	209.1	338.52	143	160.32	56.25	70.3	304.56	205.35	252.01	141.78	181.86	169.74	137.56	68	88.83
Peak_727	1	46067023	46067078	+	ENSBTAG00000013464	High	OK	OK	0	0.33	0.42	0.16	0	0	0	0	0	0.48	0.17	0	0.49	0.69	0.26	0.54	0.39	0.63	0.75	0	0.22	2.88	1.62	1.53	2.2	0	0.5	0	0.3	0.12	0	0	0	0	0.87	0.17	0	0	0.57	0	0
Peak_728	1	46077284	46077386	+	ENSBTAG00000013464	High	OK	OK	2.99	2.86	2.66	4.32	0.84	4.75	3.84	13.3	2.56	7.2	2.89	6.12	2.45	16.1	15.86	15.12	12.22	7.35	5.5	3.36	9.24	39.6	21.6	30.42	40.2	4.5	5.1	6.5	4.9	2.76	1	2.96	11.61	6.29	13.63	11.05	18.48	9.43	10.26	3.6	22.68
Peak_729	1	46077604	46077736	+	ENSBTAG00000013464	High	OK	OK	2.53	1.98	0.28	1.8	1.96	1.33	2.56	3.5	0	0.8	0.34	0.68	0.98	3.45	3.38	4.32	1.82	1.68	5	1.12	0.44	4.32	8.91	5.76	3.8	4.05	2.2	2.86	3.5	0.72	1.25	1.48	4.86	3.33	7.25	5.1	2.94	7.38	3.99	2.2	7.29
Peak_730	1	46091714	46091831	+	ENSBTAG00000013464	High	Low_H3K4me3	OK	0	0.33	0	0.16	0	0	0.32	0.84	0	0	0	0	0	0	0	0	1.17	0	0	0	0.66	0	0	0	0.1	0	0.8	0	0.2	0.48	0.75	0	0	0	0.58	0.51	0	0.41	0.38	0.8	2.16
Peak_731	1	46110388	46110526	+	ENSBTAG00000013465	High	OK	Likely_false	0	0	0.98	1.28	0	0.19	0.8	25.76	2.56	17.76	2.21	1.36	0.98	0.23	0	0	0	0.42	0	1.26	0	0.36	0	0	0.1	0	0.9	0	0.1	0.48	0	0	2.16	0	0	2.38	0.42	1.23	0.57	1	0
Peak_732	1	46110583	46110665	-			OK	OK	0.92	0.77	1.12	0.64	2.8	0	0.48	0	4.8	0.16	1.53	0	1.96	0.92	1.04	4.32	1.82	0.21	0	0.14	1.76	1.08	0	2.61	0.2	1.8	1.1	0	0.2	0.6	0.25	0	0.81	0	0	2.21	6.72	3.28	2.09	1.8	5.94
Peak_733	1	46110689	46110759	+	ENSBTAG00000013465	High	OK	OK	8.74	2.64	9.1	7.84	2.24	14.63	8.32	67.9	10.88	53.6	17.68	24.48	13.23	21.85	15.6	32.4	11.05	7.35	9	6.3	8.36	37.8	24.03	23.22	26.4	4.95	9.8	8.84	2.4	3.96	1.25	2.22	12.15	5.18	4.64	20.74	7.14	25.01	8.55	21	19.98
Peak_734	1	46110944	46110956	+	ENSBTAG00000013465	Low	OK	Likely_false	0	0	0	0	0	0	0	0.42	0	0.64	0	0	0	0	0.78	0.54	0.26	0	0	0	0.22	0.72	0	0	0.3	0	0	0	0	0	0	0	1.35	0.37	0	0	0	0	0	0.4	0
Peak_735	1	46126419	46126444	+			OK	OK	0	0	0	0.12	0	0	0.32	0.56	0	0	0	0	0	0	0.52	1.08	0	0	0	0	0	0.36	0	0.18	0.5	0	0.2	0	0	0	0	0	0	0	0	0.85	0	0	0.38	0	0
Peak_736	1	46128053	46128064	-			OK	OK	0	0	0	0	0	0	0	0	0	0	0	0	0	0	0	0	0	0	0	0	0	0	0	0	0	0	0	0	0	0	0	0	0	0	0	0	0	0	0	0	0
Peak_737	1	46161781	46161807	-			OK	OK	0	0	0.28	0.08	0	0	0	0	0	0	0	0	0	0	0	0	0	0	0	0	0	0	0	0	0	0	0	0	0	0	0	0.37	0	0	0	0	0	0	0	0	0
Peak_738	1	46169759	46169851	+	ENSBTAG00000010987	High	OK	OK	0.46	0.33	0.42	0.4	0	0	0.8	0.28	0	0.16	0	0	2.45	0	0	0	0	0.84	0	0.28	2.42	0	0	0.09	0.2	1.8	1.3	4.16	0	0.36	0.25	0	0	0	2.32	0.34	2.94	0	0.19	0	1.08
Peak_739	1	46189825	46189901	-			OK	OK	0.23	0.88	0.28	0.64	0.28	2.09	0.8	0.14	0	0.16	0.85	1.36	5.39	0	0	0	0.13	1.26	2.25	0.42	0.44	0.36	0.27	0.27	0.6	0.9	1.1	1.56	1.6	0.12	0	0.37	0	0	0.58	0.17	0.84	0.41	0	0.4	0
Peak_740	1	46190063	46190130	+	ENSBTAG00000010987	High	OK	OK	6.44	3.74	2.66	2.72	0.56	8.17	8.64	9.8	3.52	2.72	1.87	1.36	2.94	0.23	0.26	0	0.52	17.43	5.25	0.56	8.14	2.52	0.27	1.53	0.8	6.3	0.7	8.06	3.5	3.36	0	0	19.71	4.44	1.16	2.72	1.26	0.82	0.76	0.4	0.54
Peak_741	1	46191173	46191220	-			OK	OK	0	0	0	0.12	0	0.57	0	0	0	0	0	0	0	0.23	0	0	0.65	0	0	0	0	0.36	0	0.36	0.3	0	0	0	0.1	0	0	0	0	0	0	0	2.1	0	0.19	0	0
Peak_742	1	46193390	46193411	+	ENSBTAG00000010987	High	OK	OK	0.23	0	0.42	0.04	0	0	0	0	1.28	0	0.17	0	0	0	0	0	0.13	0.42	0.5	0	0	0	0	0	0	0	0	2.08	0	0	0.25	0	0	1.48	0	0.34	0	0.41	1.14	0.2	0.54
Peak_743	1	46195930	46195944	+	ENSBTAG00000010987	Medium	OK	OK	0	0	0	0.08	0	0	0	0	0.32	0	0	0	0	0	0	0	0	0	0	0	0	0	0	0	0	0	0	0	0	0	0	0	0	0	0.58	0	0	0	0	0	0
Peak_744	1	46196409	46196423	+	ENSBTAG00000010987	Medium	OK	OK	0	0	0.14	0.08	0	0	0.16	0	0	0	0	1.36	0	0	0	0	0	0	0	0.84	0.22	0	0	0	0	0	0	0	0	0.12	0.25	0	0	0	0	0	0	0	0	0	0
Peak_745	1	46201555	46201557	+			OK	OK	0	0	0	0.08	0	0.19	0	0	0	0	0.17	0	0	0	0	0	0	0	0	0	0	0	0	0.18	0	0	0	0	0	0	0	0	0	0	0	0.34	0	0	0	0	0
Peak_746	1	46242129	46242152	-			OK	OK	0	0	0	0	0	0	0	0	0	0	0	0	0	0	0	0	0	0	0	0	0	0	0	0	0	0	0	0	0	0	0	0	0	0	0	0	0	0	0	0	0
Peak_747	1	46303785	46303801	-			OK	OK	0	0	0	0	0	0	0	0	0	0	0	0	0	0	0	0	0	0	0	0	0	0	0	0	0	0	0	0	0	0	0	0	0	0	0	0	0	0	0	0	0
Peak_748	1	46336532	46336538	+			OK	OK	0	0	0	0	0	0	0	0	0	0	0	0	0	0	0	0	0	0	0	0	0	0	0	0	0	0	0	0	0	0	0	0	0.54	0.74	0	0	0	0	0	0	0
Peak_749	1	46338258	46338275	-			OK	OK	0	0	0	0	0	0	0	0	0	0	0	0	0	0	0	0	0	0	0	0	0	0	0	0	0	0	0	0	0	0	0	0	0	0	0	0	0	0	0	0	0
Peak_750	1	46610360	46610374	-			OK	OK	0	0	0	0.04	0	0	0.16	0	0	0	0	0	0	0	0	0	0	0	0	0	0	0	0	0	0	0	0	0	0	0	0	0	0.81	0	0.29	0	0.42	0	0	0	0
Peak_751	1	49780197	49780206	+			OK	OK	0	0	0	0	0	0	0	0	0	0	0	0	0	0	0	0	0	0	0	0	0	0	0	0	0	0	0	0	0	0	0.5	0	0	0	0	0	0	0	0	0	0
Peak_752	1	49930731	49930917	+	ENSBTAG00000000088	High	OK	OK	8.28	5.28	4.34	7.64	5.32	5.32	5.44	7.42	5.44	11.36	9.86	13.6	6.86	57.5	20.28	37.26	11.83	11.34	14.5	16.38	11.66	35.28	10.53	42.03	14.6	9.9	18.9	14.82	8.5	5.64	9.5	3.7	8.1	5.18	10.15	17.51	41.58	11.48	21.09	14.8	14.31
Peak_753	1	49931349	49931365	+	ENSBTAG00000000088	High	OK	OK	0	0.11	0.84	0.52	0.56	1.33	0.16	0.28	0	0.8	0	0	0.49	2.3	0.52	4.86	2.73	0.84	1	0.7	3.08	1.8	0	0.63	1.3	0.45	0.7	2.08	0.6	0	0	0	0.81	0	0.87	0.85	5.88	1.23	1.52	0	0
Peak_754	1	49931892	49931907	-			OK	OK	0	0	0	0.04	0	0	0	0	0	0	0	0	0	0	0	0	0	0	0.5	0	0.22	0	0	0	0	0	0.1	0	0	0	0	0	0	0	0	0	0	0	0.57	0	0
Peak_755	1	50088671	50088677	-			OK	OK	0	0	0	0	0	0	0	0	0	0	0	0	0	0	0	0	0	0	0	0	0	0	0	0	0	0	0	0	0	0	0	0	0	0	0	0	0	0	0	0	0
Peak_756	1	50150044	50150048	+			OK	OK	0	0	0	0	0	0	0	0	0	0	0	0	0	0	0	0	0.13	0	0	0	0	0	1.89	0.54	0	0	0	0	0	0	0	0	0	0	0	0	0.42	0	0.38	0	0
Peak_757	1	50258930	50258958	-	ENSBTAG00000013057	Medium	OK	OK	0.23	0	0.14	0	0	0	0.16	0	0	0	0	0	0	0	0	0	0	0	0	0	0	0	0	0	0	0.9	0	0	0.2	0	0	0.37	0	0	0	0	0	0	0	0	0
Peak_758	1	50293829	50293844	-			OK	OK	0	0	0	0.12	0	0	0	0	0	0.96	0.17	0	0	0	0	0	0	0	0	0	0	0	0	0	0	0	0	0	0	0	0.5	0	0.54	0	0	0	0	0	0	0	0
Peak_759	1	50306852	50306868	-			OK	OK	0.46	0	0	0	0	0	0	0	0	0.64	0.51	0	0	0	0	0	0	0	1	0	0	0	0	0	0.2	0	0	0	0	0	0	0	0.81	0	0	0	0	0	0	0	0
Peak_760	1	50310734	50310752	-	ENSBTAG00000013057	Medium	OK	OK	0	0	0	0.04	0	0	0	0	0	0	0	0	0	0	0	0	0	0	0	0.14	0	0	0.54	0	0	0	0	0	0	0	0	0	0.27	0	0	0	0	0	0	0	0
Peak_761	1	50332083	50332092	-	ENSBTAG00000013057	Medium	OK	OK	0	0	0	0	1.96	0	0	0	0	0	0	0	0	0	0	0	0	0	0	0.14	0	0	0	0	0	0	0.3	0	0.3	0	0	0	0	0	0	0	0	0	0	0	0
Peak_762	1	50348420	50348541	-	ENSBTAG00000013057	High	Low_H3K4me3	OK	0	1.1	0.28	0.12	0.56	0.19	0.48	0.14	0.96	0	0.17	0	0	0	0	0	0	0.42	0	0.42	0	0	0	0.09	0.1	0	0.4	0	0.3	0.12	0.25	0	0	0	0.29	0.34	0	0	0.19	0	0.27
Peak_763	1	50403131	50403144	-			OK	OK	0	0	0	0.24	0	0	0.32	0	0	0	0	0	0	0	0	0	0	0	0	0	0.22	0	0	0	0	0	0	0	0	0	0	0	0	0	0	0	0	0	0.38	0.4	0
Peak_764	1	50434700	50434712	-			OK	OK	0	0.22	0	0	0	0	0	0	0	0.16	0	0	0	0	0	0	0	0	1.75	0	0	0	0	0	0	0	0	0	0	0.12	0.25	0	0.27	0	0	0	0	0	0	0	0
Peak_765	1	50438519	50438608	-			OK	OK	0.23	0.11	1.96	0.16	0	0	0	0	0	0	0.85	0	0	0	0	0	0	0	0	0.42	0.22	0	0.27	0	0	0	0.8	0	0	0	0.25	0	0	0	0	0	0	0	0	0	0
Peak_766	1	50441737	50441754	-			OK	OK	0	0	0	0.04	0	0.19	0	0	0	0	0	0	0	0	0	0	0	0.42	0	0.28	0	0	0	0	0	0	0	0	0	0	0	0	0	0	0.29	0	0	0	0	0	0
Peak_767	1	50454806	50454969	-			OK	OK	0	0.22	0.42	0.2	0.28	0.19	0	0	0	0	0	0	0.98	0	0	0	0	0.63	0	0.14	1.1	0	0	0	0	0	0.3	1.82	0.2	0	0	0	0	0	0	0	0	0	0.19	0	0
Peak_768	1	50480614	50480714	-	ENSBTAG00000013057	High	OK	OK	0.46	1.21	3.92	15.92	7	6.46	8.32	1.26	1.92	2.24	8.5	4.08	4.9	2.3	1.56	0.54	0.52	0.42	2.5	0.98	2.64	4.32	2.7	2.61	1.4	2.25	3.5	8.06	0.5	1.32	1.25	1.85	1.62	11.47	0.58	2.04	3.78	1.23	1.33	2	1.35
Peak_769	1	50481082	50481391	-	ENSBTAG00000013057	High	OK	OK	54.28	34.21	75.74	91.48	21.56	67.64	67.68	26.6	31.04	28.96	68.17	36.04	49.49	38.18	14.04	34.56	11.18	51.87	66.25	23.1	86.24	32.76	31.05	42.39	35.1	98.55	120.5	164.06	25.4	40.56	37	28.49	19.71	65.86	43.79	29.07	16.8	40.18	25.27	31	35.91
Peak_770	1	50691578	50691606	-	ENSBTAG00000013057	Low	OK	OK	0.23	0	0	0.12	0	0	0	0	0	0	0	0	0	0.23	0	0	0	0	0	0	0	0	0	0	0	0	0	0	0.2	0	0	0	0	0	0	0	0	0	0	0.2	0
Peak_771	1	50788392	50788394	+			OK	OK	0	0	0	0	0	0	0	0	0	0	0.17	0	0	0	0	0	0	0	0	0.14	0	0	0	0	0	0	1.2	0	0	0	0	0	0	0	0	0	0	0	0	0	0
Peak_772	1	50892808	50892887	+			OK	OK	0	0	0	0	0	0	0	0	0	0	0	0	0	0	0	0	0	0	0	0	0	0	0	0	0	0	0	0	0	0	0	0	0	0	0	0	0	0	0	0	0
Peak_773	1	51533438	51533468	-			OK	OK	0	0	0	0	0	0	0	0	0	0	0	0	0	0	0	0	0	0	0	0	0	0	0	0	0	0	0	0	0	0	0	0	0	0	0	0	0	0	0	0	0
Peak_774	1	51751230	51751244	-			OK	OK	0	0	0	0	0	0	0	0	0	0	0	0	0	0	0	0	0	0	0	0	0	0	0	0	0	0	0.3	0	0	0	0	0	0	0	0	0	0	0	0	0	0
Peak_775	1	51788484	51788503	-			OK	OK	0	0	0	0.44	0	0	0	0	0	0	0.17	0	0	0	0	1.62	0.13	0	0	0	0	0	0	0.27	0.6	0	0	0	0	0	0	0	0	0	0	0	0	0	0.19	0.2	0
Peak_776	1	51788533	51788623	+	ENSBTAG00000006893	Low	OK	OK	0.46	0.22	0.14	0.52	0.56	2.66	0.96	2.38	0	1.12	1.19	6.8	2.45	3.91	4.16	3.24	1.82	0	0.25	0.28	0.44	0.36	0	1.35	1.1	0	0.8	0.26	0.2	0.48	0	0	1.62	0	0.58	1.19	1.68	1.23	1.14	3.2	7.83
Peak_777	1	51940528	51940580	+	ENSBTAG00000046313	High	OK	OK	0	0	0	0.12	0	0	0	0	0	0	0	0	0	0	0	0	0	0	0	0	0	0	0	0	0	0	0	0	0	0	0	0	0	0	0	0	0	0	0	0	0
Peak_778	1	52023953	52023971	+			OK	OK	0	0	0	0.04	0	0	0	0	0	0	0.17	0	0	0	0	0	0.13	0	0	0	0	0	0	0	0	0	0.2	0	0	0.12	0	0	0	0	0	0	0	0	0	0	0
Peak_779	1	52024279	52024297	+			OK	OK	0	0	0	0	0	0	0	0	0	0	0	0	0	0.23	1.04	0	0.13	0	0	0	0	0	0	0	0	0	0	0	0	0	0	0.37	0	0	0	0	0	0	0	0	0.54
Peak_780	1	52024563	52024631	-			OK	OK	0	0	0.28	0.44	0.28	0.19	0.8	0.56	0	0.48	0.51	0	0.98	2.07	0.26	1.62	0.65	0.42	0	0.14	0	1.08	1.62	2.61	0.7	0	0.1	0	0.4	0.72	0	0	0.81	0	0.29	0.17	0	0	0.38	0.4	0.54
Peak_781	1	52124060	52124061	+			OK	OK	0	0	0	0	0	0	0	0	0	0	0	0	0	0	0	0	0	0	0	0	0	0	0	0	0	0	0	0	0	0	0	0	0	0	0	0	0	0	0	0	0
Peak_782	1	52133054	52133376	+	ENSBTAG00000006893	High	OK	OK	47.15	70.84	49.98	12.6	6.44	64.03	104.96	159.88	80.64	86.4	30.26	111.52	85.26	30.36	34.32	37.8	32.89	105.84	106.5	18.76	54.78	126.72	91.8	50.31	76.8	155.25	135.4	152.36	39.2	39.36	24	6.29	44.01	64.01	44.08	36.21	40.74	51.66	39.71	17.4	102.87
Peak_783	1	52133586	52133714	+	ENSBTAG00000006893	High	OK	OK	0.69	2.42	1.26	0.76	0	2.09	1.28	2.8	1.92	1.76	0.34	4.08	0.98	1.84	1.3	2.7	1.69	0.42	0.5	0.14	0.44	1.8	3.78	2.79	2.6	1.35	0.8	2.08	0.5	0.96	0	0	0.27	1.11	0	0	2.52	0	0.38	0.8	3.24
Peak_784	1	52133872	52133911	+	ENSBTAG00000006893	Medium	OK	OK	0.23	0	0	0.36	0.28	0	0.64	0	0	0.16	0.34	0.68	0	0.69	0	0	0	1.05	1	0.14	0	0.36	0.27	0.09	0.2	0	0.1	1.04	0.1	0.48	0	0	0	0.37	0	0	0	0	0.19	0.2	0
Peak_785	1	52134302	52134321	+	ENSBTAG00000006893	Medium	OK	OK	0	0	0	0.12	0	0	0.16	0.28	0.64	0.32	0	0.68	0	0.23	0	0.54	0	0	0	0	0	0.36	0	0.09	0.3	0	0	0.52	0.1	0	0	0	0.54	0	0	0	0	0	0	0	0
Peak_786	1	52134519	52134535	+	ENSBTAG00000006893	Medium	OK	OK	0	0	0	0	0	0	0	0	0	0	0	0	0	0.69	0	0	0.26	0	0	0	0	0	0	0.63	0	0	0	0	0	0	0	0	0	0	0	0	0	0	0	0	0
Peak_787	1	52135513	52135552	+	ENSBTAG00000006893	High	OK	OK	0	0	0	0.16	0.84	0	0.64	0	0	0	0	0	0	0.46	0	0	0.13	0.42	0	0	0.22	0	0.81	0.63	0.6	0	0.4	0.26	0	0	0	0	0	0	0	0	0	0	0	0	0.81
Peak_788	1	52136081	52136106	-			OK	OK	0	0	0	0.08	0	0	0.16	0	0	0	0	0	0	0.46	0	0.54	0	0	0	0	0	0	0	0	0.1	0	0	0	0	0	0	0.37	0	0	0.58	0	0	0	0	0	0
Peak_789	1	52136440	52136443	+	ENSBTAG00000006893	Low	OK	OK	0	0.11	0	0.12	0	0.19	0.16	0.28	0	0	0	0	0	0	0	0	0	0.21	0	0	0	0	0	0	0	0.45	0	0	0	0	0.25	0	0	0	0	0.17	0.42	0	0	0	0.54
Peak_790	1	52158649	52158803	+			OK	OK	0	0	0.56	0	0	0	0.16	0.14	0.32	0.32	0	0	0	0	0	0	0	0.42	1	0.28	1.1	0.36	0.54	0.27	0	0	0	0.26	0	0	0	0	0.81	0	0	0.68	0	0.41	0	0.2	0
Peak_791	1	52160028	52160029	+			OK	OK	0	0.11	0	0	0	0	0	0.56	0	0.16	0	0	0	0	0	0	0	0	0	0	0	0	0.54	0	0	0	0	0	0.1	0	0	0	0	0	0	0	0	1.23	0	0.2	0
Peak_792	1	52171389	52171415	+			OK	OK	0	0	0	0.04	0	0	0	0	0	0.32	0	0	0	0	0	0	0	0.42	0	0	0	0	0	0	0.1	0	0	0.52	0.2	0	0	0.37	0	0	0	0	0	0	0.19	0	0
Peak_793	1	52189619	52189753	+	ENSBTAG00000006893	High	OK	OK	0	0.44	0.84	1.48	1.12	1.33	1.92	2.24	2.88	1.44	1.36	4.76	1.47	5.98	7.54	4.32	2.6	0.63	0.25	0.42	0.66	7.56	3.51	3.42	4.5	0	1.7	1.3	0.2	0.72	0.75	0	1.89	2.59	0.87	0.17	0	0.41	0.76	1.6	4.59
Peak_794	1	52198141	52198153	+			OK	OK	0	0	0	0	0	0	0	0	0	0	0	0	0	0	0	0	0	0	0	0.14	0	0	0	0	0	0	0	0	0	0	0	0	0	0	0	0	0	0	0	0	0
Peak_795	1	52206754	52206811	+			OK	OK	0	0	0.28	0	0	0	0	0	0.32	0	0	0	0	0	0	0	0	0	1.5	0	0.44	0	0	0.18	0.1	0	0	0	0	0	0	0	0	0	0	0	0	0	0	0	0.81
Peak_796	1	52213095	52213110	+			OK	OK	0	0	0	0	0	0	0	0	0	0	0	0	0	0	0	0	0	0	0	0	0	0	0	0.18	0	0	0.2	0	0	0	0	0	0	0	0	0	0	0	0	0	0
Peak_797	1	52214252	52214318	+	ENSBTAG00000006893	High	OK	OK	0	0.11	0	0.12	0	0.19	0.48	0.28	0	0.48	0	0	1.47	0	0	0	0.13	0	0	0.14	0.44	0	0	0.09	0	0.9	1.1	0.26	0	0	0	0	0.81	0	0.58	0	0	0	0.19	0	0.54
Peak_798	1	52214496	52214524	+	ENSBTAG00000006893	High	OK	OK	0	0	0	0	0	0	0	0	0	0	0	0	0	0	0	0	0	0.84	0.5	0	1.98	0	0	0.18	0.3	0.45	0.2	3.9	0.1	0	0	0	0.54	0	0	0	0	0	0	0	0
Peak_799	1	52214705	52214729	+	ENSBTAG00000006893	High	OK	OK	0	0	0	0.2	0	0.38	0.16	0	0.64	0.16	0	0.68	0	0	0	0	0.13	0.84	0	0	0	0	0	0	0.1	0	0.1	0.26	0	0	0	0.37	0	0	1.16	0	0	0	0	0	0
Peak_800	1	52265371	52265390	-			OK	OK	0	0	0	0	0	0	0	0	0	0	0	0	0	0	0	0	0	0	0	0	0	0	0	0	0	0	0	0	0	0	0	0	0	0	0	0	0	0	0	0	0
Peak_801	1	52276023	52276040	+	ENSBTAG00000006893	High	OK	OK	3.68	0.55	4.06	0	0	0	0	0	0	0	0	0	0	0	0	0	0	0	0	0	0	0	0.54	0	0	0	0	0	0	0	0	0	0	0	0	0	0	0	0	0	0
Peak_802	1	52277474	52277487	+			OK	OK	0	0	0	0	1.12	0	0	0	0	0	0	0	0	0	0	0	0	0.42	0	0	0	0	0	0.09	0	0	0.1	0.26	0	0	0	0	0	0	0	0	0	0	0	0.2	0
Peak_803	1	52291733	52291756	+			OK	OK	0	0	0.14	0	0	0	0	0	0.96	0	0	0	0	0	0	0	0.13	0	0	0	0.66	0.36	0	0	0	0	0	0	0	0	0	0	0	0	0	0.34	0	0	0	0	0
Peak_804	1	52301278	52301279	+			OK	OK	0	0	0	0	0	0	0	0	0	0.8	0	0	0	0	0	0	0	0	0	0	0	0	0	0	0	0	0	0	0	0	0	0	0	0	0	0	0	0	0	0	0
Peak_805	1	52322048	52322083	+	ENSBTAG00000006893	High	OK	OK	0	0	0	0	0	0	0	0	0	0	0	0	0	0	0	0	0	0	0	0	0	0	0	0	0	0	0	0	0	0	0	1.11	0.27	0	0	0	0	0	0	0	0
Peak_806	1	52396693	52396704	+	ENSBTAG00000006893	High	OK	OK	0	0.11	0	0.16	0	0	0	0.14	0.32	0	0	0	0.49	0	0	0	0.39	0	0	0	0	0	0	0	0.5	0	0	0	0.1	0.12	0	0	0	0	0	0.17	0	0	0	0.4	0.54
Peak_807	1	52423718	52423731	+			OK	OK	0	0	0	0	0	0.57	0	0	0	0.48	0	0	0	0	0	0	0	0	0	0	0.22	0	0	0	0	0	0	0	0	0	0	0	0.27	0	0	0	0	0	0	0	0
Peak_808	1	52425564	52425575	+	ENSBTAG00000006893	Medium	OK	OK	0	0	0	0.08	0	0	0	0.42	0	0.48	0	0	0	0	0	0	0	0.42	0	0.28	0	0	0	0.09	0.1	0	0	0.26	0	0	0.25	0	0	0	0	0	0	0.82	0.19	0	0
Peak_809	1	52426062	52426074	+			OK	OK	0	0.33	0	0	0	0	0	0.56	0	0	0	0	0	0	0	0	0	1.26	0	0	0	0	0	0	0	0	0.2	0	0	0	0	0	0	0	0	0	0	0	0	0	0
Peak_810	1	52426897	52426989	+			OK	OK	0.46	0.11	0.42	0.04	0	0	0	0.7	1.28	0	0	0	0	0.23	0.52	0	0	0	0	0.42	0.22	0.36	0	0	0	0.9	1.1	0	0.5	0	0.75	0	0.27	0.37	0	0.68	0	0	0.19	0	0
Peak_811	1	52427811	52427831	+			OK	OK	0	0	0	0	0	0.38	0	0	0	0.16	0	0	0.49	0	0	0	0.13	0.21	0.5	0	0.22	0	0.27	0.63	0.6	0	0	0	0	0.12	0.5	0	0.27	0	0	0	0	0	0.19	0	0
Peak_812	1	52428322	52428473	+			OK	OK	0	0.66	1.26	0	0	0	0	0.56	0	0	0.34	0	0	0	0	0	0.13	0	0	0.98	0	0	0	0.27	0.2	0.45	0.1	0	0.2	0.48	0.25	0	0	0	0	0	0	0	0	0	0
Peak_813	1	52517569	52517588	-			OK	OK	0	0	0	0	0	0	0	0	0	0	0	0	0	0	0	0	0	0	0	0	0	0	0	0	0	0	0	0	0	0	0	0	0	0	0	0	0	0	0	0	0
Peak_814	1	52552343	52552364	+			OK	OK	0	0	0	0	0	0	0	0	0	0	0	0	0	1.84	0	0	0.91	0	0	0	0	0	0	1.17	1.2	0	0	0	0	0	0	0	0	0	0	0	0	0	0	0.8	0.54
Peak_815	1	52639901	52639906	+			OK	OK	0	0	0	0	0	0	0	0	0	0	0	0	0.49	0	0	0	0	0	0	0.14	0	0	0	0	0	0	0	0	0	0	0	0	0	0	0	0	0	0	0	0	0
Peak_816	1	52642258	52642282	-			OK	OK	0.23	0	0	0	0	0	0	0	0	0	0	0	0	0	0	0	0	0	0	0	0.22	0	0	0	0	0	0	0	0	0	0	0	0	0	0	0	0	0	0	0	0
Peak_817	1	52661849	52661890	-			OK	OK	0	0	0.14	0	0	0.38	0.16	0	0	0	0	0	0	0	0	0	0	0	0	0	0	0	0	0	0	0	0	0	0	0	0	0	0	0	0	0	0	0	0	0	0
Peak_818	1	52662027	52662041	+			OK	OK	0	0	0	0	0	0	0	0	0	0	0	0	0	0	0	0	0	0	0	0	0	0	0	0	0	0	0	0	0	0	0	0	0	0	0	0	0	0	0	0	0
Peak_819	1	52710885	52710899	-			OK	OK	0	0	0.28	0	0	0	0	0	0	0	0	0	0	0	0	0	0	0.21	0	0.14	0	0	0	0	0	0	0.6	0	0.5	0	0	0.37	0	0	0	0	0	0	0	0	0
Peak_820	1	52711944	52712279	-	ENSBTAG00000003585	High	Low_H3K4me3	OK	0	3.41	5.88	2.28	7	0.76	5.92	0.84	10.24	0.64	0.17	0	0	2.99	6.5	2.16	1.43	0	2.75	1.12	4.18	0.72	1.35	1.62	1.7	2.25	2.4	0.26	1.4	3.48	0.5	4.44	1.62	3.7	0.87	1.02	0.84	0.82	3.04	0	1.89
Peak_821	1	52713128	52713194	-	ENSBTAG00000003585	High	Low_H3K4me3	OK	0	1.21	0.84	0.44	7.28	0	0.48	0.42	1.92	0.16	0	0	0	0.23	1.82	0.54	1.3	0.21	0	0.7	0.44	0	0	0	0.3	0	0.1	0	0.1	1.44	0.25	0.74	0	3.7	0	0.17	0	0	0.19	0	0
Peak_822	1	52713352	52713499	-	ENSBTAG00000003585	High	Low_H3K4me3	OK	0	1.65	3.5	0.72	2.52	1.14	1.44	0.14	5.76	0.16	0	1.36	0	2.3	0.26	0	1.3	0.42	3	1.54	1.98	1.44	0	1.62	1.9	2.25	1.4	0.52	1.6	0.48	1	0.74	1.62	0.74	0	1.19	0	0	3.23	0	0
Peak_823	1	52716270	52716282	-	ENSBTAG00000003585	Medium	OK	OK	0.23	0	0.14	0.2	0	0	0	0	0	0	0	0	0	0	0	0	0.26	0.21	0	0	0	0	0.54	0	0	0	0.1	0	0	0	0	0	0	0	0	0	0	0	0	0	0
Peak_824	1	52720177	52720294	-			OK	OK	0.92	0.55	1.68	0	0	0	0.8	0.14	0.32	0	0	1.36	0	0.23	1.3	0	0.13	1.47	0	0.84	0.66	0.36	0	0.45	0.3	0	2.4	0	0.3	0.6	0	0	0	0.37	0.29	0.34	0	1.23	0.38	0	0.81
Peak_825	1	52742068	52742081	-			OK	OK	0	0	0	0.08	0	0	0	0	0	0.16	0	2.04	0	0	0	0	0	0.21	0	0	0	0	1.89	0	0.2	0	0	0.26	0	0	0	0	0	0	0	0	0	0	0.19	0	0
Peak_826	1	52742409	52742540	-			OK	OK	0.46	0	0.28	0.04	0	0.38	0.32	0.14	1.92	0.16	0	0	0	0	0.52	0	0.26	0	1.5	0.28	1.32	0.72	0.27	0.09	0.2	0.45	0.6	0	0	0	0	0	0.27	0	0	0.17	0	0	0.57	0	0.54
Peak_827	1	52744522	52744670	-			OK	OK	0.23	0	0	0.64	0.56	0.57	0	0.42	0	0.32	0	0	0.49	0	0	0	0	0	1.25	0	0.66	0.36	1.89	0.18	0.2	0.9	0	0.78	0	0	0	0.37	0	0	0.29	0.51	0	0	0	0	0.81
Peak_828	1	52777129	52777256	-	ENSBTAG00000003585	High	OK	OK	197.57	73.92	123.9	133.08	45.92	212.23	152.64	155.68	48.64	117.6	49.64	172.04	100.45	109.25	95.42	125.28	57.72	175.56	179.5	70.98	209.44	246.24	159.84	182.7	219.9	184.05	181.3	221.26	80.5	75.84	36.25	73.63	135.81	95.46	71.34	105.74	130.62	76.26	89.49	34.6	62.64
Peak_829	1	52777681	52777754	-	ENSBTAG00000003585	High	OK	OK	0.92	0.77	1.4	1.72	0	1.9	1.6	0.7	0.32	0.96	1.53	2.04	1.47	2.99	7.02	9.18	2.47	0.21	0.75	0.98	4.18	2.16	2.97	2.79	2.1	0	2.9	2.08	1.4	1.2	1.25	1.11	0.54	0	0	2.38	1.26	0.41	0.38	1	0.54
Peak_830	1	52777931	52777939	-	ENSBTAG00000003585	Medium	OK	OK	0	0	0	0	0	0	0	0.14	0	0	0	0	0	0	0	2.16	0	0	0	0	0	0	1.08	0.09	0	1.8	0	0	0	0	0	0	0	0	0	0	0	0	0	0	0
Peak_831	1	52787984	52788024	+			OK	OK	0	0	0	0	0	0	0	0	0	0	0	0	0	0	0	0	0	0	0	0	0	0	0	0	0	0	0.8	0.78	0	0	0	0	0	0	0	0	0	0	0	0	0
Peak_832	1	52844865	52844974	+			OK	OK	0	0	0.14	0	0	0	0	0	0	0	0	0	0	0	0	0	0	0	0	0	0	0	0	0	0	0	0	0	0	0.36	0	0	0	0	0	0	0	0	0.19	0	0
Peak_833	1	52952381	52952392	-			OK	OK	0	0	0	0	0	0	0	0	0	0	0	0	0	0	0	0	0	0	0	0	0	0	0	0	0	0	0	0	0	0	0	0	0	0	0	0.17	0	0	0	0	0
Peak_834	1	52953279	52953518	-	ENSBTAG00000005787	High	OK	OK	29.44	21.45	15.4	28.36	8.68	26.41	44.48	59.36	16	41.6	16.66	28.56	32.34	34.96	31.2	33.48	19.89	48.51	18.25	7.7	27.06	34.92	47.79	26.55	34.1	27.9	28	28.86	15.9	27.72	4.25	4.07	37.8	29.23	16.24	48.45	65.1	40.18	29.07	12.8	17.28
Peak_835	1	52998626	52998717	+	ENSBTAG00000018397	High	OK	OK	0.46	0.33	0.7	0	0	0	0	0	0	0	0	0	0	0	0	0	0	3.57	6.5	0.56	13.86	0	0	0	0	13.05	3.8	14.3	18.1	3	2	7.03	0	0	0	0	0	0	0	0	0
Peak_836	1	53213682	53213717	+			OK	OK	0	0	0	0	0	0	0	0	0	0	0	0	0	0	0	0	0	0	0	0	0	0	0	0	0	0	0	0	0	0	0	0	0	0	0	0	0	0	0	0	0
Peak_837	1	53311966	53311977	-			OK	OK	0	0	0.7	0	0	0	0	0	0.32	0	0	0	0	0	0	0	0	0	0	0	0.22	0	0	0	0	0	0.4	0	0	0.12	0	0	0	0	0	0	0	0	0	0	0
Peak_838	1	53338552	53338821	-	ENSBTAG00000017140	High	OK	OK	4.14	1.98	2.94	4.48	0	10.26	4.32	6.16	0.96	6.56	2.21	11.56	3.92	6.21	4.94	2.7	1.69	6.3	4.25	2.8	5.06	12.6	5.13	13.59	16.5	9	5.7	7.8	5.3	2.52	1	4.07	4.86	2.22	4.35	1.53	3.78	3.28	1.71	1.6	5.94
Peak_839	1	53338624	53338887	+	ENSBTAG00000006158	High	OK	OK	6.21	3.08	2.1	1.24	1.4	3.04	4.16	10.08	0.32	4.64	2.04	14.28	8.82	8.97	8.84	9.72	6.24	3.15	2	1.26	2.64	38.52	23.22	26.28	37.7	2.7	4.6	1.56	1.8	1.8	0	0.74	1.89	3.7	2.9	4.08	7.14	3.69	3.99	8.2	10.26
Peak_840	1	53339259	53339272	-	ENSBTAG00000017140	Low	OK	OK	0	0	0	0	0	0	0	0	0	0	0	0	0	0	0	0	0	0	0	0	0.22	0.36	0	0.36	0	0	0	0	0.1	0	0	0	0	0	0	0	0	0	0	0	0
Peak_841	1	53388349	53388350	+			OK	OK	0	0.33	0	0.12	0	0	0	0	0	0	0	0	0	0	0	0	0.13	0	0	0	0	0	0	0.18	0.3	0	0	0	0	0	0	0	0	0	0.29	0	0	0	0.19	0	0
Peak_842	1	53562059	53562113	+	ENSBTAG00000049108	Medium	Low_H3K4me3	Likely_false	0	0	0.14	0	0	0	0	0	0	0	0	0	0	0	0	0	0	0.21	0	0	0	0	0	0	0	0.45	0.3	0.26	0	0	0	0	0	0	0	0	0	0	0	0	0
Peak_842	1	53562059	53562113	+	ENSBTAG00000049130	High	Low_H3K4me3	Likely_false	0	0	0.14	0	0	0	0	0	0	0	0	0	0	0	0	0	0	0.21	0	0	0	0	0	0	0	0.45	0.3	0.26	0	0	0	0	0	0	0	0	0	0	0	0	0
Peak_843	1	53562568	53562586	+	ENSBTAG00000049130	High	Low_H3K4me3	OK	2.07	0.88	1.26	4.48	0.84	1.14	2.72	0.98	0	3.2	2.89	0.68	3.43	4.14	1.3	3.78	0.65	1.26	1.5	0	1.76	2.88	2.43	3.33	1.3	0.45	0.3	3.12	0.5	0.36	0	1.11	1.62	0	0.58	0.85	0	0.41	1.71	1.2	0
Peak_844	1	53578525	53578540	-			OK	OK	0	0	0	0	0	0	0	0	0	0	0	0	0	0	0	0	0	0	0	0.28	0	0	0	0	0	0	0	0	0	0	0	0	0	0	0	0	0	0	0	0	0
Peak_845	1	53578629	53578866	+	ENSBTAG00000049108	High	OK	OK	2.99	1.65	2.66	0.6	0	0.95	0.96	0.42	0.32	0.64	0.34	3.4	0.49	0	0	0	0.13	17.01	32.5	5.88	22.66	0	0	0.09	0	52.65	31.5	66.56	9.1	3.24	3	5.92	0	0	0.87	1.02	1.26	0	0.19	0.4	0
Peak_846	1	53617867	53617873	+	ENSBTAG00000049108	High	OK	Likely_false	0	0	0	0	0	0	0	0	0	0	0	0	0	0	0	0	0	0	0	0	0	0	0	0	0	0	0	0	0	0	0	0	0	0	0	1.53	2.1	1.23	3.23	0	0
Peak_847	1	53715643	53715738	-			OK	OK	0	0	0	0	0	0	0	0	0	0	0	0	0	4.6	1.04	4.86	6.76	0	0	0	0	0	0	0	0.3	0	0	0	0	0	0	0	0	0	0	0	0	0	0	0	0
Peak_848	1	53901806	53901908	+	ENSBTAG00000050173	High	OK	OK	0	0	0.14	0	0	0	0	0	0	0	0	0	0	0	0	0	0	0.63	1.25	0.7	6.6	0	0	0	0	2.7	3.6	7.02	37.1	10.68	4.5	15.91	0	0	0	0	0	0	0	0	0
Peak_849	1	54122678	54122693	+			OK	OK	0	0	0	0.16	0	0.57	0.16	0	0	0	0	0	0	0	0	0	0	0	0	0	0	0	0	0	0	0	0	0	0	0	0	0	0	0	0.87	0	0	0	0	0	0
Peak_850	1	54227674	54227694	-	ENSBTAG00000022275	High	OK	OK	33.58	19.36	13.3	15.56	8.96	69.16	32.48	79.52	6.08	25.12	24.82	52.36	27.44	2.53	8.58	3.78	2.47	37.8	46.5	25.06	38.28	15.12	27.27	19.71	13.9	20.25	22.6	43.16	53.1	27.36	3	13.69	166.05	32.56	30.74	9.35	26.46	16.4	8.36	4.6	10.26
Peak_851	1	54543130	54543156	-			OK	OK	0.23	0	0	0	0.28	0	0	0	0	0	0.68	0	0	0	0	1.62	0	0	0	0.42	0	0	0	0	0.2	0	0	1.04	0	0	0	0	0	0	0	0	0	0	0.19	0	0
Peak_852	1	54849109	54849123	+			OK	OK	0	0	0	0.04	0	0.19	0.48	0.14	0	0.96	0	0	0.49	1.15	0.78	0	0.26	0.42	0.25	0	0.88	0.72	1.08	1.53	0.7	0	0	0	0.1	0.24	0	0.37	0.54	0.74	0	1.19	0	1.23	1.33	0	0.27
Peak_853	1	54952824	54952951	-			OK	OK	0	0	0	0	0	0	0	0	0	0	0	0	0	6.21	9.88	11.34	6.11	0	0	0	0	0	0	0	0.8	0	0	0	0	0	0	0	0	0	0	0	0	0	0	0	0
Peak_854	1	55309959	55309991	+			OK	OK	0	0	0	0	0	0	0	0	0	0	0	0	0	0	0	0	0	0	0	0	0	0	0	0	0	0	0	0	0	0	0	0	0	0	0	0	0	0	0	0	0
Peak_855	1	55457847	55457858	+	ENSBTAG00000033360	Low	OK	OK	0.23	0	0	0.08	0	0	0	0.14	0	0	0	0	0	0.23	0	0	0	0	0	0	0	0	0	0	0.2	0	0	0.26	0	0	0	0	0	0	0	0	0.42	0	0	0	0
Peak_856	1	55503512	55503518	+			OK	OK	0	0	0	0	0	0	0	0	0	0	0	0	0	0	0	0	0	0	0	0	0	0	0	0	0	0	0	0	0.8	0.84	0	0.74	0	0	0	0	0	0	0	0	0
Peak_857	1	55687007	55687017	-			OK	OK	0	0	0	0	0	0	0	0	0	0	0	0	0	0	0	0	0	0	0	0	0	0	0	0	0	0	0	0	0.2	0	0	0.37	0	0	0	0	0	0	0	0	0
Peak_858	1	55837580	55837604	-			OK	OK	0	0	0	0	0	0	0	0	0	0	0	0	0	0	0	0	0	0	0	0	0	0	0	0	0	0	0	0	0	0	0	0	0	0	0	0	0	0	0	0	0
Peak_859	1	55892951	55892975	-	ENSBTAG00000054558	Low	OK	OK	0	0	0	0	0	0	0	0	0	0	0	0	0	0.46	0	0.54	0.13	0	0	0	0	0	0	0	0.5	0	0	0.78	0	0	0	0	0	0	0	0	0	0	0	0	0
Peak_860	1	55893361	55893384	+	ENSBTAG00000013769	Low	OK	OK	0	0	0	0.2	0	0	0	0	0	0	0.51	0	0.49	0	0	0	0	0	0	0	0	0	0	0.09	0	0	0.1	0	0.1	0	0	0	0	0	0	0	0	0	0	0	0
Peak_861	1	55893899	55894039	+	ENSBTAG00000013769	High	OK	OK	0.69	0	0.98	0	0	0	0	0	0	0	0	0	0	0.92	0	0	0	1.26	2.5	1.12	0.66	0	0	0	0	0	0.9	1.04	0.7	2.16	0.5	0.74	0	0	0	0	0	0	0	0	0.54
Peak_862	1	55918344	55918347	+			OK	OK	0.23	0	0	0	0	0	0	0	0	0	0	0	0	0	0	0	0	0	0	0	0	0	0	0	0	0	0	0	0	0	0	0	0	0	0	0	0	0	0	0	0.27
Peak_863	1	55958111	55958120	+			OK	OK	0	0	0	0	0	0	0	0	0	0	0	0	0	0	0	0	0	0	0	0	0	0	0	0	0	0	0.2	0	0	0	0	0.37	0	0	0	0	0	0	0	0.4	1.08
Peak_864	1	55963955	55963969	+			OK	OK	0.46	0	0.14	0	0	0	0	0	0.64	0	0	0	0	0.69	0	0	0	1.26	0	0	1.1	0	0	0	0	0	0.1	0	1	0.24	0	0.74	0	0	0	0	0	0	0	0	0
Peak_865	1	55999095	55999113	+			OK	OK	0	0	0	0	0.28	0	0	0.14	0	0.32	0	0	0	0.23	0	0.54	0	0	0	0.14	0	0	0	0	0.3	0	0.1	1.56	0	0.84	0	0	0	0	0	0.17	0	0	0.38	0.6	0
Peak_866	1	56306145	56306252	+	ENSBTAG00000014441	High	OK	OK	0	0.22	0.56	0.04	0	0	0.32	0	0	0.16	0	0.68	0.49	0	0	0	0	5.25	5.25	4.9	6.6	0	0	0.09	0	11.25	8.2	23.4	2	0.24	0.5	0	0	0	0.58	0	0	1.23	0.19	0	0
Peak_867	1	56344690	56344767	-	ENSBTAG00000046637	Low	OK	OK	0	0	0	0	0	0	0	0	0	0	0	0	0	0	0	0	0	0	0	0	0	0	0	0	0	0	0	0	0	0	0	0	2.97	2.96	0	0	0	0	0	0	0
Peak_868	1	56424143	56424226	+	ENSBTAG00000012646	High	OK	OK	0.69	0.77	0.98	0.52	0	1.14	0.32	0	0.64	0.64	0	0	1.96	0.23	0	0	0.13	0	0.25	0.98	0.88	0	0	0.36	0	0.9	0.5	2.08	0.3	0.12	0.5	0.74	0.54	0	0	0	0	0.41	0.76	0	0
Peak_869	1	56425437	56425533	+	ENSBTAG00000012646	High	OK	OK	3.91	1.87	5.6	4.36	5.6	2.85	4.64	5.32	5.76	4.8	2.38	4.08	8.33	21.62	14.82	32.4	11.18	1.68	5.5	1.54	5.72	5.76	4.05	6.66	7.2	3.6	4.5	8.84	0.3	1.44	0	0	5.94	7.03	4.06	2.21	2.94	1.23	1.52	10.2	5.94
Peak_870	1	56486615	56486730	+	ENSBTAG00000001209	High	OK	OK	5.29	16.28	3.64	0.04	0	0	0.48	0	0	0	0	0	0	0	0	0	0	1.26	1.25	0.42	1.32	0.72	0	0.36	0.7	5.4	2.3	5.46	0.3	4.2	0	1.11	0	0	0	21.59	29.4	41	33.44	0	1.35
Peak_871	1	56488735	56488891	+			OK	OK	0	0.22	0	0	0	0	0	0	0	0	0	0	0	0	0	0	0	0	0.25	0	0.88	0	0	0	0	0	0	0.78	0	0.12	0	0.37	0	0	0	0.17	0.84	0	0.95	0	0
Peak_872	1	56492860	56492870	+			OK	OK	0	0	0	0	0	0	0	0	0	0	0	0	0	0	0	0	0	0	0	0	0	0	0	0	0	0	0	0	0	0	0	0	0	0	0	0	0	0	0	0	0
Peak_873	1	56573816	56573829	+			OK	OK	0	0	0	0	0	0	0	0	0	0	0	0	0	0	0	0	0	0	0	0	0	0	0	0	0	0	0	0	0	0	0	0	0	0	0	0	0	0	0	0	0
Peak_874	1	56588144	56588148	+			OK	OK	0	0	0	0	0	0	0	0	0	0	0	0	0	0	0	0	0	0	0	0	0	0	0	0	0	0	0	0	0	0	0	0	0	0	0	0	0	0	0	0	0
Peak_875	1	56607501	56607508	+	ENSBTAG00000001209	High	OK	Likely_false	0	0.11	0	0	0	0	0	0	0	0	0	0	0	0	0	0	0	0	0	0	0	0	0	0	0	0	0	0	0	0	0	0	0	0	0	0	0	0	0	0	0
Peak_876	1	56615051	56615056	+			OK	OK	0.69	0	0	0	0	0	0	0	0	0	0	0	0	0	0	0	0	0	0	0	0	0	0	0	0	0	0	0	0	0	0	0	0	0	0	0	0	0	0	0	0
Peak_877	1	56616511	56616877	+	ENSBTAG00000001209	High	OK	Likely_false	1.38	1.87	3.64	4.24	2.52	7.98	14.4	29.12	20.16	12.64	4.25	8.84	5.39	0	0.52	0	0.26	5.88	2	1.12	6.6	0.72	0.54	2.34	0.8	5.4	3	2.34	0	1.08	0	0.74	7.83	5.55	0.29	3.06	7.56	3.28	6.08	1.2	1.89
Peak_878	1	56617311	56617384	+	ENSBTAG00000001209	High	OK	Likely_false	0.92	1.54	1.26	11.36	10.36	9.69	19.36	13.3	10.56	15.04	9.35	10.2	12.25	0.92	0.26	0	0	3.78	4	0.84	4.84	1.44	0.81	2.07	0.5	3.6	1.9	1.82	0	0.96	0.25	0.74	3.51	8.14	0.87	2.21	7.14	2.05	4.18	1	0
Peak_879	1	56636112	56636115	+	ENSBTAG00000001209	Medium	OK	Likely_false	0	0.33	0.42	0.24	0.84	0.19	0.16	0.14	1.92	1.28	0.17	0	0	0.46	0	0	0	0.63	0	0.28	0	0	0	0	0	0	0	0	0	0	0	0	0	0	0	0.34	0	0	0.38	0	0
Peak_880	1	56657972	56657980	+	ENSBTAG00000001209	High	OK	Likely_false	0	0	0	0	0	0	0	0.7	0.96	0.48	0	0.68	0	0	0	0	0.13	0	0	0	0	0	0	0	0	0	0	0	0	0	0	0	0.27	0	0.58	0	0	0	0	0	0
Peak_881	1	56659470	56659479	+	ENSBTAG00000001209	Medium	OK	Likely_false	0	0	0	0	0	0	0	0.14	0	0	0	0	0	0	0	0	0.39	0	0	0	0	0	0	0	0	0	0	0	0	0	0	0	0	0	0	0	0	0	0	0	0
Peak_882	1	56677003	56677025	+			OK	OK	0	0	0.14	0.2	0	0.19	0.48	0	0.32	0.16	0	0	0	0	0	0	0	0	0	0	0	0	0	0	0	0	0.2	0	0	0	0	0	0	0	0	0	0.84	0	0.95	0	0
Peak_883	1	56718629	56718630	+	ENSBTAG00000001209	Low	OK	Likely_false	0	0	0.14	0	0	0	0	0	0.32	0.16	0	0	0	0	0	0	0	0	0	0	0	0	0	0	0	0	0.4	0	0	0	0	0	0	0	0	0.17	0	0	0.38	0.2	0
Peak_884	1	56737528	56737633	+	ENSBTAG00000004601	High	OK	OK	17.71	6.05	18.9	11.48	3.36	26.22	17.12	25.34	6.72	30.56	13.94	31.96	28.91	34.27	18.46	40.5	13.78	14.49	15.25	4.06	22.22	61.56	46.44	45.45	58.2	13.95	14.1	24.44	9.7	7.32	2.75	5.18	19.44	26.64	19.43	46.24	31.08	52.89	43.51	13.6	17.55
Peak_885	1	56759158	56759508	+	ENSBTAG00000004599	High	OK	OK	0.23	0.44	0.14	0.2	0	0	0.48	0	0	0	0	0	0.49	49.68	26.52	79.38	35.75	1.05	0.5	0.7	0.88	51.48	50.49	48.24	46.5	0.45	1.1	0.78	0.1	1.08	0	0.37	1.62	2.59	2.03	0.51	2.52	0.41	0.57	6	4.05
Peak_886	1	56759669	56759861	+	ENSBTAG00000004599	High	OK	OK	0.23	0.33	0.42	0.08	0	0.38	0.48	0.28	0	0.16	0.17	0.68	0	84.41	50.96	67.5	45.5	0.63	0.25	0	0.44	161.28	142.02	159.3	136.4	0	0.6	0.52	0.3	0.48	0	0	1.35	1.85	2.03	0.68	1.68	0	0.76	11.8	9.99
Peak_887	1	56777149	56777157	+			OK	OK	0	0	0	0	0	0	0	0	0	0	0	0	0	0	0	0	0	0	0	0	0	0	0	0	0	0	0	0	0	0	0	0	0	0	0	0	0	0	0	0	0
Peak_888	1	56779414	56779467	-			OK	OK	0	0	0	0	0	0	0	0.28	0	0	0	0	0	0.46	0.78	3.24	1.17	0	0	0	0	3.24	1.89	1.53	2.3	0	0	0	0	0.12	0	0	0	0	0	0	0	0	0	0.4	0.81
Peak_889	1	56882868	56883017	+	ENSBTAG00000016554	High	OK	OK	7.13	4.51	4.76	0	0	0	0	0	0	0.16	0	0	0	0	0	0	0	12.39	19.75	3.5	18.26	0	0	0	0	35.55	14.9	25.48	5.2	8.88	2.25	2.96	0	0	0	0	0	0	0.19	0	0
Peak_890	1	56927096	56927122	-			OK	OK	0	0	0	0	0	0	0	0	0	0	0	0	0	0	0	0	0	0	0	0	0	0	0	0	0	0	0.6	0.26	0	0	0	0	0	0	0	0	0	0	0	0	0
Peak_891	1	56933918	56933944	-	ENSBTAG00000048550	High	OK	Likely_false	0	0	0	0	0	0	0	0	0	0	0	0	0	0	0	0	0	0	0	0.14	0	0	0	0	0	0	0.3	1.04	0	0	0	0	0	0	0	0	0	0	0	0	0
Peak_892	1	56944256	56944398	-	ENSBTAG00000048550	High	OK	OK	0.23	0.22	0.14	0.24	0	0.76	0.48	0	0	0	0.34	0	0.98	0	0	0	0	2.73	8	3.22	10.34	0	0	0	0	13.5	13.9	29.12	1.6	2.04	1	0.74	0.27	0	0.58	0	0	2.05	0	0	0
Peak_893	1	57028695	57028764	+			OK	OK	0	0	0	0	0	0	0	0	0	0	0	0	0	0	0	0	0	0	0	0	0	0	0	0	0	0	0	0	0	0	0	0	0	0	0	0	0	0	0	0	0
Peak_894	1	57065499	57065593	-	ENSBTAG00000019332	High	OK	OK	0	0	0.14	0.16	0	0.57	0.16	0.28	0	0	0.17	0	0	0.46	0	0.54	0	1.05	0.5	0.14	1.1	0	0	0.27	0	1.35	1.6	2.86	1.1	0.12	0.25	1.11	0	0	0	0	0	0	0	0	0
Peak_895	1	57065871	57065945	-	ENSBTAG00000019332	High	OK	OK	0	0	0	0	0	0	0	0	0	0	0	0	0	0	0	0	0	0	0.25	0.14	0	0	0	0	0	0	0	0.26	0	0	0.25	0	0	0	0	0	0	0	0	0	0
Peak_896	1	57066017	57066047	+			OK	OK	0	0	0	0	0	0	0	0	0	0	0	0	0	0	0	0	0	0.42	0.25	0.42	1.1	0	0	0	0	0.45	0.4	1.56	0.1	0	0	0	0	0	0.58	0	0	0	0	0	0
Peak_897	1	57075207	57075230	+	ENSBTAG00000033319	Low	OK	OK	0	0	0	0.04	0	0	0.16	0	0	0.16	0	0	0	0	0	0	0	0	1	0.14	0.44	0	0	0	0	0	0.9	0.78	1.1	0	0	0	0	0	0.29	0	0	0	0	0	0
Peak_898	1	57076850	57076968	+	ENSBTAG00000033319	High	OK	OK	0	0	0	0.08	0	0	0	0	0	0	0	0	0	0	0	0	0	3.57	5.5	7.28	19.36	0	0	0	0	9.45	6.4	15.34	49.8	10.68	15	9.25	0	0	0	0.17	0	0	0	0	0
Peak_899	1	57088349	57088405	-	ENSBTAG00000019332	Medium	OK	OK	0	0	0	0	0	0	0	0	0	0	0	0	0	0	0	0	0	0	0	0	0	0	0	0	0	0	0	0	0	0	0	0	0	0	0	0	0	0	0	0	0
Peak_900	1	57095767	57095781	+			OK	OK	0	0	0	0	0	0	0	0	0	0	0	0	0	0	0	0	0	0	0	0.42	0	0	0	0	0	0	0	1.56	0	0	0.75	0	0	0	0	0	0	0	0	0	0
Peak_901	1	57101815	57101820	+			OK	OK	0	0	0	0	0	0	0	0	0	0	0	0	0	0	0	0	0	0	0	0.14	0	0	0	0	0	0	0	0	0	0	0	0	0	0	0	0	0	0	0	0	0
Peak_902	1	57105571	57105582	+	ENSBTAG00000033319	Medium	OK	OK	0	0	0.42	0.2	0	0	0.16	0.28	0	0	0	0.68	0	0	0	0	0	0.42	0	0.14	0.66	0	0	0	0	0	0.2	0.26	0	0	0	0.37	0	0	0	0	0	0	0	0	0
Peak_903	1	57126502	57126589	+	ENSBTAG00000033319	High	OK	OK	0.23	0.55	1.4	25.24	7.56	20.71	43.36	4.06	1.92	6.08	37.74	104.72	88.2	48.99	37.96	35.1	21.84	2.73	2.5	0.7	3.08	53.28	45.09	66.06	65.5	2.7	1.9	4.68	1.2	0.96	0.5	0	5.13	7.77	3.77	4.76	10.08	1.64	7.98	5.2	14.58
Peak_904	1	57126972	57127089	-			OK	OK	0	0.11	0.28	0.84	0.56	0.38	0.32	0.14	0.64	0	0.17	2.72	0.49	1.84	2.34	2.7	0.91	0	0	0	0	2.52	1.08	2.07	0.9	0	0	0	0	0	0	0	0	0	0	0	0	0	0	0.8	0.81
Peak_905	1	57148369	57148381	+			OK	OK	0	0	0	0.12	0	0	0	0	0	0	0	0	0	0.46	0	0	0	0	0	0	0	0.36	0	1.44	1	0	0.2	0	0.2	0	0	0	0	0	0	0	0	0	0	0	0
Peak_906	1	57258210	57258395	-	ENSBTAG00000011871	High	Low_H3K4me3	OK	0.69	0.22	0	0	0	0	0	0	0	0	0	0	0	0	0	0	0	1.47	0	0	0.66	0	0	0	0	0.45	1.2	1.82	1.2	0.6	0	1.48	0	0	0	0	0	0	0	0	0
Peak_907	1	57261623	57261738	-	ENSBTAG00000011871	High	OK	OK	0	0	0	0	0	0	0	0	0	0	0	0	0	0	0	0	0	0.63	0.25	0.56	0	0	0	0	0	0	1.4	0.78	0.4	0.48	0	0	0	0	0	0	0	0	0	0	0
Peak_908	1	57314926	57314935	-			OK	OK	0	0	0	0	0	0	0.16	0	0	0	0.17	0	0	0	0	0	0.26	0	0	0	0	0	0	0.18	0	0	0.3	0	0	0	0	0	0	0	0	0	0	0	0	0	0
Peak_909	1	57315861	57315952	-			OK	OK	0.46	0.11	1.4	0.24	0	0.19	0	0.56	0.32	0.16	0.34	0	0	0.23	0	0	0	0.21	0.25	0	1.54	0.72	0	0.27	0.4	0	0.9	0.26	0	0.12	0.75	0	0	0	0	0.17	0	0	0.19	0.2	0.54
Peak_910	1	57325570	57325590	-	ENSBTAG00000009084	High	OK	Likely_false	0	0	0	0.04	0	0	0	0	0	0	0	0	0	0	0	0	0	0	0	0	0	0	0	0	0	0	0	0	0	0	0	0	0	0	0	0	0	0	0	0	0
Peak_911	1	57329031	57329041	-			OK	OK	0	0	0.14	0	0	0	0	0	0	0	0	0	0	0	0	0	0	0	0	0	0	0	0	0	0	0	0.1	0	0	0.12	0	0	0	0	0	0	0	0	0.19	0	0
Peak_912	1	57336482	57336501	-	ENSBTAG00000009084	High	OK	Likely_false	0	0	0	1.12	1.12	0	0.96	0	0	0	0.68	0	0	0	0	0	0	0	0	0	0	0	0	0	0	0	0	0	0	0	0	0	0	0	0	0	0	0	0	0	0
Peak_913	1	57341341	57341433	-	ENSBTAG00000009084	High	OK	Likely_false	0	0	0	2.56	6.16	1.71	0.96	0	0	0	6.12	0	0.49	0	0	0	0	0	0	0	0.22	0	0	0	0	0	0	0	0	0	0	0.74	0	0	0	0	0	0	0	0	0
Peak_914	1	57343027	57343036	-	ENSBTAG00000009084	High	OK	Likely_false	0	0	0	0.28	0	0.57	0	0	0	0	1.53	0.68	0	1.61	1.56	0	0.65	0	0	0	0	0	0	0	0.2	0	0.3	0	0	0.36	0	0	0	0	0	0	0	0	0	0	0
Peak_915	1	57343376	57343727	-	ENSBTAG00000009084	High	OK	OK	108.79	81.4	18.76	65.6	38.64	89.11	218.24	44.1	18.88	21.76	131.24	140.76	77.91	76.13	80.6	58.32	70.85	54.18	61.5	8.4	42.46	84.6	109.35	73.53	58.3	113.85	51.6	83.72	58.4	55.32	19.5	38.85	61.02	37	8.99	52.19	58.8	46.33	42.56	19.4	251.37
Peak_916	1	57343773	57343883	+	ENSBTAG00000009085	High	OK	OK	13.11	8.91	5.74	10.96	1.68	14.06	12.48	14	2.88	13.76	3.4	29.92	11.27	33.81	16.9	19.98	13.39	6.93	7	2.24	12.98	35.64	32.13	35.64	37.1	16.2	8.8	15.34	2.1	8.28	3	6.66	8.1	9.99	13.63	7.14	8.82	10.66	8.36	7.8	14.58
Peak_917	1	57344024	57344076	-	ENSBTAG00000009084	Medium	OK	Likely_false	0.23	0.11	0	0.08	0	0	0.32	0	0	0	0.34	2.04	0	1.38	0.26	3.24	0.91	0.42	0.25	0.28	0	0.72	0.81	0.81	0.5	0	0.1	0.78	0	0	0	0	0	0	0	0	0	0.41	0	0.6	0
Peak_918	1	57344108	57344153	+	ENSBTAG00000009085	High	OK	Likely_false	0	0	0.28	0.92	0	1.52	0.48	0.98	0.32	0.64	0.34	0	0	4.37	2.6	2.16	2.6	0	0	0	0	2.88	3.24	5.49	4	0	0.5	0	0.2	0.36	0	0	0.27	0.74	0.58	0.51	0	0	1.33	1.4	0.54
Peak_919	1	57344499	57344506	-	ENSBTAG00000009084	Medium	OK	Likely_false	0	0	0	0	0	0	0	0	0	0	0	0	0	0	0	0	0	0	0	0	0	0	0	0	0	0	0	0	0	0	0	0	0	0	0	0	0	0	0	0	0
Peak_920	1	57345254	57345271	-	ENSBTAG00000009084	High	OK	Likely_false	0	0	0	0	0	0	0	0	0	0	0	0	0	0	0	0	0	0	0	0	0	0	0	0	0	0	0	0	0	0	0	0	0	0	0	0	0	0	0	0	0
Peak_921	1	57346193	57346194	+			OK	OK	0	0	0	0	0	0	0	0	0	0.32	0	0	0	0	0.78	0	0	0	0	0	0	0	0	0	0	0	0	0	0	0	0	0	0	0	0	0.17	0	0	0	0	0
Peak_922	1	57347060	57347082	+			OK	OK	0	0.22	0	0.04	0	0	0	0	0	0	0	0	0.98	0	0.78	0	0	0	0	0	0	0.36	0	0.18	0	0	0.2	0.78	0	0	0	0.37	0	0	0	0	0	0.41	0.57	0	0
Peak_923	1	57352831	57352843	+			OK	OK	0	0	0	0	0	0	0	0	0	0.32	0.17	0.68	0	0	0	0	0	0	0	0	0	0	0	0	0	0	0	0.78	0	0.6	0	0	0	0	0.58	0.17	0	0	0.19	0	0
Peak_924	1	57377180	57377326	-	ENSBTAG00000010793	High	Low_H3K4me3	Likely_false	0	0.33	0.98	1.64	4.76	4.37	1.12	2.1	1.92	2.24	0.51	0	0.49	0.46	0	1.08	0	0.63	0	0.14	0.44	0	0	0.18	0.2	0	0.7	0	0.1	0	0.25	0	1.89	0.37	0.58	0.68	0	1.23	0	0	0
Peak_925	1	57398571	57398572	-			OK	OK	0	0	0	0.08	0	1.9	0.32	0	0	0.16	0	0	0	0	0	0	0	0	0	0	0	0	0	0	0	0	0	0	0	0	0	0	0	0	0	0	0	0	0	0	0
Peak_926	1	57407113	57407216	-			OK	OK	0	0.22	0.14	0.08	0	0.38	0.16	0	1.92	0	0.51	0	0	0.46	5.72	0.54	1.04	0	0	0	0	0	1.35	0.27	0.2	0	0.1	0	0	0	0	0	0	0	0	0	0	0	0.38	0.4	1.08
Peak_927	1	57410012	57410148	-	ENSBTAG00000010793	High	OK	Likely_false	0	0.44	2.94	15.52	15.12	17.48	16.64	7.7	14.72	8.8	3.74	2.04	0.98	0.23	1.04	0.54	1.04	2.1	0.5	1.12	1.54	0	2.16	1.08	1.1	1.8	4.4	1.04	0	1.32	0.5	0.74	3.51	5.92	0.29	2.21	3.78	3.69	1.71	0.2	0
Peak_928	1	57411381	57411446	-	ENSBTAG00000010793	High	OK	Likely_false	0	0	0	0.92	0.28	5.32	0	0.14	0	0.64	1.02	0	0	0	0	0	0	0.84	0	0.56	0	0	0	0	0	0	0.1	0	0	0	0	0	0.54	0	0	0	0	0	0	0	1.08
Peak_929	1	57412516	57412624	-	ENSBTAG00000010793	High	OK	OK	4.83	7.48	31.22	204.72	110.32	158.65	229.12	80.92	69.44	141.92	153.85	133.96	122.99	18.4	21.06	9.18	7.15	27.72	12.75	3.92	24.42	36.72	35.37	37.35	25.4	15.3	19.1	18.98	3.6	9.84	3.25	1.85	108	134.68	42.34	11.22	19.32	17.63	13.11	5.8	6.75
Peak_930	1	57412904	57412931	-	ENSBTAG00000010793	High	OK	Likely_false	0	0	0	1.04	2.24	1.9	1.12	0.14	0.32	0	0.17	0	0	0	0	0	0	0	0.25	0	0.22	0	0	0	0	0	0.1	0	0	0.12	0	0	0.27	0	0.58	0	0	0	0	0	0
Peak_931	1	57423991	57423993	-	ENSBTAG00000010793	High	OK	Likely_false	0	0	0.14	1.4	0	4.37	0	0	0.96	0	0	0	0	0	0	0	0	0	0	0	0	0	0	0	0	0	0	0	0	0	0	0	0	0	0	0	0	0	0	0	0
Peak_932	1	57428417	57428419	-	ENSBTAG00000010793	High	OK	Likely_false	0	0	0	0	0	0	0	0	0	0	0	0	0	0	0	0	0	0	0	0	0	0	0	0	0	0	0	0	0	0	0	0	0	0	0	0	0	0	0	0	0
Peak_933	1	57477854	57478185	-	ENSBTAG00000010793	High	OK	Likely_false	0	0	1.26	5.68	2.8	29.83	12.48	2.94	0.96	5.92	0.17	0	0	0.23	0	0	0	0.42	0.25	0	0.22	0	0	0	0.1	0	0.7	0.26	0.1	0.48	0.25	0	12.42	4.44	1.45	0.68	0	1.23	0	0	0
Peak_934	1	57549291	57549314	+	ENSBTAG00000006534	High	OK	OK	0	0	0	0	0	0	0	0	0	0	0	0	0	0	0	0	0	0	0	0	0	0	0	0	0	0	0	0	0	0	0	0	0	0	0	0	0	0	0	0	0
Peak_935	1	57570133	57570135	+			OK	OK	0	0	0	0	0	0	0.64	0	0	0	0	0	0	0	0	0	0	0	0	0	0	0	0	0	0	0	0.1	0	0	0.12	0	0	0	0	0	0	0	0	0	0	0
Peak_936	1	57593436	57593447	-			OK	OK	0	0	0	0	0	0	0	0	0	0.16	0	0	0	0	0	0	0	0	0	0	0	0	0	0	0	0	0	0.26	0	0	0	0	0	0	0	0	0	0	0.19	0	0
Peak_937	1	57596774	57596797	-	ENSBTAG00000040144	Low	OK	OK	0	0	0	0.04	0	0.57	0.48	0.14	0	0	0	0	0	0	0	0	0	0	0	0	0	0	0	0	0	0	0	0	0	0	0	0	0	0	0	0	0	0.41	0	0	0
Peak_938	1	57599442	57599576	-	ENSBTAG00000040144	High	OK	OK	0.92	1.87	0.7	1	0.56	1.71	1.92	1.12	0.32	1.44	0.34	0.68	0.98	0	0	0	0	2.1	3.75	0.7	5.28	0	0	0	0	2.25	1.7	6.76	1.8	0.84	0.75	0.74	5.13	1.85	0	0	0.84	0.82	0.19	0	0
Peak_939	1	57617069	57617096	-	ENSBTAG00000040144	Low	OK	OK	0	0	0	0	0	0	0	0	0	0	0	0	0	0	0	0	0	0	0	0.14	0	0	0	0	0	0.9	0.2	0	0	0	0	0	0	0	0	0	0	0	0	0	0
Peak_940	1	57627319	57627366	-			OK	OK	0.69	0	0.56	0.08	0	0	0	0	0	0	0	0	0	0	0	0	0	0.42	1.5	0.42	0	0	0	0	0	3.15	0.6	1.56	0.2	0.24	0	0	0.54	0	0	0	0	0	0	0	0
Peak_941	1	57681019	57681119	-	ENSBTAG00000001235	High	OK	OK	0.23	0.22	0.7	1.68	0.56	2.85	5.6	0.84	0	0.32	1.19	7.48	2.94	0	0	0	0.26	2.94	4.5	1.54	2.86	0	0.27	0.09	0.1	2.7	3.8	3.64	1.4	0.96	1.25	0.37	0.54	0	0.87	0	2.52	1.64	0.19	0	0
Peak_942	1	57685578	57685579	+			OK	OK	0	0	0	0	0	0	0	0	0	0	0	0	0	0	0	0	0	0	0	0	0	0	0	0	0	0	0	0	0.1	0	0	0	0	0	0	0	0	0	0	0	0
Peak_943	1	57707942	57708091	+	ENSBTAG00000006534	High	OK	OK	20.93	6.49	2.94	6.68	1.96	6.65	14.88	6.3	6.72	6.72	13.43	8.16	9.8	28.75	20.54	29.7	18.2	10.29	7	8.4	13.64	40.68	35.64	50.85	31.2	12.6	18.7	30.94	5.6	7.92	9	2.22	10.8	8.51	2.9	17.68	19.74	11.48	17.86	8	12.42
Peak_944	1	57739334	57739335	+			OK	OK	0	0	0.28	0.08	0	0	0.16	0.14	0	0	0.17	0.68	0	0	0	0	0	0	0	0	0	0	0	0.18	0.3	0	0	0	0	0	0	0	0	0	0	0.17	0	0	0.19	0	0
Peak_945	1	57740912	57741006	-	ENSBTAG00000005723	High	OK	OK	2.07	0.66	1.96	2	1.12	4.94	2.08	2.8	1.28	2.08	2.04	0.68	2.45	4.37	0.78	4.86	0.91	1.89	0.25	0.14	3.52	1.08	2.16	3.69	1.5	0.45	2.1	2.6	0.4	1.8	1	1.48	1.62	0.74	1.16	1.36	0.84	1.23	0.76	0.6	0
Peak_946	1	57799302	57799344	-	ENSBTAG00000000242	High	OK	OK	0.69	0.88	0.56	0.76	0.28	0.95	1.28	1.12	0.64	1.12	0.17	2.04	0.98	0.23	1.04	1.08	0.52	0.63	1.5	0.56	0.22	0	1.89	1.62	1.7	3.15	1.1	2.6	1.2	0.6	0	0.37	0.81	0.74	3.48	1.02	6.3	3.69	0.76	0.4	0.27
Peak_947	1	57822857	57822930	-	ENSBTAG00000000242	Low	OK	OK	0	0.22	0.56	3.68	0.28	4.94	4	3.08	0.64	2.88	0	0	0	0	0	0	0	1.26	1.5	0.14	0.88	0.36	0	0.18	0	0	0	0.78	0	0.48	0	0	0.27	0	0	0.51	0	0	0.19	0	0.27
Peak_948	1	57943445	57943464	+	ENSBTAG00000013909	Low	OK	OK	0	0	0	0	0	0	0	0	0	0.48	0	0	0.49	0	0	0	0	0	0	0	0	0	0	0	0.2	0	0.1	0	0	0	0	0	0.27	0	0	0	0	0	0	0	0
Peak_949	1	57944035	57944117	+	ENSBTAG00000013909	High	OK	OK	0	0.55	1.4	1.96	0	1.71	2.56	8.68	11.2	9.12	2.21	2.04	3.92	0.69	0.52	0	0	1.47	0.75	0.56	2.86	6.48	1.89	4.5	4	0	0.9	1.04	0	0.24	0	0.74	5.13	4.07	9.57	0.34	2.52	0.41	0.95	0.8	2.16
Peak_950	1	58014185	58014271	+	ENSBTAG00000013909	High	Low_H3K4me3	OK	0	0	0	3.24	0.28	1.9	26.72	0.7	2.56	0.32	2.04	2.04	0.98	0	0	0	0	0.21	0	0	0	0	0	0.18	0.2	3.6	0	0	0.1	0	0	0	0	0	0.29	0	0	0	0	0	0
Peak_951	1	58136552	58136624	-	ENSBTAG00000049524	High	OK	OK	0	0	0	0	0	0	0	0	0	0	0	0	0	0	0	0	0	0	0	0	0	0	0	0	0.1	0	0	0	0	0	0	0	0	0	0	0	0	0	0	0	0
Peak_952	1	58146281	58146293	-	ENSBTAG00000013937	Medium	OK	OK	0	0	0	0.04	0	0	0	0	0	0	0	0	0	0	0	0	0	0	0	0	0	0	0	0	0	0	0	0	0	0	0	0	0	0	0	0	0	0	0	0	0
Peak_953	1	58176516	58176542	-	ENSBTAG00000013937	High	OK	OK	0	0	0	0	0	0	0	0	0	0	0	0	0	0	0	0	0	0	0	0	0	0	0	0	0	0	0	0	0	0	0	0.37	0	0	0	0	0	0	0	0	0
Peak_954	1	58199647	58199684	-	ENSBTAG00000013937	High	OK	OK	0.69	1.21	0.84	0.2	0	1.33	0.48	0.7	0.64	0.16	0	0	0	0.46	0.52	0	0.13	0.84	0	1.4	1.98	1.8	0	1.26	1.4	0.9	2.6	2.6	0.2	0.36	1	1.11	0.54	0.37	0.29	0.17	0	0	0	0.4	0.81
Peak_955	1	58199834	58199914	-	ENSBTAG00000013937	High	OK	OK	73.14	33.66	70.84	42.28	25.48	45.03	38.56	51.52	75.2	86.56	47.77	40.8	69.09	61.41	31.98	72.9	27.56	59.64	57	59.78	61.16	70.56	45.09	90.18	45.8	94.5	129.7	154.44	22.7	52.32	42.25	28.86	33.48	62.9	37.12	16.49	18.06	40.18	34.58	50.2	64.26
Peak_956	1	58217982	58217993	+			OK	OK	0	0	0	0	0	0	0	0	0	0	0	0	0	0.23	0	0	0.13	0	0	0	0	1.08	0	0.36	0	0	0	0.26	0	0	0	0	0	0	0	0	0	0	0	0	0.81
Peak_957	1	58218197	58218373	+	ENSBTAG00000013292	High	OK	OK	13.8	10.45	15.96	0.08	0	0	0.16	0	0	0	0	0	0.49	17.02	4.16	14.04	3.9	4.83	11.25	3.08	9.24	12.24	3.78	11.07	7.5	24.75	17.9	28.86	0.8	3	2	1.11	0.27	0	0	0	0	0	0	0.8	0.27
Peak_958	1	58218718	58218935	+	ENSBTAG00000013292	High	OK	OK	7.59	7.81	5.88	0.08	1.12	0	0.16	0	0	0	0	0	0	60.72	39.78	31.32	28.99	1.47	3	1.96	4.18	113.4	79.65	114.93	70.1	6.3	4.1	7.28	1.4	7.08	0.75	1.85	0.27	2.22	0	0	0	0.41	0.38	2.2	7.83
Peak_959	1	58220324	58220338	-	ENSBTAG00000013937	High	OK	OK	0.46	1.32	1.4	0	0	0	0	0	0	0	0	0	0	0	0	0	0.13	0	0	0.7	0	0	0	0.45	0.2	0	0.2	2.86	0	0.24	0	0	0	0	0	0	0	0	0.19	0	0
Peak_960	1	58220531	58220545	-			OK	OK	0	0	0	0	0	0	0	0	0	0	0	0	0	0	0	0	0	0	0	0	0	0	0	0	0	0	0	0	0	0	0	0	0	0	0	0	0	0	0	0	0
Peak_961	1	58296732	58296748	+			OK	OK	0	0	0	0	0	0	0	0	0	0	0	0	0	0	0	0	0	0	0	0	0	0	0	0	0	0	0	0	0	0	0	0	0	0	0	0	0	0	0	0	0
Peak_962	1	58323453	58323458	+	ENSBTAG00000013292	High	OK	OK	0	0	0	0	0	0	0	0	0	0	0	0	0	0	0	0	0	0	0	0	0	2.16	0	0.72	1.2	0	0	0	0	0	0	0	0	0	0	0	0	0	0	0	0
Peak_963	1	58343224	58343230	-			OK	OK	0	0	0	0	0	0	0	0	1.28	0	0	0	0	0	0	0	0	0	0	0	0	0.36	0	0	0.4	0	0.5	0	0.1	0.12	0	0	0	0	0	0	0	0	0	0	0
Peak_964	1	58349643	58349659	-	ENSBTAG00000021000	Medium	OK	OK	0	0	0.28	0.08	0	0	0	0	0	0.16	0.51	0	0	0.23	0	0	0	0	0	0	0	0.36	0	0	0.1	0	0.2	0	0	0	0.5	0	0	0	0	0	0	0	0	0	0.27
Peak_965	1	58350363	58350391	-	ENSBTAG00000021000	High	OK	OK	0.46	0.11	0.56	0.08	0	0	0.32	0	0.64	0	0	0	0	0.69	4.42	0	0.13	0.21	0	0	0	0	0	2.34	0.8	0	0.6	0	0	0	0	0	0.27	0	0	1.53	1.26	0	1.14	0	0
Peak_966	1	58351628	58351637	-	ENSBTAG00000021000	Medium	OK	OK	0	0	0	0	0.56	0	0	0	0.64	0	0	0	0	0	0	0	0	0	0.75	0.56	0	0	0	0	0.2	0	0.1	0.26	0.1	0	0	0	0	0	0	0.34	0	0	0	0	0
Peak_967	1	58362329	58362342	-	ENSBTAG00000021000	Medium	OK	OK	0	0	0	0	0	0	0	0	0	0.16	0	0	0	0	0	0	0	0	0	0	0	0	0	0	0	0	0.2	0	0	0	0	0	0	0	0.58	0	0	0	0	0	0
Peak_968	1	58391648	58391679	-			OK	OK	0	0.33	0	0.08	0	0	0	0	0	0	0	1.36	0	0.46	0	0	0	0	0	0	0	0.72	1.89	0.72	0.1	0.45	0	0	0	0.24	0	0	0	0	0	0	0	0	0	0	0.27
Peak_969	1	58391725	58391752	+			OK	OK	0	0	0	0.08	0	0	0	0	0	0	0	0	0	0	0	0	0	0	0	0	0	0	0	0.18	0.4	0	0	0	0	0	0	0	0	0	0	0	0.84	0	0	0.2	0
Peak_970	1	58391902	58392069	-	ENSBTAG00000021000	High	OK	OK	9.89	6.82	10.78	9	6.44	10.45	7.36	15.12	3.84	17.12	17.34	9.52	10.29	16.56	11.7	14.04	5.2	14.91	18	7.56	15.4	30.24	24.57	40.95	23.3	10.8	15.8	26.26	6.5	6.12	3.25	4.44	12.69	17.39	14.5	5.27	4.2	7.38	9.69	4.8	9.72
Peak_971	1	58392368	58392453	+			OK	OK	2.07	2.09	1.12	0.4	0	1.52	2.24	1.54	0	1.12	0.85	2.04	0.49	0.23	1.82	0.54	1.04	1.89	4.75	0.42	2.86	3.96	2.16	2.16	2.1	1.8	2.5	2.6	1.8	1.44	0.25	1.48	1.08	0.74	1.16	1.19	2.1	1.64	0.19	0.8	2.16
Peak_972	1	58401963	58401978	-			OK	OK	0.23	0.11	0.14	0.04	0	0.38	0.32	0.14	0	0	0.34	0.68	0	0.23	0.78	1.08	0.26	1.05	0.75	0	0	0.36	0	0.27	0.2	0.45	0.2	0.52	0	0	0	0	0	0	0.58	0.34	0	1.23	0.38	0.8	0
Peak_973	1	58403243	58403250	-	ENSBTAG00000007784	High	OK	OK	1.15	0	0	0.04	0	0	0.16	0.42	1.28	0.16	0.34	0	0	0.23	0	0	0	0.63	0	0	0	0.72	0	0.81	0.7	0	0	0.52	0.5	0	0	0	0	0	0.29	1.36	0.42	1.64	0.95	0	0
Peak_974	1	58403680	58403688	-	ENSBTAG00000007784	High	OK	OK	0	0.33	0.56	0.04	1.68	0	0	1.4	0.64	0.8	0	0	0	0.69	1.56	0	0	0	0	0.14	0.44	0	0	0.18	0.4	0	0.2	0	0	0	0	0	0.27	0	0	0	0	0	0.19	0.6	0
Peak_975	1	58407025	58407038	-	ENSBTAG00000007784	Low	OK	OK	0	0	0	0	0	0	0	0.14	0	0.16	0	0	0	0	0	0	0	0	0	0	0	0	0	0.09	0	0	0	0	0	0	0	0	0	0	0	0	0	0	0	0	0
Peak_976	1	58413925	58413935	-			OK	OK	0	0	0.14	0	0	0	0.16	0	0	0	0	0	0	0.23	0	0	0	0	0	0.7	0	0	0	0	0	0	0.3	0	0	0.24	0	0	0	0	0	0.17	0	0	0	0	0
Peak_977	1	58433029	58433055	+			OK	OK	0	0	0	0	0	0	0.64	0	0	0	0	0	0	0	0	0	0	0	0	0	0	0	0	0	0	0	0	0	0	0	0	0	0	0	0	0	0	0	0	0	0
Peak_978	1	58433696	58433832	-	ENSBTAG00000007784	High	OK	OK	70.15	26.84	32.76	35.12	24.08	37.24	49.92	50.12	27.84	66.24	44.2	48.28	32.83	33.81	14.56	50.76	15.99	31.71	22	20.16	38.5	59.4	30.78	48.78	52.8	39.15	33.4	44.2	23.8	28.92	15	19.24	69.12	58.09	74.53	54.74	68.04	35.26	41.04	10.6	14.85
Peak_979	1	58433917	58433934	+	ENSBTAG00000002703	Low	OK	OK	0	0	0	0.12	0	1.52	0.16	0.14	0	0.16	0	0	0	0.23	0	0	0	0	0	0	0	0	0	0.27	0.3	0	0	0.26	0	0	0	0	0	0	0	0	0	0	0	0	0
Peak_980	1	58434290	58434338	-	ENSBTAG00000007784	High	OK	OK	0.46	0.88	0.28	0.2	0	0.19	0.8	0.28	0.32	0.16	0.17	0.68	0	0.69	2.34	2.16	0.78	0	0	0.14	0.22	0.72	1.35	0.72	1.2	0.45	0	0.78	0.4	1.08	0	0.74	1.08	0	0.29	0.51	0	0.82	0.38	0	0.54
Peak_981	1	58434375	58434614	+	ENSBTAG00000002703	High	OK	OK	8.28	8.58	2.52	7.48	5.04	8.55	7.2	9.38	1.6	11.36	11.05	29.24	10.29	61.87	28.86	60.48	18.98	7.14	8.5	3.78	8.8	52.56	39.69	71.82	75.8	5.4	5.3	10.66	5.9	5.76	1	5.92	11.61	4.44	2.61	2.04	2.1	7.79	2.28	12.2	9.99
Peak_982	1	58491054	58491070	+	ENSBTAG00000002703	High	OK	OK	0.23	0	0.28	0	0	0	0	0.14	0.32	0	0	1.36	0	0.46	0	0	0.39	0	0	0	0	0.36	0.54	0.63	0.6	0	0.5	0.78	0	0	0	0	0	0	0	0	0	0	0.38	0.2	0.27
Peak_983	1	58518770	58518946	+	ENSBTAG00000004971	High	OK	OK	8.74	3.63	7.98	4.92	3.08	5.51	5.12	4.62	2.88	7.36	6.97	12.92	16.17	3.91	2.34	5.94	2.21	9.66	18.25	6.02	12.76	2.52	2.97	5.4	4.5	10.8	7.6	23.4	5	6.24	1.5	3.7	4.86	6.66	2.32	2.38	9.24	7.38	2.85	3.2	1.89
Peak_984	1	58554818	58554835	-			OK	OK	0	0	0	0	0	0	0	0	0	0	0	0	0	0	0	0	0	0	0	0	0	0	0	0	0	0	0	0	0.3	0	0	0	0.27	0	0	0.17	0	0	0	0	0
Peak_985	1	58557666	58557680	+			OK	OK	0	0	0.28	0	0	0	0	0	0	0	0	0	0	0	0	0	0	0	0	0	0	0	0	0	0	0	0	0	1.2	0.12	0	0	0	0	0	0	0	0	0	0	0
Peak_986	1	58576326	58576375	+	ENSBTAG00000004971	High	OK	OK	1.38	0.88	1.26	0	0	0	0	0	0	0	0	0	0	0	0	0	0	1.26	2	0.14	1.32	0	0	0	0	2.25	0.3	2.08	1.2	1.32	0	0.37	2.97	1.48	0	0	0	0	0	0	0
Peak_987	1	58618946	58619073	+	ENSBTAG00000004974	High	OK	OK	4.14	2.31	3.08	0.48	0.28	1.33	0.32	0.7	0	0.64	1.36	0.68	0	1.61	1.3	0.54	0.78	1.26	6.5	2.38	2.42	0	1.35	1.08	1.7	4.05	3.5	5.98	2	0.36	1.5	0.37	0	0.74	0.87	0.34	0	0	0.76	0	0
Peak_988	1	58619305	58619352	+	ENSBTAG00000004974	High	OK	OK	0.46	0	0.28	0	0	0	0	0	0	0	0	0	0	0.23	0	1.62	0.13	0.42	1	0	0.44	0	0	0.63	0.1	0.9	1	1.04	0.1	0	0	0	0	0	0	0	0	0	0	0	0.27
Peak_989	1	58670721	58670752	-	ENSBTAG00000004975	High	OK	OK	0	0	0	0	0	0	0	0	0	0	0	0	0	0	0	0	0	0	0	0	0	0	0	0	0	0	0	0	0	0	0	0	0	0	0	0	0	0	0	0	0
Peak_990	1	58734817	58734902	+	ENSBTAG00000004977	High	OK	OK	0	0	0.14	0	0	0	0	0.42	0.64	0.48	0	0	0	2.53	0.78	5.4	1.3	0	0	0.14	0	0.36	1.35	1.35	0.7	0	0	0	0	0	0	0	0	0	0	0	0	0	0.19	0.2	0
Peak_991	1	58735022	58735105	-	ENSBTAG00000004975	High	OK	OK	2.53	2.42	1.4	0.16	0	1.33	2.72	3.22	5.12	2.08	1.19	0.68	1.96	0.69	2.34	6.48	5.46	2.1	1.75	0.56	0.44	5.76	6.75	1.62	5.6	1.8	2.6	4.68	1	1.68	0.5	0	2.16	0.74	0.87	0.85	1.68	2.87	1.14	2.8	1.62
Peak_992	1	58735281	58735373	+	ENSBTAG00000004977	High	OK	OK	3.91	2.53	4.2	3.84	3.36	3.42	4.64	6.16	2.88	11.36	3.57	6.12	9.31	8.05	4.94	8.1	4.29	5.46	5.25	3.5	4.62	4.32	2.97	6.3	4.2	8.55	6.5	8.84	4.1	3.84	1.25	5.18	3.51	1.48	1.74	1.19	0.84	3.69	1.52	1.6	4.32
Peak_993	1	58926810	58926886	+	ENSBTAG00000011921	High	OK	OK	0	0	0	0	0	0	0	0	0	0	0	0	0	0	0	0	0	0.21	0	0.42	0	0	0	0	0	1.35	1.1	0.78	0	0	0.75	0	0	0	0	0	0	0	0	0	0
Peak_994	1	58953332	58953344	-			OK	OK	0	0	0	0	0	0	0	0	0	0	0	0	0	0	0	0	0	0	1	0	0	0	0	0	0	0	0	0	0.1	0	0	0	0	0	0	0	0	0	0	0	0
Peak_995	1	58953931	58953953	-			OK	OK	1.15	0.11	0	0.4	0	0	0.32	0.56	0	0.96	0.17	0	0	0.23	0	1.08	0.13	0.63	0	0.14	0.22	0	0	0.99	0.7	0	0.1	0.26	0	0	0	0	0.81	0	0	0.17	0	1.64	1.14	0.4	0.54
Peak_996	1	58954675	58954697	-			OK	OK	0	0	0	0	0	0	0	0	0.32	0.32	0	0	0	0	0	0	0	0	0	0	0	0.72	0.27	0.09	0.2	0	0	0.26	0	0	0	0	0	0	0	0	0	0.41	0.76	0	0
Peak_997	1	58956456	58956526	-			OK	OK	0	0.44	0.56	0.12	0	0	0	0	1.6	0	0	0	0	0	0	0	0.39	0	0	0.42	0	1.08	0	0	0.6	0	0	0	0.1	0	0	0	0.27	0	0	0.68	0	0.41	0.76	0	0
Peak_998	1	58957086	58957101	-			OK	OK	0	0	0	0	0	0.19	0	0	0	0.64	0	0	0	0.23	0	1.62	0	0	0	0	0	0	0	0	0.1	0	0	0	0.1	0	0	0	0	0	0	0.17	0	0.41	0.38	0.2	0
Peak_999	1	58957553	58957554	-			OK	OK	0	0.55	0	0.08	0	0	0	0	0	0.16	0	0	0.98	0.23	0	0	0	0.21	0	0	0	0.72	0	0.18	0.2	0	0	1.3	0	0	0.25	0	0.27	0	0.29	0.51	0	0	0.76	0.8	0
Peak_1000	1	58958650	58958667	-			OK	OK	0	0.11	0.42	0.32	0	0.95	0.64	0.28	0.32	1.12	0.34	1.36	0	0.69	1.3	0.54	0	0	0	0.28	0.44	2.88	0	0.45	2.6	0	0.3	1.04	0	0	0	0	1.08	0	0	1.36	0	0	3.04	1.6	0
Peak_1001	1	58963941	58964046	-			OK	OK	0	0.33	0.42	0.24	0	0	0.48	0	0.96	0.16	0	0.68	0	0.46	0	0	0.13	0.63	0	0.14	0	0	0	0.09	0.1	0	0.1	0	0	0	0.25	0.37	0	1.85	0	0.51	0	0	0.57	0	0
Peak_1002	1	58964437	58964574	-			OK	OK	0	1.76	0.7	0.24	0	0	1.6	0.98	0.96	0	0	2.72	0	0	3.64	0	1.17	1.47	2.75	0	0.22	1.8	0	0.27	1.1	0	1.1	0	0	0	0	0	2.43	0	0	1.19	0	0	0.38	0	0
Peak_1003	1	58966303	58966442	-			OK	OK	0.46	0.11	0.28	0.04	0	0	0.8	0.84	1.92	0.16	0	0	0	0	0	0	0.39	0	0	0.14	0.44	0	0	0.18	0.4	0	0.6	0	0	0.12	0.25	0	0	0	0	0.17	0	0.82	0.19	0	0
Peak_1004	1	58966790	58966802	-			OK	OK	0.92	0.44	0	0.36	1.12	0.19	0.16	0.14	2.88	0	0	0	0.98	0	0	0	0	0.21	0	0	0	1.08	0	0.36	0.6	0	0.1	0.52	0	0.24	0	0	0	0	0	0.17	0	0.82	1.71	0	0
Peak_1005	1	58966953	58966967	-			OK	OK	0	0.22	0.14	0	0	0	0.32	0	1.28	0.16	0.51	0	0	0	0.26	0	0	0	0	0	0	0	0	0	0.7	0	0	0	0	0	0.5	0	0	0	0	0.34	0	0	0.76	0	0
Peak_1006	1	58967149	58967160	-			OK	OK	0	0	0	0	0	0	0	0	0.32	0	0	0	0	0	0	0	0	0	0	0	0	1.08	0	0	0.4	0	0	0	0	0	0	0	0	0	0	0.17	0	0	0	0	0
Peak_1007	1	58968554	58968671	-			OK	OK	0	0.22	0.14	0.4	1.4	0.57	0	0.28	4.48	0.8	0.34	0	0	0	0	0	0.26	0	0	0.14	0.22	0.36	0	0.18	0.3	0.45	0.7	0	0.2	0	0	0	0	0	0	0.34	0	0.41	1.52	0	0
Peak_1008	1	58969658	58969672	-			OK	OK	0	0	0.84	0.16	0	0	0	0	0.32	0.16	0	0	0	0	0	0	0	0	0	0.14	0	0	0	0	0	0	0.3	0	0	0	0	0	0	0	0	0	0	0	0	0	0
Peak_1009	1	58970627	58970696	-			OK	OK	0	0.22	0.28	0.16	0	0	0.16	0.42	1.92	0.48	0.34	1.36	0	0.23	1.56	1.08	0.91	0.21	0	0.28	0	1.08	0	0.27	0.8	0	0.7	0	0	0	0	0	0	2.22	0	1.36	0	0	0.95	0.2	0.27
Peak_1010	1	58971125	58971144	-			OK	OK	0.23	0.22	0	0.12	0	0.19	0.16	0.56	0.96	0.16	0	0	0	0	0	0.54	0.13	0.84	0	0	0.66	0.36	0	0.45	1.5	0	0.1	0	0	0	0	0	0.54	1.48	0	0.34	0	1.23	1.71	0	1.08
Peak_1011	1	58972339	58972367	-			OK	OK	0.23	0.11	0	0.68	0	2.28	0	0.42	0.32	2.24	0.34	0	0	2.99	0	2.16	0.13	0.21	0	0.14	0	2.52	0	4.59	3.6	0	0.1	0.26	0	0	0	0	0	2.22	0	0.68	0	2.05	3.04	4	0
Peak_1012	1	58973601	58973604	-			OK	OK	0	0	0	0.08	0	0	0.48	0	0	0	0	0	0	0	0	0	0	0	0	0	0	0	0	0	0.1	0	0	0	0	0	0	0	0	0	0	0	0	1.64	0.95	0	0
Peak_1013	1	58974235	58974249	-			OK	OK	0	0.22	0	0	0	0	0	0	0.32	0.16	0	0	0	0	0	0	0	0	0	0	0	0	0	0.09	0	0	0.1	0	0	0	0	0	0	0.74	0	0.17	0	0.41	0	0	0
Peak_1014	1	58975108	58975154	-			OK	OK	0	0	0	0.72	0	0.38	1.12	0.42	0.64	2.4	0.68	0.68	0	0.23	0	0	0.13	0.42	0.25	0.14	1.1	1.44	0.27	3.51	4	0	0.3	0	0.1	0.24	0.25	0	1.35	1.85	1.45	1.02	1.68	2.87	3.8	0.2	4.05
Peak_1015	1	58988712	58988724	-	ENSBTAG00000011928	Medium	OK	OK	0	0	0	0.04	0	0.19	0	0.84	0	0.32	0	0	0	0	0.26	0	0	0.21	0	0.14	0	0	0	0.18	0	0	0.7	0	0	0.12	0	0	0	0	0	0.68	0	0	0.19	0	0
Peak_1016	1	59003677	59003714	-	ENSBTAG00000011928	High	OK	OK	0	0	0	0	0	0	0	0	0	0	0	0	0	0	0	0	0	0	0	0	0	0	0	0	0	0	0	0	0	0	0	0	0	0	0	0	0	0	0	0	0
Peak_1017	1	59014759	59014771	-			OK	OK	0	0	0.14	0.56	0	0.38	1.28	0.98	0.32	0.32	0	0	0	0	0	0.54	0.26	0	0	0	0	0	0	0.45	0.2	0	0	1.56	0	0	0	0	0.27	0	0	0	0	0	0	0	0
Peak_1018	1	59083570	59083592	-			OK	OK	0	0	0.28	0.12	1.96	0	0	0.56	0	0	0.17	0	0	0.23	0	0	0	0	0	0	0	0	0	0.54	0.1	0	0	0	0	0	0	0	0	0	1.16	0	0	0	0	0	0
Peak_1019	1	59084743	59084756	-			OK	OK	0	0	0	0	0	0	0	0	0.32	0	0	0	0	0	0	0	0	0	0	0	0	0	0	0	0	0	0	0	0	0	0	0	0	0	0	0	0	0	0	0	0
Peak_1020	1	59086899	59086914	-			OK	OK	0	0.33	0	0.08	0	1.14	0.32	0.14	0.32	0	0	0	0	0.23	0	0	0	0	0	0	0	0.36	0	0.18	0	0	0.1	0	0	0	0	1.11	0	0	0.29	0.17	0	0	0.57	0	0
Peak_1021	1	59087435	59087455	-			OK	OK	0	0	0.14	0	0	0	0	0	0	0	0	0	0	0	0	0	0	0	0	0	0	0	0	0	0	0	0	0	0	0.24	0	0.74	0	0	0	0	0	0	0	0	0
Peak_1022	1	59088516	59088522	-			OK	OK	0	0	0.14	0	0	0	0	0	0	0	0	0	0	0	0	0	0	0	0	0	0	0	0	0	0	0	0	0	0	0	0	0	0	0	0	0	0	0	0	0	0
Peak_1023	1	59088653	59088663	+			OK	OK	0	0	0	0	0	0	0	0	0	0	0	0	0	0	0	0	0	0	0	0	0	0	0	0	0	0	0	0	0	0	0	0	0	0	0	0	0	0	0	0	0
Peak_1024	1	59093403	59093426	-	ENSBTAG00000011928	Medium	OK	OK	0	0.11	0	0.04	0	0	0	0.14	0	0	0	0	0	0	0	0	0	0	0	0	0	0	0	0.09	0.2	0	0.1	0	0	0	0	0	0	0	0	0	0	0	0	0	0
Peak_1025	1	59095502	59095521	-			OK	OK	0	0	0	0.12	1.12	0.38	0	0	0	0	0	0	0	0.23	0	0	0	0	0	0.14	0	0.36	0	0.54	0.5	0	0.1	0	0	0	0	0	0	0	0	0	0	0	0.19	0.2	0
Peak_1026	1	59100510	59100588	-	ENSBTAG00000011928	High	OK	OK	0	0	0	0	0	0	0	0.14	0	0.16	0	0	0	1.61	1.82	2.16	1.43	0	0	0	0	6.12	4.86	7.29	2.7	0	0	0	0	0	0	0	0.54	1.85	1.45	0.17	0	0	0	2.4	1.35
Peak_1027	1	59102482	59102591	-	ENSBTAG00000011928	High	OK	OK	0	0	0	0.08	0	0.57	0.16	0.84	0.32	0.48	0	0	0	2.76	1.3	1.08	1.43	0.42	0	0	0.22	11.16	2.43	7.11	4.7	0	0.4	0	0	0	0.5	0	0.54	0	1.74	0	0	0	0	2.2	1.89
Peak_1028	1	59103675	59103699	-			OK	OK	0	0	0.7	0	0	0	0	0	0	0	0	0	0	0	0	0	0	0	0	0	0	0	0	0	0	0	0.1	0	0	0	0	0	0	0	0	0	0	0	0	0	0
Peak_1029	1	59105748	59105768	+			OK	OK	0	0	0	0	0	0	0	0	0	0	0	0	0	0	0	0	0	0	0	0	0	0	0	0	0.2	0	0	0	0	0	0	0	0	0	0	0	0	0	0	0	0
Peak_1030	1	59106491	59106557	+			OK	OK	0	0	0	0.52	0	0.57	0	0	0	0	1.02	0	0	1.15	0	5.94	1.17	0	0	0	0	1.44	11.07	12.6	0.6	0	0	0	0	0	0	0	0.54	0	0	0	0	0	0	0.2	0
Peak_1031	1	59106755	59106842	-			OK	OK	0	0.22	0	0.88	0.28	0.19	0	0.7	0	0.32	1.19	0	0.49	0.46	0	0.54	0.39	0	2	0	0	2.16	0.81	2.79	0.8	0	0.1	2.08	0	0	0.5	0	0.27	0	0.87	0.34	0	0	2.28	0.4	2.16
Peak_1032	1	59107245	59107437	-	ENSBTAG00000011928	High	OK	OK	0.46	0.88	0	1.32	0	2.09	0.16	6.02	4.8	9.28	5.95	3.4	0.98	3.68	3.12	3.24	1.17	2.31	0.25	0.98	1.76	36	19.98	38.43	26.2	0	1.1	0	0	0.84	0.25	0	3.24	10.73	5.22	0.34	0	0	0.38	1.8	2.43
Peak_1033	1	59117216	59117229	-			OK	OK	0.23	0.44	0.28	0.04	0	0	0	0	0	0.32	0	0	0	0.23	0.26	0	0	0	0	0	0	0	0	0.09	0.5	0	0	0	0	0	0	0	0.27	0	0	0	0	0	0.38	0	0
Peak_1034	1	59118843	59118864	-			OK	OK	0	0.22	0	0.12	0	0	0	0.28	0	0.8	0.34	0	0	0	0	0	0	0	0	0	0	0	1.08	0	0	1.8	0	0	0	0	0	0	0	3.33	0	0	0	0	0.38	0	0.27
Peak_1035	1	59125156	59125158	-			OK	OK	0	0	0	0.12	0	0	0.16	0	0	0.48	0.17	0	0	0	0	0	0	0	0	0	0	0	0	0	0.2	0.45	0	0	0	0	0	0	0	0	0	0	0	0	0.19	0	0
Peak_1036	1	59127491	59127684	-	ENSBTAG00000011928	High	OK	OK	1.84	0.22	0.56	0.36	0.56	0.76	0.16	0.42	0.64	1.6	0.85	1.36	0.49	0.23	0	0	0.13	1.47	0.5	0.42	0	0.72	0	0.63	0.5	0.9	13	5.98	0.6	0.36	3.75	0	0	0.37	0.29	1.7	0	1.23	0.95	0.6	0.27
Peak_1037	1	59130879	59130914	-			OK	OK	0	0	0.42	0	0	0	0	0	0.32	0	0	0	0	0	0	0	0	0	0	0	0	0	0	0	0	0	0	0	0.2	0	0	0	0	0	0	0	0	0	0.38	0	0
Peak_1038	1	59132018	59132027	+			OK	OK	0	0	0	0	0	0	0	0	0	0	0	0	0	0	0	0	0	0	0	0	0	0	0	0	0	0.45	0.1	0.52	0	0	0	0	0	0	0	0	0	0	0	0	0
Peak_1039	1	59133022	59133027	-			OK	OK	0	0	0	0.04	0	0	0.16	0	0	0.32	0	0	0	0	0	0	0	0	0	0	0	0.36	0	0	0.1	0	0	0	0	0	0	0	0	0	0	0	0	0	0	0	0
Peak_1040	1	59144465	59144471	-			OK	OK	0.23	0	0	0.24	0	0	0	0	0	0.32	0.51	0	0	0	0	0	0	0	0	0	0	0	0	0	0	0	0.1	0	0	0	0	0	0	0	0.29	0.17	0	0	0.19	0	0
Peak_1041	1	59145890	59145927	-			OK	OK	0.46	0.33	0.28	0.16	0	0	0	0.7	0.64	0.8	0	0	0	0	0.26	0	0	0	0	0	0	0	0.27	0.18	0.3	0	0.3	1.04	0	0	0.5	0	0	0.37	0	0.51	0	0	1.71	0.6	0
Peak_1042	1	59149963	59149977	-			OK	OK	0	0	0	0.48	0	0.76	0	0.42	0.64	0.8	1.02	0	0.49	0.69	0	0	0	0	0	0	0	1.08	0	0.09	0.3	0	0	1.3	0	0	0	0	0	2.22	1.16	0	0	0.82	0.19	0.6	0
Peak_1043	1	59162439	59162453	-			OK	OK	0	0	0	0.04	0	0	0	0	0	0	0	0	0	0.46	0	0	0	0	0	0	0	0	0	0.27	0	0	0	0.26	0	0	0	0	0	0	0	0	0	0	0	0	0
Peak_1044	1	59165102	59165192	-	ENSBTAG00000011928	High	OK	OK	0	0	0	0	0	0	0	0	0	0	0	0	0	0	0	0	0	0	0	0	0	0	0	0	0	0	0	0	0	0	0	0	0	0	0	0	0	0	0	0	0
Peak_1045	1	59188431	59188476	-			OK	OK	0	0	0	0.52	0	0	0.48	0.14	1.28	0.32	0.51	1.36	0.49	0	0	0	0	0.42	0	0	0.22	0	0.27	0.54	0.4	0	0	0	0	0	0	0	0	0.37	0.58	0	0	0	0.38	0	1.08
Peak_1046	1	59192082	59192164	-			OK	OK	0	0	0.7	0.16	0.56	0	0	0	1.6	0	0	0	0	0	0	0.54	0	0	0	0.56	0	0	0	0	0.4	0	0.4	0	0	0.6	0.25	0	0	0	0	0.34	0	0	0.19	0.2	0
Peak_1047	1	59201472	59201493	-			OK	OK	0	0	0	0	0	0	0	0	0	0	0	0	0	0	0	0	0	0	0	0	0	0.36	0	0	0	0	0	0	0	0	0	0	0	0	0	0.17	0	0	0	0	0
Peak_1048	1	59214393	59214462	-			OK	OK	0	0.88	0.42	0.28	0.84	1.14	1.44	1.26	2.24	0.16	1.02	0	0	0	0.52	0	0.65	0	0	0.28	0	0	0	0.63	0.8	0.9	0	0.52	0.2	0.24	0	0.37	1.08	1.11	0.58	0.68	0	0	0.57	0	0
Peak_1049	1	59216687	59216702	-			OK	OK	0.23	0.11	0.14	0.04	0	0	0.16	0.14	0	0.16	0	0	0	0.69	0	0	0	0.21	0	0	0.22	0	0	0.09	0.4	0	0	0.78	0	0	0	0	0	0	0.29	0.17	0	0	0.57	1.2	0
Peak_1050	1	59218310	59218361	-			OK	OK	0	0.11	0	0.64	5.6	0.57	0.48	0.14	0.32	0.48	2.72	0.68	0	0	0	0	0	0.84	0	0.14	0	0	0	1.26	0.8	0	0	0	0	0	0	0	0.54	0	0	0.85	0	0	0	0.4	1.35
Peak_1051	1	59232597	59232636	-	ENSBTAG00000011928	High	OK	OK	0	0	0	0	0	0	0	0	0	0.32	0	0	0	0.23	0	0	0	0	0	0.7	0	0	0	0	0	0.45	2.7	2.86	0.3	0.12	1.25	0.37	0	0	0	0.51	0	0	0	0	0
Peak_1052	1	59235626	59235638	-			OK	OK	0	0.11	0	0.04	0	0	0	0.14	0.32	0	0	0	0	0	0	0	0	0	0	0	0	0	0	0	0	0	0.2	0	0	0	0	0	0	0	0	0.34	0	0	0.19	0	0
Peak_1053	1	59235883	59235903	-			OK	OK	0	0.11	0	0.08	0	0	0.16	0.14	0	0	0	0	0	0	0	0	0	0	0	0	0	0	0	0	0	0.45	0	0	0.1	0	0	0	0	0	0	0	0.42	0	0	0	0
Peak_1054	1	59236121	59236139	-			OK	OK	0	0	0.14	0	0	0	0	0	0	0	0	0	0	0	0	0	0	0	0	0	0	0.36	0	0	0	0	0	0	0	0	0	0	0	0	0	0	0	0	0	0	0
Peak_1055	1	59238436	59238460	+			OK	OK	0	0	0	0	0	0	0	0	0	0	0	0	0	0	0	0	0	0	0	0	0	0	0	0	0	0	0.5	0.26	0	0	0	0	0	0	0	0	0	0	0	0	0
Peak_1056	1	59238814	59238824	-			OK	OK	0	0	0	0.12	0	0	0	0	0	0	0	0	0	0	0.26	0	0	0	0	0	0.44	0.72	0	0	0	0	0	0	0	0	0	0	0	0	0	0.34	0	0	0	0.4	0
Peak_1057	1	59240899	59240924	-			OK	OK	0	0.11	0.14	0.28	0	0	0	0.7	0	0.48	0.51	0	0	0.23	0	0	0	0	1	0	0.44	0	0	0.09	0.7	0	0.1	0	0	0	0	0	0.27	0	0.58	0	0	0	0	0	0.81
Peak_1058	1	59242574	59242588	-			OK	OK	0	0	0	0	0	0	0.48	0	0	0	0	0	0	0	0	0	0	0	0.5	0	0	1.8	0	0.36	0.1	0	0	0	0	0	0	0	0	0	0	0.17	0	0.41	0.19	0	0
Peak_1059	1	59251844	59251857	-			OK	OK	0	0	0	0	0	0	0	0	0.64	0	0	0	0	0	0	0	0	0	0	0	0	0	0	0	0.2	0	0	0	0	0	0	0	0	0.37	0	0.17	0	0	0	0	0
Peak_1060	1	59254241	59254305	-			OK	OK	0	0.33	0.56	0.16	0	0	0	0	0.32	0	0	0	0	0	0	0	0	0	0	0.14	0	1.8	0	0	0.1	0	0.1	0	0	0.24	0	0	0	0	0	0	0	0	0.19	0	0
Peak_1061	1	59262698	59262709	-			OK	OK	0.23	0	0	0.08	0	0.57	0	0	0	0	0.17	0	0	0	0	0	0	0	0	0	0	0	0	0	0	0	0	0	0	0	0	0	0	1.11	0	0	0	0	0	0	0
Peak_1062	1	59266830	59266842	-			OK	OK	0	0.11	0	0.08	0.28	0	0	0	0.96	0	0	0	0	0	0	0	0.39	0	0	0.14	0	0	0	0	0.2	0	0	0	0	0	0	0	0	0.37	0	0	0	0.41	0.19	0	0
Peak_1063	1	59269276	59269291	-			OK	OK	0	0	0	0	0	0	0	0.14	0	0	0	0	0	0	0	0	0	0	0	0.28	0	0	0	0.45	0	0	0.3	0	0	0	0	0	1.08	0	0	0	0	0	0	1	0
Peak_1064	1	59272754	59272768	-			OK	OK	0	0	0.14	0	0	0	0	0.28	0	0.48	1.87	0	0.49	0	0	0	0	0	0.25	0	0	0	0	0	0	0	0.1	0	0	0	0	0	0.27	0	0	0	0	0	0	0.2	0
Peak_1065	1	59273446	59273460	-			OK	OK	0.23	0	0	0.08	0	0	0	0	1.28	0	0	0	0.49	0	0	0	0	0	0	0	0	0	0	0	0	0	0.3	0	0	0.12	0	0	0	0	0	0.34	0	0.82	0	0.2	0
Peak_1066	1	59279458	59279481	-	ENSBTAG00000011928	High	OK	OK	0	0	0.28	0.72	0	2.47	0.96	0.14	0	0	0.17	0.68	0	0	0.78	0	0	0	0	0	0	0	0	0.09	0.3	0	0	0	0	0	0.25	0	0	0	0	0	0	0	0	0	0
Peak_1067	1	59279653	59279986	-	ENSBTAG00000011928	High	OK	OK	1.61	1.54	3.08	12.76	7	18.81	9.28	10.36	1.92	4.32	11.05	10.88	6.37	10.58	10.14	7.02	2.34	2.52	3.5	2.24	1.98	8.28	1.08	6.39	3.5	0.9	2.7	3.38	1.4	0.36	0.75	0.74	12.15	3.7	8.12	12.24	12.18	3.28	7.98	5.4	2.97
Peak_1067	1	59279653	59279986	-	ENSBTAG00000007784	Medium	OK	OK	1.61	1.54	3.08	12.76	7	18.81	9.28	10.36	1.92	4.32	11.05	10.88	6.37	10.58	10.14	7.02	2.34	2.52	3.5	2.24	1.98	8.28	1.08	6.39	3.5	0.9	2.7	3.38	1.4	0.36	0.75	0.74	12.15	3.7	8.12	12.24	12.18	3.28	7.98	5.4	2.97
Peak_1068	1	59280424	59280533	-	ENSBTAG00000011928	High	OK	OK	0.23	0.33	1.4	10.76	2.8	13.87	9.28	12.32	8	7.36	8.5	10.88	9.31	7.82	4.16	5.94	4.16	3.15	5	1.12	4.84	7.56	9.72	9.09	6.8	3.6	4.1	1.04	0.1	0.84	0	0.37	14.04	15.17	27.84	26.69	37.8	32.8	35.72	3.2	4.59
Peak_1069	1	59282616	59282641	-			OK	OK	0.23	0.11	0	0	0.28	0	0	0.98	0.64	2.4	0.34	0	0	0	0.26	0	0	0.21	0	0	1.1	0	1.08	0	0.1	0	0	0.52	0.1	0	0	0	0	0.37	0	0.17	0	0.41	0.38	0	0
Peak_1070	1	59297001	59297011	-			OK	OK	0.23	0	0	0	0	0.76	0	0	0.32	0.16	0	0	0	0	0	0	0	0	0	0.14	0	0	0	0.09	0.4	0	0	0	0	0	0	0.37	0	1.48	0	0	0	0	0.19	0	0
Peak_1071	1	59299773	59299780	-			OK	OK	0	0	0	0	0	0	0	0	3.84	0	0	0	0	0	0	0	0	0	0	0	0	0	0	0	0	0	0	0	0	0	0	0	0	0	0	0	0	0	0	0	0
Peak_1072	1	59300449	59300463	-			OK	OK	0	0	0	0	0	0	0	0.28	0	0	0	0	0	0	1.04	0	0	0	0	0	0	0	0	0	0	0	0	0	0.2	0	0	0	0	0	0	0	0	0	0	0	0
Peak_1073	1	59303681	59303695	-			OK	OK	0	0.33	0.14	0	0	0	0	0	0	0	0	0	0	0	0	0	0	0	0	0	0	0	0	0	0	0	0	0	0	0	0	0	0	0	0	0	0	0	0	0	0
Peak_1074	1	59316692	59316704	-			OK	OK	0	0	0	0.04	0	0.38	0.16	0	0	0	0	0	0.49	0	0	0	0	0	0	0	0	0	0	0	0	0	0.2	0.26	0	0	0	0	0	0	0	0	0	0	0	0.2	0
Peak_1075	1	59317951	59317959	-			OK	OK	0	0	0	0.08	0	0.19	0	0	0	0	0	0	0	0	0	0	0	0	0	0	0	0.36	0	0	0.1	0	0	0	0	0	0	0	0	0	0	0	0	0.41	0	0	0
Peak_1076	1	59321006	59321009	-			OK	OK	0	0	0	0	0	0	0	0	0	0.32	1.02	0	0	0	0	0	0	0	0	0	0	0	0	0	0.4	0	0	0	0	0	0	0	0	0	0	0	0	0	0	0.2	0
Peak_1077	1	59331225	59331240	-			OK	OK	0.23	0.11	0.14	0	0	0	0	0.84	0	0	0	2.04	0	0	0	0	0	0	0	0	0.22	0.72	0	0	0.4	0	0	0	0	0	0	0	0	0	0	0	0	0.82	0	0	0
Peak_1078	1	59334307	59334321	-	ENSBTAG00000011928	Medium	OK	OK	0	0	0.28	0.08	0	0	0.32	0	0	0	0	0	0	0	0	0	0	0	0	0	0	0	0	0	0	0	0	0	0.1	0	0	0	0	1.11	0.87	0.51	0	0.41	0.57	0	0
Peak_1079	1	59335341	59335351	-			OK	OK	0	0	1.26	0	0	0	0	0	0	0	0	0	0	0	0	0	0	0	0	0	0	0	0	0	0.1	0	0	0	0	0	0	0	0	0	0	0	0	0	0	0	0
Peak_1080	1	59350389	59350398	-			OK	OK	0	0	0.14	0	0	0	0	0	0	0	0	0	0	0	0	0	0	0	0	0	0	0	0	0	0	0	0	0	0	0	0	0	0	0	0	0.34	0	0	0	0	0
Peak_1081	1	59351802	59351815	-			OK	OK	0.46	0	0.56	0	0	0	0.48	0	0	0	0	0	0	0	0	0	0	0	0	0.28	0	0.72	0	0.27	0.3	0	0	0	0	0	0	0	0	0	0	0.17	0	0	0.19	0	0
Peak_1082	1	59389062	59389067	+			OK	OK	0	0	0	0	0	0	0	0	0	0	0	0	0	0	0	0	0	0	0	0	0	0	0	0	0	0	0	0	0	0	0	0	0	0	0	0	0	0	0	0	0
Peak_1083	1	59389314	59389338	+			OK	OK	0	0	0	0	0	0	0	0	0	0	0	0	0	0	0	0	0	0	0	0	0	0	0	0	0	0	0	0	0.1	0	0	0	0	0	0	0	0	0	0	0	0
Peak_1084	1	59398420	59398434	-			OK	OK	0	0.11	0	0	0	0	0	0	0	0	0.17	0	0	0	0	0	0	0	0	0	0	0	0	0.09	0.1	0	0	0.52	0	0.24	0	0	0	0	0	0	0	0	0	0	0
Peak_1085	1	59423609	59423627	-			OK	OK	0	0.11	0	0	0	0	0	0	0	0.64	0	0	0	0.46	0	0	0	0	0	0	0.22	0	0	0	0.3	0	0	0	0	0.12	0	0	0	0	0	0	0	0	0	0	0
Peak_1086	1	59425614	59425946	-	ENSBTAG00000011928	High	OK	OK	5.52	13.09	5.04	5.52	0.84	11.59	7.52	4.34	0.96	5.28	2.89	8.16	3.43	11.73	9.62	18.36	7.67	2.31	1	0.98	1.76	19.8	25.92	24.57	23.2	0.9	2	1.04	3.3	10.92	3.75	10.36	12.15	7.03	3.77	1.53	0	0.82	0.95	9	12.69
Peak_1087	1	59426300	59426301	-			OK	OK	0	0	0	0	0	0	0.16	0.28	1.28	0	0	0	0	0	0	0	0	0	0	0.14	0	0.36	0	0	0	0	0.1	0	0	0	0	0	0	0	0	0	0	0	0	0	0
Peak_1088	1	59427392	59427403	-			OK	OK	0	0	0	0	0	0	0	0	0	0	0	0	0	0	0	0	0	0	0	0	0	0	0	0	0.2	0	0	0	0	0	0	0	0	0	0	0	0	0	0.57	0	0
Peak_1089	1	59437322	59437339	-			OK	OK	0	0	0	0.04	0	0	0.32	0.14	0.64	0	0	0	0	0	0	0	0	0.42	0	0.14	0	0.36	0	0.45	0.8	0	0.1	0.52	0	0.12	0	0	0	0	0.29	0.51	0	1.64	0	0	0
Peak_1090	1	59442846	59442856	-			OK	OK	0	0	0	0.2	0	0	0	0	0	0	0	0	0	0	0	0	0	0	0	0	0	0	0	0	0.1	0	0	0.26	0	0	0	0	0	0	0	0	0	0.41	0.38	0	0
Peak_1091	1	59453941	59454012	-			OK	OK	0	0	0	0.24	0	0.38	0.16	0.7	0.96	1.44	0.51	0	0.49	0	0.26	0	0	0	0	0	0.22	0.72	0	0	0.3	0	0	0	0.1	0	0	0	0.54	0	0	0	0	0	0	0	1.08
Peak_1092	1	59471427	59471514	-	ENSBTAG00000011928	High	OK	OK	0.23	0	0	0	0	0.38	0	0	1.6	0.16	0.51	0	0	0	0	0.54	0	0	0	0	0	0	0	0	0.4	0	0	0.52	0	0.24	0	0	0	0	0	0	0	0	0	0	0
Peak_1093	1	59474031	59474041	-			OK	OK	0	0	0.14	0	2.24	0	0	0.84	0	0	0	0	0	0	0	0	0	0	0	0	0	0	0	0	0	0	0.1	0	0	0	0	0	0	0	0	0	0	0	0	0	0
Peak_1094	1	59514185	59514202	-	ENSBTAG00000011928	Medium	OK	OK	0	0	0	0	0	0	0	0	0	0	0	0	0	0	0	0	0	0	0	0	0	0	0	0	0	0	0	0	0	0	0	0	0	0	0	0	0	0	0.19	0	0
Peak_1095	1	59515092	59515107	-			OK	OK	0	0	0	0	0	0	0	0	0	0.16	1.02	0	0	0	1.04	0	0	0	0.25	0	0	0	0	0.18	0	0	0	0.26	0	0	0	0	0	0	0.29	0.85	0	0	0	0	0
Peak_1096	1	59523021	59523032	-			OK	OK	0	0	0	0.04	0	0.19	0	0	0	1.28	0	0	0	0	0	0	0	0.21	0	0	0.44	1.44	0	0.27	0.4	0.45	0	0	0	0.12	0	0	0	0	0.58	0.85	0	0	0	0.6	0.27
Peak_1097	1	59537660	59537665	-			OK	OK	0	0	0.28	0	0	0	0	0.28	0	0	0	0	0	0	0	0	0	0	0	0	0	0	0	0	0	0	0	0	0	0	0	0	0	0	0	0	0	0	0	0	0
Peak_1098	1	59542636	59542649	-			OK	OK	0	0	0	0.04	0	0	0	0	0	0.96	0.17	0	0	0	0	0	0	0	0.25	0	0	0	0	0.18	0	0.45	0	0	0	0	0	0	0	0	0	0	0	0	0	0.2	0.27
Peak_1099	1	59550580	59550648	-	ENSBTAG00000011928	High	OK	OK	0	0	0	0.04	0	0	0	0	0	0	0	0	0	0	0	0	0	0	0	0.14	0	0	0	0	0	0	0	0	0	0	0	0	0	0	0	0	0	0	0	0	0
Peak_1100	1	59568709	59568727	-			OK	OK	0	0	0.14	0	0.28	0	0.32	0	0	0	0	0	0	0	0	0	0	0	0	0.14	0	0	0	0.09	0.1	0	0.1	0	0	0	0	0	0	0	0	0.51	0	0	0	0	0
Peak_1101	1	59569183	59569190	-			OK	OK	0	0.44	0	0	0	0	0	0	0	0	0	0	0	0	0	0	0	0	0	0.14	0	0	0	0	0	0	0	0	0	0	0	0	0	0	0	0	0	0	0	0	0
Peak_1102	1	59582912	59582922	-			OK	OK	0	0	0	0	0	0	0	0	0.32	0	0	0	0	0	0	0	0	0	0	0	0	0	0	0.18	0.1	0	0	0	0	0	0.25	0	0	0	0	0	0	0	0	0.2	0
Peak_1103	1	59583521	59583534	-			OK	OK	0	0	0	0	0	0	0	0	0	0	0	0	0	0	0	0	0	0	0	0	0	0.36	0	0.09	0.2	0	0	0	0	0	0	0	0	0	0	0	0	0	0	0	1.89
Peak_1104	1	59588168	59588182	+			OK	OK	0	0	0	0	0	0	0	0	0	0	0	0	0	0	0	0	0	0	0	0	0	0	0	0	0	0	0	0	0	0	0	0	0	0	0	0	0	0	0	0	0
Peak_1105	1	59588854	59588886	-	ENSBTAG00000011928	High	OK	OK	0	0	0	0	0	0	0	0	0	0	0	0	0	0	0	0	0	0	0	0	0	0	0	0	0	0	0	0	0	0	0	0	0	0	0	0	0	0	0	0	0
Peak_1106	1	59672092	59672093	-			OK	OK	0	0	0	0	0	0.19	0.32	0	0	0.48	0	0	0	0	0	0	0	0	0	0	0	0	0.27	0	0.3	0	0	0	0	0	0	0	0.27	0	0	0	0	0	0	0	0
Peak_1107	1	59672879	59672882	-			OK	OK	0.23	0	0	0.12	0	0.57	0.16	0	0	0.16	0	0	0	0	0	0	0	0	0	0	0	0	0	0	0	0	0	0.26	0	0	0.25	0	0	0	0	0	0	0	0	0.4	0
Peak_1108	1	59673498	59673522	-	ENSBTAG00000011928	Low	OK	OK	0	0	0	0	0	0	0	0	0	0	0	2.04	0	0	0	0	0	0	0	0	0	0	0	0.09	0	0	0.2	0	0	0	0	0	0	0	0	0	0	0	0	0	0
Peak_1109	1	59679761	59679774	-			OK	OK	0	0.22	0.14	0	0	0	0	0	0	0	0	0	0	0	0.52	0	0	0	0	0	0	0	0	0	0.3	0	0	0	0	0.12	0	0	0	0	0	0	0	0	0	0	0
Peak_1110	1	59690622	59690637	-			OK	OK	0	0	0.14	0	0	0	0	0	0.32	0.48	0.17	0	0	0	0	0	0.13	0	0	0.14	0	0	0	0	0.1	0	0	0	0	0	0	0	0	0	0	0	0	0	0	0	0
Peak_1111	1	59728506	59728552	-			OK	OK	0	0	0.28	0.08	0	0	0	0	0	0	0	0	0	0	0	0	0	0	0	0	0	0	0	0	0	0	0.5	0	0	0.12	0	0	0	0	0	0	0	0	0	0	0
Peak_1112	1	59729495	59729510	-			OK	OK	0.23	0.44	0	0	0	0	0	0	0.32	0	0	0	0	0	0	0	0.13	0	0	0	0	0	0	0	0	0	0.3	0.26	0	0	0	0	0	0	0	0	0	0	0	0	0
Peak_1113	1	59731476	59731491	-			OK	OK	1.15	0.11	0.28	0	0	0.38	0.32	0.42	0.64	0.32	0.17	0	0	0	1.04	0	0	1.05	0	0.42	0.22	0	0	0.36	0	1.8	0.6	0	0	0	0	0	0	0	0.29	0.51	0	0	0.57	0.6	0
Peak_1114	1	59762510	59762534	-			OK	OK	0	0	0.28	0	0	0	0	0	1.28	0	0	0	0	0	0	0	0	0	0	0.14	0	0	0	0	0.3	0	0.7	0	0	0.24	0	0	0	0	0	0	0	0	0.19	0.2	0
Peak_1115	1	59762780	59762790	-			OK	OK	0	0	0	0.12	0	0.38	0	0.42	0	0	0	0	0	0	0	0	0	0	0	0.14	0	0	0	0	0	0	0.3	0	0.1	0.12	0	0	0	0	0	0	0	0	0	0	0
Peak_1116	1	59765526	59765547	-			OK	OK	0	0	0.14	0	0	0	0.16	0.28	0	0.16	0	0.68	0	0	0	0	0	0.63	0.5	0	0	0	0	0.18	0	0	0.1	0	0	0.48	0.25	0	0	0	0	0	0	0	0	0	0
Peak_1117	1	59768061	59768084	-			OK	OK	0	0	0.14	0.28	0	0	0.16	0.42	2.56	0	0	0	0	0	0	0	0	0.42	0	0	0	0	0	0.45	0	0.9	0.1	0.26	0	0	0	0	0	1.48	0	0.34	0	0	0.38	0.2	0
Peak_1118	1	59770479	59770548	-	ENSBTAG00000011928	High	OK	OK	0.23	0.11	0.42	1.84	0.28	4.56	2.4	1.96	2.56	3.2	2.55	1.36	1.47	2.76	3.38	4.86	2.08	0.84	1.25	0.7	1.76	7.92	3.78	8.64	6.6	0	1.3	0.78	0.2	0.72	0	0	1.62	0	0	0.68	1.68	1.23	1.71	1.2	2.7
Peak_1119	1	59771428	59771582	-	ENSBTAG00000011928	High	OK	OK	5.75	12.76	16.52	35.64	7.56	66.5	50.08	37.94	19.2	42.4	25.67	81.6	38.71	22.31	19.5	20.52	7.67	19.95	7.75	5.04	20.02	79.92	59.94	93.42	77	9	20	18.46	6.5	13.32	6.25	5.18	27.81	48.47	44.08	29.24	26.88	27.88	31.92	16.4	28.08
Peak_1120	1	59771729	59771923	-	ENSBTAG00000011928	Medium	OK	OK	0.23	0.44	0.28	0.4	0	0.95	0.16	0	0.64	0	0	1.36	0.98	1.15	1.56	0	0.13	0	0	0.7	0.88	0.72	0	2.16	1	0.45	0.6	0.26	0.1	0.6	0	0.74	0	0	1.16	0.17	0	0	0.76	0	0.27
Peak_1121	1	59780757	59780771	+			OK	OK	0	0	0	0	0	0	0	0	0	0	0	0	0	0	0	0	0	0	0	0	0	0	0	0	0	0	0	0	0	0	0	0	0	0	0	0.17	0	0	0.19	0	0
Peak_1122	1	59781037	59781090	-	ENSBTAG00000011928	High	OK	OK	0	0	0	0	0	0	0	0	0	0.16	0	0	0	0	0	0	0	0	0	0	0	0	0	0	0	0	0.1	0	0	0	0	0	0	0	0	0	0	0	0	0	0
Peak_1123	1	59795741	59795749	-			OK	OK	2.07	0	1.26	0	0	0	0	0	0	0	0	0	0	0	0	0	0	0	0	0	0	0	0	0	0	0	0.4	0	0	0	0.25	0	0	0	0	0	0	0	0	0	0
Peak_1124	1	59803101	59803113	-			OK	OK	0.46	0	0	0	0	0	0	0	0.64	0	0	0	0	0	0	0	0	0	0	0	0	0	0	0	0	0	0	0	0	0	0	0	0	0	0	0	0	0	0	0	0
Peak_1125	1	59803668	59803682	-			OK	OK	0	0	0.42	0	0	0	0	0.14	1.28	0	0	0	0	0	0	0	0.39	0	0	0	0	0	0	0	0	0	0.3	0	0	0	0	0	0	0	0	0	0	0	0	0	0
Peak_1126	1	59809376	59809387	-			OK	OK	0	0	0.14	0	0	0	0	0.42	0	0.16	0	0	0	0	0	0	0	0.21	0	0.14	0	0	0	0	0	0	0	0	0	0	0	0	0	0	0	0	0	0	0.57	0	0
Peak_1127	1	59814707	59814925	-	ENSBTAG00000011928	High	OK	OK	25.53	43.34	53.76	63.44	21	83.22	99.52	117.88	66.24	154.4	78.37	193.12	132.79	42.09	26	27	18.85	40.32	31	23.38	50.82	79.92	71.01	101.61	83.5	52.2	61	70.2	12	28.08	11.5	13.69	49.68	67.71	82.94	40.46	33.18	46.74	47.31	42.2	65.34
Peak_1128	1	59815243	59815296	+			OK	OK	0.46	0.22	1.12	0.28	0	0.38	0.16	1.12	0.32	1.76	0.51	0.68	0.49	2.07	1.3	2.7	1.17	0.21	0.25	0.42	0.22	6.84	2.7	4.32	4	1.8	1	0.26	0.1	0.12	0	0.37	0.27	0	0.87	0	0	2.05	1.14	1.4	1.62
Peak_1129	1	59849761	59849798	+			OK	OK	0	0	0	0	0	0	0	0	0	0	0	0	0	0	0	0	0	0	0	0	0	0	0	0	0	0	0	0	0	0	0	0	0	0	0	0	0	0	0	0	0
Peak_1130	1	60041496	60041552	-			OK	OK	0	0	0	0	0	0	0	0	0	0	0	0	0	0	0	0	0	0	0	0	0	0	0	0	0	0	0	0	0	0	0	0	0	0	0	0	0	0	0	0	0
Peak_1131	1	60060086	60060120	-			OK	OK	0	0	0	0	0	0	0	0	0	0	0	0	0	0	0	0	0	0	0	0	0	0	0	0	0	0	0	0	0	0	0	0	0	0	0	0	0	0	0	0	0
Peak_1132	1	60306483	60306502	+	ENSBTAG00000006451	High	OK	OK	0	0	0	0	0	0	0	0	0	0	0	0	0	1.38	2.34	2.7	2.08	0	0	0	0	0	0	0.09	0.1	0	0	0	0	0	0	0	0	0	0	0	0	0	0	0	0.81
Peak_1133	1	60306676	60306781	+	ENSBTAG00000006451	High	OK	OK	0.69	0.22	0.28	0	0	0	0	0.42	0.32	0.16	0	0	0	173.65	107.9	287.82	148.85	1.05	1.75	1.12	0.44	96.84	129.6	116.28	106.9	0	0.8	0	0.5	0.12	0	0	0	0	0	0	0	0	0	61.2	60.21
Peak_1134	1	60463094	60463218	+			OK	OK	0	0	0.28	0.04	0	0.38	0	0	0	0	0	0	0	1.61	14.3	5.94	2.73	0	0	0	0	18.72	17.01	23.13	12.9	0	0.4	0	0	0.24	0	0	1.08	0	0	0	0	0	0.19	1	2.7
Peak_1135	1	60464034	60464071	-			OK	OK	0	0	0	0	0	0.38	0.16	0	0	0	0	0	0	0.46	0.26	0	0.39	0	0	0	0	2.88	3.51	1.53	2.9	0	0	0	0	0	0	0	0	0	0	0	0	0	0.76	0	0
Peak_1136	1	60484687	60484733	-	ENSBTAG00000049383	High	Low_H3K4me3	OK	0	0	0	0	0	0	0	0	0	0	0	0	0	3.68	1.3	6.48	3.38	0	0	0	0	1.08	6.75	4.59	5	0	0	0	0	0	0	0	0	0	0	0	0	0	0.38	1.2	0.81
Peak_1137	1	60643562	60643598	-	ENSBTAG00000049383	High	OK	OK	0	0	0	2.24	0.56	0.38	2.56	0	0	0	0	0	0	0	0	0	0	0	0	0	0.44	0	0	0	0	2.7	0	0	0	0	0	0	0	0	0	0	0	0	0	0	0
Peak_1138	1	60960547	60960564	-			OK	OK	0	0	0	0	0	0.38	0.16	0	0	0	0	0	0	0	0.78	0	0.13	0	0	0	0	1.44	0	1.17	2.3	0	0	0	0	0	0	0	0	0	0	0	0	0	0	0	0
Peak_1139	1	60970058	60970068	-			OK	OK	0	0	0	0	0	0	0	0	0	0	0	0	0	0	1.82	1.08	0.39	0	0	0	0	0	0	0.18	1.1	0	0	0	0	0	0	0	0	0	0	0	0	0	0	0.4	0.54
Peak_1140	1	61011767	61011780	-			OK	OK	0	0	0	0	0	0	0	0	0	0	0	0	0	0	0.78	0	0	0	0	0	0	0	1.35	0	0.7	0	0	0	0	0	0	0	0	0	0	0	0	0	0	0	0.81
Peak_1141	1	61053273	61053287	-			OK	OK	0	0	0	0	0	0	0	0	0	0	0	0	0	0	5.2	0	0	0	0	0	0	0	0	0	0.6	0	0	0	0	0	0	0	0	0	0	0	0	0	0	0	0
Peak_1142	1	61075272	61075283	-			OK	OK	0	0	0	0	0	0	0	0	0	0	0	0	0	0	0	0	0.13	0	0	0	0	1.8	0	0.81	0.6	0	0	0	0	0	0	0	0	0	0	0	0	0	0	0	0
Peak_1143	1	61108762	61108763	-			OK	OK	0	0	0	0	0	0	0	0	0	0	0	0	0	0	1.3	2.16	0.91	0	0	0	0	3.24	0	0.99	1.2	0	0	0.26	0	0	0	0	0	0	0	0	0	0	0	0	0
Peak_1144	1	61171640	61171652	-			OK	OK	0	0	0.14	0	0	0	0	0	0	0	0	0	0	0	0	0	0	0	0	0	0	0	0	0.9	1	0	0	0.78	0	0	0	0	0	0	0	0	0	0	0	0	0
Peak_1145	1	61192197	61192370	-	ENSBTAG00000049383	Low	OK	OK	0.46	0	3.64	0.12	0	0.38	0	0.28	0	0.16	1.36	0	0.98	193.66	95.94	125.82	56.29	0.21	0	0.14	1.32	251.28	118.8	199.89	234.6	0	1.2	2.86	0.1	1.32	0	0	1.62	0	0	0.85	0	1.23	0.95	36.2	28.35
Peak_1145	1	61192197	61192370	-	ENSBTAG00000048452	High	OK	OK	0.46	0	3.64	0.12	0	0.38	0	0.28	0	0.16	1.36	0	0.98	193.66	95.94	125.82	56.29	0.21	0	0.14	1.32	251.28	118.8	199.89	234.6	0	1.2	2.86	0.1	1.32	0	0	1.62	0	0	0.85	0	1.23	0.95	36.2	28.35
Peak_1146	1	61789615	61789634	-			OK	OK	0	0.33	0	0.16	0	0	0.64	0.28	0	0	0.51	0	0.98	0	0.78	0	0.13	0.42	0	0	0	0	1.08	0.27	0	0	0.6	0	0.1	0.24	0	0	0	0	2.32	0.34	0	1.23	0	0	0
Peak_1147	1	62877669	62877779	-	ENSBTAG00000049383	Medium	OK	OK	2.07	0.88	0.56	0.08	0	0	0.32	0	0	0	0.68	1.36	1.47	23.46	16.12	95.58	25.87	0	1	0.14	0	33.12	14.04	22.59	29.3	0	1	0	0.1	0	0	0	0	1.11	0	4.59	1.68	0.41	2.28	16.2	13.5
Peak_1147	1	62877669	62877779	-	ENSBTAG00000048452	High	OK	OK	2.07	0.88	0.56	0.08	0	0	0.32	0	0	0	0.68	1.36	1.47	23.46	16.12	95.58	25.87	0	1	0.14	0	33.12	14.04	22.59	29.3	0	1	0	0.1	0	0	0	0	1.11	0	4.59	1.68	0.41	2.28	16.2	13.5
Peak_1148	1	63344864	63344879	+			OK	OK	0	0	0	0	0	0	0	0	0	0	0	0	0	0	0	0	0	0	0	0	0	0	0.27	0	0	0	0	0.26	0	0	0	0	0	0	0	0	0	0	0	0	0
Peak_1149	1	63833514	63833653	-			OK	OK	0	0	0	0	0	0	0	0.56	0	0	0	0	0	4.6	11.7	4.32	3.9	0	0	0	0	3.96	4.59	1.17	2.4	0	0	0	0	0	0	0	0	0	0	0	0	0	0	4	18.9
Peak_1150	1	63833835	63833864	-			OK	OK	0	0	0	0	0	0	0	0	0	0	0	0	0	0.46	0	0	0	0	0	0	0	0	0	0.99	0	0	0	0	0	0	0	0	0	0	0	0	0	0	0	1.4	0.81
Peak_1151	1	63845529	63845542	-			OK	OK	0	0	0	0	0	0	0	0	0	0	0	0	0	2.76	0	0	0	0	0	0.42	0	0	0	0	0	0	0	0	0	0	0.25	0	0	0	0	0	0	0	0	0	0
Peak_1152	1	63870958	63871019	-	ENSBTAG00000045704	High	OK	Likely_false	0	0	0	0	0	0	0	0.14	0	0	0	0	0	2.3	0.78	1.08	0.52	0	0	0	0	1.08	0.27	1.26	1.3	0	0	0	0	0	0	0	0	0	0	0	0	0	0	2.4	1.89
Peak_1153	1	63892837	63892967	-	ENSBTAG00000045704	High	OK	OK	0	0	0.14	0.04	0	0	0	0	0	0.48	0	0	0	15.18	3.9	3.78	2.73	0	0.75	0	0	11.16	3.24	8.46	2.6	0	0	0	0	0	0	0	0	0	0	0	0	0	0	14	27.27
Peak_1154	1	63893071	63893189	+	ENSBTAG00000054494	High	OK	OK	0	0	0	0	0	0.19	0	0	0	0.16	0	0	0	0	1.56	2.16	1.56	0	0	0.14	0	2.52	2.16	3.42	3.5	0	0.2	0	0	0	0	0	0	0	0	0	0	0	0	0.4	1.08
Peak_1155	1	63957168	63957169	-	ENSBTAG00000045704	Medium	OK	Likely_false	0	0	0	0	0	0	0	0	0	0	0	0	0	0	0	0	0	0	0	0	0	0	0	0	0	0	0	0	0	0	0	0	0	0	0	0	0	0	0	0	0
Peak_1156	1	63957269	63957304	+	ENSBTAG00000014157	High	OK	OK	0	0	0	0	0	0	0	0	0	0	0	0	0	0	0	0	0	0	0	0	0	0	0	0	0	0	0	0	0	0	0	0	0	0	0	0	0	0	0	0	0
Peak_1157	1	63977955	63977968	-			OK	OK	0	0	0	0	0	0	0	0	0	0	0	0	0	0	0	0	0	0	0	0	0	0	0	0	0	0	0	0	0	0	0	0	0	0	0	0	0	0	0	0	0
Peak_1158	1	63981577	63981726	+	ENSBTAG00000009014	High	OK	OK	0	0.11	0.42	0	0	0	0	1.96	1.28	0.16	0	0	0	0.46	0	0	0.13	0	0	0	0	0.72	0.54	1.44	0	0	0	0.26	0	0.12	0	0	0	0	0	0	0	0	0.19	0	0
Peak_1159	1	63985535	63985540	+			OK	OK	0	0	0	0	0	0	0	0	0	0	0	0	0	0	0	0	0	0	0	0	0	0	0	0	0	0	0	0	0	0	0	0	0	0	0	0	0	0	0	0	0
Peak_1160	1	64019692	64019774	-	ENSBTAG00000001390	High	OK	OK	0	0	0	0.12	0	0	0.32	0.28	0.32	0	0.17	0	0	0	0.26	0	0.13	0.21	2.25	1.26	0.44	0	1.08	0.09	0.1	0	9.1	0.26	0.1	0.72	0.5	0.37	0	0.37	0	0	0.84	0	0.19	0	0
Peak_1161	1	64044071	64044096	-			OK	OK	0	0.22	0	0	0	0	0	0	0	0	0	0	0	0	0	0	0	0	0	0	0	0	0	0.18	0.1	0	0.1	2.6	0	0	0	0	0	0	0	0	0	0	0	0	0
Peak_1162	1	64049953	64050079	-	ENSBTAG00000001390	High	OK	OK	2.3	0.55	0.7	3.12	0.56	4.94	2.72	3.36	0.96	4.32	2.21	4.08	5.88	5.98	2.86	1.62	1.95	21	15	7	16.72	8.28	7.02	11.16	10.4	15.3	20.5	44.72	1.5	0.48	0.5	1.85	2.43	4.81	1.74	1.19	5.46	0.41	1.52	1.6	1.89
Peak_1163	1	64050164	64050192	+			OK	OK	0	0	0	0	0	0.38	0	0	0	0	0	0	0	0.46	0	0	0	0.21	0	0	0	0.36	0.81	0.45	1.1	0	0.2	0	0	0	0	0	0.54	0	0	0	0	0	0	0	0
Peak_1164	1	64072997	64073017	+			OK	OK	0	0	0	0.04	0	0.19	0.16	0	0.32	0.16	0	1.36	1.96	0	0	0	0.13	0	0	0	0	0	0	0	0	0	0	0	0	0.12	0	0	0	0	0	0.68	1.26	0.82	0.57	0.6	0
Peak_1165	1	64082013	64082034	+			OK	OK	0	0	0	0	0	0	0	0	0	0	0	0	0	0	0	0	0	0	0	0	0	1.08	1.08	1.44	0.3	0	0	0	0	0	0	0	0	0	0	0	0	0	0	0.4	0
Peak_1166	1	64082252	64082253	+			OK	OK	0	0	0	0	0	0	0	0.14	0	0	0	0	0	0	0	0	0	0	0	0	0	0.72	0	0.18	0.4	0	0	0	0	0	0	0	0	0	0	0	0	0.41	0	0	0
Peak_1167	1	64082512	64082526	+			OK	OK	0	0	0	0.04	0.56	0.19	0	0	0	0	0.17	0	0.98	0.46	0	0.54	0	0	0	0	0	1.08	0	0.09	0.2	0	0	0	0.1	0	0	0	0	0	0.29	0	0	0.41	0	0	0
Peak_1168	1	64082887	64082902	+	ENSBTAG00000000210	High	OK	OK	0	0.11	0	0.24	0.56	0	0.16	0	0.32	0.16	0.34	0	0.49	0.92	0	0	0	0.21	1.5	0	0	0	0.27	0.9	0.1	0	0.2	0	0.5	0	0	0	0	0	0	0.34	0	0	0.19	0	0
Peak_1169	1	64083496	64083502	+			OK	OK	0	0	0	0.04	1.12	0	0	0	0	0.16	0	0	1.96	0.69	0	0	0	0	0	0.14	0	0	0	0.18	0	0	0	0	0	0	0	0	0	0	0	0	0	0	0	0	0
Peak_1170	1	64084944	64084956	+			OK	OK	0	0	0	0.24	0	0	0	0	0	0.64	3.91	2.04	0	0.92	0	0	0	0	0	0.42	0	0	0	0.63	0.1	0	0	0.52	0	0	0	0	0	6.66	2.03	1.02	0	0	0.95	0.6	0
Peak_1171	1	64091891	64091945	+			OK	OK	0.23	0	0.14	1.2	1.4	0	1.6	1.26	0.32	0.64	1.36	0	0.98	0.46	0	0	0.13	0	1	0.84	0.66	0.36	0	2.25	0.2	1.35	0.2	0	0.2	0	0.25	0	0.54	0	0	1.53	0.42	0.82	0.76	2.8	1.89
Peak_1172	1	64092311	64092336	+			OK	OK	0	0.11	0	0.04	0	0	0	0	0	0	0.34	2.04	0	0.23	0	0.54	0	0	0	0	0	0	0	0.36	0	0	0	0	0	0	0	0	0	0	0	0.68	0	0	0	0	0
Peak_1173	1	64102329	64102336	+			OK	OK	0	0	0	0.28	0	0.19	0	0	0	0.16	1.19	0	0	0	0	0	0.13	0	0.25	0	0	0	0	0.18	0	0	0	0.52	0	0	0.25	0	0	0	0.58	0.34	0	0	0	0.2	0
Peak_1174	1	64155126	64155151	+	ENSBTAG00000000210	High	OK	OK	0	0	0	0	0	0	0	0	0	0	0	0	0	0	0	0	0	0	0	0	0	0	0	0	0	0	0	0	0	0	0	0	0	0	0	0	0	0	0	0	0
Peak_1175	1	64157878	64157902	+			OK	OK	0	0	0	0.28	0	0.19	0	0	0	0.16	0.51	0	0	0.23	0	0	0	0	0.5	0	0	0	0	0.09	0	0.45	0	0	0	0	0	0	0	0	0	0	0	0	0	0.6	0.27
Peak_1176	1	64180130	64180144	+			OK	OK	0	0	0	0.04	0	0	0	0	0	0.16	0	0	0	0.46	0	0	0	0	0	0	0	0	0	0	0	0	0	0.52	0	0	1	0	0	0	0.29	0.17	0	0	0	0	0
Peak_1177	1	64189047	64189075	+	ENSBTAG00000000210	High	OK	OK	0	0	0	1.04	0.28	0	0.16	0.14	0.32	0	1.19	0	0.49	0.92	0	0.54	0	0	0.25	0.56	0	1.8	1.35	0.63	0	0.45	0	0	0.1	0	0	0	0	0	0	0.17	2.1	0	0	0.2	1.08
Peak_1178	1	64199992	64200003	+	ENSBTAG00000000210	Medium	OK	OK	0	0.11	0	0.08	0.56	0	0.16	0	0	0.48	0.34	0	0	0	0.26	0	0	0	0.5	0	0	0	0	0.09	0	0	0	0.52	0	0.12	0	0	0.81	0	0	0	0	0	0	0	0
Peak_1179	1	64201688	64201713	+	ENSBTAG00000000210	High	OK	OK	0	0.33	0	0.24	0	0	0.48	0	0.64	0	0	0	0	0	0	0	0	0.42	0	0	0	0	0	0.18	0.2	0	0	0	0	0.12	0.25	0	0.27	0	0	0	0	0	0.95	0.2	0
Peak_1180	1	64201952	64201964	+	ENSBTAG00000000210	Medium	OK	OK	0	0.33	0	0.08	0.84	0.19	0	0	0	0.32	0.34	0	0	0	0	0	0	0	0	0	0	0	0	0	0	0	0	0	0	0	0	0	0	0.37	0	0	0	0	0.38	0	0
Peak_1181	1	64215429	64215448	-			OK	OK	0.69	0.22	0	0	0	0	0	0	0.32	0	0	0	0	0	0	1.62	0	0	0	0	0.66	0	0	0.09	0	0	0	0	0	0	0	0	0	0	0	0	0	0	0	0	0
Peak_1182	1	64222874	64222897	-			OK	OK	0	0	0.14	0.2	0	0	0	0.14	0	0	0	0	0	0	0	0	0.26	0	0	0	0	0	0	0	0.2	0	0.1	0	0	0.12	0	0	0	0	0	0	0	0	0	0	0
Peak_1183	1	64232756	64232763	-			OK	OK	0	0	0.14	0	0	0	0	0	0	0	0	0	0	0	0	0	0	0	0	0.14	0	0	0	0	0	0	0	0	0.5	0	0	0	0	0	0	0	0	0	0	0	0
Peak_1184	1	64240532	64240603	-	ENSBTAG00000000213	High	OK	OK	6.67	7.92	10.22	5.88	1.68	19.57	14.88	7.14	3.2	5.6	8.5	19.04	13.23	5.52	0.52	9.72	4.81	8.82	12.5	6.72	11	12.96	13.77	11.34	10.9	21.6	16.6	21.84	7.2	8.16	5	7.03	9.72	3.33	5.51	2.38	2.1	5.33	2.09	2.4	5.94
Peak_1185	1	64240635	64240706	+			OK	OK	0.69	0.22	0.28	0	0	0.19	0	0	0	0.16	0	0	1.47	0	1.04	0.54	1.04	0	0	0	0	3.6	2.7	1.35	1.8	0	0.1	0	0.2	0	0	0	0	0	0	0	0	0.82	0	0	0
Peak_1186	1	64246525	64246587	-	ENSBTAG00000000213	Medium	OK	OK	2.99	1.32	1.4	1.8	0	1.33	1.12	2.1	3.52	0.64	0.68	3.4	1.96	4.6	4.68	1.08	2.6	1.05	0.75	0.56	1.54	5.76	7.29	6.57	6.6	0.9	1.1	1.56	0.3	1.32	0.25	0	0.54	0	0.58	1.36	1.26	2.87	2.09	4.8	2.97
Peak_1187	1	64246584	64246689	+	ENSBTAG00000008562	High	OK	OK	10.81	6.6	7.42	7.24	1.96	12.92	9.44	19.04	9.92	29.92	14.45	18.36	13.23	17.25	10.66	22.68	7.15	9.24	12.5	6.16	10.78	36	27.81	27.54	30.7	9.45	12.4	17.42	2	4.2	4	8.14	11.61	5.92	5.8	4.93	7.14	13.53	6.27	14.2	21.33
Peak_1188	1	64246991	64247005	-	ENSBTAG00000000213	Low	OK	OK	0	0	0	0	0	0	0	0	0	0	0.34	0	0	0	0	0	0	0	0	0	0	0.36	0.54	0.18	0	0	0	0	0	0	0	0	0	0	0	0	0	0	0	0	0
Peak_1189	1	64270555	64270561	+			OK	OK	0	0	0.14	0.16	0	0.95	0	0.84	0.32	0.96	0	2.04	0	0.46	0	0.54	0.52	0	0	0.56	0	0.36	0	0.36	0.2	0	0	0.52	0.1	0	0	1.11	0	0	0	0.51	0	0	0.19	0.4	0
Peak_1190	1	64275221	64275265	-			OK	OK	0.23	0	0.14	0.08	0	0	0.64	0.14	0	0	0	0.68	0	1.61	0.52	0	0.26	0.21	0.25	0.14	0.44	1.8	5.13	1.53	1.6	0.45	0	0.26	0.2	0	0.5	0	0	0	0	0.17	0	0	0	0.2	0
Peak_1191	1	64275321	64275461	+	ENSBTAG00000012581	High	OK	OK	7.82	4.18	7.14	5.28	1.96	9.88	9.92	20.02	3.84	15.52	9.01	19.04	14.7	13.8	4.68	6.48	4.55	10.08	11	2.52	9.02	31.32	17.28	12.96	25.7	7.2	13.6	13.78	4.2	3	2.75	2.59	9.99	11.47	8.99	7.31	8.82	7.79	11.97	5.8	12.96
Peak_1192	1	64323805	64323818	-	ENSBTAG00000018059	Medium	OK	OK	0	0	0	0	0	0	0	0	0	0	0	0	0	0	0	0	0	0	0	0	0	0	0	0	0	0	0.3	0	0	0	0	0	0	0	0	0	0	0	0	0	0
Peak_1193	1	64325049	64325181	-	ENSBTAG00000018059	High	OK	OK	2.76	1.54	5.04	1.88	0	2.47	5.44	0.42	1.6	0.48	2.55	2.04	0	2.76	0.26	1.08	0.13	8.82	6.75	2.94	11.88	3.6	0.81	3.96	0.3	30.15	6.6	13.78	13.8	3.72	1.75	9.62	7.56	0.74	0.87	2.21	5.04	1.64	2.47	3.2	2.97
Peak_1194	1	64329127	64329144	-	ENSBTAG00000018059	Low	OK	OK	0	0	0	0	0	0	0	0	0	0	0	0	0	0	0	0	0	0	0	0	0	0	0	0	0	0	0	0	0	0	0	0	0	0	0	0	0	0	0	0	0
Peak_1195	1	64334188	64334229	-			OK	OK	0	0	0	0.12	0	0.57	0	0	0	0.16	0.17	0.68	0	0	0.52	1.08	0.26	0	0	0	0	1.8	1.35	1.44	2.3	0	0	0.26	0	0	0	0.37	0	0	0	0.51	0.42	0.41	0	1	0
Peak_1196	1	64334214	64334316	+	ENSBTAG00000009391	High	OK	OK	3.22	2.31	2.24	4.16	5.32	3.99	8.96	5.88	2.56	8.32	24.31	17	14.7	6.9	3.12	4.86	2.99	3.57	4.25	6.02	3.08	8.28	3.24	6.12	5.9	0.9	4.5	7.8	1.4	1.32	3.25	1.11	3.24	1.85	6.09	1.53	1.26	6.56	2.28	4.4	2.7
Peak_1197	1	64343829	64343841	+			OK	OK	0	0	0.14	0	1.12	0	0.64	0.42	1.6	0.16	0	0	0	0	0.78	0.54	0.13	0.21	0	0	0.22	1.44	0	0.54	0.5	0.9	0	0	0	0	1	0	0.81	0.37	0	0	0	1.23	0	0	2.43
Peak_1198	1	64345232	64345241	+			OK	OK	0	0.33	0	0	0	0	0	0.56	0.32	0.64	0.51	0	0	0.23	0	0	0	0	0	0	0.22	0	0	0.18	0.1	0	0	0.26	0	0	0	0	0	0	0	0	0	0	0.57	0.2	0
Peak_1199	1	64347333	64347357	+			OK	OK	0	0	0	0	0.28	0	0	0	0	0	0	0	0	0	0	0	0.78	0	0	0.14	0	0	0	0.36	0	0	0.1	0	0	0	0	0	0	0	0	0	0	0	0	0	0
Peak_1200	1	64349886	64349973	+	ENSBTAG00000009391	High	OK	OK	0	0	0	0.36	0	0	2.24	0.42	0	0.32	0.68	1.36	1.96	2.3	0.78	2.7	0.91	0	0	0.28	0	2.88	2.16	4.68	0.6	0	0	0	0	0.12	0	0	0.27	0	0	0.85	0.42	0.41	0	1	3.51
Peak_1201	1	64384904	64384930	-			OK	OK	0	0	0	0	0	0	0	1.82	1.6	1.28	0	0	0	0	0	0	0	0	0	0	0	0	0	0	0.1	0	0	0	0	0	0	0	0	0	0	2.04	0	0.82	2.66	0	0
Peak_1202	1	64387662	64387737	-			OK	OK	0	0	0	0	0	0	0	0	0	0	0	0	0	1.84	0.52	2.16	0.91	0	0	0	0	0.72	0.54	0.18	0.6	0	0	0	0	0	0	0	0	0	0.58	0	0	0	0	0	0
Peak_1203	1	64387924	64387947	+			OK	OK	0	0	0	0	0	0	0	0	0	0	0	0	0	0	0	0	0	0	0	0	0	0	0	0	0	0	0	0	0	0	0	0	0	0	0	0	0	0	0	0	0
Peak_1204	1	64388450	64388466	+			OK	OK	0	0	0	0	0	0	0	0	0	0	0	0	0	0	0	0	0	0	0	0	0	0	0	0	0	0	0	0	0	0	0	0	0	0	0	0	0	0	0	0	0
Peak_1205	1	64394362	64394376	-			OK	OK	0	0	0	0	0	0	0	0.14	0	0	0	0	0	0	0	0	0	0	0	0	0	0	0	0	0	0	0	0	0	0	0	0	0	0	0	5.44	5.46	0	9.69	0	0
Peak_1206	1	64406066	64406169	-	ENSBTAG00000005604	Low	OK	OK	0	0	0	0.08	0	0	0	0	0	0	0	0	0	0	0	0	0	0	0	0	0	0	0	0	0	0	0	0	0	0	0	0	0	0	0	0	0	0	0.38	0	0
Peak_1207	1	64414831	64414861	-	ENSBTAG00000005604	High	OK	OK	0	0	0	0	0	0	0	0.42	0	0.16	0	0	0	0	0	0	0	0	0	0	0	0	0	0	0	0	0	0	0	0	0	0	2.16	4.81	3.48	0	0	0	0	0	0
Peak_1208	1	64415620	64415644	-	ENSBTAG00000005604	High	OK	OK	0	0	0.42	0	0	0	0	7.42	1.28	8.48	0	0	0	0	0	0	0	1.05	0.75	0.98	0.22	0	0	0	0	0.45	0.4	0	0	0	0	0	0.54	0	0.58	12.41	17.22	6.56	10.26	0	0
Peak_1209	1	64415891	64415907	+			OK	OK	0	0	0	0	0	0	0	0	0	0	0	0	0	0	0	0	0	0	0	0	0	0	0	0	0	0	0	0	0	0	0	0	0	0	0	2.21	1.68	4.92	0.57	0	0
Peak_1210	1	64432861	64432951	-	ENSBTAG00000002182	High	OK	OK	37.95	12.65	22.54	29	19.32	35.72	39.04	29.26	8.32	47.84	28.22	59.16	39.69	46.46	34.84	39.42	19.63	23.52	33	9.1	23.76	33.84	62.1	40.95	56.7	17.55	18.5	36.4	11.6	8.28	6.25	6.66	54.81	51.43	93.38	57.97	125.58	118.08	38.57	20.4	14.58
Peak_1211	1	64432958	64432964	+			OK	OK	0	0.33	0	0	0	0	0	0	0	0	0	0	0	0	0	0	0	0	0	0	0	0.36	0	0.9	0.2	0	0	0	0	0	0	0	0	0	0	0	0	0	0	0	0
Peak_1212	1	64451310	64451394	+	ENSBTAG00000001293	High	OK	OK	0	0.33	0.7	1.92	0	0.57	1.28	2.38	0.64	4.64	0.85	2.72	0.98	2.99	1.3	2.7	1.17	3.15	0.25	0.56	1.54	4.32	2.16	5.13	5	0.45	0.6	1.3	0	0.48	0	0	1.08	0	0.29	0.34	2.1	0	0.76	0.4	0
Peak_1213	1	64475825	64475836	-			OK	OK	0	0	0	0	0	0	0	0	0	0	0	2.04	0	0	0	0	0	0	0	0	0	0	0	0	0	0	0.4	0	0	0	0	0	0	0	0.29	0	0	0	0	0	0
Peak_1214	1	64548073	64548081	+			OK	OK	0	0	0	0.04	0	0	0.32	0	0	0	0	0	0	0	0	0.54	0	0	0	0	0	0	0	0	0.4	0	0	0.78	0	0	0	0	0	0	0	0	0	0	0	0.6	0
Peak_1215	1	64606525	64606721	+	ENSBTAG00000019557	High	OK	OK	0.23	0	0	0.08	0	0	0	0	0.32	0	0	2.04	0	0	0	0	0	23.52	86.75	21.98	50.6	0	0	0	0.1	125.55	66.5	164.32	30.1	57.72	30.25	29.6	0	0	0	0	0	0	0	0	0
Peak_1216	1	64630250	64630264	-			OK	OK	0	0	0	0	0	0	0	0	0	0	0	0	0	0	0	0	0	0	0	0	0	0	0	0	0	0	0	0	0	0	0	0	0	0	0	0	0	0	0	0	0
Peak_1217	1	64644397	64644412	-			OK	OK	0	0	0	0.08	0	0.19	0	0	0	0	0	0	0	0.46	0	0	0.39	0	0	0	0.22	0	0	0.09	0.2	0.45	0.1	0	0.2	0	0	0	0	0	0	0	0	0	0.38	0	0
Peak_1218	1	64644485	64644511	-			OK	OK	0	0	0	0	0.28	0	0.16	0	0.32	0	0	0	0	0	0	0	0.13	0	0.5	0	0	0	0	0.18	0.2	0	0.3	0	0.1	0	0	0	0	0	0	0.34	0	0	0	0	0
Peak_1219	1	64646580	64646624	-	ENSBTAG00000048057	High	OK	OK	0	0.11	0.28	0.2	0	0.38	0.32	0.98	0	0.32	0	0	0	1.15	0	1.08	0.13	0.21	0	0	0.22	0.36	1.08	1.44	0.6	0	0.4	0.26	0	0	0	0	0	0	0.29	0	0	0	0.76	0	0.54
Peak_1220	1	64671800	64671813	-			OK	OK	0	0	0	0.32	0	0	0	0	0	0.32	0	0	0	0	0.26	0.54	0	0	0	0.42	0.22	0	0	0.18	0.1	0.45	0	1.04	0	0	0	0	0	0	0.29	0	0	0	0.19	0.2	0
Peak_1221	1	64691766	64691783	-	ENSBTAG00000048057	High	OK	OK	0	0	0	0	0	0	0	0	0	0	0	0	0	0	0	0	0	0	0	0	0	0	0	0	0	0	0	0	0	0	0	0	0	0	0	0	0	0	0	0	0
Peak_1222	1	64701600	64701601	-			OK	OK	0	0	0	0	0	0	0	0	0	0	0	0	0	0	0	0	0	0	0	0	0	0	0	0	0.3	0	0	0	0	0	0	0	0	0	0	0	0	0	0	0	0
Peak_1223	1	64702283	64702298	-			OK	OK	1.15	0.33	0.7	0.04	0	0.57	0	0	0	0.32	0.17	0	0	0.46	0	0	0	0	0.75	0	0.44	0	0	0	1	0	0.1	0.78	0	0.24	0.5	0	0.54	0	0	0.34	0	0	0.38	0	0
Peak_1224	1	64702473	64702487	-			OK	OK	0.46	0	0.42	0.08	0	0	0	0	0	0	0	0	0	0	0	0	0	0.42	0	0	0	0	0	0	0.6	0	0.1	0	0	0	0	0	0	0	0	0	0	0	0	0	0
Peak_1225	1	64728450	64728469	-			OK	OK	0.23	0.33	0	0	0	0	0	0	0	0.16	0	0	0	0	0	0	0	0	0	0.42	0	0	0	0.36	0	0	0	0.26	0	0	0	0	0	0.74	0	0	0	0	0.19	0	0
Peak_1226	1	64752879	64752881	-			OK	OK	0	0	0	0	0	0	0.16	0	0	0	0	0	0	0	0	0	0	0	0	0	0.22	0	0	0.36	0.4	0	0.1	0	0	0	0	0.37	0	0	0	0.17	0	0	0	0	0
Peak_1227	1	64769921	64769966	-			OK	OK	0	0	0.28	0.08	0	0	0.32	0	0.32	0	0	0	0.49	0	0	0	0	0	0	0.14	0	0	0.27	0.27	0.5	0	0	0	0	0	0	0.37	0	0	0	0	0	0	0	0	0
Peak_1228	1	64778455	64778468	-			OK	OK	0.46	0	0	0	0	0	0.32	0	0	0	0	0	0	0	0	0	0	0	0	0	0	0	0	0.09	0.1	0	0	0	0	0	0	0	0	0	0	0	0	0	0.95	0	0
Peak_1229	1	64823985	64823991	-			OK	OK	0	0	0.14	0	0	0	0	0	0	0	0	0	0	0	0	0	0	0	0	0	0.44	0	0	0.09	0.4	0	0	0	0	0	0	0	0	0	0	0	0	0	0.57	0	0
Peak_1230	1	64827969	64827988	-			OK	OK	0	0	0	0	0	0	0	0	0	0.16	0.51	0	0	0	1.04	0	0	0	0.75	0.14	0.22	0.36	0	0	0	0	0.4	0.78	0	0	0.5	0	0	0	0	0	0	0	0	0	0
Peak_1231	1	64831353	64831369	-			OK	OK	0	0.11	0.14	0.04	0	0	0	0	0	0	0.34	0	0	0	0	0	0	0	0	0	0	0.72	0.81	0.36	0.2	2.25	0	0.52	0	0	0	0	0	0.37	0	0	0	0	0.38	0.2	1.62
Peak_1232	1	64854527	64854579	-			OK	OK	0	0	0	0	0	0	0	0	0	0	0	0	0	0	0	0	0	0	0	0	0	0	0	0	0	0	0	0	0.2	0	0	0	0	0	0	0	0	0	0	0	0
Peak_1233	1	64858051	64858065	-			OK	OK	0	0	0	0	0	0	0	0	0	0.16	0.34	0	0	0	0	0	0	0.21	0	0	0	0.36	0	0	0.2	0	0	1.04	0	0	0	0	0	0	0	0	0	0	0	0	0
Peak_1234	1	64858302	64858318	-			OK	OK	0	0	0	0.04	0	0	0	0	0.32	0.48	0	0	0	0	0	0	0.39	0	0	0	0	0	0	0.18	0.3	0.45	0.1	0	0	0	0	0	0	0	0.58	0.17	0	0.41	0	0.2	0
Peak_1235	1	64861289	64861339	+			OK	OK	0.69	0	0.14	0.24	0	0	0.64	0.14	0	0	0.34	0	0.49	1.38	0.26	0	0.13	0	0.75	0.14	0.22	0.72	0.54	1.89	0	0	0.1	0.78	0.5	0.12	0	0	1.08	0	0.29	0	0	0	0.19	0	0.27
Peak_1236	1	64861849	64861901	-	ENSBTAG00000048057	High	OK	OK	10.35	3.63	9.94	14.52	16.24	12.16	11.04	6.16	3.84	11.84	31.96	17.68	10.78	25.07	17.94	26.46	11.18	6.3	9.25	9.38	17.82	38.88	28.62	58.5	27.5	9	8.3	13.78	7.1	5.76	1.5	3.7	14.31	7.03	9.86	4.59	8.82	7.38	8.55	4.2	15.66
Peak_1237	1	64862417	64862507	-	ENSBTAG00000048057	Low	OK	OK	1.84	0	0.28	0.16	0	0	0	0.42	0	0	0.51	0	0	0	0	0	0	0.42	0	0.42	0.22	0.36	0	0.18	0.1	0.9	0.9	0.78	0.1	0.6	0	0	0.27	0	0.29	0.85	0.42	0	0.19	0	0
Peak_1238	1	64862655	64862667	+			OK	OK	0	0	0	0.04	0	0.19	0.16	0	0	0	0	0	0.49	0	0.26	0	0	0	0	0	0	0	0.27	0.99	0.2	0	0	0	0	0	0	0	0	0	0	0	0	0	0	0.2	0
Peak_1239	1	64907562	64907618	+			OK	OK	0	0	0	0.16	0	0	0	0	0	0	0	0	0	0	0	0	0	0	0	0	0	0	0	0	0	0	0	0	0	0	0	0	0.81	0	0	0	0	0	0	0	0
Peak_1240	1	64928324	64928348	-	ENSBTAG00000048057	High	OK	OK	0	0	0	0.08	0.28	0	0	0	0	0	0	0	0	0	0	0	0	0	0	0	0	0	0	0	0	0	0	0	0	0	0	0	0	0	0	0	0	0	0	0	0
Peak_1241	1	64930008	64930029	-	ENSBTAG00000048057	High	OK	OK	0	0	0	0	0	0	0	0	0	0	0	0	0	0	0	0	0	0	0	0	0	0	0	0	0	0	0	0	0	0	0	0	0	0	0	0	0	0	0	0	0
Peak_1242	1	65046705	65046750	-	ENSBTAG00000001464	High	OK	OK	0	0	0	0.88	1.68	0.19	0.48	0.14	0	1.12	0.51	0	1.47	0.46	0	1.62	0.39	2.1	0	0	0	1.8	4.59	1.98	2.3	0	0.1	0.78	0	0	0.25	0	0.27	0	0	0.34	0	0	0	0.4	0.54
Peak_1243	1	65046929	65046970	+			OK	OK	0	0.33	0	0.32	0	0	0.64	0	0	0.16	0	0	0	0.69	0	0	0	0	0	0	0.22	0	0	0.09	0.9	0	0	0	0	0.36	0	0	0	0	0	0	0	0	0	0	1.89
Peak_1244	1	65074284	65074295	-			OK	OK	0	0	0.14	0.12	0	0	0.16	0	0.32	0.48	0	0	0	0	0	0	0.13	0	0	0.28	0	0	0	0	0	0	0.3	0	0	0.12	0	0	0.27	0.74	0	0.34	0	0	0.19	0	0
Peak_1245	1	65075712	65075737	-			OK	OK	0	0.22	0.14	0.24	0.56	0	0	1.4	1.28	2.08	1.7	0	0.49	0.69	1.82	0	0	0	0	0.28	0.22	0	0	0	0	0	0	1.56	0	0	0	0	0.27	0.74	0	0.51	0	0	0.19	0	0
Peak_1246	1	65077399	65077543	-			OK	OK	0	0.44	0.56	0.08	0	0	0	1.12	1.28	0.16	0.17	0	0.49	0.23	0	0	0.39	0.42	0	0.42	0	0.36	0	0	0.3	0	0.7	0.52	0.5	1.32	0.25	0	0	0	0	0	0	0.41	0	0	0
Peak_1247	1	65077911	65077926	-			OK	OK	0.23	0	0.28	0	0	0	0.16	0	0	0	0	0	0	0	0	0	0	0.21	0	0.14	0	0	0	0	0	0	0.1	0	0	0.12	0	0	0	0	0	0	0	0	0	0	0
Peak_1248	1	65096353	65096367	-	ENSBTAG00000033170	High	OK	OK	0	0	0	0.64	0	0.38	1.12	0.56	0	0.64	0.68	0.68	0	0.92	1.04	0.54	0.13	0.42	0	0.28	0.22	1.44	0	1.35	0.5	0.9	0.1	0.26	0.3	0.24	0.5	0	0.81	0	0	0.17	0	0	0.19	0.2	0.81
Peak_1249	1	65096589	65096718	-	ENSBTAG00000033170	High	OK	OK	5.52	1.65	4.48	9.6	3.08	8.93	26.24	32.06	6.4	18.88	25.16	21.08	18.13	6.67	4.94	7.56	4.42	8.82	2.75	3.36	6.38	10.08	10.26	11.88	14.9	7.2	8.3	12.48	6.2	3.48	1.25	0.74	17.55	10.73	4.64	4.25	3.78	9.02	4.56	4	7.29
Peak_1250	1	65096737	65096855	+			OK	OK	0.69	0	0	0.28	0	0.95	0.16	0.14	0	0	0.17	0.68	0	0	0	0	0.13	0	0	0	0	0.72	0.27	1.17	0.9	0	0.1	0	0.3	0.12	0	0.37	0	0	0.58	0	0	0	0	0.4	1.08
Peak_1251	1	65139428	65139453	-	ENSBTAG00000022155	Medium	OK	OK	0	0	0.28	0.28	0	0.57	0.8	0.28	0.32	0.16	0.17	0	0	0	0	0	0	0.84	0	0	0.88	0	0	0	0	0	0.3	0.26	0	0	0	0	0.81	0.74	0	0.17	1.26	0	0.76	0	0
Peak_1252	1	65139693	65139705	-	ENSBTAG00000022155	High	OK	OK	0	0	0.14	0.36	1.68	0	0.16	0.28	0.96	0	0.68	0	0	0	0	0	0	0	0.25	0	0	0	0	0	0	0	0.1	0	0.3	0.12	0	0.37	0	0	0	0.34	0	0	0.38	0	0
Peak_1253	1	65139959	65140010	-	ENSBTAG00000022155	High	OK	OK	0	0	0.7	0.36	2.24	1.52	0.32	0.28	1.92	0	0	0	0	0	0	0	0	0.63	0.75	0.14	0.22	0	0	0.09	0	0.9	0	0	0	0.24	0	0	0.27	0.74	0	0.68	0	1.64	0.76	0	0
Peak_1254	1	65140197	65140211	-	ENSBTAG00000022155	High	Low_H3K4me3	OK	0	0.11	0.14	1.52	0.28	3.42	2.24	1.4	0.96	3.2	0.68	0.68	0.49	0	0	0	0	0.42	0	0.14	0.22	0.36	0	0.27	0.1	0.45	0	0	0	0	0	0	1.08	0.37	0	0.85	0.42	1.23	0.38	0	0
Peak_1255	1	65179188	65179201	-			OK	OK	0.23	0	0	0.12	0	0	0	0.84	0.32	0.96	0.34	0	0	0	0.52	1.08	0	0	0	0	0	0	0	0	0	0	0	0	0	0	0	0	0.27	0.74	0	0	0	0	0.38	0	0
Peak_1256	1	65198274	65198410	-	ENSBTAG00000022155	High	OK	OK	39.56	23.65	78.12	347.96	117.88	560.69	375.68	318.5	135.36	385.92	222.7	427.72	238.63	23	12.22	37.8	11.83	120.54	73.25	42.84	110.66	11.52	11.07	38.16	12.7	58.95	79.8	70.72	21	29.16	10.75	13.69	299.16	146.52	64.38	104.21	122.22	61.91	91.2	11.6	7.29
Peak_1257	1	65266333	65266380	-	ENSBTAG00000022155	Medium	OK	OK	0	0	0	0	0	0	0	0	0	0	0	0	0	0	0	0	0	0	0	0	0	0	0	0	0	0	0	0	0	0	0	0	0	0	0	0	0	0	0	0	0
Peak_1258	1	65275349	65275351	-			OK	OK	0	0	0	0	0	0	0	0	0	0	0	0	0	0	0	0	0	0	0	0.56	0	0	0	0	0	0	0.6	0	0.1	0	0.25	0	0	0	0	0	0	0	0	0	0
Peak_1259	1	65318220	65318402	+	ENSBTAG00000015892	High	OK	OK	44.62	23.76	26.88	32.96	11.76	14.44	25.44	57.54	13.12	50.24	11.9	52.36	32.83	74.29	63.96	49.68	23.01	41.58	30.5	7.14	38.94	62.28	88.29	65.25	94.1	29.7	22	48.1	51.1	18.36	10.5	11.1	65.07	58.83	55.39	192.61	376.74	168.92	95.19	14.8	22.68
Peak_1260	1	65318294	65318311	-			OK	OK	0	0.22	0	0.04	0.84	0	0	0.14	0	0	0.51	0	1.47	0.46	0.78	2.16	0.65	0	0	0	0	0.72	1.35	3.06	2.5	0	0	0	0	0	0	0	0.27	0	0.58	0.85	1.26	0.41	1.14	0.6	0.27
Peak_1261	1	65364065	65364085	+			OK	OK	0	0	0	0	0	0	0	0	0	0	0	0	0	0	0	0	0	0.21	1.5	0	0	0	0	0	0	0	0	0	0.1	0	0	0	0	0	0	0	0	0	0	0	0
Peak_1262	1	65380569	65380770	-	ENSBTAG00000015895	High	OK	OK	0	0	0	0	0.84	0	0.32	0	0	0	0	0	0	0	0	0	0	0	0	0	0	0	0	0	0	0	0	0	0	0	0	0	0	0	0	0.17	0	0.82	0	0	0
Peak_1263	1	65418310	65418327	+	ENSBTAG00000016848	Medium	OK	OK	0	0.22	0.56	0.04	0	0	0	0	0	0	0.68	0.68	0.49	0.23	0	0	0	0	0	0	0	0	0	0	0	0	0.1	0	0	0	0	0	1.08	0	0	0.17	0	0	0	0.2	0
Peak_1264	1	65433687	65433711	+	ENSBTAG00000016848	High	OK	OK	0	0	0	0	0	0	0	0	0	0	0	0	0	0	0	0	0	0	0	0	0	0	0	0	0	0	0	0	0	0	0	0	0	0	0	0	0	0	0	0	0
Peak_1265	1	65433949	65434003	-	ENSBTAG00000015898	High	OK	OK	9.2	5.39	4.34	7.04	1.96	15.39	7.04	12.18	3.84	11.68	3.57	12.24	8.33	12.88	10.14	14.04	5.46	7.77	8.5	4.2	14.08	12.96	9.18	16.29	18.7	6.75	5.4	10.4	7.2	6.36	3.25	4.44	7.83	11.47	11.02	13.09	14.7	6.97	11.59	7.8	17.55
Peak_1266	1	65434055	65434277	+	ENSBTAG00000016848	High	OK	OK	9.2	5.83	8.4	7.28	2.24	12.73	12.96	11.48	3.2	9.44	7.14	10.2	11.76	9.66	7.28	10.26	6.89	11.97	5.5	2.8	9.9	37.08	19.17	19.62	24.6	15.3	13.1	17.16	11.1	6.36	4.75	6.66	18.36	17.02	21.75	5.78	7.56	17.22	6.65	6.2	13.5
Peak_1267	1	65434443	65434480	-	ENSBTAG00000015898	High	OK	OK	0.23	0	0	0.08	0	0	0	0	0	0.48	0	0	0	0.23	0	0	0.13	0.21	0	0	0	0.72	0	0.09	0.4	0	0	0	0	0	0	0	0.54	0	0.58	0	0	0	0	0.4	0.27
Peak_1268	1	65434505	65434516	+	ENSBTAG00000016848	Medium	OK	OK	0	0	0	0	0	0	0	0	0	0	0	0	0	0	0	0	0	0	0	0	0	0	0	0	0	0	0	0	0	0	0	0	0	0	0.29	0	0	0	0	0	0
Peak_1269	1	65468526	65468548	+			OK	OK	0	0	0	0	0	0	0	0	0	0	0	0	0	0.23	0.52	0	0	0	0.25	0	0	2.16	0	0	0	0	0	0	0	0	0	0	0	0	0	0	0	0	0	0	0
Peak_1270	1	65505956	65505971	+	ENSBTAG00000001918	Medium	OK	OK	0	0	0	0	0	0	0	0	0	0	0	0	0	0	0	0	0	0	0	0	0	0	0	0	0	0	0	0	0	0	0	0	0	0	0	0	0	0	0	0	0
Peak_1271	1	65522830	65522832	-			OK	OK	0	0.11	0.14	0	0	0	0	0.42	0	0	0	0	0	0	0	0	0	0.21	0	0	0	0	0	0	0	0	0.2	0	0.1	0.12	0	0	0	0	0	0	0	0	0	0	0
Peak_1272	1	65607540	65607656	+	ENSBTAG00000001918	High	OK	OK	0.46	0.33	0.42	0.04	0	0	0.32	1.68	0	1.76	0.17	0	0	18.4	9.1	24.84	9.1	0	0	0	0.44	72.36	43.2	81.99	74	0	0.2	0	0.1	0.72	0.25	1.85	0	0	1.16	0	0	0	0	2.4	3.24
Peak_1273	1	65608109	65608183	+	ENSBTAG00000001918	High	OK	OK	0	0.11	0.14	0	0	0	0	0	0	0	0	0	0	2.99	3.9	1.08	1.56	0	0	0	0	38.52	17.01	26.37	18.3	0	0	0	0	0.72	0	0	0	0	0	0	0	0	0	1.2	1.89
Peak_1274	1	65753155	65753172	+			OK	OK	0	0	0	0	0	0	0	0	0	0	0	0	0	0	0	0	0	0	0	0	0	0.72	0.27	0	1.9	0	0	0	0	0	0	0	0	0	0	0	0	0	0	0	0
Peak_1275	1	65791224	65791235	-			OK	OK	0	0	0	0	0	0	0	0	0	0	0	0	0	0	0	0	0	0	0	0	0	0	0	0	0	0	0	0.26	0	0	0	0	0	0	0	0	0	0	0	0	0
Peak_1276	1	65878750	65878766	-			OK	OK	0	0	0	0	0	0	0	0	0	0	0	0	0	0	0	0	0	0	0	0	0	0	0	0	0	0	0	0	0	0	0	0	0	0	0	0	0	0	0	0	0
Peak_1277	1	65888586	65888587	+			OK	OK	0	0	0	0	0	0	0	0	0	0	0	0	0	0	0.26	0	0	0	0	0	0	1.08	2.7	0.81	0.2	0	0	0	0	0	0	0	0	0	0	0	0	0	0	0	0
Peak_1278	1	65893796	65893808	+			OK	OK	0	0	0	0	0	0	0	0	0	0.16	0	0	0	0.23	0	0.54	0.13	0	0	0	0	4.32	0.81	0.36	1	0	0	0	0	0	0	0	0	0	0	0	0	0	0	0	0
Peak_1279	1	65901787	65901800	-			OK	OK	0	0	0	0	0	0	0	0	0	0	0	0	0	0	0	0	0	0	0	0.14	0	0	0	0	0	0	0	0	0	0	0	0	0	0	0	0	0	0	0	0	0
Peak_1280	1	65931704	65931705	+			OK	OK	0	0	0	0	0	0	0	0	0	0	0	0	0	0	0	0.54	0	0	0	0	0.66	1.44	0	1.35	0.1	0	0	0	0	0	0	0	0	0	0	0	0	0	0	0	0
Peak_1281	1	66049965	66050025	-	ENSBTAG00000001920	High	OK	OK	6.44	1.1	2.94	1.2	0.56	0.95	0.16	0.98	0.32	0.16	3.06	5.44	2.45	0.23	0	0.54	0.52	8.82	4	5.04	5.72	2.16	0	1.62	1.6	4.95	9.3	10.14	3.2	0.84	6.5	5.55	1.89	2.22	0.29	0	0.42	1.23	0.95	0.6	0
Peak_1282	1	66092182	66092342	+	ENSBTAG00000014508	High	OK	OK	0.46	1.54	0.14	2.4	0.28	0.19	0.16	0.14	0	0	1.19	1.36	0.49	0.23	0	0	0.13	0.21	0	0	0	0	0	0.36	0.2	0	0	0	0	0	0	0	4.86	1.85	4.06	60.35	133.14	101.27	116.85	0.2	0
Peak_1283	1	66092620	66092645	+	ENSBTAG00000014508	High	OK	OK	1.61	0.77	0.28	0	0	0	0	0	0	0	0	0	0	0	0	0	0	0	0	0	0	0	0	0.09	0	0	0	0	0	0	0	0	0	0	0	32.98	30.24	54.53	49.21	0	0
Peak_1284	1	66092684	66092713	-	ENSBTAG00000052248	High	OK	OK	0	0	0	0	0	0	0	0	0	0	0	0	0	0	0	0	0	0	0	0	0	0	0	0	0	0	0	0	0	0	0	0	0	0	0	0	0.42	0	0	0	0
Peak_1284	1	66092684	66092713	-	ENSBTAG00000001920	High	OK	OK	0	0	0	0	0	0	0	0	0	0	0	0	0	0	0	0	0	0	0	0	0	0	0	0	0	0	0	0	0	0	0	0	0	0	0	0	0.42	0	0	0	0
Peak_1285	1	66113940	66113955	-	ENSBTAG00000001009	High	Low_H3K4me3	OK	0	0	0	0	0	0	0	0	0	0	0	0	0	0	0	0	0	0	0	0	0	0	0	0	0	0	0.2	0.26	0	0	0	0	0	0	0	0	0	0	0	0	0
Peak_1286	1	66130126	66130128	-			OK	OK	0	0.11	0	0	0	0	0	0	0	0	0	0	0	0	0	0	0	0	0	0	0	0	0	0	0	0	0.1	0	0.1	0	0	0	0	0	0	0	0	0	0	0	0
Peak_1287	1	66145638	66145792	-	ENSBTAG00000001009	High	OK	OK	4.14	4.73	4.62	8.8	8.12	16.53	20.16	7.98	2.56	4	38.25	63.92	35.28	16.33	5.72	9.18	4.55	23.31	45.5	17.64	23.54	5.76	3.78	7.74	2.6	38.7	50.7	105.04	18.9	6.48	20.25	7.77	9.45	4.44	6.09	7.14	10.92	9.84	5.89	15.8	12.42
Peak_1288	1	66151269	66151277	-			OK	OK	0	0	0	0.12	0	0	0	0	0	0	0	0	0	0	0	0	0	0	0	0.14	0	0	0	0	0	0	1.4	0	0	0	0.25	0.74	0	0	0	0	0	0	0	0	0
Peak_1289	1	66156791	66156803	-	ENSBTAG00000008862	Medium	OK	OK	0	0	0.14	0.08	0	0	0.32	0	0.64	0	0.17	0	0	0	0	0.54	0	0	0	0.42	0	0	0	0	0.1	0	0.4	0	0	0	0.25	0	0	0	0	0	0	0	0	0	0
Peak_1290	1	66157767	66157782	-			OK	OK	0	0	0	0.08	0	0	0	0	0	0	0	0	0	0.92	0	0.54	0	0	0	0.14	0	0	0	0	0.4	0.45	0	0.52	0	0	0	0	0	0	0	0	0	0	0.19	0	0
Peak_1291	1	66169664	66169677	-	ENSBTAG00000008862	High	OK	OK	0	0	0	0	0	0	0	0	0	0	0	0	0	0	0	0	0	0	0	0	0	0	0	0	0	0	0	0	0	0	0	0	0	0	0	0	0	0	0	0	0
Peak_1292	1	66177805	66177834	-	ENSBTAG00000008862	High	OK	OK	0	0.22	0.56	0.48	3.08	0.19	0	0.14	0.96	0	1.36	0	0	0.46	0	0	0.13	0	0.25	0.56	0.88	0	0	0.27	0	0.9	0.7	0.78	0.3	0.48	0.25	0	0.27	1.11	0	0.51	0	0	0.19	0	0.81
Peak_1293	1	66181060	66181075	-	ENSBTAG00000008862	High	OK	OK	0.46	0.44	0	0.08	0	0	0	0.28	0.32	0	0	0	0	0.23	0	0	0	0.21	0.25	0.42	0.66	0.36	0	0	0	1.35	1.8	0.78	0.7	0.48	0	0.74	0	0	0	0	0	0	0.38	0	0
Peak_1294	1	66181681	66181875	-	ENSBTAG00000008862	High	Low_H3K4me3	OK	3.22	1.87	3.36	0.48	5.04	0.95	0.64	0.7	7.68	0.8	0.34	0	0.98	0	2.08	0	1.04	3.36	0.25	4.48	1.1	1.8	1.35	0.72	0.3	1.35	11.2	1.04	1.7	1.92	4.25	0.37	0.27	0	0.58	1.36	2.1	1.23	0.76	0.8	0.54
Peak_1295	1	66183788	66183832	-	ENSBTAG00000008862	High	Low_H3K4me3	OK	1.84	0.99	0.84	0.32	0.56	0.19	0.32	1.12	2.88	0.16	1.53	0	0.98	0.46	2.34	0	0.26	0.42	1	2.24	0.44	0.36	0	0.45	0.4	1.8	1.5	2.86	0.5	0.36	1.5	0	0.81	0	0	1.87	0	0.82	3.04	0.8	0
Peak_1296	1	66184725	66184808	-	ENSBTAG00000008862	High	OK	OK	2.3	0.22	1.4	0.2	0	0	0.64	0.14	2.88	0.32	0	0	0	0.46	1.56	1.08	0.13	0.42	0	0.28	0.44	0	0	0	0.2	0.45	1.7	0.78	0.2	0.6	1	0	0	0	0	0.51	0	0.41	0.76	0	0
Peak_1297	1	66187818	66187883	-	ENSBTAG00000008862	High	Low_H3K4me3	OK	0.69	0.33	1.26	0.52	0.28	0.19	0.16	0.42	3.2	0.16	0.34	0	0	0	0.26	0	0.65	0.84	0	2.8	1.32	0.72	0	0.18	0.1	0	3.3	1.82	1	1.08	1.25	0	0.27	0.74	0.29	0	0.42	0.41	0.57	0.4	0
Peak_1298	1	66207963	66207979	-			OK	OK	0	0	0	0.12	0	0	0.48	0	0	0	0	0	0	0	0	0	0	0.63	0.25	0	0	0	0	0	0.1	0	0.1	0	0	0	0	1.11	0	0	0	0.51	0	0	0	0	0
Peak_1299	1	66226021	66226033	-	ENSBTAG00000008862	High	OK	OK	0.23	0.11	0.7	0	0	0	0	0.14	0	0	0	0	0	0	0	0	0	0.63	0	0.7	0.88	0	0	0	0	2.25	0.3	1.04	1	0.24	0.25	0.74	0	0	0	0	0	0.41	0	0	0
Peak_1300	1	66226546	66226809	-	ENSBTAG00000008862	High	OK	OK	32.89	52.36	46.34	51.96	18.2	58.52	96.16	76.72	25.28	62.24	34.51	80.92	62.72	68.08	48.62	40.5	34.58	85.26	91.25	25.9	67.1	112.68	122.04	89.91	89.5	112.5	79.8	114.14	41.2	50.52	17.75	27.01	56.97	42.55	3.48	39.95	64.68	41	43.7	21.2	54
Peak_1301	1	66226892	66226918	+			OK	OK	0	0.11	0	0.12	0.56	0.38	0.16	0	0	0	0	0.68	0.49	0.23	0.52	2.16	0	0.63	0	0	0	0.36	0	0.63	1.2	0	0	0	0.3	0	0	1.11	0	0	0	0	0	0	0	0.6	0
Peak_1302	1	66264254	66264267	-	ENSBTAG00000013069	Medium	OK	OK	0	0	0	0	0	0	0	0	0	0	0	0	0	0	0	0	0	0.21	0	0	0.44	0	0	0	0	0	0.1	0	0.1	0.24	0.25	0.37	0	0	0	0	0	0	0	0	0
Peak_1303	1	66264926	66264932	+			OK	OK	0	0	0	0	0	0	0.16	0	0	0	0	0	0	0	0	0	0	0	0	0	0.88	0	0	0	0	0	0	0	0.9	0.12	0.25	0	0	0	0	0	0	0	0	0	0
Peak_1304	1	66284300	66284315	-			OK	OK	0	0	0	0	0	0	0	0	0	0	0	0	0	0	0	0	0	0	0	0	0	0	0	0	0.1	0	0.1	0	0.1	0	0	0	0	0	0	0.34	0	0	0	0	0
Peak_1305	1	66293880	66294006	-	ENSBTAG00000013069	High	OK	OK	2.53	1.65	3.5	2.92	1.68	5.89	7.52	7.56	2.88	5.28	3.4	3.4	4.41	7.36	8.06	4.86	4.55	7.77	6.75	4.76	5.28	17.28	11.34	19.08	15.4	8.1	6.8	11.18	7.9	3.12	1.25	6.29	5.13	9.62	5.22	3.74	6.72	2.87	6.46	3.8	5.4
Peak_1306	1	66294040	66294163	+	ENSBTAG00000013070	High	OK	OK	3.22	1.1	3.78	0.48	0.56	0	0.48	3.92	1.92	0.96	0.17	1.36	0.98	12.65	10.66	15.12	6.89	24.57	20.5	8.54	34.32	3.6	1.35	4.59	4.7	23.4	42.5	51.74	42.2	19.8	17.25	29.6	1.62	0	0	1.19	1.68	4.1	1.71	4.4	2.16
Peak_1307	1	66305821	66305826	+			OK	OK	0	0	0	0	0	0	0	0	0	0	0	0	0	0	0	0	0	0.42	0	0.14	0	0	0	0	0	0	0	0	0.5	0.24	0.25	0	0	0	0	0	0	0	0	0	0
Peak_1308	1	66365237	66365258	+	ENSBTAG00000033166	Low	OK	OK	0	0	0	0	0	0	0	0	0	0	0	0	0	0	0	0	0	0	0	0	0	0	0	0	0	0	0	0	0	0	0	0	0	0	0	0	0	0	0	0	0
Peak_1309	1	66366537	66366641	+	ENSBTAG00000033166	High	OK	OK	0	0	0	2.56	2.24	7.98	0.16	0.98	0	0.16	0	0	0	13.11	11.96	18.36	6.89	0.42	0	0	0	6.84	5.67	7.38	5.3	0	0	0	0	1.2	0.5	2.59	0.27	0	0	0.34	0	0.82	0	1.8	2.7
Peak_1310	1	66366912	66366996	-			OK	OK	0	0	0	1.32	0	3.61	0	0	0	0	0	0	0	3.22	4.68	0.54	1.43	0	0	0	0	2.52	0	0.99	0.4	0	0	0	0	2.4	0	0	0	0	0	0	0	0	0	1.6	0
Peak_1311	1	66410729	66410811	-			OK	OK	0	0	0	0	0	0	0	0	0	0	0	0	0	0	0	0	0	0	0	0	0	0	0	0	0	0	0	0	0	0	0	0	0	0	0	0	0	0	0	0	0
Peak_1312	1	66517213	66517323	-	ENSBTAG00000004705	High	OK	OK	0	0	0	0	0	0	0	0	0	0.16	0	0	0	0	0	0	0	5.04	8	2.66	3.96	0	0	0	0	12.6	5.2	15.08	1.2	1.92	0.25	1.48	0.27	1.48	0.87	0	0	0	0	0	0
Peak_1313	1	66544169	66544283	+	ENSBTAG00000013118	High	OK	OK	0.23	1.43	0.98	9.64	0.56	9.5	28.64	2.1	4.48	1.92	4.59	9.52	6.86	3.22	2.86	4.32	3.77	7.98	5.25	0.7	8.58	1.44	1.89	5.22	1	8.55	4.9	13.26	6.8	3.36	3.75	3.33	0.54	2.22	6.38	0.85	2.52	2.46	1.14	1.2	7.29
Peak_1314	1	66564878	66564970	+	ENSBTAG00000013118	High	OK	OK	0	0	0	0	0	0	0	0	0.32	0	0	0	0	0	0	0	0	0	0	0.14	0.44	0	0	0	0	2.7	1.9	3.64	0.1	0	0.25	0	0	0	0.29	0	0	0	0	0	0
Peak_1315	1	66565634	66565696	-	ENSBTAG00000004705	Medium	OK	OK	0	0	0	0	0	0	0	0	0	0	0	0	0	0	0	0	0	0	0	0	0	0	0	0	0	0	0.3	1.04	0	0	0	0	0	0	0	0	0	0	0	0	0
Peak_1316	1	66580426	66580445	+	ENSBTAG00000013118	Medium	OK	OK	0	0	0	0	0	0	0	0	0	0	0	0	0	0	0	0	0	0	0	0	0	0	0	0	0	0.9	0.3	0.26	0	0	0	0.37	0	0	0	0	0	0	0	0	0
Peak_1317	1	66598942	66598965	+	ENSBTAG00000013118	High	OK	OK	0	0	0	0	0	0	0	0	0	0	0	0	0	0	0	0	0	0	0	0	0	0	0	0	0	0	0	0	0	0	0	0	0	0	0	0	0	0	0	0	0
Peak_1318	1	66640431	66640446	-			OK	OK	0	0	0	0	0	0	0	0	0	0	0	0	0	0	0	0	0	0	0	7.98	0	0	0	0	0	0	1.7	0	0	0	4.25	0	0	0	1.45	0	0	0.82	0	0	0
Peak_1319	1	66655326	66655457	+	ENSBTAG00000003865	High	OK	OK	0	0	0.28	0	0	0	0	0	0	0	0	0	0	0	0	0	0	0	0	0	0	0	0	0	0	0	0.2	0.26	0	0	0	0	0	0	0	0	0	0	0	0	0
Peak_1320	1	66655923	66655933	-	ENSBTAG00000004705	Low	OK	OK	0	0	0	0	0	0	0	0	0	0	0	0	0	0	0	0	0	0	0	0	0.22	0	0	0.18	0	0	0.5	0.52	0	0	0	0	0	0	0	0	0	0	0	0	0
Peak_1321	1	66655968	66656057	+	ENSBTAG00000003865	High	OK	OK	0	0.11	0.28	0	0	0	0	0	0	0	0	0	0	0	0	0	0	1.26	1.25	0.84	0	0	0.27	0.09	0.4	0.45	2.7	5.2	0	0	0.25	0	0	0	0	0	0	0	0	0	0
Peak_1322	1	66757427	66757444	-	ENSBTAG00000004705	High	OK	OK	0	0	0	0	0	0	0	0	0	0	0	0	0	0	0	0	0	0	0	0	0	0	0	0	0	0.45	0.7	0	0	0	0	0	0	0	0	0	0	0	0	0	0
Peak_1323	1	66773065	66773092	+	ENSBTAG00000010688	High	OK	OK	0.46	0	0	0	0	0	0	0	0	0	0	0	0	0	0	0	0	279.3	252.75	24.36	409.86	0	0	0	0	56.25	22.2	65.26	0	0	0	0	26.73	5.92	0	0	0	0	0	0	0
Peak_1324	1	66777824	66777835	-	ENSBTAG00000004705	Low	OK	OK	0	0	0	0	0	0	0	0	0	0	0	0	0	0	0	0	0	0	0	0	0	0	0	0	0	0	0	0	0	0	0	0	0	0	0	0	0	0	0	0	0
Peak_1325	1	66804996	66805117	-	ENSBTAG00000054520	High	OK	OK	0	0	0.7	0	0	0	0	0	0	0	0	0	0	0	0	0	0	24.78	43	1.54	27.5	0	0	0	0	12.6	2.7	8.84	0	0	0	0.74	0	1.48	0	0	0	0	0	0	0
Peak_1326	1	66819060	66819128	-	ENSBTAG00000054520	High	OK	OK	41.86	52.58	88.9	50.16	25.48	66.12	79.84	62.02	20.48	40	23.63	61.88	67.13	43.7	58.5	35.64	23.27	104.16	109.25	17.64	117.48	59.04	80.19	64.71	51.1	159.75	87.5	135.98	14.4	73.68	10	85.84	137.97	65.12	123.25	192.1	320.04	222.22	139.08	19.4	35.1
Peak_1327	1	66820109	66820143	-	ENSBTAG00000054520	Low	OK	OK	0.92	0.11	0.28	0.2	0	1.14	0	0	0	0	0	0.68	0	0.23	0.78	0	0.52	0.63	0	0	0.22	1.44	1.62	0.27	1	0.9	0	0	0.2	0	0	0	0.27	0	0.29	0.85	0.42	0.41	0	0.6	0
Peak_1328	1	66820167	66820362	+	ENSBTAG00000011140	High	OK	OK	237.36	70.18	116.9	68	20.72	73.72	54.56	79.94	16.64	70.56	24.65	92.48	57.33	96.14	61.1	63.72	27.43	475.86	607.25	107.1	589.38	117.72	130.41	105.75	118.1	340.2	221.5	570.44	54.3	55.92	17.25	44.77	324.81	196.84	169.94	363.12	400.68	187.37	203.87	11.8	32.4
Peak_1329	1	66837973	66837987	+			OK	OK	0	0	0	0	0	0	0	0	0	0	0	0	0	0	0	0	0	0	2.25	0.14	0	0	0	0	0	0	0	0.52	0	0	0	0	0	0	0	0	0	0	0	0	0
Peak_1330	1	66847168	66847199	+	ENSBTAG00000011140	Low	OK	OK	4.14	0.99	0.98	1.6	0.84	3.42	4.96	6.44	2.24	3.84	0.85	1.36	1.47	0.23	0.78	0.54	0.39	4.62	4.25	0.14	3.08	2.52	4.86	1.08	2.5	4.5	0.2	3.9	4.1	3.84	0	0	4.86	3.33	0	2.89	3.78	0.82	0.95	0.2	1.89
Peak_1331	1	66855782	66855797	+	ENSBTAG00000011140	High	OK	OK	0	0	0.28	0	0	0	0	0	0	0	0	0	0	0	0	0	0	0.84	0	0	0	0	0	0	0	0	0.3	0	1.3	0	0	0	0	0	0	0	0	0	0	0	0
Peak_1332	1	66860675	66860720	+	ENSBTAG00000011140	Low	OK	OK	1.84	0.77	0	0.04	0	0	0	0	2.56	0	0	0	0	0	0	0	0	1.05	1.5	0.56	2.42	0	0	0	1	1.8	1.3	4.68	0.1	0	0	0	0	1.11	0	0.68	0	0	0.19	1.2	0
Peak_1333	1	66866324	66866390	-	ENSBTAG00000054326	High	OK	OK	4.83	1.43	3.36	2.88	0.56	3.61	4.96	3.08	1.6	4.48	1.7	2.04	5.39	3.91	2.08	3.78	2.34	1.68	2.5	0.28	6.16	6.12	7.02	7.56	9.3	4.05	3.1	3.38	3.7	1.8	0.5	1.85	2.43	0.37	2.03	2.89	3.78	3.69	3.23	2.2	2.43
Peak_1334	1	66866431	66866455	+			OK	OK	0.23	0	0	0	0	0	0	0	0.64	0	0	0	0	0.46	0	0	0	0	0	0	0	0	0	0.27	0.2	0	0	0	0.1	0	0	0	0	0	0	0	0	0	0.19	0.2	0
Peak_1335	1	66866644	66866684	+			OK	OK	0	0.22	0.28	0.24	0	0	0.16	0.42	0	0.16	0.51	0.68	0	0.92	0	0	0.13	0.42	1.5	0.14	0.22	2.16	2.43	0.72	0.7	0	0.9	0.52	0.5	0.84	0	0	0	0	0	0	0	0.82	0.38	0.6	1.62
Peak_1336	1	66873754	66873831	-			OK	OK	0.23	0.33	0.28	0.2	0	0	0.32	0.56	0.32	0.48	0	0	0	0.46	1.04	0	0.65	0.42	0	0.14	0.66	2.16	1.35	0.63	0.5	0	0.2	1.3	0.3	0.24	0	0	0.54	0	0	0.85	0	0	0	0.2	0
Peak_1337	1	66944280	66944361	-	ENSBTAG00000011143	High	OK	OK	64.17	33.66	40.6	96.04	47.6	100.89	74.4	127.82	62.08	210.56	129.03	144.84	111.23	309.81	149.76	316.44	91.78	64.26	106.25	62.02	51.04	172.8	173.34	241.2	162.3	84.15	121.1	102.18	26	39.6	36	23.68	91.53	142.45	169.94	32.13	50.4	58.22	39.33	30.4	122.04
Peak_1338	1	66944391	66944405	+			OK	OK	0	0	0	0	0	0	0	0	0	0	0	0	0	0	0	0	0	0	0	0	0	0	0	0	0	0	0	0	0	0	0	0	0	0	0	0	0	0	0	0	0
Peak_1339	1	66984630	66984720	-			OK	OK	0.69	0	0.28	0.04	0.56	0	0	0	0.64	0.16	0	0	0.98	0	0	0	0	0	2.25	0.28	0	0	0	0.09	0	0	1	0.52	0	0.12	0.25	0	0	0	0	0	0	0	0	0.2	0.81
Peak_1340	1	66987962	66988239	+	ENSBTAG00000009933	High	OK	OK	8.51	8.58	20.02	18.84	6.44	48.45	25.6	8.68	7.36	12.48	8.67	48.28	24.99	4.37	2.6	10.26	2.73	35.7	28.5	16.1	36.08	6.48	4.59	10.71	4	27.45	41.1	56.42	20.6	10.8	14.75	5.18	7.02	11.47	18.85	10.03	31.5	31.98	17.67	3.6	12.69
Peak_1341	1	66988060	66988134	-	ENSBTAG00000021791	High	OK	OK	4.37	3.74	5.18	2.48	0.84	13.68	9.44	0.7	1.6	0.64	1.87	9.52	8.33	0.46	0.26	5.4	0.26	4.83	4.75	3.08	12.1	0.36	0.54	2.07	0.7	11.25	6	15.6	5.5	2.76	1.75	0.37	1.08	1.85	3.19	2.38	2.1	9.02	2.28	1	1.62
Peak_1342	1	66988362	66988414	-	ENSBTAG00000021791	High	OK	OK	0.23	0.11	0.14	0.44	0	0	0	0	0	0.32	1.36	0.68	0.49	0	0	0	0	0	0	0	0.22	0	0	0.18	0.4	1.35	0.4	0.26	0.1	0	0	0	0	0	0.29	0.17	0	0.41	0	0	0
Peak_1343	1	67012025	67012049	+	ENSBTAG00000016656	High	OK	OK	0	0.22	0.14	0	0	0	0	0.14	0	0	0.17	0	0	0	0	0	0	0	0	0.42	0	0	0	0	0	0	0.2	0.52	0	0.12	0.25	0.74	0.27	0	0.58	0	0	0	0	0.2	0
Peak_1344	1	67012204	67012324	+	ENSBTAG00000016656	High	OK	OK	28.29	12.98	17.5	23.72	23.24	44.84	20	6.86	11.84	16.64	23.29	136	43.61	7.82	4.16	15.12	1.82	38.22	69.5	36.68	51.04	5.4	2.43	12.15	3.7	48.15	61.3	92.3	31.3	21	29.5	14.8	9.72	18.87	20.59	15.81	33.6	29.93	19.95	7.6	11.07
Peak_1345	1	67012605	67012708	-			OK	OK	1.15	2.31	0.84	0.04	0	0	0.16	0	0	0	0.17	1.36	0	0	0	0	0	1.05	2.25	1.26	1.32	0	0	0.18	0	4.05	4.8	10.14	0.4	0.96	0	2.22	0	0	0	0	0	0	0.19	0	0
Peak_1346	1	67030491	67030503	+	ENSBTAG00000016656	High	OK	OK	0	0	0.14	0	0	0.57	0.32	0	0	0.32	0	0	0	0	0	0	0	0.21	0	0.98	0.22	0	0	0.09	0	0	1.4	0.78	0.3	0	0.25	0	0	0	0	0	0	0	0	0	0
Peak_1347	1	67032076	67032084	+	ENSBTAG00000016656	High	OK	OK	0	0	0	0	0	0	0	0	0	0	0	0	0	0	0	0	0	0	0	0.14	0	0	0	0	0	0	0.3	0	0.1	0	0	0	0	0	0	0.34	0	0	0	0	0
Peak_1348	1	67032223	67032238	+	ENSBTAG00000016656	High	OK	OK	0.23	0.11	0.28	0	0	0	0	0	1.6	0	0.17	0	0	0.23	0	0	0	0.63	1	0.7	0.22	0	0	0.18	0	0	0.5	1.3	0.1	0	0	0	0	0	0	0.34	0.42	0	0	0	0
Peak_1349	1	67048401	67048412	+			OK	OK	0	0.11	0	0.12	0	0.38	0	0	0	0	0.17	0	0	0	0	0	0.26	0	0	0	0	0	0	0	0	0	0.1	0.26	0	0	0	0	0	0	0	0	0	0	0	0	0
Peak_1350	1	67120207	67120293	-	ENSBTAG00000005066	High	OK	OK	5.29	3.41	3.22	7.72	0.28	7.22	6.4	5.88	3.52	8.64	4.93	6.8	1.96	10.12	4.68	7.02	2.34	7.77	3.5	2.66	7.26	14.04	15.39	15.57	12.4	7.2	8	7.28	4	0.96	2.25	1.85	3.24	5.55	4.64	3.74	8.4	2.46	4.56	6.2	2.43
Peak_1351	1	67121320	67121376	+	ENSBTAG00000005071	High	OK	OK	1.84	0.66	0.42	1.04	0.28	0.95	0.16	1.96	0	1.12	4.08	1.36	0.98	0.92	1.3	2.16	0.13	0.63	1	0.28	0.66	0.72	0	1.89	0.5	0.45	1	0.52	0.6	0.84	0	0	1.89	0.37	1.45	1.02	0	0.41	0.38	0	0
Peak_1352	1	67121470	67121536	-	ENSBTAG00000005066	Low	OK	OK	0.23	0.77	1.4	0.28	0	0.19	0	0	0.96	0	0.34	0	0	1.84	1.82	4.86	1.3	0	0	0	0	1.44	1.08	0.99	1.9	0	0.4	0	0.1	0.48	0	0	0.27	0	2.03	0.34	0.42	1.23	1.52	0.6	0
Peak_1353	1	67121536	67121624	+	ENSBTAG00000005071	High	OK	OK	1.38	2.09	2.8	1.8	0	2.28	2.88	3.22	2.24	3.36	2.89	0.68	3.92	10.35	3.64	21.06	6.76	1.05	1.75	0.7	1.54	11.52	13.77	14.49	15.1	0.9	1	2.6	1.1	1.56	0.5	0.74	2.7	1.85	2.32	3.23	5.46	2.87	4.37	1.6	4.86
Peak_1354	1	67134428	67134443	+	ENSBTAG00000005071	Medium	OK	OK	0	0	0	0	0	0	0	0	0	0	0	0	0	0	0	0	0	0	0	0	0	0	0.81	0.72	0.8	0	0	0	0	0	0	0	0	0	0	0	0	0	0	0	0
Peak_1355	1	67285995	67286079	+			OK	OK	0.92	0.11	0.42	1.68	1.96	1.71	2.88	0.56	0.32	0.96	1.19	1.36	3.43	0.46	0.52	0	0.13	1.47	0	0.7	0.66	0	0	0.27	1.1	0.9	0.9	0.52	0.5	0	0	0.74	0.27	0.74	0	2.38	1.68	2.05	5.13	0	0
Peak_1356	1	67289360	67289376	+			OK	OK	0	0	0	0	0	0	0	0	0	0	0	0	0	3.91	0.78	3.24	0.78	0	0	0	0	0	0	0	0	0	0	0	0	0	0	0	0	0	0	0	0	0	0	0	0
Peak_1357	1	67386556	67386565	+			OK	OK	0	0	0	0.24	0	0	0	0	0	0	0	0.68	0	0	0	0	0	0	0	0	0	0	0	0	0	0	0	0	0	0	0	0	0.81	0	0	0.68	0	0	0	0	0
Peak_1358	1	67411394	67411530	+	ENSBTAG00000018877	High	OK	OK	2.53	3.52	6.02	8.12	3.64	10.26	4.96	6.72	1.92	14.4	11.56	9.52	10.29	3.68	1.04	3.78	1.43	12.6	14.5	8.4	12.32	3.96	1.62	3.06	3.1	17.1	14.2	15.34	14.8	11.52	9.5	3.33	1.89	1.85	0	1.53	6.72	1.64	5.51	3	0.27
Peak_1359	1	67478166	67478212	+	ENSBTAG00000018877	High	OK	OK	0	0	0	0	0	0	0	0	0	0	0	0	0	0	0	0	0	0.21	0	0	1.98	0	0	0	0	0.45	0.1	0	0.6	0.48	0	0.37	0	0	0	0	0	0	0	0	0
Peak_1360	1	67487674	67487686	+	ENSBTAG00000018877	Medium	OK	OK	0	0	0	0	0	0	0	0	0	0	0	0	0	0	0	0	0	0	0	0	0	0	0	0	0	0	0	0	0	0	0	0	0	0	0	0	0	0	0	0	0
Peak_1361	1	67555359	67555445	+	ENSBTAG00000014797	High	OK	OK	15.18	5.72	8.54	15.44	2.52	12.16	15.36	15.12	8	13.28	9.86	20.4	9.31	9.66	7.8	10.26	4.55	11.34	14.25	4.62	14.3	27	14.85	17.73	25.2	13.5	9.6	17.94	10.5	8.28	2.75	10.36	16.74	8.14	3.19	14.96	16.38	12.71	15.96	6.2	6.21
Peak_1362	1	67588295	67588299	+			OK	OK	0	0	0.14	0	0	0	0	0.14	0	0	0	0	0	0	0	0	0	0	0	0	0	0	0	0	0	0	0.1	0	0	0	0.25	0	0	0	0	0	0	0	0.57	0	0
Peak_1363	1	67622462	67622466	+			OK	OK	0	0	0	0	0	0	0	0	0.32	0	0	0.68	0	0	0	0	0	0	0	0	0	0	0.54	0	0.2	0	0	0	0	0	0	0	0	0	0	0	0	0	0	0	0
Peak_1364	1	67764544	67764617	-	ENSBTAG00000018777	Low	OK	OK	0	0	0	0	0	0	0	0	0	0	0	0	0	0.23	0	0	0	0	0	0	0	0	0	0	0	0	0	0	0	0	0	0	0	0	0	5.27	3.78	6.15	4.94	0	0
Peak_1365	1	67765953	67765963	-			OK	OK	0	0	0	0.12	0.84	0	0	0	0	0	0.51	0	0	0	0	0	0	0	0	0	0	0	0	0	0	0	0.1	0	0	0	0	0	0	0	0	0.17	0.84	0	0.19	0.2	0
Peak_1366	1	67785409	67785419	+			OK	OK	0	0	0	0.32	1.4	0	0	0	0	0	0.34	1.36	0	0	0	0	0	0	0	0	0	0	0	0	0	0	0.1	0.52	0	0	0	0	0	0	0	0	0.42	0	0	0	0
Peak_1367	1	67822129	67822153	+			OK	OK	0	0	0	0	0	0	0	0	0	0	0	0	0	0	0	0	0	0	0	0	0	0	0	0	0	0	0	0	0	0	0	0	0	0	0	3.23	3.78	4.51	5.51	0	0
Peak_1368	1	67822628	67822657	-	ENSBTAG00000018777	Medium	OK	OK	0	0	0	0.36	1.68	0.19	0.96	0	0	0.16	0.34	0	0	0	0	0.54	0	0.21	0	0	0	0	0.27	0.18	0.3	0	0	0.26	0	0	0	0	0	0	0	0.51	0	0.41	1.52	0.2	0.27
Peak_1369	1	67822749	67822815	+			OK	OK	0.69	0	0	1.8	0.56	1.9	2.4	1.68	0.96	3.2	7.48	1.36	1.96	1.61	2.34	0	0.52	2.31	0.25	0.14	1.76	0	0	0.36	0.6	0.45	2	2.86	0.2	0.24	0	0	0.54	0	0.58	3.06	2.1	4.92	4.37	2.4	0.81
Peak_1370	1	67823671	67823739	-	ENSBTAG00000018777	High	OK	OK	0	0	0	5.96	5.32	6.84	2.4	0.98	1.28	1.28	6.12	0.68	0.98	2.53	0.78	1.62	0.26	0.21	1.75	0.14	1.98	1.08	0	1.26	0.3	0.45	0	0.26	0.1	0	0	0.37	1.89	1.11	0.29	13.26	12.18	3.28	17.86	0.2	1.35
Peak_1371	1	67871858	67871862	-			OK	OK	0.23	0	0	0	0	0	0	0	0	0	0	0	0	0	0	0	0	0	0	0	0	0	0	0.09	0	0	0	0	0	0	0	0	0	2.22	0	0	0	0	0	0	0
Peak_1372	1	67873796	67873811	-			OK	OK	0	0	0	0	0	0	0	0.14	0	0	0	0	0	0	0	0	0	0	0	0	0	0	0	0	0.1	0	0.1	0	0	0	0	0	0	0	0	0	0	0	0	0	0
Peak_1373	1	67889086	67889109	-			OK	OK	0	0	0	0.04	0	0	0.16	0	0	0	0.17	0	0.49	0	0	0	0	0	0	0	0.22	0	0	0	0.2	0	0.2	0	0	0	0	0	0	0	0	0	0	0	0	0	0
Peak_1374	1	67931407	67931415	-			OK	OK	0	0	0	0	0	0	0.32	0	0	0	0	0	0	0	0.26	0	0	0	0	0	0	0	0	0	0.1	0	0	0	0	0	0	0	0	0	0	0	0	0	0	0	0
Peak_1375	1	67939203	67939214	-	ENSBTAG00000023607	Medium	OK	OK	0	0.11	0	0.08	0	0.19	0	0	0.64	0	0	0	0	0	0	0.54	0	0	0	0	0	2.16	0	0	0.2	0	0	0	0.1	0	0	0	0	0	0	0	0	0	0	0	0
Peak_1376	1	67939379	67939388	-	ENSBTAG00000023607	Low	OK	OK	0.23	0.11	0	0.04	0	0.19	0	0	0	0	1.19	0	0.49	0	0	1.62	0	0	0.25	0	0	0.36	0	0.18	0.3	0	0	0.26	0	0	0	0	0.27	0	0	0.34	1.26	0.41	0	0	0
Peak_1377	1	67950601	67950610	-			OK	OK	0.46	0.33	0.14	0	0	0.19	0	0	0	0	0	0	0	0	0	0	0	0	0	0	0	0	0	0	0	0	0	0	0	0	0	0	0	0	0	0	0	0	0	0	0.81
Peak_1378	1	67952601	67952691	-	ENSBTAG00000023607	High	OK	OK	13.57	9.46	10.08	31.72	11.76	40.85	73.28	7.28	1.6	4.64	32.47	45.56	34.3	7.13	6.24	2.16	5.46	8.82	12.25	1.96	15.18	15.84	8.91	12.42	16.1	25.2	9.4	16.38	13.2	15.48	2.25	6.29	7.29	4.07	3.48	5.27	5.46	5.33	4.18	2.8	9.99
Peak_1379	1	67952751	67952827	+			OK	OK	0.23	0	0	0	0	0	0.32	0	0	0	0	0	0	0.46	1.3	0	0.65	0.21	0	0	0	1.44	2.97	1.44	0.6	0	0.3	0	0	0.24	0	0	0	0	0	0.68	0	0	0.19	0	0
Peak_1380	1	67979218	67979226	+			OK	OK	0	1.1	0	0.28	0	0	0.32	0	0	0.16	0.17	3.4	0	0.23	0.26	0.54	0.13	0.42	0.25	0.14	0.66	1.08	2.16	0.9	0.4	0.9	0.5	0	0.7	0.36	0.25	0	0.54	0.37	0.29	0.51	0.42	0	0	0	0
Peak_1381	1	67981276	67981385	-			OK	OK	1.15	0	2.94	0.08	0	0	0.16	22.82	20.48	8	0	0	0	0	0	0	0	5.46	0	3.5	9.68	0	0	0.18	0	0	6.2	0.26	1.6	1.44	1.75	0.37	0.81	1.48	0	0.17	0	0	0	0	0
Peak_1382	1	67981700	67981795	-			OK	OK	0.23	0.66	3.08	0.04	0	0	0	18.34	14.4	20.48	0	0.68	0	0	0	0	0	4.41	0	3.5	8.8	0	0	0.18	0	0.9	4.2	0.78	1.4	1.44	1	0.37	0.54	1.11	0	0.34	0	0	0.38	0	0
Peak_1383	1	67985721	67985776	-	ENSBTAG00000014567	High	OK	Likely_false	0	0	0.28	0.16	0	0	0.48	3.22	0.96	0.16	0	0	0	0	0	0	0	1.05	0.5	0	0.22	0	0	0	0	0	0	0	0	0	0	0	0	0	0	0	0	0	0	0	0
Peak_1384	1	67986954	67987127	-	ENSBTAG00000014567	High	OK	OK	20.01	39.93	402.08	7.72	6.16	7.41	21.12	4736.62	1610.56	3318.08	67.66	37.4	23.52	0.92	1.56	0	2.34	610.05	242.75	146.72	858.22	0.36	0.81	2.61	0.7	294.75	300.1	143.78	40	241.8	15.75	36.26	291.06	316.35	0.58	13.26	19.74	6.15	5.13	0.6	9.18
Peak_1385	1	67988388	67988410	-	ENSBTAG00000014567	High	OK	Likely_false	0	0	0	0	0	0	0	0	0	0	0	0	0	0	0	0	0	0	0	0	0	0	0	0	0	0	0	0	0	0	0	0	0	0	0	0	0	0	0	0	0
Peak_1386	1	67995837	67995873	-	ENSBTAG00000014567	High	OK	Likely_false	0	0	0	1.4	0.56	1.52	6.24	0	0	0	2.72	3.4	0.49	0	0	0	0	0	0	0	0	0	0	0	0	0	0	0	0	0	0	0	0	0	0	0	0	0	0	0	0
Peak_1387	1	67997839	67997854	-			OK	OK	0	0	0	0.16	0	0	0	2.8	0	12	2.04	1.36	0	0	0	0	0	0	0	0	0.22	0	0	0	0	0	0	1.04	0	0	0	0	0	0	0	0.17	0	0	0	0	0
Peak_1388	1	68003681	68003694	-	ENSBTAG00000014567	High	OK	Likely_false	0	0.11	0	0	0	0	0	1.4	0	0.8	0	0	0	0	0	0	0	0.42	0	0.42	1.32	0	0	0	0	0	0.2	0	0	0	0	0	0	0	0	0	0	0	0	0	0
Peak_1389	1	68005294	68005303	-	ENSBTAG00000014567	Medium	OK	Likely_false	0	0	0.28	0	0.28	0	0	0.28	1.28	1.12	0.34	0	0	0	0	0	0	0.21	0	0.28	0	0	0	0	0	0.45	0.1	0	0	0.12	0	0	0	0	0	0.17	0	0	0	0	0
Peak_1390	1	68023609	68023620	-	ENSBTAG00000014567	Medium	OK	Likely_false	0	0	0.42	0	0.84	0	0	1.26	0	0.8	0	0	0	0	0	0	0	0.42	0	0	0	0	0	0	0	0	0.3	0	0	0	0	0	0	0.37	0	0	0	0	0	0	0
Peak_1391	1	68039365	68039375	-			OK	OK	0	0	0	0.08	0	0	0	0.42	0.32	0.16	1.02	0	0	0	0	0	0	0.21	0	0	0	0	0	0	0	0	0	1.04	0	0	0	0	0	0	0	0	0	0	0	0	0
Peak_1392	1	68059448	68059477	-	ENSBTAG00000014567	High	OK	Likely_false	0.46	0.77	0.84	1.4	0.28	3.99	3.04	2.94	0.32	1.92	2.55	0	0.98	0	0	0	0	0.84	0.5	0.7	0.22	0	0	0	0.1	0	1.3	2.6	0.3	0.24	0	0	2.7	0.74	1.16	0.68	0.84	0.41	0.76	0.6	0
Peak_1393	1	68060141	68060158	-	ENSBTAG00000014567	Medium	OK	Likely_false	0	0	0	0.04	0.28	0	0	0	0.64	0.48	0.34	0	0	0	0	0	0	0.42	0	0	0.22	0	0	0	0	0	0.2	0.52	0	0	0	0	0	0	0	0	0	0	0	0	0
Peak_1394	1	68065927	68065952	+			OK	OK	0	0	0	0	0	0	0	0.42	0	0.32	0	0	0	0	0	0	0	0.42	0	0	0	0	0	0	0	0	0	0	0	0	0	0	0	0	0	0	0	0	0	0	0
Peak_1395	1	68066915	68066927	-	ENSBTAG00000014567	High	OK	Likely_false	0	0	0.14	0.04	0.28	0	0	1.4	3.84	0.16	0	0	0	0	0	0	0	0	0	0.7	0.22	0	0	0	0	0	0	0	0	0.48	0	0	0	0	0	0	0	0	0	0	0
Peak_1396	1	68068427	68068685	-	ENSBTAG00000014567	High	OK	Likely_false	3.68	7.04	32.48	5.88	1.68	3.42	18.4	386.26	147.52	321.92	38.42	16.32	27.93	4.6	0.78	1.62	2.73	49.56	23	36.4	121	5.04	1.62	6.3	2.2	29.7	37	21.06	4.4	38.4	2.25	0.37	74.79	43.29	2.32	7.82	2.94	6.15	8.74	0.6	1.35
Peak_1397	1	68080126	68080138	-			OK	OK	0	0	0	0	0	0	0	0.56	0	0	0	0	0	0.23	0	0	0	0	0.25	0	0	0	0.81	0.09	0	0	0	0	0	0	0	0	0	0	0	0	0.42	0	0	0.2	0.27
Peak_1398	1	68163001	68163015	+			OK	OK	0	0	0	0	0	0	0	0	0	0	0	0	0	0	0	0	0	0	0	0	0	0	0	0	0	0	0	0	0	0	0	0	0	0	0	0	0	0	0	0	0
Peak_1399	1	68177214	68177338	-	ENSBTAG00000054441	High	OK	OK	0	0	0.42	5.4	1.96	11.02	11.68	0	0	0	22.61	44.88	16.66	0	0	0	0	1.26	5.5	0.42	7.26	0	0	0	0	3.6	1.9	10.66	0	0	0	0	0	0	0.29	0	0	0.41	0	0	0
Peak_1400	1	68177497	68177509	-	ENSBTAG00000054441	Medium	OK	OK	0	0	0	0	0	0	0	0	0	0	0.34	0	0	0	0	0	0	0	0	0	0	0	0	0	0	0	0	0.26	0	0	0	0	0	0	0	0	0	0	0	0	0
Peak_1401	1	68260015	68260101	-	ENSBTAG00000054441	High	OK	OK	0	0	0.98	0.64	0	0.57	1.44	0.7	0.32	1.12	20.23	10.2	11.27	0.46	0	1.08	0.13	0.21	1.5	0.14	0	0.72	0	0.27	0	0	0.2	1.3	0	0	0	0	0	0	0	0	0	0.41	0	0.2	0
Peak_1402	1	68332269	68332552	-	ENSBTAG00000000566	High	OK	OK	1.15	4.18	2.8	6.72	2.52	8.55	13.28	2.24	7.36	3.84	11.56	1.36	22.54	16.56	12.48	17.82	11.05	6.3	4.25	3.08	7.92	19.44	18.63	20.7	16.5	15.3	8.5	16.64	2.2	6.24	3.75	3.7	7.02	9.62	5.51	4.93	4.62	8.2	9.31	0.8	13.23
Peak_1403	1	68384818	68384936	-	ENSBTAG00000006947	High	OK	OK	0	0	0	0.04	0	0	0	0	0	0	0	0	0	0.46	0.78	1.62	0.52	0	0	0	0	0	0	0.36	0	0	0	0	0	0	0	0	0	0	0	0	0	0	0.19	0	0
Peak_1404	1	68433509	68433615	+			OK	OK	1.15	0.55	0.14	2.44	1.96	1.71	1.6	0.42	0	0.32	6.12	0	1.47	0.23	1.04	0	0.26	0	0.25	0.14	0.22	0	0	0	0.2	0.45	0.1	0.78	0	0.48	0.25	0	0.27	0	0.29	0.68	0	0.41	0.19	0.4	0
Peak_1405	1	68433887	68433955	+	ENSBTAG00000002640	Medium	OK	OK	0	0.22	0.28	2.12	3.08	0.95	0.32	0.14	1.28	1.6	2.38	0	0.98	4.6	1.56	2.16	1.3	0.84	0.75	0	0.22	0	0	0	0	0.9	0.1	0.52	0	0.36	0	0	0	0.37	0	0.51	0.42	0	0	0	0.81
Peak_1406	1	68440362	68440370	-			OK	OK	0	0	0	0	0	0	0	0	0	0	0	0	0	0	0	0	0	0	0	0	0	0	0	0	0	0	0	0	0	0	0	0	0	0	0	0	0	0	0	0	0
Peak_1407	1	68442288	68442302	+			OK	OK	0	0	0	0.52	1.4	0.19	0.8	0	0	0.16	2.38	0	0.98	0	0.26	2.16	0.13	0	0	0	0	0	0	0.09	0	0	0.2	0.26	0	0	0	0	0	0	0	0.34	0	0	0	0	0
Peak_1408	1	68462314	68462344	+			OK	OK	0	0	0	0.04	0.56	0	0.16	0	0	0	1.87	0	0.98	0	0	0	0.52	0	0	0.42	0.22	0	0	0	0	0	0.5	0.52	0	0	0	0	0.54	0	0	0	0	0.82	0	0	0
Peak_1409	1	68464864	68464874	+			OK	OK	0	0	0	0.12	0	0	0.64	0	0	0	0.34	0	0	0.46	0	0.54	0	0.21	0	0	0	0	0	0	0	0	0	0	0	0	0.5	0	0	0	0	0.34	0	0	0.76	0.2	0.81
Peak_1410	1	68466085	68466097	+			OK	OK	0	0.11	0	0.48	0	0	0.16	0	0	0	0.51	0	0.98	0	0	0	0	0	0	0	0	0	0	0	0	0	0	0	0	0	0	0	0	0	0	0	0	0	0.57	0	0
Peak_1411	1	68493460	68493463	+			OK	OK	0	0	0	0.16	0	0	0.48	0	0	0	0	0	0	0	0	0	0	0	0	0	0.44	0	0	0	0	0	0.1	0	0	0	0	0	0.54	0	0	0.51	0	0	0.38	0.2	0
Peak_1412	1	68494381	68494394	+			OK	OK	0	0	0	0	0	0	0	0	0.96	0	0	0	0	0	0	0	0	0	0	0	0	0	0	0	0	0	0.2	0	0	0	0	0	0	0	0	0	0	0	0	0	0
Peak_1413	1	68499912	68500044	+	ENSBTAG00000002640	High	OK	OK	0	0	0	0.4	0.56	0	0.48	0.42	0	0	0.68	0	0	16.1	7.28	25.92	6.37	0	0	0	0	0.36	1.08	0	0.1	0	0.5	0	0	0	0	0	0	0	0	0.34	0	0	0.19	0.4	0.27
Peak_1414	1	68538297	68538313	-			OK	OK	0	0	0	0.88	0	0.19	16.64	0	0	0	0.17	0	0	0	0	0	0	0	0	0	0	0	0	0	0	0	0	0	0	0	0	0	0	0	0	0	0	0	0	0	0
Peak_1415	1	68554061	68554076	+			OK	OK	0.69	0	0	0.08	0	0	0.8	0	1.28	0	0	0	0	0.23	0.52	0	0.13	0	0	0	0.88	0	0	0	0	0	0	0	0	0.12	0.5	0	0	0	0	0.17	0	0	0.76	0	0
Peak_1416	1	68563863	68563880	+			OK	OK	0	0	0	0.36	0	0.76	0.16	0.56	0	0.48	0.17	0.68	0.49	0.46	0.26	1.62	0	0	0	0.28	0	0	0	0	0	0	0.1	0	0	0	0	0	0	0	0	0	0.42	0	0.38	0	0
Peak_1417	1	68565479	68565481	+			OK	OK	0	0	0	0	0	0	0.48	0	0	0.8	0.34	0	0	0	1.3	0	0	0	0	0	0	0	0	0.09	0	0	0	0	0	0	0	0	0	0	0	0	0	0	0.95	0	0
Peak_1418	1	68595739	68595816	+	ENSBTAG00000002640	High	OK	OK	0	0	0	0	0	0	0	0	0	0	0	0	0	0	0	0	0	0	0	0	0	0	0	0	0	0	0	0	0	0	0	0	0	0	0	0	0	0	0	0	0
Peak_1419	1	68624100	68624122	+	ENSBTAG00000002640	High	OK	OK	0	0	0	0	0	0	0	0	0	0	0	0	0	0	0	0	0	0	0	0	0	0	0	0	0	0	0	0	0	0	0	0	0	0	0	0	0	0	0	0	0
Peak_1420	1	68641522	68641533	+	ENSBTAG00000002640	Low	OK	OK	0	0	0	0	0	0	0	0	0	0	0	0	0	0	0	0	0	0	0	0	0	0	0	0	0	0	0	0	0	0	0	0	0	0	0	0	0	0	0	0	0
Peak_1421	1	68796791	68796814	+	ENSBTAG00000002640	High	OK	OK	0	0	0	0	0	0	0	0	0	0	0	0	0	0	0	0	0	0	0	0	0	0.36	1.89	1.62	0.6	0	0	0	0	0	0	0	0	0	0	0	0	0	0	0	0
Peak_1422	1	68796957	68797014	+	ENSBTAG00000002640	High	Low_H3K4me3	OK	0	0	0	0.04	0	0	0	0	0.64	0.16	0	0	0	23.46	28.08	51.84	13.78	0	0	0	0	2.16	0.81	4.05	1.3	0	0	0	0	0	0	0	0	0	0	0.17	0	0	0	0	0
Peak_1423	1	68912132	68912160	+	ENSBTAG00000053238	Medium	OK	OK	0	0	0.14	0	0	0	0	0	0.64	0	0	0	0	0	0	0	0	0.84	0	0	0	0	0.27	0	0	0.45	0.4	2.86	0.1	0	0	0	0	0	0	0	0	0	0	0	0.54
Peak_1423	1	68912132	68912160	+	ENSBTAG00000002640	High	OK	OK	0	0	0.14	0	0	0	0	0	0.64	0	0	0	0	0	0	0	0	0.84	0	0	0	0	0.27	0	0	0.45	0.4	2.86	0.1	0	0	0	0	0	0	0	0	0	0	0	0.54
Peak_1424	1	68925462	68925479	+	ENSBTAG00000053238	High	OK	OK	0	0	0	0	0	0	0	0	0	0	0	0	0	0	0	0	0	0	0	0	0	0	0	0	0	0	0	0	0	0.12	0	0	0	0	0	0	0	0	0	0	0
Peak_1425	1	69003188	69003321	+	ENSBTAG00000053238	High	OK	OK	24.61	37.95	42.14	3.6	8.68	7.41	28.16	41.44	7.04	22.24	23.12	8.16	24.5	4.14	3.38	2.16	2.08	47.04	39.75	3.08	25.08	2.16	0.81	0.72	1.6	29.25	7.3	21.84	3.4	3.48	0.75	3.33	35.37	62.53	19.43	26.18	35.28	44.69	38	0.4	1.08
Peak_1426	1	69022596	69022613	+			OK	OK	0.23	0	0.14	0.2	0	0	0	0	0	0	0	0	0	0	1.3	0	0	0	0	0	0	0	0	0	0	0	0.1	0	0	0	0	0	0	0	0	0	0	0	0	0	0
Peak_1427	1	69023474	69023478	+			OK	OK	0	0	0.14	0.12	0	0	0	0	0	0	0	0	0	0	0	0	0.39	0	0	0	0	0	0	0	0	0	0	0	0	0	0	0	0	0	0	0	0	0	0	0	0
Peak_1428	1	69026120	69026134	+			OK	OK	0	0.11	0	0	0	0	0.16	0.14	0	0	0	0	0	0.69	0	0	0	0.21	0	0	0.66	0	0	0	0	0	0.1	0	0	0	0	0	0	0	0	0	0	0	0	0	0
Peak_1429	1	69048812	69048918	+	ENSBTAG00000053238	High	OK	OK	0	0	0	0	0	0	0	0	0	0	0	0	0	0	0	0	0	0	0	0	0	0	0.27	0	0	0	0	0.52	0.1	0.72	0	0	0	0	0	0	0	0	0	0	0
Peak_1430	1	69127726	69127784	-			OK	OK	2.3	0.77	1.82	3.8	0.56	3.8	8.48	8.12	3.52	7.84	1.87	10.88	2.94	4.6	3.64	1.08	1.69	5.04	3.25	1.4	3.96	2.52	3.51	9.18	4	1.8	3.4	0	0.1	1.08	1	1.48	0.54	1.48	4.35	4.59	7.14	11.07	5.7	3	0.27
Peak_1431	1	69127769	69127865	+	ENSBTAG00000013727	High	OK	OK	16.33	11.99	10.78	14.48	9.8	7.98	15.2	7.42	4.16	8	9.69	12.24	7.84	4.37	3.9	6.48	1.82	13.23	8.75	6.3	18.04	11.16	9.72	9.99	8	9.45	10.1	25.22	9.1	12.36	7	5.18	7.29	8.88	8.12	6.29	7.98	13.53	9.31	4.6	2.16
Peak_1432	1	69143924	69143936	+			OK	OK	0	0	0	0	0	0	0	0	0	0	0.17	0	0	0	0	0	0	0	0	0	0	0	0	0.36	0	0	0	0	0	0	0	0	0	0	0	0	0	0	0.19	0	0
Peak_1433	1	69194701	69194736	-			OK	OK	0	0	0	0	0	0	0	0	0	0	0	1.36	0	0	0	0	0	0	0	0	0	0	0	0	0	0	0	0	0	0	0	0	0	0	0	0	0	0	0	0	0
Peak_1434	1	69201886	69201898	-	ENSBTAG00000013755	Medium	OK	OK	0	0	0.28	0.04	0	0.38	0	0.28	0	0	0.34	0	0	0	0	0	0	0	0	0	0.22	0	0	0	0.3	0	0	0	0	0	0	0	0	0	0	0	0	0	0	0	0
Peak_1435	1	69203303	69203316	-			OK	OK	0	0	0.14	0	0	0	0	0.7	0	0.48	0.51	0	0.98	0	0	0	0	0	0	0	0	0	0	0	0	0	0	0	0	0	0	0	0	1.48	0	0	0	0	0	0	0
Peak_1436	1	69208011	69208029	+			OK	OK	0	0	0	0	0	0	0	0	0	0	0	0	0	0	0	0	0	0	0	0	0	0	0	0	0	0	0	0	0	0	0	0	0	0	0	0	0	0	0	0	0
Peak_1437	1	69221419	69221433	-			OK	OK	0	0	0	0.08	0	0	0	0	0	0	0	0	0	0	0	0	0	0	0	0	0	0	0	0	0	0	0	0	0	0	0.25	0	0	0	0	0	0	0	0	0	0
Peak_1438	1	69283899	69283904	-	ENSBTAG00000013755	High	OK	OK	0	0	0	0	0	0	0	0	0	0	0	0	0	0	0	0	0	0	0	0	0	0	0	0	0.1	0	0	0	0	0	0	0	0	0	0	0	0	0	0	0	0
Peak_1439	1	69312502	69312515	-			OK	OK	0.23	0	0	0.16	0	0	0	0	0	0	0.51	0.68	0	0	0	0	0	0	0	0	0.22	0	0	0	0.1	0	0	0	0	0.12	0	0	0	0.37	0.29	0	0	0	0.38	0	0.27
Peak_1440	1	69331946	69331950	-			OK	OK	0	0	0	0	0	0	0	0	0	0	0	0	0	0	0	0	0	0	0	0.84	0.66	0	0	0	0	0.9	0.7	0	0.2	0	0.5	0	0	0	0	0	0	0	0	0	0
Peak_1441	1	69335427	69335589	-	ENSBTAG00000010382	High	OK	OK	0	0	0	0	0	0	0	0	0	0	0	0	0	0	0	0	0	1.26	2.5	1.68	0.88	0	0	0	0	2.7	2.1	5.98	0.9	0.36	0.5	0.74	0	0	0	0	0	0	0	0	0
Peak_1442	1	69348459	69348473	-	ENSBTAG00000010382	High	OK	OK	0	0	0	0	0	0	0	0	0	0	0	0	0	0	0	0	0	0	0.5	0	0.66	0	0	0	0	1.8	0.4	0.26	1.7	0.36	0.25	0	0	0	0	0	0	0	0	0	0
Peak_1443	1	69352455	69352470	-			OK	OK	0	0	0	0	0	0	0	0	0	0	0	0	0	0	0	0	0	0	0	0.42	0	0	0	0	0	0	0.5	0.26	0.1	0.12	0	0.37	0	0	0	0	0	0	0	0	0
Peak_1444	1	69357396	69357411	-	ENSBTAG00000048794	High	OK	OK	0	0	0	0	0	0	0	0	0	0	0	0	0	0	0	0	0	0.21	0	4.76	39.82	0	0	0	0	0	5.4	17.42	0.4	0.12	3.5	11.47	0	0	0	0	0	0	0	0	0
Peak_1445	1	69418368	69418384	-			OK	OK	0	0	0.14	0	0	0	0	0.14	0	1.44	0	0	0	0	0	0	0	0	0	0	0	0	0.27	0	0	0	0	0	0.1	0	0	0	0.54	0.37	0	0	0	0	0	0.2	0
Peak_1446	1	69420506	69420524	-			OK	OK	0	0	0	0.16	0	0	0.16	0.42	0	0.16	0.34	0.68	0	0	0	0	0	0	0	0	0	0	0	0	0.2	0	0	0	0	0	0	0	0	0	0	0	0	0	0.57	0	0
Peak_1447	1	69432648	69432660	-			OK	OK	0	0	0	0.28	0	0.19	0	0	0	0	0.17	0	0	0.23	0	0	0	0	0	0	0	0	0	0	0.1	0	0	0	0	0	0	0	0	0	0	0	0	0	0.19	0	0
Peak_1448	1	69466284	69466323	-	ENSBTAG00000021396	High	Low_H3K4me3	OK	0	0.11	0	0.6	0.56	0.19	0.64	0.28	1.6	1.28	0.68	0	0.49	0	0	0	0	0	0	0	0	0	0	0.45	0	0	0.2	0.78	0	0	0	0	0.27	0.37	0	0.34	0.42	0.41	1.52	0	1.62
Peak_1449	1	69477960	69477961	-	ENSBTAG00000021396	High	OK	OK	0	0	0	0.68	1.12	0.19	0.32	0.14	0.32	0.16	1.19	0	0	0	0	0	0	0	0	0.14	0.22	0	0	0	0	0	0.5	0.26	0	0.12	0	0	0	0	0	0.85	0	0	0.57	0	0
Peak_1450	1	69484758	69484769	-			OK	OK	0	0.11	0	0	0	0	0	0	0	0	0	0	0	0	0	0	0	0	0	0	0.22	0	0	0	0	0	0	0	0	0	0	0	0	0	0	0	0	0	0	0.2	0
Peak_1451	1	69670288	69670313	-	ENSBTAG00000000496	High	OK	OK	0.23	0.33	0.14	0	0	0	0	0	0	0	0	0	0	0	0.26	0	0	0.21	1.75	0.42	0.88	1.8	0.27	1.8	1.6	4.95	2.8	2.86	0.3	0.12	0.25	0.37	0.54	0	0	0	0	0	0.57	0	0
Peak_1452	1	69700590	69700603	-			OK	OK	0.69	0	0	0.04	0	0.57	0	0	0.32	0	0	0.68	0	0	0	0	0	1.05	0	0	0.44	0	0	0	0.1	0	0.2	0	0	0	0	0	0	0	0	0.34	0	0	0	0.2	0
Peak_1453	1	69726667	69726767	-			OK	OK	0	0.77	0	0.04	0	0	0	0.42	0	0	0.51	0	0	0	0	0	0.52	0	0	0.84	0.66	0	0	0	0	0	0.4	0	0	0.48	0.5	0	0	0	0	0.34	0	0	0	0	0
Peak_1454	1	69729306	69729315	-			OK	OK	0.69	0	0.14	0	0	0	0	0	0	0	0	0	1.47	0	0	0	0	0	0	0	0	0	0	0.09	0.3	0	0.1	0	0	0	0	0	0	0	0	0	0.42	0	0.19	0	0
Peak_1455	1	69729905	69729911	-	ENSBTAG00000050482	Low	OK	OK	0.23	0	0.42	0	0	0	0	0.14	0	0	0	0	0	0	0	0	0.26	0	0	0	0	0	0	0.18	0.3	0	0	0	0	0	0	0	0	0	0	0	0	0.82	0	0	0
Peak_1456	1	69744061	69744078	-	ENSBTAG00000050482	Low	OK	OK	0	0	0	0.04	0	0	0	0	0	0.32	0	0	0	0.46	0	1.08	0	0	0	0	0	0	0	0.09	0.1	0	0	0	0	0	0	0	0.54	0	0	0	0	0	0.38	0.4	0
Peak_1457	1	69772393	69772394	-			OK	OK	0.46	0	0	0	0	0	0	0	0	0	0.17	0.68	0	0	0	0	0.39	0.42	0	0.14	0.44	0	0	0.09	0.1	0	0.4	0	0	0	0	0	0	0	0	0	0	0	0.76	0	0
Peak_1458	1	69796207	69796208	-			OK	OK	0	0	0	0.08	0	0	0	0	0.32	0.16	0.34	0	0	0	0	0	0.13	0	0	0	0	0	0	0.27	0	0	0	0.26	0	0.12	0	0	0	0	0	0	0	0	0	0.2	0
Peak_1459	1	69805409	69805559	-			OK	OK	0	0	0	0.04	1.12	0	0.32	0.14	0	0.16	0.68	0	0	0	0	1.08	0.26	0.42	0	0	1.1	0	0	0	0.4	0	0.2	0	0	0	0	0.74	0	0	0	0.17	0	0	0.57	0	0
Peak_1460	1	69812534	69812666	-	ENSBTAG00000050482	High	OK	OK	0.69	0.11	0.42	2	0.28	1.52	0.96	5.32	2.24	4.64	0.51	2.72	0	1.38	0.26	1.08	0	0.63	0.25	0	0.88	1.8	0	0.63	0.1	3.15	1.6	0	0.5	0.72	0	0	2.97	7.4	7.54	1.87	0.42	1.23	2.85	1	0.54
Peak_1461	1	69813390	69813546	-			OK	OK	0.92	0.11	0.42	0.12	0.56	0.38	0.16	0	0.64	0.32	0.51	0	0.49	0.46	0	1.08	0	1.05	0.25	0.28	0.22	1.08	0	1.53	0.8	0.45	2	1.04	0.2	0.12	0.5	0	0	1.11	0.58	0.51	0	0.41	0.95	0.6	0
Peak_1462	1	69816376	69816392	-			OK	OK	0	0.11	0.28	0	0	0	0	0.28	0	0.32	0.34	0	0	0	0	0	0	0	0	0	0.22	0	0	0	0.1	0	0.4	0.26	0	0.12	0	0	0	0	0	0	0	0	0	0.2	0
Peak_1463	1	69820010	69820013	-			OK	OK	0	0	0	0.04	0	0.57	0	0	0	0	0.17	0	0	0	0	0	0.13	0	0	0.14	0	0	0	0.09	0	0	0.1	0.26	0	0	0	0	0	0	0	0	0	0	0.19	0	0
Peak_1464	1	69821883	69821904	-			OK	OK	0	0.22	0.28	0	0	0	0	0	0.32	0.16	0	0	0	0	0	0	0	0.42	0	0	0.66	0.36	0	0	0.1	0	0.7	0	0	0	0	0	0	0	0	0	0	0	0	0	0
Peak_1465	1	69827238	69827300	-	ENSBTAG00000050482	Medium	OK	OK	0	0	0.28	0.36	0	0.19	0.32	0.56	0.64	0.16	1.36	1.36	0	0.23	0.52	0.54	0.91	0.42	0.25	0.14	0.44	3.6	2.7	0.9	1.7	0	0.7	0.52	0.1	0.48	0	0	0	0	0	0.17	0	0	0.19	0.2	0
Peak_1466	1	69827490	69827633	-	ENSBTAG00000050482	High	OK	OK	11.04	4.62	10.36	7.28	3.36	10.07	8.64	12.6	4.8	11.2	5.44	5.44	9.31	9.2	7.02	12.96	4.81	6.09	7.5	3.5	7.48	18.72	17.82	14.13	16.6	14.85	8.3	16.12	6.2	5.64	1.25	4.07	8.91	4.07	2.9	5.95	7.14	10.66	4.37	5.4	7.56
Peak_1467	1	69827677	69827692	+			OK	OK	0	0	0	0	0	0	0	0	0	0	0.17	0	0	0.69	0	0	0	0.21	0	0	0	0.36	0.27	0.36	0	0	0	0	0	0	0	0	0	0	0	0	0	0	0	0.2	0
Peak_1468	1	69860593	69860616	-			OK	OK	0	0	0	0	0	0	0	0	0	0	0	0	0	0	0	0	0	0	0	0	0	0	0	0	0	0	0	0	0	0	0	0	0	0	0	0	0	0	0	0	0
Peak_1469	1	69946567	69946673	-	ENSBTAG00000011383	High	OK	OK	20.47	27.28	24.5	24.2	5.32	18.24	56.96	30.24	19.2	26.72	40.46	31.96	54.88	28.29	19.76	77.76	41.6	31.5	20.5	12.6	36.52	72.72	56.7	47.7	71.1	28.35	35.7	66.3	21.9	19.8	7.25	2.96	47.52	36.26	34.51	36.04	49.56	56.99	40.09	17.4	23.49
Peak_1470	1	69962190	69962204	-			OK	OK	0	0	0	0	0	0	0	0	0	0	0	0	0	0	0	0	0	0.84	0	0	0	0	0	0	0	0	0	0	1.5	0	0	0	0	0	0	0.51	0	0	0	0	0
Peak_1471	1	70005812	70005837	-			OK	OK	0	0	0	0	0	0	0	0	0	0	0	0	0	0	0	0	0	0	0	0	0	0	0	0	0	0	0	0	0	0	0	0	0	0	0	0	0	0	0	0	0
Peak_1472	1	70052578	70052592	-	ENSBTAG00000006471	Medium	OK	OK	0	0	0	0.04	0	0	0	0	0	0	0.17	0	0	0.23	0	0	0	0	0	0	0	0	0	0.63	0.2	0	0.3	0	0.2	0	0	0	0	0	0	1.02	1.68	0	0.19	0	0.81
Peak_1473	1	70053201	70053214	-	ENSBTAG00000006471	High	OK	OK	0	0	0.28	0.68	0	0.57	1.44	0	0.32	0.16	1.36	0.68	0.98	0.46	0.78	0	0	0	0	0	0.22	0	0.54	0.09	0	3.15	0.7	0.26	0	0	0.25	0.37	0	0	1.45	1.7	0	1.64	1.14	0.2	0
Peak_1474	1	70053383	70053519	-	ENSBTAG00000006471	High	OK	OK	0.92	1.1	0.98	3.52	1.4	1.52	3.2	2.1	0	1.92	13.43	8.84	1.47	3.45	0.26	2.7	1.3	1.47	0.5	0.7	2.2	1.8	2.7	3.33	2.4	0.9	1.1	2.08	0.8	0.84	0.5	0.37	3.51	1.85	2.61	3.4	4.62	4.92	3.42	1.2	1.89
Peak_1475	1	70086226	70086240	-	ENSBTAG00000003383	High	OK	OK	0	0	0.14	0.04	0	0	0.16	0	0	0	0	0	0	0	0	0.54	0	0	0	0	0	0	0	0.18	0	0	0.5	0	0	0	0	0	0	0	0	0	0	0	0	0	0
Peak_1476	1	70172174	70172222	-	ENSBTAG00000044172	High	OK	OK	4.6	1.21	2.52	1.64	1.4	3.23	1.6	4.62	1.28	4.8	1.53	8.84	3.92	3.22	2.34	6.48	3.25	3.15	0.75	1.4	5.28	12.96	5.94	6.39	11.3	4.95	3.9	2.86	2.4	0.96	0.5	2.22	4.32	1.11	0.58	5.1	5.46	6.15	5.51	2.6	6.21
Peak_1477	1	70172247	70172364	+	ENSBTAG00000018025	High	OK	Likely_false	3.91	1.1	1.12	1.72	0	1.33	2.56	0.98	0.32	0.64	1.53	0	0.98	3.68	4.68	1.62	1.69	0.63	3.75	0.14	1.76	2.88	2.43	1.53	2.4	4.95	2.6	2.6	1.3	1.08	0.25	0	3.51	1.48	0	1.53	0.84	0.41	0.57	4.8	5.67
Peak_1478	1	70179453	70179476	-	ENSBTAG00000044172	Low	OK	OK	9.89	4.07	9.38	10.88	1.68	11.4	25.12	5.74	3.52	18.08	3.4	2.04	12.74	7.59	3.9	2.16	5.2	6.72	8	0.7	13.2	4.32	8.91	7.11	19.7	8.55	2.8	20.28	14.3	8.52	1	11.47	14.85	12.21	1.16	8.67	22.26	8.2	5.7	2	3.78
Peak_1478	1	70179453	70179476	-	ENSBTAG00000014208	High	OK	OK	9.89	4.07	9.38	10.88	1.68	11.4	25.12	5.74	3.52	18.08	3.4	2.04	12.74	7.59	3.9	2.16	5.2	6.72	8	0.7	13.2	4.32	8.91	7.11	19.7	8.55	2.8	20.28	14.3	8.52	1	11.47	14.85	12.21	1.16	8.67	22.26	8.2	5.7	2	3.78
Peak_1479	1	70179972	70180166	-	ENSBTAG00000014208	High	OK	OK	119.14	80.63	117.88	124.36	39.76	235.03	146.08	214.2	34.56	262.08	66.98	789.48	229.81	67.16	59.54	127.98	31.98	123.06	179	115.92	183.04	68.04	183.33	152.37	164.3	125.55	247.6	171.08	207.4	110.64	65.5	83.62	274.59	184.26	249.11	65.11	204.96	262.4	55.67	36.2	45.36
Peak_1480	1	70180382	70180457	+	ENSBTAG00000018025	High	OK	OK	0	0.33	0.42	0.16	0	1.33	0.32	0	0.64	0.16	0.68	0	2.45	0.23	0	1.08	0.78	0.21	0	0	0.44	0.36	1.89	1.44	1.1	0.9	0.6	1.3	0.4	0.12	1	0.74	0.54	0	0	0.17	2.1	0.41	0	0.8	0.27
Peak_1481	1	70181202	70181221	-	ENSBTAG00000014208	Medium	OK	OK	0	0	0	0	0	0	0	1.4	0.32	0.8	0	0	0	0	0.52	0	0	0	0	0	0.22	0	0	0	0	0	0.2	0	0	0	0	0	0	0	0	0	0	0	0	0	0
Peak_1482	1	70212373	70212388	+	ENSBTAG00000018025	High	OK	Likely_false	0.46	0.55	0.14	0	0	0	0	0	0	0	0	0	0	0	0	0	0	0	0	0	0	0	0	0	0	0	0	0	0	0	0	0	0	0	0	0	0	0	0	0	0
Peak_1483	1	70229276	70229295	-			OK	OK	0	0.11	0	0	0	0	0	0.28	0	0	0	0	0	0	0	0	0.13	0	0	0	0	0	0	0	0	0	1	0	0.5	0	0	0	0	0	0.29	0	0	0	0	0	0
Peak_1484	1	70229864	70229887	-	ENSBTAG00000032839	High	OK	OK	0	0.55	0.28	0.4	0	0	1.12	0.14	0	0	0	0	0	0.46	1.04	0	0.39	0	0	0	0	0.72	0	0.45	0	0.45	0.2	0	0.1	0.12	0	0	0	3.33	0.87	0.34	0	1.23	0	0	0
Peak_1485	1	70323360	70323382	-			OK	OK	0	0	0	0.04	0	0	0	0.28	0	0	0	0	0	0	0	0	0	0	0	0	0.22	0	0	0	0	0.9	0	0	0.2	0.12	0	0	0	0	0	0	0	0	0	0	0
Peak_1486	1	70329757	70329896	-			OK	OK	0	0	0.7	0	0	0	0	0	0	0	0	0	0	0	0	0	0.13	0	0	0	0	0	0.27	0.09	0.2	0.45	0.2	0	0	0	0.5	0	0	0	0	0.85	0	0	0	0	0
Peak_1487	1	70335187	70335200	-	ENSBTAG00000032839	Medium	OK	OK	0	0	0	0.2	0	0.19	0.32	1.12	0.32	0.32	0	0	0.98	0.46	0.78	0.54	0.78	0	0	0.28	0.66	0	0	0.27	0.6	0	0.9	0.78	0	0.72	0	0	0.27	0	0	0	0	0	0.95	0.8	0
Peak_1488	1	70335423	70335638	-	ENSBTAG00000032839	High	OK	OK	34.96	17.93	52.08	60	14.56	71.82	61.76	75.18	18.24	66.08	54.4	145.52	83.79	51.29	29.38	54.54	23.79	28.14	43.75	17.64	34.54	77.76	63.72	102.42	58.8	53.1	44.9	63.18	18.6	19.56	15	18.87	31.05	28.12	33.06	33.49	52.08	61.5	44.84	41.4	32.94
Peak_1489	1	70342566	70342787	-	ENSBTAG00000014874	High	OK	OK	1.15	1.1	2.1	0.6	0.56	1.14	1.12	1.82	2.88	1.6	0.51	0	0.49	0.23	1.3	0.54	0.26	1.47	0	2.1	1.54	2.52	1.08	0.81	0.8	0	4	2.08	1.3	0.36	2.25	1.85	0.81	3.7	0	3.91	2.94	0.82	6.84	0	0.81
Peak_1490	1	70346266	70346276	-			OK	OK	0	0	0	0	0	0	0	0	0	0	0	0	0	0	0	0	0	0	0	0	0	0.72	0	0.09	0	0	0.2	0	0	0	0	0	0	1.11	0	0	0	0	0.57	0.2	0
Peak_1491	1	70371974	70371987	-	ENSBTAG00000014874	Medium	OK	OK	0	0	0	0	0	0	0	0	0	0	0	0	0	0	1.04	0	0	0	0	0	0	0	0	0	0.1	0	0	0.52	0	0	0	0	0	0	0	0	0	0	0	0	0
Peak_1492	1	70372147	70372226	-	ENSBTAG00000014874	High	OK	OK	0.23	0	0	0.04	0	0.19	0	0	0	0	0.17	0	0	0	0	0	0	0	0	0	0	1.08	0.27	0.54	0.3	0	0	0.26	0	0.24	0	0	0	0	0	0.17	0.42	0	1.33	0	0
Peak_1493	1	70372275	70372281	+	ENSBTAG00000001890	Low	OK	OK	0	0	0	0.08	0	0	0.32	0	0	0	0	0	0	0.46	0	0	0	0	0	0	0	0.72	0	0	0	0	0.1	0	0	0.24	0	0	0	0	0.29	0	0	0	0	0	0
Peak_1494	1	70372457	70372598	-	ENSBTAG00000014874	High	OK	OK	29.44	22.55	23.94	32.52	15.12	47.69	46.4	39.06	10.88	44.16	43.52	74.12	27.44	57.04	39.52	56.7	26.52	23.1	15.25	9.24	37.84	81.72	70.74	80.1	68.5	33.3	20.5	42.38	12.1	17.76	7	12.58	57.51	44.03	88.45	51	102.48	75.85	57.38	22.4	34.29
Peak_1495	1	70372688	70372881	+	ENSBTAG00000001890	High	OK	OK	0.23	0.22	0.28	0	0	0	0	0	0	0	0	0	0	2.07	2.34	1.08	1.56	0.42	0	0	0.22	15.12	11.61	9.9	7.8	0	0.2	0.52	0.1	0.24	0.25	0	0.27	0.74	0	1.36	2.52	2.46	3.04	0.8	0.27
Peak_1496	1	70384459	70384492	-			OK	OK	0	0	0	0.08	0	0	0	0	0	0	0.51	1.36	0	0.23	0	0	0.26	0.21	0	0	0	1.08	1.89	0.72	1.3	0	0	0	0.3	0	0	0	0	0	0	0	0	0	0	0.2	0
Peak_1497	1	70384549	70384768	+	ENSBTAG00000001890	High	OK	OK	8.51	8.14	4.06	3.28	0.84	3.04	7.36	1.82	1.6	3.52	7.65	9.52	12.25	8.97	4.94	11.88	8.84	5.25	3.5	2.52	4.84	33.12	33.21	29.97	19.7	9.45	8	13.78	1.7	6.6	3.5	2.96	3.24	1.48	3.48	2.04	1.68	5.74	2.66	5	11.88
Peak_1498	1	70395721	70395732	+			OK	OK	0	0	0	0	0	0	0.64	0	0	0	0	0	0	0	0	0	0	0	0	0	0	0	0	0	0	0	0	0	0	0.12	0	0	0	0	0	0	0	0	0	0	0
Peak_1499	1	70407266	70407351	+	ENSBTAG00000001890	High	OK	OK	0	0	0	0	0	0	0	0	0	0	0	0	0	0	0	0	0	0	0	0	0	0	0	0	0	0	0	0	0	0	0	0	0	0	0	0	0	0	0	0	0
Peak_1500	1	70418747	70418788	+	ENSBTAG00000001890	High	OK	OK	0	0	0	0	0	0	0	0	0	0	0	0	0	0	0	0	0	0	0	0	0	0	0	0	0	0	0	0	0	0	0	0	0	0	0	0	0	0	0	0	0
Peak_1501	1	70422566	70422577	+			OK	OK	0	0.33	0	0.04	0	0	0	0	0	0	0	0	0.49	0	0	0	0	0	0.25	0	0	1.08	0	0	0.2	0	0	0	0	0	0	0	0	0	0	0	0	0	0	0	0
Peak_1502	1	70425485	70425499	+	ENSBTAG00000001890	Medium	OK	OK	0	0	0	0	0	0	0	0	0	0	0	0	0	0	0	0	0	0	0	0	0	0	0	0	0	0	0	0	0	0	0	0	0	0	0	0	0	0	0	0	0
Peak_1503	1	70434967	70434979	+			OK	OK	0	0	0	0.08	0	0	0	0	0	0	0	0	0	0	0	0	0	0	0	0	0	0	0	0	0.3	0	0	0	0	0	0	0	0	0	0	0	0	0	0	0	8.1
Peak_1504	1	70460146	70460302	+	ENSBTAG00000032819	High	OK	OK	1.15	1.1	0.42	0	0	0	0	0	0	0	0	0	0	0	0	0	0	1.26	3.5	0.84	5.06	0	0	0	0	13.5	4.8	20.28	0.2	2.04	1	0.37	0.27	0	0	0	0	0	0	0	0
Peak_1505	1	70462219	70462269	+	ENSBTAG00000032819	High	OK	OK	0	0	0	0	0	0	0	0	0	0	0	0	0	0	0	0	0	0	0	0	0	0	0	0	0	0	0	0	0	0	0	0	0	0	0	0	0	0	0	0	0
Peak_1506	1	70467364	70467365	+	ENSBTAG00000032819	Medium	OK	OK	0	0	0	0	0	0	0	0	0	0	0	0	0	0	0	0	0	0	0	0	0	0	0	0	0	0	0.2	0	0	0	0	0	0	0	0	0	0	0	0	0	0
Peak_1507	1	70500199	70500212	-	ENSBTAG00000014721	High	OK	OK	0	0	0	0	0	0	0	0	0	0	0	0	0	0	0	0	0	0	0	0	0	0	0	0	0	0	0	0	0	0	0	0	0.27	0	1.45	0	0	0	0	0	0
Peak_1508	1	70510595	70510620	+			OK	OK	0	0	0	0	0	0	0	0	0	0	0	0	0	0	0	0	0	0.42	0	0	0.22	0	0	0	0	0	0	0	0.5	0	0	0	0	0	0	0	0	0	0	0	0
Peak_1509	1	70534602	70534688	-	ENSBTAG00000014721	High	OK	OK	0	0	0	0	0	0	0	0	0	0	0	0	0	0	0	0	0	0	0	0	0	0	0	0.09	0	0	0.1	0	0	0	0	0	0.54	0	0.29	0	0	0	0	0	0
Peak_1510	1	70610097	70610154	-	ENSBTAG00000021364	High	OK	OK	0	0	0	0	0	0	0	0	0	0	0	0	0	0.69	0	0	0	0	0	0	0	0	0	0	0.1	0	0	0	0	0	0	0	8.91	7.77	36.83	0	0	0	0	0	0
Peak_1511	1	70622921	70623001	-	ENSBTAG00000021364	High	OK	OK	1.15	1.21	0.56	1.04	0	0	0.16	0.7	1.6	0.96	5.78	2.04	1.96	22.54	14.56	43.74	11.7	0.42	0	0.7	0.22	9.72	6.75	11.07	8	0	0.8	0.26	0.4	0.36	0	0	11.07	21.09	48.14	5.78	0	2.46	3.42	13.4	22.41
Peak_1512	1	70625914	70625928	-	ENSBTAG00000021364	High	OK	OK	0.23	0	0	0.04	0	0	0	0	0	0	0	0	0.49	5.06	1.04	5.4	1.43	0	0	0	0	3.24	1.89	2.7	1.7	0	0	0	0	0	0	0	0	0	0	0	0	0	0	1	0.27
Peak_1513	1	70628215	70628223	-			OK	OK	0	0.22	0.14	0	0.56	0	0	0	0	0	0.17	0	0	0	0	0	0	0	0.5	0	0	0	0.54	0	0	0	0	0.52	0	0	0	0	0	0	0	0	0	0	0	0	0
Peak_1514	1	70639801	70639803	+			OK	OK	0	0	0	0	0	0.19	0	0	0	0	0.17	0.68	0	0.23	0	0	0	0	1	0	0	0	0	0	0	0	0	0	0	0	0	0	0	0	0	0.51	0	0.41	2.28	0.2	0
Peak_1515	1	70650960	70650969	-			OK	OK	0.23	0	0	0	0	0	0	0	0	0	0	0	0	0.92	0	0	0	0.21	0.25	0	0.66	0.36	0.27	0.45	0.4	0	0	0	0	0	0	0	0	0.74	0	0.34	0	0	0.19	0	0
Peak_1516	1	70651474	70651484	-			OK	OK	0	0	0	0	0	0	0	0	0	0	0	1.36	0	0	0	0	0	0	0	0.42	0	0	0	0	0	0	0	0	0	0	0	0	0	0	0	0	0	0	0	0	0
Peak_1517	1	70674130	70674228	-			OK	OK	0	0	0.7	0	0	0	0	0.7	0	0	0	0	0	0	0	0	0	0	0	0	1.54	0	0	0	0	0	0	0	0	0	0.25	0	0	0	0	0	0	0	0	0	0
Peak_1518	1	70679292	70679331	-	ENSBTAG00000032719	High	OK	Likely_false	0.23	0.11	0.14	0.04	0	0	0.16	0	0	0.32	0	0	0	2.07	0	0.54	0.78	0	0.75	0	0.22	0.36	0	0.81	0.2	0	0	1.3	0	0	0.25	0.37	0	1.48	0	1.36	0.84	0.41	0.57	0.6	0
Peak_1519	1	70679860	70680153	-	ENSBTAG00000032719	High	OK	OK	115.46	70.51	38.5	16.28	18.2	18.81	27.2	16.24	7.36	14.72	18.36	51	25.48	63.25	29.9	89.64	26.26	27.93	47	11.48	27.72	42.84	40.23	42.39	49	47.7	24.6	48.1	15.5	18	10.25	21.83	49.95	81.4	79.46	130.05	168.42	226.73	102.41	36	28.62
Peak_1520	1	70679969	70680244	+			OK	OK	6.9	3.85	2.94	1.2	1.68	0.95	0.8	4.34	0.96	1.44	0.85	7.48	2.94	4.83	4.94	4.32	3.25	5.25	2.75	1.12	3.52	23.76	21.87	22.23	30.3	4.05	3.6	3.9	6.6	3.24	1.25	1.48	1.35	1.85	3.48	13.26	11.34	11.89	11.4	5.6	4.86
Peak_1521	1	70690869	70690889	-			OK	OK	0	0	0	0	0	0	0	0	0	0	0	0.68	0	0	0	0	0.13	0	0	0	0	0	0	0.18	0.3	0	0.1	0	0	0	0	0	0	0	0	0.51	0	0	0.19	0	0
Peak_1522	1	70702124	70702135	-			OK	OK	0	0	0	0.08	0	0	0	0	0	0.16	0	0	0	0	0	0	0	0	0	0	0	0	0.54	0	0	1.8	0	0	0	0	0	0	0	0	0	0	0	0	0	0	0
Peak_1523	1	70713112	70713131	-			OK	OK	0	0	0	0.04	0	0	0.16	0.56	0	0.16	0.85	0	0	0.23	0	0	0	0	0	0	0	0	0	0.36	0.2	2.7	0	1.3	0	0	0	0	0.27	0	0	0	0	0	0	0.2	2.7
Peak_1524	1	70717909	70717927	-			OK	OK	0	0	0	0	0	0	0	0.14	0	0.16	0.17	0	0	0	0	0	0	0	0.5	0	0	0	0	0	0	0	0	0	0	0	0	0	0	0	0	0	0	0	0	0	0
Peak_1525	1	70723822	70723837	-			OK	OK	0	0	0	0	0	0	0	0	0	0	0	0	0	0	0	0	0	0	0	0	0	0	0	0	0.1	0	0	0	0	0	0	0	0	0	0	0.17	0	0	0	0	0
Peak_1526	1	70747983	70748116	+			OK	OK	3.22	0.11	1.4	0	0	0	0	0	0	0	0	0	0	0	0	0	0.13	0	0	0	0	1.08	0.54	0.18	0.2	0	0	0.78	0	0	0	0	1.08	0.37	0	0	0	0	0	0	0
Peak_1527	1	70750419	70750420	-			OK	OK	0	0	0.28	0	0	0	0	0	0	0	0.51	0	0	0	0	0	0	0	0	0	0	0	0	0	0.6	0	0	0	0	0	0	0	0	0	0	0	0	0	0.19	0.4	0
Peak_1528	1	70752532	70752599	-			OK	OK	0	0	0.28	0	0	0	0	0	0	0	0	0	0	0	0	0	0	0	0	0.42	0.22	0	0	0	0	0	1.1	0	0	0	0	0	0	0	0	0.17	0	0	0	0	0
Peak_1529	1	70764569	70764579	-			OK	OK	0	0	0	0	0	0	0	0	0	0	0	0	0	0	0	0	0	0.42	0	0	0	0	0	0	0	0	0.2	0.26	0	0	0	0	0	0	0	0	0	0	0	0	0
Peak_1530	1	70768720	70768747	-			OK	OK	0	0	0	0	0	0	0	0	0.32	0	0	0	0	0	0	0.54	0.13	0	0	0.28	0	0	0	0	0	0	0	0.78	0	0	0	0	0	0	0	0	0	0.41	0.38	0	0
Peak_1531	1	70778072	70778087	-			OK	OK	0	0	0	0	0	0	0	0	0	0	0.17	0	0	0	0.26	0.54	0	0	0	0	0	0.36	0	0	0.2	0	0.1	0.26	0	0	0	0	0	0	0	0	0	0	0	0	0
Peak_1532	1	70778317	70778329	-	ENSBTAG00000032719	Low	OK	Likely_false	0	0.11	0	0	0	1.14	0	0	0	0	0.34	0	0	0	0	0	0	0	0	0	0	0	0	0	0.1	0	0	0	0	0	0.25	0	0	0	0	0	0	0	0	0	0
Peak_1533	1	70794950	70794951	-			OK	OK	0	0	0	0	0	0	0	0	0	0	0	0	0.98	0	0	0	0	0	0.5	0	0	0	0	0	0	0	0	0.52	0	0	0	0	0	0	0	0.17	0	0	0	0	0
Peak_1534	1	70798840	70798862	+			OK	OK	0	0	0	0	0	0	0	0	0	0	0	0	0	0	0	0	0	0	0	0	0	0	0	0.27	0	0	0	0	0	0	0	0	0	0	0	0	0	0	0	0	0
Peak_1535	1	70799416	70799549	-	ENSBTAG00000021515	High	OK	Likely_false	18.86	8.36	10.64	4	1.68	5.32	10.72	4.62	2.88	7.68	4.25	20.4	5.39	16.1	8.06	28.08	7.67	9.66	4.5	5.32	14.52	20.52	17.55	13.14	18.3	12.15	10.3	17.42	2.1	6.72	2	6.29	7.56	1.48	7.54	6.46	10.5	11.48	13.49	7.6	11.07
Peak_1535	1	70799416	70799549	-	ENSBTAG00000032719	High	OK	Likely_false	18.86	8.36	10.64	4	1.68	5.32	10.72	4.62	2.88	7.68	4.25	20.4	5.39	16.1	8.06	28.08	7.67	9.66	4.5	5.32	14.52	20.52	17.55	13.14	18.3	12.15	10.3	17.42	2.1	6.72	2	6.29	7.56	1.48	7.54	6.46	10.5	11.48	13.49	7.6	11.07
Peak_1536	1	70802125	70802158	-	ENSBTAG00000021515	High	OK	OK	0	0	0	0.08	0	0	0	0	0	0	0	0	0	0	0	0	0	0	0	0	0	0	0	0	0	0	0	0	0	0	0	0	0	0	0	0	0	0	0	0	0
Peak_1537	1	70802238	70802275	+			OK	OK	0	0	0	0	0	0	0	0	0	0	0	0	0	0	0	0	0	0	0	0	0	0	0	0	0	0	0	0	0	0	0	0	0	0	0	0	0	0	0	0	0
Peak_1538	1	70809627	70809710	+	ENSBTAG00000012347	High	OK	OK	0	0	0	0	0	0	0	0	0.32	0	0	0	0	0	0	0	0	6.3	27	1.96	21.34	0	0	0	0	36.9	4.3	46.28	13.6	9.24	4.5	8.14	0	0	0	0	0	0	0	0	0
Peak_1539	1	70829642	70829658	-			OK	OK	0	0	0	0.04	0	0	0	0.42	0	0.32	0.34	0	0	0	0	0	0	0	0.25	0	0	0	0	0.09	0.3	0	0	0	0	0	0	0	0	0	0	0.51	0	0	0.19	0	0
Peak_1540	1	70830503	70830551	-			OK	OK	0	0	0	0.16	0	0.95	0	0.14	0.32	0	0	1.36	0	0	0	0	0	0.21	0	0.14	0	0	0	0	0.1	0.9	0	0.52	0	0	0	0	0	0	0	0.34	0.42	0.41	0.19	0	0
Peak_1541	1	70877202	70877203	+			OK	OK	0	0	0	0	0	0	0	0	0	0	0	0	0	0	0	0	0	0	0	0	0	0	0	0	0	0	0	0	0	0	0	0	0	0	0	0	0	0	0	0	0
Peak_1542	1	70877332	70877451	-	ENSBTAG00000016979	High	OK	OK	14.49	5.61	6.86	16.4	7.56	18.81	30.08	14.14	4.48	16.64	28.39	49.64	16.66	20.01	11.18	22.14	9.75	14.28	12	9.1	16.06	19.8	18.09	30.06	22	19.35	15.1	29.38	6	5.64	6.25	9.25	12.15	12.95	14.79	11.05	21.42	26.24	15.2	12.4	15.66
Peak_1543	1	70877455	70877521	+			OK	OK	0	0.22	0.14	0	0	0	0.16	0	0	0	0	0	0	1.15	2.86	0.54	0.39	0	0	0.14	0	1.08	1.35	1.26	1	0	0	0	0.1	0	0	0	0	0	0	0.17	0	0	0.19	0.2	0
Peak_1544	1	70877869	70877932	-	ENSBTAG00000016979	High	OK	OK	0	0.22	0.14	0.4	0	0	0.32	0	0	0	1.02	0	0	0.23	0	2.16	0.26	0.21	0	0	0.44	1.08	2.43	1.35	1.1	0	0	0	0	0.12	0	0	0	0	0	0.17	0.42	0	0	0	0.81
Peak_1545	1	70886900	70886968	+			OK	OK	0	0	0	0	0	0	0	0	0	0	0	0	0	0	0	0	0	0	0	0	0	0	0	0	0	0	0	0	0	0	0	0	0	0	0	0	0	0	0	0	0
Peak_1546	1	70908941	70908992	-	ENSBTAG00000032684	High	OK	OK	0.92	0.44	0	0.6	0	1.33	1.12	0.28	0	0	0.68	2.04	1.96	0.23	0	0.54	0	0.42	0	0	0.44	0	0	0.45	0.4	1.35	0.1	0	0.1	0.12	0	0	0.54	0	0.29	0.51	2.94	6.15	0.76	0.2	0.27
Peak_1547	1	70909075	70909105	+			OK	OK	0	0.11	0	0.04	0	0	0	0	0	0	0	0	0.98	0	0	0.54	0	0.42	0.5	0	0	0.36	0	0.18	0.1	0	0	0	0	0	0.25	0	0	0	0	0	0	0	0.38	0	0
Peak_1548	1	70909359	70909524	-	ENSBTAG00000032684	High	OK	OK	7.13	5.28	2.38	3.08	0.28	3.99	8.48	6.86	2.56	4.96	2.21	4.76	3.92	32.89	13.78	18.36	9.1	3.99	7	0.98	4.62	21.24	35.1	25.2	34.1	6.75	4.1	3.64	3.1	4.08	0.75	3.33	6.21	2.96	4.06	10.03	25.62	16.81	7.41	6.6	2.97
Peak_1549	1	70922649	70922656	-	ENSBTAG00000032684	Low	OK	OK	0	0	0	0	0	0.38	0	0	0	0	0.34	0.68	0.49	0	0	0	0	0	0.75	0	0	0	0	0	0	0.45	0	0	0	0	0	0	0	0	0	0	0	0	0	0	0
Peak_1549	1	70922649	70922656	-	ENSBTAG00000040161	Low	OK	OK	0	0	0	0	0	0.38	0	0	0	0	0.34	0.68	0.49	0	0	0	0	0	0.75	0	0	0	0	0	0	0.45	0	0	0	0	0	0	0	0	0	0	0	0	0	0	0
Peak_1550	1	70928343	70928360	-			OK	OK	0	0.22	0.14	0.04	0.56	0	0.16	0	0	0.16	0.34	0	0	0	0	0	0	0	0	0.14	0	0	0	0.18	0	0	0.2	0	0	0	0	0	0	0	0	0.17	0	0	0	0	0
Peak_1551	1	70933013	70933026	-			OK	OK	0	0.11	0.42	0	1.68	0	0	0	0.32	0	0	0	0.49	0	0	0	0	0	0	0.28	0.22	0	0	0	0	0.45	0.4	0	0.3	0	0	0.37	0	0	0	0.17	0	0	0.19	0	0
Peak_1552	1	70934575	70934582	-			OK	OK	0.46	0	0.56	0	0.28	0	0	0.28	0.96	0	0	0	0	0	0	0	0	0	0	0	0	0.36	0	0.45	0.2	0	0.1	0.52	0	0.12	0	0	0	0	0	0	0	0	0	0	0
Peak_1553	1	70964003	70964004	-			OK	OK	0	0	0	0	0	0	0	0	0	0	0	0	0	0	0	0	0	0	0	0	0	0	0	0	0	0	0	0	0	0	0	0	0	0	0	2.55	0	0	3.8	0	0
Peak_1554	1	70964131	70964154	-			OK	OK	0	0	0	0	0	0	0	0	0	0	0	0	0	0	0	0	0	0	0	0	0	0	0	0	0	0	0.1	0	0	0	0	0	0	1.48	0	0.17	0	0	0	0	0
Peak_1555	1	70966723	70966742	-			OK	OK	0	0.11	0	0.04	0	0	0	0	0	0	0	0	0	0	0	0	0.13	0	0	0	0	0	0	0	0.1	0	0.4	0	0.1	0	0.5	0	0.27	0	0	0	0	0	0	0	0
Peak_1556	1	70986775	70986782	+			OK	OK	0	0	0	0	0	0	0	0	0	0	0	0	0	0.23	0	0	0	0	0	0	0	0.36	0.54	0	0	0	0	0	0	0	0	0	0	0	0	0	0	0	0	0	0.27
Peak_1557	1	70987064	70987087	+			OK	OK	0	0	0	0.12	0	0	0	0	0.96	0	0	0	0.49	0.69	0	0	0	0.42	0	0	0	0	0	0.54	0	0	0.2	0	0	0	0	0	0	0	0	0	0	0.41	0	0.2	0.27
Peak_1558	1	70987358	70987484	-	ENSBTAG00000007577	High	OK	OK	35.42	37.84	41.16	64.72	13.16	76.95	63.84	91.28	19.52	85.44	49.81	123.08	67.13	91.77	68.9	48.6	29.12	62.37	46.75	19.6	57.64	202.32	149.58	171.45	174	40.05	68.8	44.72	20.7	18.6	16	14.8	46.17	48.1	44.08	55.42	36.12	49.61	45.03	36.4	55.62
Peak_1559	1	70987522	70987582	+			OK	OK	0.23	0.44	0.14	0.04	0	0.19	0.64	0.14	0	0.32	0.51	0.68	0	4.14	0	0.54	2.99	0.21	0	0	0.44	1.8	4.32	0.9	2.1	0	0.1	0	0	0	0	1.11	0	0	1.45	0.68	1.26	0	1.14	1	2.43
Peak_1560	1	71021483	71021592	-	ENSBTAG00000013317	High	OK	OK	0	0	0.14	0.08	1.4	0	0.16	0.14	1.28	0.64	0	0.68	0	0.69	5.46	1.08	0.13	0	0	0	0.44	0	0.54	0.81	0.6	1.35	0.5	1.04	0	0.36	0.5	3.33	0	0	0	0	0.84	0.82	0.57	0	0
Peak_1561	1	71043948	71044106	-	ENSBTAG00000013317	High	OK	OK	9.2	7.92	7.56	5.8	2.24	8.55	17.28	7	6.08	9.92	10.2	21.76	12.74	14.26	7.54	9.72	8.32	7.56	14.75	4.2	11.22	25.56	26.46	32.13	26.7	15.75	10.9	21.84	6.3	7.08	3.75	6.29	8.1	5.18	5.8	4.42	12.18	4.92	6.27	5.8	7.83
Peak_1562	1	71044146	71044276	+			OK	OK	0	0.22	0	0.4	0	0	0.8	0.28	0	0.32	0	2.04	1.47	2.76	3.38	2.16	0.78	0	0.5	0	1.32	8.64	6.21	5.13	3.5	0	0.7	0	0.7	0.48	0.25	0	0.27	0	0.29	0.51	1.26	0	0	0.4	0.27
Peak_1563	1	71052569	71052641	-	ENSBTAG00000013317	High	OK	OK	0	0	0	0	0	0	0	0	0	0	0	0	0	0	0	0	0	0	0	0	0	0	0	0	0	0	0	0	0	0	0	0	12.69	9.62	4.06	16.15	16.38	39.77	13.3	0	0
Peak_1563	1	71052569	71052641	-	ENSBTAG00000013319	High	OK	OK	0	0	0	0	0	0	0	0	0	0	0	0	0	0	0	0	0	0	0	0	0	0	0	0	0	0	0	0	0	0	0	0	12.69	9.62	4.06	16.15	16.38	39.77	13.3	0	0
Peak_1564	1	71092842	71092856	-	ENSBTAG00000014660	Medium	OK	OK	0.23	0.11	0.7	0.08	0	0	0	0.56	0.32	0.16	0	0	0	0	0	0	0.13	0.42	0	0	0	0.36	0	0.09	0.2	0.45	0	0	0	0	0	0	0	0	0	0.17	0	0	0	0	0
Peak_1565	1	71100665	71100741	-	ENSBTAG00000014660	High	OK	OK	11.5	9.68	4.62	10.56	5.04	7.98	19.2	18.48	3.84	14.72	10.54	20.4	13.23	14.72	8.58	11.34	4.81	9.24	9.25	3.5	10.56	24.84	24.03	19.8	19.6	10.8	9.3	16.12	6.7	4.92	2.25	3.7	10.26	7.4	10.15	8.84	15.54	14.35	8.36	5.8	11.34
Peak_1566	1	71100769	71100826	+	ENSBTAG00000006388	Medium	OK	OK	0	0	0	0.24	0	0	0.32	0.28	0.32	0	0.51	0	0	1.15	0	0	1.17	0	0	0	0	0.36	2.97	1.8	0.6	0	0	0	0	0.48	0	0.37	0.54	0.37	0	0.34	0	0	0.38	0.4	0.54
Peak_1567	1	71101891	71101953	-			OK	OK	0	0	0	0.08	0	0	0	0	0	0	0	0	0	0	0	0	0	0	0	0	0	4.32	4.32	6.12	4.1	0	0.2	0	0	0	0	0	0	0	0	0	0	0	0	0	0
Peak_1568	1	71147052	71147056	+			OK	OK	0	0	0	0	0	0	0	0	0	0	0	0	0	0	0	0	0	0	0	0	0	0	0	0	0	0	0	0	0	0.12	0	0	0	0	0	0	0	0	0	0	0
Peak_1569	1	71155739	71155916	+	ENSBTAG00000049165	High	OK	OK	0.69	0.22	0.14	7.72	8.12	1.71	9.12	2.52	0.64	2.72	5.27	8.16	5.39	1.15	0	3.78	0.13	1.26	0.25	0.56	0.88	2.52	2.16	6.03	5.8	0.9	1.1	1.82	0.2	0.84	0.5	0.74	2.43	0.74	0.87	1.7	0	3.28	0.38	1.2	0
Peak_1569	1	71155739	71155916	+	ENSBTAG00000009614	High	OK	OK	0.69	0.22	0.14	7.72	8.12	1.71	9.12	2.52	0.64	2.72	5.27	8.16	5.39	1.15	0	3.78	0.13	1.26	0.25	0.56	0.88	2.52	2.16	6.03	5.8	0.9	1.1	1.82	0.2	0.84	0.5	0.74	2.43	0.74	0.87	1.7	0	3.28	0.38	1.2	0
Peak_1569	1	71155739	71155916	+	ENSBTAG00000048195	High	OK	OK	0.69	0.22	0.14	7.72	8.12	1.71	9.12	2.52	0.64	2.72	5.27	8.16	5.39	1.15	0	3.78	0.13	1.26	0.25	0.56	0.88	2.52	2.16	6.03	5.8	0.9	1.1	1.82	0.2	0.84	0.5	0.74	2.43	0.74	0.87	1.7	0	3.28	0.38	1.2	0
Peak_1570	1	71159880	71159881	+			OK	OK	0	0	0	0.12	0	0	0	0.14	0	0	0.34	0	0	0	0	0	0	0	0	0	0	0	0	0.18	0.2	0	0	0	0	0	0	0	0	0	0	0	0	0	0	0	0
Peak_1571	1	71166852	71166982	+			OK	OK	0	0	0	0.64	0	0	0	0	0	0	0	0	0	0	0	0	0	0	2	0.14	0	0	0	0	0	0	0.1	0.78	0	0	0	0	0	0	0	0	0	0	0.38	0	0
Peak_1572	1	71175283	71175290	+	ENSBTAG00000009614	Medium	OK	OK	0	0	0	0	0	0	0	0	0	0	0	0	0	0	0	0	0	0	1.5	0	0	0	0	0	0	0	0.1	0	0	0	0	0	0	0	0	0	0	0	0	0	0
Peak_1573	1	71213912	71214033	-			OK	OK	0	0	0	0	0	0	0	0	0	0	0	0	0	0	0	0	0	0	0	0	0.22	0	0	0	0	0.45	0.2	0	0	0	0	0	0.81	0	0	0	0	0	0	0	0
Peak_1574	1	71227497	71227513	-			OK	OK	0	0	0	0	0	0.19	0	0.28	0.32	0	0	0	0	0	0	0	0	0.42	0	0	0	0	0	0	0.2	0	0	0	0	0	0	0	0	0	0	0	0	0	0.57	0	0
Peak_1575	1	71228663	71228767	-	ENSBTAG00000013192	High	OK	OK	11.5	3.41	7.14	12.16	1.68	17.86	16.96	16.38	3.2	12.8	5.27	31.28	10.78	65.55	31.2	44.28	23.66	12.39	5.25	1.68	7.04	61.2	34.83	47.07	79.3	4.95	4	5.2	4.4	3.48	0.75	3.33	29.16	5.18	13.05	28.05	33.6	25.42	15.77	12	7.83
Peak_1576	1	71228755	71228919	+	ENSBTAG00000048195	High	OK	OK	5.75	8.58	11.06	8.96	3.08	12.16	10.88	6.58	1.6	6.72	5.1	29.24	12.25	14.03	8.84	12.42	4.29	18.48	23.25	9.52	24.2	10.08	11.88	13.59	14.6	32.85	21.5	27.3	5.9	12.96	4.5	16.28	2.97	5.55	4.35	4.08	7.14	5.33	4.56	7.6	7.02
Peak_1576	1	71228755	71228919	+	ENSBTAG00000049165	High	OK	OK	5.75	8.58	11.06	8.96	3.08	12.16	10.88	6.58	1.6	6.72	5.1	29.24	12.25	14.03	8.84	12.42	4.29	18.48	23.25	9.52	24.2	10.08	11.88	13.59	14.6	32.85	21.5	27.3	5.9	12.96	4.5	16.28	2.97	5.55	4.35	4.08	7.14	5.33	4.56	7.6	7.02
Peak_1577	1	71229050	71229109	-	ENSBTAG00000013192	High	OK	OK	0	0.11	0	0.44	0	0	0.32	0	0	0	0	0	0	0.23	0	1.62	0.13	0	0	0.56	0	0	0	0.09	0.4	0.45	0.2	0	0	0.12	0	0	0	0	0	0	0	0	0.19	0	0
Peak_1578	1	71257526	71257886	+	ENSBTAG00000047856	High	OK	OK	41.63	13.75	20.86	30.48	10.08	52.25	65.92	41.72	7.68	38.88	33.32	53.72	30.38	26.68	16.12	20.52	11.57	27.09	19	6.72	29.7	44.28	47.79	55.8	44.6	32.4	14.6	28.08	16.2	14.52	3	8.51	28.62	21.46	22.62	29.07	21.84	19.68	31.16	15.2	28.62
Peak_1579	1	71265072	71265109	+			OK	OK	0.23	0.11	1.12	0	0	0	0	0.42	0	0.16	0	0	0	0	0	0	0	0	0	0	0.66	0	0	0	0.2	0	0.3	0	0	0	0.25	0	0	0	0	0	0	0	0	0	0
Peak_1580	1	71281626	71281646	+			OK	OK	0	0	0.28	0	0	0	0	0.14	0.32	0	0	0	0	0	0	0	0	0	0	0.14	0.88	0	0	0	0.1	0	0.5	0	0.6	0.36	0	1.48	0	0	0	0.17	0	0	0	0	0
Peak_1581	1	71282570	71282574	+			OK	OK	0	0	0	0.04	0	0	0	0	0.64	0	0	0	0	0	0	0.54	0	0.21	0.5	0	0	0	0	0	0.7	0	0	0	0	0	0	0	0	0	0	0	0	0	0.19	0	0
Peak_1582	1	71289064	71289081	+			OK	OK	0.46	0.55	0	0.04	0	0.19	0	0.14	0.32	0.48	0	0	0	0.23	0	0	0	0.42	0	0	0	0.36	0	0	0.4	0	0.1	0.52	0	0	0.25	0	0	0	0	0	0	0	0	0	0
Peak_1583	1	71314214	71314309	+			OK	OK	0.69	0	0.28	0.12	0	0	0	0	0.64	0	0	0	0	0	0	0	0	0	0.5	0.42	0	0.36	0	0	0.5	0.45	0.9	0.26	0	0.12	0.75	0	0	0	0	0	0	0.41	0	0.2	0
Peak_1584	1	71342770	71342793	+	ENSBTAG00000047856	High	Low_H3K4me3	OK	1.15	0.11	0	0	0	0	0.16	0	0.32	0.16	0	0	0	0	0	0	0.39	0	0	0	0	0	0.54	0.45	0.1	0	0.2	0	0.2	0	0	0	0	0	0	0.34	0	0	0	0.2	0
Peak_1585	1	71355772	71355920	+	ENSBTAG00000032674	High	OK	OK	10.81	3.85	6.02	7.68	2.24	11.4	13.76	12.04	5.76	21.12	13.77	20.4	16.17	23.92	18.46	36.18	13.65	10.08	10	8.96	8.58	35.64	31.05	43.65	39.1	7.65	14.5	22.36	3.4	4.44	5	5.18	7.02	9.62	7.83	6.12	7.14	3.28	8.93	10.6	14.58
Peak_1586	1	71410423	71410632	-	ENSBTAG00000008873	High	OK	OK	28.52	12.1	19.74	24.08	10.08	25.27	34.24	25.62	6.72	37.6	24.31	49.64	34.79	40.25	14.3	34.56	18.72	36.33	27.25	11.9	33.88	42.84	29.97	45.72	48.1	18	24.6	31.46	19.1	14.64	6.75	21.83	29.43	19.61	29	51.17	57.54	36.9	32.49	7.6	13.5
Peak_1587	1	71410647	71410820	+	ENSBTAG00000048390	High	OK	OK	26.68	23.98	17.22	37.72	15.68	22.61	41.12	6.58	12.16	7.84	19.89	10.88	40.67	46.46	32.5	34.02	22.75	32.13	12.25	8.26	33.44	60.84	73.71	48.51	67	37.35	25.3	42.9	17.3	21.24	8	3.33	41.04	22.94	33.93	28.22	49.14	36.49	27.55	8.2	12.96
Peak_1588	1	71438409	71438455	-	ENSBTAG00000011659	High	OK	OK	0.23	0	0	1.16	1.68	0	1.76	0.28	0.64	0.8	0.68	4.08	1.96	0.23	0	0.54	0	0	0	0.14	0	0	0	0	0.1	0	0.2	0.26	0.4	1.08	0.25	1.11	1.08	0.37	1.16	0	0	1.23	0.19	0.2	0.27
Peak_1589	1	71440152	71440197	-	ENSBTAG00000011659	High	OK	OK	0	0	0.14	0.36	1.68	0	0.16	0.14	0.32	1.44	0.17	0	0	2.53	4.68	4.86	1.04	0.21	0	0.42	0.22	0.72	1.35	0.9	0.8	0	0.3	0.26	0.8	0.84	0.25	0	0	0	0.58	0.51	0.84	0.41	1.33	1	0
Peak_1590	1	71440617	71440690	-	ENSBTAG00000011659	High	OK	OK	0	0.11	0.14	1.04	0	0.19	1.6	1.12	0.32	0.32	2.38	0	1.47	3.22	1.56	3.24	1.69	0.42	0	0.28	0.44	4.68	1.62	6.93	5	0	0.3	1.04	0	1.2	0	0	0.81	0.37	1.74	0.85	2.1	0.82	2.09	1	3.24
Peak_1591	1	71500617	71500629	-	ENSBTAG00000002998	High	OK	OK	0	0	0	0	0	0	0	0	0	0	0	0	0.49	0	0	0	0	0.21	0	0.14	0	0	0	0	0	0	0	0	0.1	0.36	0	0	0	0	0	0	0	0	0	0	0
Peak_1592	1	71511770	71511772	-			OK	OK	0	0	0	0.04	0	0	0	0.42	0	0.16	0	0	0	0.23	0	0	0	0	0	0.14	0	0	0	0.27	0.2	0	0	0	0	0	0	0	0	0	0	0	0	0	0	0	0
Peak_1593	1	71553700	71553713	-			OK	OK	0	0.11	0	0	0	0	0	0.7	0	0.48	0.17	0	0	0	0	0.54	0	0.63	0	0	0.22	1.44	0	0	0.2	0.9	0.1	1.56	0	0	0	0	0.54	0	0	0	0	1.23	0.38	0	1.08
Peak_1594	1	71556314	71556325	-	ENSBTAG00000020378	Medium	OK	OK	0.69	0	0	0.08	0	0	0	0.14	0.64	0	0	0	0	0.23	0	0	0	0	0	0.14	0	0	0	0	0	0	0.3	0	0.1	0	0	0	0	0	0	0.17	0	0	0.38	0	0
Peak_1595	1	71632270	71632286	-			OK	OK	0	0	0	0	0	0	0	0	0	0.32	0	0	0.49	0	0	0	0	0	0.25	0	1.1	0.72	0	0	0	1.35	0.1	0	0	0	0	0	0.54	0	0	0	0	0	0	0	0
Peak_1596	1	71643006	71643028	-			OK	OK	0.46	0	0	0	0	0	0	0	0	0	0	0	0	0	0	0	0	0	0	0	0	0	0	0	0	0	0.1	0	0	0	0.5	0	0	0	0	0	0	0	0	0	0
Peak_1597	1	71656177	71656185	-			OK	OK	0	0	0.28	0	0	0	0.48	0.14	0.32	0	0	0	0	0.46	0.26	0	0	0.84	0	0	0	0	0	0	0	0	0.2	0.26	0	0.24	0	0	0.27	0	0	1.36	0	0	0.38	0.2	0
Peak_1598	1	71664497	71664508	-			OK	OK	0.69	0	0.14	0.36	0	0.19	0	0.28	0	0.16	0	0	0	0	0	1.08	0.39	0	0	0	0	0.72	0	0.18	0.3	0	0.1	1.82	0	0	0	0	0	0	0	1.19	0	0	0.38	0.2	0
Peak_1599	1	71676422	71676479	-	ENSBTAG00000020378	High	OK	OK	0.46	0.22	0.14	0	0	0	0	0	0	0	0	0	0	49.68	40.3	51.3	18.46	0	0	0	0	2.88	4.05	3.69	5.1	0	0	0	0	0	0	0	1.08	0.37	0.87	0	0	0	0	2.6	1.62
Peak_1600	1	71686883	71686933	-			OK	OK	0	0	0	0.2	0	0	0.32	0	0.32	0.32	0	0	0	0	0	0	0.13	0	1.25	0.14	0.44	0.36	0.27	0.18	0	0	0.2	0.78	0	0.36	0.25	0.37	0.54	0	0	0.17	0	0	0	0	0
Peak_1601	1	71735792	71735802	-	ENSBTAG00000020378	Medium	OK	OK	0	0	0	0	0	0	0	0	0	0	0	0	0	1.15	2.08	2.7	0.26	0	0	0	0	0	0	0.09	0.1	0	0	0	0	0	0	0	0	0	0	0	0	0	0	0	0
Peak_1602	1	71736141	71736171	-	ENSBTAG00000020378	High	OK	OK	0	0	0	0	0	0	0	0	0	0	0	0	0	3.91	5.98	7.02	6.76	0	0	0	0	0	0	0	0.7	0	0	0	0	0	0	0	0	0	0	0	0	0	0	0.2	2.97
Peak_1603	1	71748399	71748415	-			OK	OK	0	0.11	0	0.2	1.12	0.19	0	0	0	0	0	0	0	0	0	0	0	0	0	0.28	0.22	0	0	0	0.1	0	0	0.78	0	0	0	0	0	0	0	0	0	0	0	0.2	0
Peak_1604	1	71773042	71773045	-			OK	OK	0	0	0	0	0	0	0	0	0	0	0	0	0	0	0	0	0	0	0	0	0	0	0	0	0	0	0.1	0	0	0.12	0	0	0	0	0	0	0	0	0	1	1.08
Peak_1605	1	71781472	71781531	-	ENSBTAG00000020378	High	OK	OK	4.14	1.43	2.1	0.76	0.28	0.19	1.44	3.08	0.64	4	1.19	2.04	0	2.99	1.56	0.54	0.39	1.26	1.75	2.52	3.3	0.72	8.37	1.8	1	5.4	4	7.02	1.4	0.96	2	0.37	15.12	11.1	0	1.36	0.84	1.23	0.95	4	4.59
Peak_1606	1	71781758	71781816	-	ENSBTAG00000020378	High	OK	OK	3.68	1.98	1.26	0.92	3.08	0.76	1.28	2.38	0.32	2.72	2.72	1.36	2.94	1.84	1.82	2.7	0.26	3.99	2.5	1.12	2.64	3.96	2.7	1.26	3.2	3.15	1.4	2.86	0.8	1.92	0.25	1.11	2.97	1.48	0.58	2.89	1.26	0.41	2.85	1.8	6.21
Peak_1607	1	71781859	71781906	+			OK	OK	0	0	0	0.08	0	0	0	0	0	0	0	1.36	0	0	0	1.62	0	0.21	0	0	0	0	0	0.36	0.2	0	0.1	0	0	0.24	0	0	0	0	0	0	0.84	0	0	0.4	0
Peak_1608	1	71782150	71782347	-	ENSBTAG00000020378	High	OK	OK	1.15	1.32	1.54	0.64	0	0.57	0.8	0.28	0	0.16	0	0.68	0	0	0	0.54	0	2.31	4.25	0.56	1.98	0	0	0.36	0.2	7.65	1.4	5.46	1.2	0.6	1.5	0.74	10.53	2.96	0	0.85	0	0.41	0.57	0.4	0
Peak_1609	1	71868299	71868321	+	ENSBTAG00000048225	High	OK	OK	1.38	0.88	0.14	0.56	0.28	2.09	2.08	2.8	0.64	0.8	0	2.04	2.45	0.69	0.78	0.54	0.52	2.73	1.75	0.14	0.88	1.8	1.89	1.08	1.5	0.9	0.3	1.04	1	0.6	0	0.37	3.51	0.37	0.29	1.36	1.26	0.41	0.76	0	0.54
Peak_1610	1	71913257	71913297	+			OK	OK	0	0	0	0	0	0	0	0	0	0	0	0	0	0.46	3.38	0.54	0.26	0	0	0	0	0	0.27	1.53	1.5	0	0	0.52	0	0	0	0	0	0	0	0.51	0	0.41	0	0	0
Peak_1611	1	71964969	71965000	-	ENSBTAG00000000448	High	OK	Likely_false	0	0	0.42	0.52	0	0	0	0	0	0	0	0	0	0	0	0	0	0	0	0	1.1	0	0	0	0	0	0.1	0	0	0	0	0	0	0	0	0.34	2.1	0.41	1.33	0.2	0
Peak_1612	1	71999123	71999184	+			OK	OK	0	0	0	0	0	0	0	0	0	0	0	0	0	0	0	0	0	0	0	0	0	0	0	0	0	0	0	0	0	0	0	0	0	0	0	0	0	0	0	0	0
Peak_1613	1	71999243	71999261	-	ENSBTAG00000000448	High	OK	Likely_false	0	0	0	0	0	0	0	0	0	0	0	0	0	0	0	0	0	0	0	0	0	0	0	0	0	0	0	0	0	0	0	0	0	0	0	0	0	0	0	0	0
Peak_1614	1	71999562	71999573	+			OK	OK	0	0	0	1	2.52	0.57	0	0	0	0	0	0	0	0	0.26	0	0.13	0	0	0	0	0	0	0.09	0.2	0	0	0.26	0	0	0	0	0	0	0	0.17	1.26	0.41	0.19	0	0
Peak_1615	1	72000516	72000593	-	ENSBTAG00000000448	High	OK	OK	28.75	11.55	13.44	27.68	27.44	20.52	2.4	0.56	0	0.32	4.42	9.52	2.94	6.44	6.5	10.8	4.42	5.25	15.75	0.42	7.48	6.48	13.5	8.55	7.9	26.55	11.2	37.18	0.3	0.36	0.75	0	17.01	18.87	12.76	65.28	59.64	86.92	81.7	1.4	2.16
Peak_1616	1	72000565	72000774	+			OK	OK	7.36	3.74	4.2	4.52	2.8	6.65	0.96	0	0	0.32	0.85	2.04	1.47	5.52	2.6	3.78	3.12	3.36	4.5	0.42	1.32	0.72	0.54	1.89	2.6	8.55	2.6	3.64	0	0	0	0	4.05	9.99	2.61	17.51	23.1	18.04	13.3	1	0
Peak_1617	1	72007637	72007651	-			OK	OK	0	0	0	0	0	0	0	0	0	0	0	0	0	0	0	0	0	0	0	0	0	0	0	0	0	0	0	0	0	0	0	0	0	0	0	0	0	0	0	0	0
Peak_1618	1	72061687	72061807	-	ENSBTAG00000052232	High	OK	OK	0	0.11	0	0.08	0	0	0.16	0	0	0	0.34	0	0.98	0.92	0	0	0.13	0	0	0	0	0	0.27	0.99	0.2	0	0	0	0	0	0	0	0.81	1.48	0.29	0	0	0	0	0.2	0
Peak_1619	1	72062032	72062346	+	ENSBTAG00000023600	High	OK	OK	74.75	147.51	78.26	150	73.36	97.28	164.32	51.94	52.8	40.8	103.87	99.28	270.97	1063.98	676.26	451.98	392.86	57.33	17.75	18.2	47.74	433.08	1491.48	672.57	530.4	53.1	25	56.16	43.4	97.56	16.25	5.18	171.99	60.31	18.27	8.33	12.6	24.19	10.26	706.8	3764.88
Peak_1620	1	72065484	72065494	+	ENSBTAG00000023600	Medium	OK	OK	0	0	0	0	0	0	0	0	0	0	0	0	0	1.15	0	0	0	0	0	0	0	0	1.08	0	0.1	0	0	0	0	0	0	0	0	0	0	0	0	0	0	0.2	0.54
Peak_1621	1	72065701	72065714	+	ENSBTAG00000023600	High	OK	OK	0	0	0	0.12	0	0	0.16	0	0	0	0	0	0	0.23	0.52	0	0.13	0	0	0	0	0	1.89	0.36	0.2	0	0	0	0	0.36	0	0	0	0	0	0	0	0	0	0.2	3.24
Peak_1622	1	72070251	72070258	+			OK	OK	0	0	0	0	0	0	0	0	0	0	0	0	0	0	0	0	0	0	0	0	0	0	0	0	0	0	0	0	0	0	0	0	0	0	0	0	0	0	0	2.2	0.81
Peak_1623	1	72075964	72075978	+			OK	OK	0	0	0.28	0	1.4	0	0	0	0	0	0.68	0	0	0.69	0.26	2.16	0	0	0	0.14	0	0	3.24	0.45	1.2	0	0	0	0	0.12	0	0	0	0	0	0	0	0	0	1	6.21
Peak_1624	1	72078138	72078139	+			OK	OK	0	0	0	0	0	0	0	0	0	0	0	0	0	0.46	0	0	0	0	0	0	0	0	0.27	0	0	0	0	0	0	0	0	0	0	0	0	0	0	0	0	1.2	2.43
Peak_1625	1	72095201	72095218	+	ENSBTAG00000006724	High	OK	OK	0	0	0	0	0	0	0	0	0	0	0	0	0	0	0	0	0	0	0	0	0	0	0	0	0	0	0.1	0	0	0	0	0	0	0	0	0	0	0	0	0	0
Peak_1626	1	72100060	72100307	+	ENSBTAG00000006724	High	OK	OK	39.79	33.11	15.96	19.52	18.48	52.25	113.6	179.76	41.28	92.48	77.35	145.52	83.3	47.84	42.12	104.76	70.72	76.86	44.5	19.04	91.74	232.56	160.38	73.8	196.8	53.1	65.2	91.26	65.3	24.36	19.25	35.15	257.04	180.56	167.62	108.46	87.78	34.44	99.18	9.2	54.54
Peak_1627	1	72100645	72100669	+	ENSBTAG00000006724	High	OK	OK	0	0	0	0	0	0	0	0	0	0	0	0	0	0	0	0	0.26	0	0	0	0	0	0	0	0	0	0	0	0	0	0	0	0	0	0	0	0	0	0	0	0
Peak_1628	1	72110672	72110683	+	ENSBTAG00000006724	Medium	OK	OK	0	0	0	0	0	0	0	0.14	0	0	0	0	0	0	0	0	0	0	0	0	0	0	0	0	0	0	0.6	0	0	0	0	0	0	0	0	0.51	0	0	0	0	0
Peak_1629	1	72150165	72150388	+	ENSBTAG00000003378	High	OK	OK	42.32	19.91	6.02	49.48	26.04	87.97	57.76	36.4	17.6	38.08	108.29	59.16	72.52	78.2	50.96	70.2	38.35	50.19	44.5	21.56	51.04	163.8	126.9	177.57	151.3	36	56.5	65.26	31.2	26.52	16.75	18.5	65.88	32.93	24.65	26.69	26.46	23.37	22.61	26.2	34.83
Peak_1630	1	72167803	72167882	+			OK	OK	0.92	0	0	0.04	0	0	0	0	1.28	0	0.85	0	0.49	0	0	0	0	0.63	1.5	0.84	0.88	0	0	0.27	0	0	0.3	0.52	0	0	0	0	0	0	0	0.34	0	0.41	0	0	0
Peak_1631	1	72179760	72179766	+			OK	OK	0	0	0	0.44	0	0.38	0	0	0	0.96	0.17	2.04	0	0	0	0	0	0	0	0.14	0	0	0	0.09	0	0	0	0.26	0.1	0	0	0	0	0	0	0	0	0	0	0	0
Peak_1632	1	72224083	72224089	+			OK	OK	0	0	0.42	0.04	0	0.19	0	0	0.64	0	0	0	0	0	0	0	0	1.05	0	0	0	0	0	0.09	0.7	0	0	0	0	0	0	0.37	0	0	0	0	0	0	0.19	0	0
Peak_1633	1	72238099	72238107	+			OK	OK	0	0	0	0	0	0	0.16	0	0	0	0	0	0	0	0	0	0	0.84	0	0	0.44	0	0	0	0	0	0	0	0	0	0	0	0	2.22	0	0.17	0	0	1.52	0	0
Peak_1634	1	72299864	72299879	+	ENSBTAG00000054986	Medium	OK	OK	0.23	0	0.14	0	0	0	0	0	0.32	0	0.51	0	0	0	0	0	0.13	0	0	0.14	0.44	0	0	0.09	0	0	0.1	0	0.6	0	0	0	0	0	0	0	0	0.41	0	0.4	0
Peak_1635	1	72307247	72307260	+	ENSBTAG00000054986	High	Low_H3K4me3	OK	0.23	0	0	0.24	0	0.38	0	0	0.32	0.64	0.68	0	0	1.61	0	1.08	0.13	0	0	0	0	0.36	0	2.52	0.7	0	0.1	0.52	0.1	0	0	0	0	0	0	0	0	0.82	0	0.8	0.54
Peak_1636	1	72308449	72308458	-			OK	OK	0	0	0	0	0.28	0	0	0	0	0	0	0	0	0	0	0	0	0	0.25	0.14	0	0	0	0	0.1	0	0.2	0	0	0.12	0	0	0	0.37	0.58	0.34	0.42	0.41	0	0	0.27
Peak_1637	1	72319142	72319153	+			OK	OK	0	0	0.28	0.12	0	0	0	0	0	0.16	0	0	0	0	0	0	0	0	1.25	0	0	0	0	0	1	0	0.2	0	0	0	0	0	0	0	0	0	0	0	0.38	0	0
Peak_1638	1	72320849	72320863	+			OK	OK	0	0	0	0	0	0	0	0.14	0	0	0	0	0	0	0	0	0	0	0	0	0	0	0	0	0	0	0.5	0	0.6	0	0	0	0	0	0	0	0	0	0	0	0
Peak_1639	1	72321540	72321554	+			OK	OK	0	0	0.7	0	0	0	0	0	0	0	0	0	0	0	0	0	0	0	0	0.28	0.44	0	0	0.09	0	0	0.3	0	1.1	0.12	0	0	0	0	0	0	0	0	0	0	0
Peak_1640	1	72326711	72326746	+	ENSBTAG00000014564	High	OK	OK	0.23	0.55	0	0.76	0	0.76	0.16	1.12	0	1.44	0.51	6.12	0.98	1.15	0.52	0	0.39	0.42	1	0.42	1.1	0.72	0.81	1.08	1.9	0.9	0.5	2.08	0.9	0.24	1	0	0.27	0.74	1.16	0.85	0.42	0	0.19	0.6	0.27
Peak_1641	1	72337367	72337405	+	ENSBTAG00000014564	High	OK	OK	0	0	0	0	0	0	0	0	0	0	0	0	0	0	0	0	0	0	0	0	0	0	0	0	0	0	0	0	0	0	0	0	0	0	0	0	0	0	0	0	0
Peak_1642	1	72339629	72339641	-			OK	OK	0	0	0	0	0	0	0	0	0	0	0	0	0	0	0	0	0	0	0	0	0	0	0	0	0	0.45	0	0	0.6	0.12	0.5	0	0	0	0	0	0	0	0	0	0
Peak_1643	1	72342404	72342419	-			OK	OK	0	0	0	0	0	0	0	0	0	0	0	0	0	0	0	0	0	0	0.25	0	0	0	0	0	0	0	0.3	0.26	0.1	0.12	0	0.74	0	0	0	0	0	0	0	0	0
Peak_1644	1	72354343	72354373	-			OK	OK	0	0	0	0	0	0.38	0	0	0	0	0	0	0	0	0	0	0	0	0	0	0	0	0	0	0	0	0.1	0.52	0.1	0	0	0	0	0	0	0	0	0	0	0	0
Peak_1645	1	72429130	72429145	+			OK	OK	0	0	0	0	0	0	0	0.14	0	0	0	0	0	0	0	0	0	0	0	0	0	0	0	0	0.7	0	0	0	0	0	0	0	0.27	0	0	0	0	0	0.19	0	0
Peak_1646	1	72558773	72558799	-			OK	OK	0	0	0	0	0	0	0	0	0	0	0	0	0	0	0	0	0	0	0	0	0	0	0	0	0	0	0	0	0	0	0	0	0	0	0	0	0	0	0	0	0
Peak_1647	1	72806098	72806113	+			OK	OK	0	0	0	0	0	0	0	0	0	0	0	0	0	0	0	0	0	0	0	0	0	0	0	0	0	0	0	0	0	0	0	0	0	0	0	0	0	0	0	0	0
Peak_1648	1	72863746	72863776	-			OK	OK	1.15	0.99	1.68	9.2	7	17.86	24.96	5.32	0.64	3.36	31.62	38.76	17.15	1.84	0	4.32	1.43	3.57	4	1.68	2.64	11.88	5.94	4.77	7.3	3.6	3.2	3.12	0.9	1.44	1	1.11	32.4	6.66	10.44	8.33	16.8	4.51	12.54	1	1.35
Peak_1649	1	72877178	72877203	+	ENSBTAG00000008461	Medium	OK	OK	0	0	0	0	0	0	0	0	0	0	0	0	0	0	0	0	0.39	0.42	0	0	0	0	0	0.18	0.5	0	0	0	0	0	0	0	0	0.74	0	0	0	0	0.19	0	0
Peak_1650	1	72877389	72877475	+	ENSBTAG00000008461	High	OK	OK	6.67	8.58	4.2	7.08	5.6	10.64	19.36	16.52	4.8	9.44	10.03	20.4	7.35	8.51	7.8	7.56	6.63	12.6	5.25	3.78	12.1	25.2	17.82	18.81	24.1	12.6	10.5	10.14	4.9	5.52	2.25	4.07	10.53	6.66	5.51	4.76	4.2	6.15	2.09	6.2	8.64
Peak_1651	1	72881441	72881453	+			OK	OK	0	0.22	0	0.04	0.56	0	0	0	0.32	0.16	0.51	0	0	0	0	0	0	0	0	0.42	0	1.08	0	1.08	0.3	0	0	1.56	0.1	0	0.5	0	0	0	0	0	0	0	0	0.2	1.35
Peak_1652	1	72899189	72899198	+	ENSBTAG00000008461	Low	OK	OK	0.46	0.11	0.14	0.08	0	0	0	0	0	0.96	0	0	0.49	0	0	0	0.39	0.42	0	0	0	0	0	0	0.1	0	0	0.26	0	0	0	0	0	0	0	0	0	0	0	0	0
Peak_1653	1	72901323	72901338	+	ENSBTAG00000002394	Low	OK	OK	0	0	0	0.2	0	0.38	0	0	0	0	0.85	0.68	0.49	0	0	0	0	0	0	0	0.22	0	0	0.09	0	0	0	0.26	0.1	0.24	0	0	0	0.37	0	0.17	0	0	0	0	0
Peak_1653	1	72901323	72901338	+	ENSBTAG00000008461	Medium	OK	OK	0	0	0	0.2	0	0.38	0	0	0	0	0.85	0.68	0.49	0	0	0	0	0	0	0	0.22	0	0	0.09	0	0	0	0.26	0.1	0.24	0	0	0	0.37	0	0.17	0	0	0	0	0
Peak_1654	1	72908940	72908955	+	ENSBTAG00000002394	Medium	OK	OK	0	0.22	0	0.2	0	0	0.96	0.14	0	0.32	0.34	0	0	0	0	0	0.39	0	0	0	0.22	0	0	0.18	0	0	0.1	0	0	0	0	0	0	0	0	0.17	0	0	0	0	0
Peak_1655	1	72954949	72954957	-			OK	OK	0	0	0	0	0	0	0	0	0	0	0	0	0	0	0	0	0.39	0	0	0	0	0	0	0	0	0	0	0	0	0	0	0	0.27	0	0	0	0	0	0	0.2	0
Peak_1656	1	72955029	72955095	+	ENSBTAG00000002394	Low	OK	OK	0.46	0.11	0.14	0	0	0	0	0	0	0.16	0	0	0.49	1.38	0.52	2.16	1.17	0.21	0	0	0	0	1.35	0.27	0.1	0	0.1	0	0	0	0	0	0	0	0	0	0	0	0	0.2	0.54
Peak_1657	1	72963397	72963420	-			OK	OK	0	0	0	0.44	0.28	3.23	0.96	0	0	0	0	0	0	0	0	0	0	0	0	0	0	0	0	0	0	0	0	0	0	0	0	0	0	0	0.29	0.51	1.26	0	1.9	0	0
Peak_1658	1	73034475	73034491	-			OK	OK	0	0	0	0	0	0	0	0	0	0	0	0	0	0	0	0	0	0	0	0	0	0	0	0	0	0	0	0	0	0	0	0	0	0	0	0	0	0	0	0	0
Peak_1659	1	73047986	73048035	-			OK	OK	0	0.44	0.14	0.36	0	1.71	1.44	0	0	0.64	0.51	1.36	0.49	0	0.26	0.54	0.26	0.84	0.5	0.14	0	0.36	5.94	3.42	0.8	0	0.1	0.78	0	0.12	0	0	0.27	0	0	2.89	2.52	4.51	1.14	0.8	0
Peak_1660	1	73048117	73048159	+	ENSBTAG00000013204	High	OK	OK	0.23	0	0.28	0.56	0	0	0.64	0.42	0	0	2.21	0	0.98	0.23	0.52	0	0.39	0.21	0.5	0.98	0.44	0	0	0.54	0	0	0.4	1.3	0.1	0	0	0.37	0.27	0	1.16	0.34	0.84	0.41	0	0	0
Peak_1661	1	73048465	73048568	+	ENSBTAG00000013204	High	OK	OK	0.23	0.22	0	0.64	0.28	0.57	0.48	0.28	0	0.48	1.36	0	0.49	0.69	0	0	0.26	0	0.25	1.26	1.1	0.36	0	0.9	0.3	0	0.3	0	0	0.12	0	0	0.54	0.37	0.29	0.85	0.84	0.82	0	0.2	0
Peak_1662	1	73049470	73049484	-			OK	OK	0	0	0	0.16	0	0.76	0	0	0	0	0	0	0	0	0	0	0	0	0	0	0	0	0	0	0	0	0	0	0	0	0	0	0	0	0	0	0	0	0	0	0
Peak_1663	1	73057297	73057308	+			OK	OK	0	0	0	0.04	0	0	0.32	0	0	0.16	0.17	0	0	0.23	0	1.08	0.52	0	1.25	0	0.22	0	0	0	0	0	0	0.26	0	0	0	0	0	0	0	0	0	0	0	0	0
Peak_1664	1	73058419	73058451	+			OK	OK	0	0.11	0	0	0	0	0	0	0	0	0	0	0	0	0	0	0	0	0	0	0	0	0	0	0	2.7	0	0	0	0.24	0	0	0	0	0	0.17	0	0	0.38	0	0
Peak_1665	1	73063271	73063361	+	ENSBTAG00000013204	High	OK	OK	0.23	0	0.28	1.16	0.56	0.57	2.08	0.28	0.32	0.16	3.57	3.4	1.47	0.69	0.52	2.7	1.3	0	0.75	0	0.44	0	0.81	1.98	0.6	0	0.1	0.26	0	0	0	0	0.54	1.11	1.45	3.57	0.42	4.1	1.52	1.2	1.89
Peak_1666	1	73064842	73064864	+			OK	OK	0	0	0	0.04	0	0	0	0	0.32	0	0	0	0	0	0	0	0	0	0	0	0	0	0	0	0	0	0.2	0	0	0	0	0	0	0	0	0	0	0	0	0	0
Peak_1667	1	73091602	73091617	+			OK	OK	0	0	0.14	0.04	0	0	0.48	0	0	0	0	0	0	0	0	0	0	0	0	0	0	0	0	0	0	0	0	0	0	0	0	0	0	0	0	0	0	0	0	0	0
Peak_1668	1	73092239	73092251	+	ENSBTAG00000013204	Low	OK	OK	0	0	0	0	0	0	0	0	0	0	0	0	0	0	0	0	0	0	0	0	0	0	0	0	0	0	0	0	0	0	0	0	0	0	0	0	0	0	0	0	0
Peak_1669	1	73101886	73101897	+	ENSBTAG00000013204	High	OK	OK	0	0	0.42	0.48	0	1.14	0.64	0	0.32	0	0	0	0	0	0	0.54	0.13	0	1	0	0	0	0	0.45	0.8	0	0	0	0	0	0	0	0.27	0	0	0.17	0	0	0.38	0	0
Peak_1670	1	73105542	73105557	+	ENSBTAG00000013204	Medium	OK	OK	1.15	0.22	0	0.08	0	0	0	0.14	0	0	0	0	0	0	0	0	0	0	0	0	0	0	0	0	0.2	0	0.1	0	0	0	0	0	0	0	0	0	0	0	1.14	0	0
Peak_1671	1	73106734	73106742	+			OK	OK	0	0	0	0.08	0	0.19	0.32	0.14	0	0.32	0.34	0	0	0	0	0	0	0.21	0	0	0	0	0	0.18	0.1	0	0	0.26	0	0	0	0	0	0	0	0.34	0	0	0	0	0
Peak_1672	1	73116094	73116107	+	ENSBTAG00000013204	High	OK	OK	0	0	0.28	0	0.28	0	0	0	0	0	0	0	0	0	0	0	0	0	0	0	0	0	0	0	0.1	0	0	0	0.1	0	0.25	0	0	0	0	0	0	0	0.19	0	0
Peak_1673	1	73117353	73117365	+			OK	OK	0	0	0	0	0	0	0	0	0	0	0	0	0.49	0	0	0	0	0	0	0	0	0	0	0	0	0	0	0	0	0	0	0	0	0	0	0.34	0	0	0.38	0	0
Peak_1674	1	73119554	73119564	+			OK	OK	0	0	0	0.04	0	0	0.32	0	1.28	0	0	0	0	0	0	0	0	0	0	0.14	0	0	0	0	0.1	0	0	0.52	0.1	0	0	0	0	0	0	0	0	0	0	0	0
Peak_1675	1	73124180	73124220	+	ENSBTAG00000013204	High	Low_H3K4me3	OK	0.92	0.88	0.84	0.2	0.28	0.38	1.6	0	0.64	0	0.34	0	0	0	0.78	0	0.52	0	0	0.42	0.44	0	0.54	0.18	0.7	0	0.2	0	0.3	0	0	0	0	0	0	0.34	0	0	1.52	0	0
Peak_1676	1	73124358	73124398	+	ENSBTAG00000013204	High	Low_H3K4me3	OK	0.46	1.32	0.42	0.32	0.28	0	0.64	0	0.96	0.16	0	0.68	0	0.69	0	0	0.78	0.42	0.75	0.84	0	0	0	0.09	0.1	3.15	0.2	0	0.4	0.36	0	0	0	0	0	0	0	0	1.33	0	0
Peak_1677	1	73125885	73126018	+			OK	OK	0.23	0.22	0.98	0.44	0	0.19	1.44	0	2.24	0	0	0	0	0	0	0	0	0.21	0.75	1.26	1.1	0	0	0.09	0.1	0	0.9	0	2.3	0.24	0	0.37	0.81	0	0	0	0	1.23	2.09	0.2	0
Peak_1678	1	73126422	73126595	+			OK	OK	0	0.88	0.14	0.08	0	0.76	0.64	0.42	0.32	0.32	0	0	1.47	0	0.52	0	0	0.63	2.5	0.28	0.22	0.72	0	0.09	0.3	0	1.1	0	0.4	0.36	0	0	0	0	0	0.34	0	0.82	1.71	0	0
Peak_1679	1	73132726	73132781	+	ENSBTAG00000013203	High	OK	OK	0	0	0	0	0	0	0.16	0	0	0	0	0	0	0.46	1.56	0.54	0.13	0	0	0.14	0	0.72	2.7	1.8	2	0	0.1	0	0	0	0	0	0	0	0	0.17	0	0.41	0.57	0	0
Peak_1680	1	73133513	73133539	-			OK	OK	0.23	0	0	0	0	0	0	0	0	0	0	0	0	0	0.26	0	0	0	0	0	0.44	0.72	0	0.54	0.2	0	0	0	0	0	0	0	0	0	0	0.17	0	0.41	0.38	0	0
Peak_1681	1	73134124	73134144	-			OK	OK	0	0	0	0	0	0	0	0	0	0	0	0	0	0	0	0	0	0	0	0	0	0	0	0	0	0	0	0	0	0	0	0	0	0	0	0	0	0	0	0	0
Peak_1682	1	73162583	73162611	+	ENSBTAG00000038600	High	OK	OK	0	0	0	0	0	0	0	0	0	0	8.67	4.08	0	0	0	0	0	0	0	0	0	0	0	0	0	0	0	0	0	0	0	0	0	0	0	0	0	0	0	0	0
Peak_1683	1	73178747	73178848	+	ENSBTAG00000032656	High	OK	OK	0	0	0	4.36	3.36	1.71	0.64	0	0	0	0.34	0	0.49	0	0.52	0	0	0	0	0	0.22	0	0	0.18	0	0.45	0	0	0	0	0	0	0	0	0	7.48	23.52	11.89	20.33	0	0
Peak_1684	1	73215933	73215955	+			OK	OK	0	0	0	0	0	0	0	0	0	0	0	0	0	0	0	0	0	0	0	0	0	0	0	0	0	0	0	0	0	0	0	0	0	0	0	0	0	0	0	0	0
Peak_1685	1	73254081	73254099	+	ENSBTAG00000048497	High	OK	OK	0.23	0	0	0	0	0	0	0	0	0	0	0	0.98	0	0	0	0	0	0	0	0.44	0	0	0	0	0	0	0	0	0	0	0	0	0	0	0	0	0	0	0	0
Peak_1686	1	73267111	73267122	-			OK	OK	0	0	0	0	0	0	0	0	0	0	0	0	0	0	0	0	0	0	0	0	0	0	0	0	0	0	0	0	0	0	0	0	0	0	0	0	0	0	0	0	0
Peak_1687	1	73291542	73291554	+			OK	OK	0	0	0	0	0	0	0	0	0	0	0	0	0	0	0	0	0	0	0	0	0	0	0	0	0	0	0	0	0	0	0	0	0	0	0	0	0	0	0	0	0
Peak_1688	1	73359566	73359574	-			OK	OK	0	0	0	0	0	0	0	0	0	0	0	0	0	0	0	0	0	0	0	0	0	0	0	0	0	0.45	0	0	0.2	0.84	0	0	0	0	0	0	0	0	0	0.2	0
Peak_1689	1	73364239	73364253	+			OK	OK	0	0	0	0.12	0	0	0.16	0	0	0	0	0	0	0	0	0	0	0	0.75	0.28	0.22	0	0	0	0	0	0	0	0	0	0	0	0	0	0	0	0	0	0.19	0	0
Peak_1690	1	73365250	73365371	-	ENSBTAG00000000569	High	OK	OK	210.45	111.21	207.48	135.8	31.92	70.49	60.8	5.74	67.84	2.24	31.79	4.08	79.38	41.63	98.28	54.54	56.29	384.09	96.25	135.38	336.16	88.92	100.98	61.83	90.9	664.2	481.7	471.38	168.8	147.12	107.25	65.86	134.46	317.46	357.28	119.51	153.72	119.31	125.59	29.4	63.72
Peak_1691	1	73375179	73375262	+			OK	OK	0.69	3.96	2.38	0	0	0	0	0	0	0	0	0.68	0	0	0	0	0	4.41	14.5	1.54	6.6	0	0	0	0	40.5	10.2	34.06	7.9	29.04	9.25	12.21	0	0	0	0	0	0	0	0	0
Peak_1692	1	73390744	73390752	+			OK	OK	0	0	0	0	0	0	0	0	0	0	0	0	0	0	0	0	0	0	0	0	0	0	0	0	0	0.9	0	0.26	0	0	0	0	0	0	0	0	0	0	0	0	0
Peak_1693	1	73461319	73461337	-			OK	OK	1.15	0.88	0.84	0	0	0	0	0	0	0	0	0	0	0	0	0	0	1.26	5.75	2.24	1.98	0	0	0	0	4.5	3	5.72	1.3	1.08	0.25	1.85	0	0	0	0	0	0	0	0	0
Peak_1694	1	73542695	73542901	-			OK	OK	0	0	0	0.04	0	0	0	0	0	0.16	0	0	0	0	0	0	0	0.84	0.25	0	0	0.72	0	0.54	0.1	2.7	0.1	1.56	4.7	1.56	1.25	1.11	0	0	0	0	0	0	0.38	0	0.27
Peak_1695	1	73546167	73546184	+			OK	OK	0	0	0	0	0	0	0	0	0	0	0	0	0	0	0	0	0	0	0	0	0	0	0	0	0	0	0	0	0	0	0	0	0	0	0	0	0	0	0	0	0
Peak_1696	1	73584219	73584232	+			OK	OK	0	0.22	0	0	0	0	0	0	0	0	0	0	0	0	0	0	0	0	0	0.14	0	0	0	0	0	0	0	0.52	0.2	0	0	0	0	0	0	0	0	0	0	0	0
Peak_1697	1	73794372	73794446	-	ENSBTAG00000019514	Medium	OK	OK	0	0	0	0	0	0	0	0	0	0	0	0	0	0	0	0	0	0	0	0	0	0	0	0	0	0	0	0	0	0	0	0	0	0	0	0	0	0	0	0	0
Peak_1698	1	73803987	73804002	-			OK	OK	0	0	0	0.08	0	0	0	0.28	0	0	0	0	0	0	0	0	0	0	0	0	0	0.36	0	0.54	0.1	0	0	0	0.2	0	0	0	0	0	0	0	0	0	0	0.4	0
Peak_1699	1	73856321	73856425	-	ENSBTAG00000019514	High	OK	OK	11.96	8.25	9.24	11.96	6.72	8.55	8.16	9.52	3.84	8.8	6.29	16.32	9.8	30.82	15.08	42.66	10.66	8.61	9	4.06	11.66	30.24	20.52	38.07	43.9	9.9	10.9	14.3	3.4	4.92	3.75	7.77	10.8	5.18	14.5	12.41	6.3	19.27	12.73	13.2	6.75
Peak_1700	1	73856547	73856598	+			OK	OK	0	0.11	0	0	0	0	0	0	0	0	0	0.68	0	0.23	0	1.62	0.26	0	0	0	0	0.72	0.81	0.63	0.2	0	0	0	0	0	0	0	0	0	0	0	0.84	0.41	0.19	0.4	0
Peak_1701	1	73893271	73893565	+	ENSBTAG00000016305	High	OK	OK	0	0	0	0	0	0	0	0	0	0	0	0	0	23.46	10.14	46.44	11.83	0	0	0	0	7.2	7.29	11.79	6.2	0	0	0	0	0	0	0	0.27	0.37	0	0	0	0.41	0	33.4	19.98
Peak_1702	1	73970509	73970539	+	ENSBTAG00000016305	High	Low_H3K4me3	OK	0	0.22	0	3.88	1.12	2.09	6.88	0	0	0	0	0	0	0.92	0.26	0	0.26	0	0	0	0	0	0	0	0	0	0	0	0	0	0	0.37	0	0	0.29	0	0	0	0	0	0
Peak_1703	1	74043251	74043274	+	ENSBTAG00000018657	High	OK	OK	0	0	0	0	0	0	0	0	0	0	0	0	0	0	0	0	0	0	0	0	0	0	0	0	0	0	0	0	0	0	0	0	0.54	0	0	0	0	0	0	0	0
Peak_1704	1	74085866	74085891	-			OK	OK	0	0	0	0	0	0	0	0	0	0	0	0	0	0.23	0.26	0	0	0	0	0	0	0	0.81	0.09	0.2	0	0	0	0	0	0	0	0	0	0	0	0	0	0	0	0
Peak_1705	1	74172875	74173010	-			OK	OK	0	0	0	0	0.84	0	0	0	0	0	0	0	0	0.46	0.52	0	0	0	0	0	0	0	0	0.18	0.2	0	0	0	0	0	0	0	0	1.11	0	1.02	0.84	0.82	4.75	0	0
Peak_1706	1	74182627	74182704	-	ENSBTAG00000035844	High	OK	OK	0	0	0	1.08	1.96	0.38	0.8	0.14	0	0	1.53	0	2.45	11.96	7.02	6.48	3.12	0	0	0	0.44	2.16	2.16	3.42	3.7	1.8	0.2	0.26	0.1	0.36	0	0	2.16	1.48	0	1.53	0.42	0	1.9	1	2.43
Peak_1707	1	74182709	74182735	+			OK	OK	0	0.33	0	0	0	0	0.16	0	0	0	0	0	0	1.61	0.26	0.54	0.13	0.42	0	0	0.44	0	1.08	0.45	0.4	0	0.1	0	0	0	0	0	0	0	0	1.02	0.84	1.64	0.95	0	1.08
Peak_1708	1	74183396	74183548	-	ENSBTAG00000035844	High	OK	OK	0	0	0	0.12	0	0	0	0	0	0	0	0	0	0.92	0.78	0.54	1.04	0	0	0.14	0	2.52	0.27	0	0.3	0.9	0	0.52	0	0	0	0	22.68	25.9	33.93	58.48	44.94	99.22	33.44	0.8	0
Peak_1709	1	74488635	74488645	+			OK	OK	0	0	0	0.04	0	0	0	0	0	0.16	0.17	0	0	0.23	0.26	0.54	0	0	0	0	0	0	0	0.27	0	0	0.1	0	0	0	0	0	0	0	0	0.17	0	0	0	0	0
Peak_1710	1	74488974	74489026	+	ENSBTAG00000005430	High	OK	OK	0	0.66	0.28	0.24	0.28	0	0.48	0.14	0	0.8	0.68	3.4	0.98	0	2.08	0.54	0.39	0.21	0	0.14	0.88	1.44	0.81	1.8	1.6	0	0.5	0.52	0.2	0.12	0.5	0.37	1.08	0	0.29	0.17	0.42	0.41	0	1.2	0.81
Peak_1711	1	74489654	74489781	-			OK	OK	0.23	0.44	0.42	0.28	0	0.57	0.16	0	0	0.16	0.51	0	0	0	0	0.54	0.26	0	1	0	0.44	0.36	0	0.27	0.6	0	0.4	0.26	0	0.12	1	0	0	0	0.87	0	0	0	0.19	0	0
Peak_1712	1	74501021	74501046	+			OK	OK	0	0	0.14	0.08	0	0	0	0	0	0.16	0	0	0	0	0	0	0	0	0.75	0	0	0	0	0.18	0.1	0	0	0	0	0	0	0	0	0	0	0	0	0	0	0	0
Peak_1713	1	74510151	74510164	+			OK	OK	0	0	0	0.12	0	0	0	0	0.32	0	0	0	0	0	0	0	0	0	0	0	0	0	0	0.09	0.3	0	0	0	0	0	0	0	0	0	0	0	0	0	0	0	0
Peak_1714	1	74542191	74542212	+	ENSBTAG00000005430	Medium	OK	OK	0	0	0.28	0	0	0	0	0	0	0	0	0	0	0	0	0	0	0	0	0	0	0	0	0	0	0	0	0	0	0	0	0	0	0	0	0	0	0	0	0	0
Peak_1715	1	74557188	74557224	+			OK	OK	0	0.22	0.14	0.08	0	0	0.16	0	0	0.48	0	0	0	0.46	0.26	0	0	0	0.25	0	0	1.08	1.35	2.07	0.6	0.45	0.1	0	0	0	0.5	0	0	0	0	0	0	0	0.19	1	0
Peak_1716	1	74563101	74563113	+			OK	OK	0	0	0.14	0	0	0	0	0	0	0	0	0	0	0	0	0	0	0	0	0	0	0	0	0.45	0.2	0	0	0.78	0	0	0	0	0	0	0	0	0	0	0	0.4	0
Peak_1717	1	74675737	74675837	+	ENSBTAG00000053503	High	OK	OK	0.23	0.22	0.56	0.56	0	1.9	0.16	5.6	0.32	9.12	1.53	0.68	0.98	95.91	44.72	96.12	61.49	0.21	0.25	0.7	0.88	113.4	102.06	141.93	133	2.25	0.3	0.26	0.8	0.72	0.25	0.37	0	0	0.29	0	0	0	0	6.8	7.83
Peak_1717	1	74675737	74675837	+	ENSBTAG00000012413	High	OK	OK	0.23	0.22	0.56	0.56	0	1.9	0.16	5.6	0.32	9.12	1.53	0.68	0.98	95.91	44.72	96.12	61.49	0.21	0.25	0.7	0.88	113.4	102.06	141.93	133	2.25	0.3	0.26	0.8	0.72	0.25	0.37	0	0	0.29	0	0	0	0	6.8	7.83
Peak_1718	1	74753221	74753229	+			OK	OK	0	0	0	0	0	0	0	0	0	0	0	0	0	0	0	1.08	0.52	0	0	0	0	2.52	0	0.54	1	0.45	0	0	0	0	0	0	0	0	0	0	0	0	0	0	0
Peak_1719	1	74769095	74769122	-			OK	OK	0	0	0	0	0	0	0	0	0	0	0	0	0	0	0	0	0	0	0	0	0	0	0	0	0	0	0	0	0	0	0	0	0	0	0	0	0	0	0	0	0
Peak_1720	1	74769310	74769320	+			OK	OK	0	0	0	0	0	0	0	0	0	0	0	0	0	0	0	0	0	0	0	0	0	0	0	0	0	0	0	0	0	0	0	0	0	0	0	0	0	0	0	0	0
Peak_1721	1	74770854	74770866	+			OK	OK	0	0	0	0	0	0	0	0.28	0	0	0	0	0	0	0	0.54	0	0	0	0	0	0	1.08	0.81	0.3	0	0	0	0	0	0	0	0	0	0	0	0	0	0	0	0
Peak_1722	1	74875875	74875890	+			OK	OK	0	0	0	0	0	0	0	0	0	0.16	0	0	0	0.23	0	0	0	0	0	0	0	0	1.62	0.72	0.4	0	0	0	0	0	0	0	0	0	0	0	0	0	0	0	0
Peak_1723	1	74876518	74876572	+	ENSBTAG00000012413	High	OK	OK	0	0	0	1.08	0.56	0.76	1.28	0.14	0	0.16	0.51	0.68	0	1.61	0.26	0.54	0	0	0	0	0.22	2.16	1.89	1.17	0.9	0	0	0.26	0	0	0	0	0	0	0.58	0.51	0.42	0	0.38	0	0
Peak_1724	1	74877009	74877056	-			OK	OK	0	0	0	0.12	0.28	0.57	1.44	0	0	0	0	0	0	0.23	0	0	0	0	0	0	0	0.36	0	0.45	1.1	0	0	0	0	0	0	0	0	0	0	0.34	0	0	0	0.2	0
Peak_1725	1	74966537	74966546	+			OK	OK	0	0	0	0.08	0	0	0.16	0	0.96	0	0	0	0	0.23	0	1.62	0.26	0	0	0	0	1.08	0	1.44	2.1	0	0	0	0	0	0	0	0	0	0	0	0	0	0	0.4	0
Peak_1726	1	75003728	75003749	+	ENSBTAG00000012413	Low	OK	OK	0	0	0	0	0	0	0	0	0	0	0	0	0	0	0	0.54	0	0	0	0	0	2.16	1.89	0.81	1.3	0	0	0	0	0	0	0	0.81	0	0	0	0	0	0	0.2	0
Peak_1727	1	75003920	75003938	+			OK	OK	0	0	0	0	0	0	0	0	0	0	0	0	0	0	0	0	0.13	0	0	0	0	0.72	1.89	1.98	1.4	0	0	0	0	0	0	0	0	0	0	0	0	0	0	0	0
Peak_1728	1	75004282	75004313	+	ENSBTAG00000012413	High	OK	OK	0	0	0	0.08	0	0	0.16	0	0	0	0.34	0	0	2.07	0.78	2.16	0.26	0	0	0	0	3.24	1.62	3.6	2.3	0	0.2	0	0	0	0.25	0	0.54	0.37	0	0	0	0	0	1.4	1.35
Peak_1729	1	75005023	75005105	+	ENSBTAG00000012413	High	OK	OK	0	0	0	0	0	0	0	0	0	0	0.17	0	0.49	1.61	0.52	0.54	1.43	0	0	0	0	3.24	5.67	5.85	6.4	0	0	0	0	0	0	0	0.27	0	0	0	0	0	0	0.6	1.89
Peak_1730	1	75005270	75005287	-			OK	OK	0	0	0	0	0	0	0	0	0	0	0	0	0	0	0	0	0	0	0	0	0	0.36	0.81	0.54	0.6	0	0	0	0	0	0	0	0	0	0	0	0	0	0	0	1.08
Peak_1731	1	75049959	75049969	+			OK	OK	0	0	0	0	0	0	0	0	0	0	0	0	0	0	0	0	0.39	0	0	0	0	1.8	0	0.72	0.9	0	0	0	0	0	0	0	0	0	0	0	0	0	0	0	1.62
Peak_1732	1	75328877	75328937	+			OK	OK	0	0	0	0	0	0	0	0	0	0	0	0	0	0	0	0	0	0	0	0	0	0	0	0	0	0	0	0	0	0	0	0	0	0	0	0	0	0	0	0	0
Peak_1733	1	75335546	75335547	+			OK	OK	0	0	0	0	0	0	0	0	0	0	0	0	0	0	0	0	0	0	0	0	0	0	0	0	0	0	0	0	0	0	0	0	0	0	0	0	0	0	0	0	0
Peak_1734	1	75922320	75922330	-			OK	OK	0	0.11	0	0	0	0	0	0	0	0	0	0	0	0	0	0	0	0	0	0	0	0	0	0	0	0	0	0	0	0	0	0	0	0	0	0	0	0.41	0.38	0	0
Peak_1735	1	75954342	75954355	-			OK	OK	0	0	0	0	0	0	0	0	0	0	0	0	0	0	0	0	0	0	0	0	0	0.36	0	0	0.2	0	0	0	0.3	0	0	0.37	0	0	0	0	0	0	0	0	0
Peak_1736	1	75955548	75955562	-			OK	OK	0	0	0	0	0	0	0	0	0	0	0	0	0	0	0	0	0	0	0	0	0	0	0	0	0.1	0	0.3	0	0	0	0	0	0	0	0	0	0	0	0	0	0.27
Peak_1737	1	75968206	75968241	-			OK	OK	0	0	0.28	0.08	0.28	0	0.16	0	0.96	0	0	0.68	0	0	0	0	0	0	0	0	0	0.72	0	0.18	0.1	0	0.1	0	0	0	0	0	0	0.37	0	0.17	0	0	0.57	0	0
Peak_1738	1	75983707	75983729	-			OK	OK	1.15	0	0.28	0	0	0	0	0.14	0	0	0	0	0	0	0	0	0	0.63	0	0	0	1.8	0	0	0.6	0	0	0	0	0	0	0	0	0	0	0.34	0	0	0.38	0	0.27
Peak_1739	1	75996123	75996139	-	ENSBTAG00000006945	Medium	OK	OK	0	0	0	0	0	0	0	0	0	0	0	0	0	0	0	0	0	0	0	0.28	0	0	0	0	0	0	0	0	0	0	0	0	0	0	0	0	0	0	0	0	0
Peak_1740	1	76000938	76000980	-	ENSBTAG00000006945	High	OK	OK	0	0	0	0	0	0	0	0	0	0	0	0	0	0	0	0	0	0.21	0	0	0	0	0	0	0	0.9	0.2	0.78	0	0.24	0	0	0	0	0	0	0	0	0	0	0
Peak_1741	1	76001311	76001326	-			OK	OK	0	0	0	0	0	0	0	0	0.96	0	0	0	0	0	0	0	0	0	0	0	0	0	0	0	0	0	0	0	0	0	0.75	0	0	0	0	0	0	0	0	0	0
Peak_1742	1	76005773	76006097	-	ENSBTAG00000006945	High	OK	OK	33.58	16.28	15.12	34.24	27.16	33.63	39.04	33.18	10.56	36.48	45.05	26.52	20.58	14.49	10.4	13.5	6.37	23.31	34.5	6.86	12.1	37.8	21.06	25.74	22.5	28.35	26.8	39.78	16	25.2	15	7.03	27.81	11.1	5.51	13.77	13.44	8.61	8.74	15	17.55
Peak_1743	1	76078545	76078657	+	ENSBTAG00000050537	Medium	OK	OK	0	0.11	0.14	0.24	0	0	2.24	0	0	0.16	0.17	3.4	0.49	0	0	0	0	0	1	0.42	1.98	0	1.35	0.18	0.1	0.45	1	2.08	0.5	0.36	0.5	0.74	0.27	0	0.58	0	0	0	0.57	0	0.54
Peak_1744	1	76102116	76102132	-	ENSBTAG00000018703	High	OK	OK	0	0	0	0	0	0	0	0	0	0	0.17	0	1.96	0	0	0	0	0	0	0	0	0	0	0	0	0	0	0	0	0	0	0	0	0	1.16	0	0	0	0	0	0
Peak_1745	1	76375307	76375320	+	ENSBTAG00000051592	Medium	OK	OK	0	0	0	0	0	0	0	0	0	0	0	0	0	0.23	0	0	0	0	0	0	0	0	0.81	0.09	0.2	0	0	0	0	0	0	0	0	0	0	0	0	0	0	0	0
Peak_1746	1	76386215	76386224	-			OK	OK	0	0	0	0	0	0	0	0	0	0	0	0	0	0	0	0	0	0	0	0	0	0	0	0	0	0	0	0	0	0	0	0	0	0	0	0	0	0	0	0	0
Peak_1747	1	76417812	76417846	-			OK	OK	27.83	190.96	142.38	128	110.32	1141.52	376.8	191.52	436.8	1334.4	82.96	1416.44	645.33	41.17	106.08	251.1	54.73	243.18	191	1042.72	388.52	65.16	389.34	620.01	480.6	261.9	825.7	686.14	59.2	200.64	205.25	57.35	196.02	442.15	291.74	2.38	16.8	43.46	10.26	1	176.58
Peak_1748	1	76584992	76585005	-	ENSBTAG00000013205	High	OK	OK	0	0	0	0	0.28	0	0	0	0.32	0	0	0	0	0	0	0	0	0	0	0	0	0	0	0	0	0	0.2	0	0	0	0	0	0	0	0	0	0	0	0	0	0
Peak_1749	1	76590033	76590045	-	ENSBTAG00000013205	High	OK	OK	0	0	0	0	0	0	0	0	0	0	0	0	0	0	0	0	0	0	0	0	0	0.36	0.27	0	0	0	0	0	0	0	0	0	0	0	0	0	0	0	0	0	0
Peak_1750	1	76591707	76591724	+			OK	OK	0	0	0	0	0	0	0	0	0	0	0	0	0	0	0	0	0	0	0	0	0	0	0	0	0	0	0	0	0	0	0	0	0	0	0	0	0	0	0	0	0
Peak_1751	1	76660933	76661007	-			OK	OK	0	0	0	0	0	0	0	0.42	0	0	0	0	0	0	0	0.54	0.13	0.21	0	0	0.44	0	0	0.36	0.1	0	0	0	0	0	0	0	0	0	0	0	0	0	0	1.2	4.05
Peak_1752	1	76722429	76722458	-	ENSBTAG00000013205	High	OK	OK	0	0	0.14	0.04	0	0	0	0.7	0	0.96	0	0.68	0	0.23	0	1.62	0.52	0	0	0	0	0.36	0	0.09	0.8	0	0	0	0	0	0	0	0.27	0	0	0	0	0	0	0.2	0
Peak_1753	1	76723330	76723502	-	ENSBTAG00000013205	High	OK	OK	2.53	1.43	2.52	3.44	1.12	5.32	2.88	35.98	15.68	46.4	5.95	20.4	6.37	39.33	26	43.2	18.07	5.04	3.25	3.78	6.16	11.52	9.72	8.91	9.4	4.95	5	6.5	1.2	4.32	1.5	11.1	12.69	7.4	0.29	0.51	5.46	1.64	2.47	75.4	80.19
Peak_1754	1	76794837	76794952	+	ENSBTAG00000013456	High	OK	OK	0	0	0	0	0	0	0	0	0	0	0	0	0	0	0	0	0	0	0	0	0	0	0	0	0	0	0	0	0	0	0	0	0	0	0	0	0	0	0	0	0
Peak_1755	1	76869573	76869590	-	ENSBTAG00000006494	High	OK	OK	0	0	0	0	0	0	0	0	0	0	0	0	0	0	1.3	0	0	0	0	0	0	0	0	0	0	0	0	0	0	0	0	0	0	0	0	0	0	0	0	0	0
Peak_1756	1	76973743	76973831	+	ENSBTAG00000013148	High	OK	OK	0.23	0.55	0.14	0.28	0	0	2.72	1.26	1.92	1.6	2.89	2.04	2.45	0.23	0.26	0	0.39	2.94	1.25	0.28	0.88	0	0.81	0.45	0.1	10.8	1.2	8.06	1.7	1.8	0.25	0.37	10.26	4.07	0.58	0.17	1.68	2.05	0.38	0	0.27
Peak_1757	1	76974004	76974026	+	ENSBTAG00000013148	High	OK	Likely_false	0	0	0	0	0	0	0	0	0	0	0	0	0	0	0	0	0	0	0	0	0	0	0	0	0	0	0.2	0.52	0	0	0	0	2.43	5.92	0	0	0	0	0	0	0
Peak_1758	1	76990314	76990502	+			OK	OK	0	0	0.28	0.08	0	0	0	0	0	0.16	0	0	0	0	0	0	0	0	0	0	0	0	0	0	0	0	0.4	0	0.2	0	0	0	0.27	0	0.58	0	0	0	0.19	0	0
Peak_1759	1	77130182	77130275	+	ENSBTAG00000021025	High	OK	OK	0.69	0.44	0.56	0.64	0.84	0.19	1.12	4.48	0	3.2	4.93	6.12	2.45	6.21	2.08	1.08	1.95	2.1	0	0.28	4.4	1.8	0	2.52	1.3	0	0.2	0.26	0	0.36	0	0	1.08	0.37	0	1.19	0	0.41	0.95	2.8	1.62
Peak_1760	1	77130658	77130673	+	ENSBTAG00000021025	Medium	OK	OK	0	0	0.14	0	0	0.19	0	0	0.64	0	0.68	0	0	1.15	0	1.62	0.26	0	0	0	0.22	0	0	0.09	0.2	0	0	0	0	0	0	0	0.54	0	0	0	0	0	0	0.4	0
Peak_1761	1	77181832	77181855	-			OK	OK	0	0	0	0	0	0	0	0	0	0	0	0	0	0	0	0	0	0	0	0	0	0	0	0	0	0	0	0	0	0	0	0	0	0	0	0	0	0	0	0	0
Peak_1762	1	77181912	77181944	+	ENSBTAG00000021025	Low	OK	OK	0	0	0	0	0	0	0	0	0	0	0	0	0	0	0	0	0	0	0	0	0	0	0	0	0	0	0	0	0	0	0	0	0	0	0	0	0	0	0	0	0
Peak_1763	1	77213014	77213043	-			OK	OK	0	0.11	0	0	0	0.57	0	0.14	0	0	0	0	0	0	0	0	0	0	0	0.14	0	0	0	0	0	0	0	0	0	0	0	0	0	0	0	0	0	0	0	0	0
Peak_1764	1	77388392	77388417	-			OK	OK	0	0	0	0	0	0	0	0	0	0	0	0	0	0	0	0	0	0	0	0	0	0	0	0	0	0	0	0.26	0	0	0	0	0.54	0	0	0	0	0	0	0	0
Peak_1765	1	77388676	77388685	-			OK	OK	0	0	0	0	0	0	0	0	0	0	0	0	0	0	0	0	0	0	0	0	0	0	0	0	0	0	0	0	0	0	0	0	0	0	0	0	0	0	0	0	0
Peak_1766	1	77411708	77411794	-	ENSBTAG00000015460	High	OK	Likely_false	0	0	0	0	0	0.38	0	0	0	0	0	0	0	0	0	0	0	0	0	0	0	0	0	0	0	0	0	0	0	0	0	0	0	0	0	0	0	0	0	0	0
Peak_1767	1	77416047	77416154	-	ENSBTAG00000015460	High	OK	Likely_false	0	0	0	0	0	0	0	0	0	0	0	0	0	0	0	0	0	0	0	0	0	0	0	0	0	0	0	0	0	0	0	0	0.27	0	0	0	0	0	0	0	0
Peak_1768	1	77428847	77429003	-			OK	OK	0	0	0	0	0	0	0	0	0	0	0	0	0	0	0	0	0	0	0.5	0	0	0	0	0	0	0	0	0	0	0	0	0	8.64	8.88	0.29	0	0	0	0	0	0
Peak_1769	1	77430440	77430608	-			OK	OK	0	0	0	0	0	0	0	0	0	0	0	0	0	0	0	0	0	0	0	0	0	0	0	0	0	0	0	0.26	0	0	0	0	0	0	0	0	0	0	0	0	0
Peak_1770	1	77446440	77446457	-			OK	OK	0	0	0	0	0	0	0	0	0	0	0	0	0	0	0	0	0	0	0	0	0	0	0	0	0	0	0	0	0	0	0	0	0	0	0	0	0	0	0	0	0
Peak_1771	1	77451429	77451586	-			OK	OK	0	0	0	0	0	0	0	0	0	0	0	0	0	0	0	0	0	0	0	0	0	0	0	0	0	0	0	0	0	0	0.5	0	0.54	0.74	0	0	0	0	0	0	0
Peak_1772	1	77460473	77460483	-	ENSBTAG00000015460	Medium	OK	Likely_false	0	0	0	0	0	0	0	0	0	0	0	0	0	0	0	0	0	0	0	0	0	0	0	0	0	0	0	0	0	0	0	0	0	0	0	0	0	0	0	0	0
Peak_1773	1	77464693	77464707	-	ENSBTAG00000015460	Medium	OK	Likely_false	0	0	0	0	0	0	0	0	0	0	0	0	0	0.23	0	0	0	0	0	0	0	0	0	0	0	0	0	0	0	0	0	0	0	0	0	0	0	0	0	0	0
Peak_1774	1	77472663	77472664	-			OK	OK	0	0	0	0	0	0	0	0	0	0	0	0	0	0	0	0	0	0	0	0	0	0	0	0	0	0	0	0	0	0	0	0	0.54	0	0	0	0	0	0	0	0
Peak_1775	1	77474005	77474007	-			OK	OK	0	0	0	0	0	0	0	0	0	0	0	0	0	0	0	0	0	0	0	0	0	0	0	0	0	0	0	0	0	0	0	0	0.27	0	0	0	0	0	0	0	0
Peak_1776	1	77479655	77479675	-	ENSBTAG00000015460	High	OK	Likely_false	0	0	0	0	0	0	0	0	0	0	0	0	0	0	0	0	0	0	0	0	0	0	0	0	0	0	0	0	0	0	0	0	0	0	0	0	0	0	0	0	0
Peak_1777	1	77488347	77488371	+			OK	OK	0	0	0	0	0	0	0	0	0	0	0	0	0	0	0	0	0	0	0	0	0	0	0	0	0	0	0	0	0	0	0	0	0	0	0	0	0	0	0	0	0
Peak_1778	1	77498547	77498590	-	ENSBTAG00000015460	High	OK	OK	0	0	0	0	0	0	0.16	0.14	0.64	0.32	0.85	0.68	0	0	0	0	0	0	0	0	0	0	0	0	0	0	0.1	0	0	0	0	0	147.42	129.87	0	0	0	0	0	0	0
Peak_1779	1	77687529	77687672	-	ENSBTAG00000015460	Medium	OK	Likely_false	0	0	0	0	0	0	0	0	0	0	0	0	0	0	0	0	0	0	0	0	0	0	0	0	0	0	0	0.52	0	0	0	0	0.27	3.33	1.74	0	0	0	0	0	0
Peak_1780	1	77688683	77688728	-	ENSBTAG00000015460	High	OK	Likely_false	0	0	0	0	0	0	0	0	0	0	0	0	0	0	0	0	0	1.47	0.25	0.42	0	0	0	0	0	0	0.6	0.26	0.4	0.24	0	0.74	17.28	12.95	16.82	0	0	0	0	0	0
Peak_1781	1	77688900	77688930	-	ENSBTAG00000015460	High	OK	Likely_false	0	0	0	0	0	0	0	0	0	0	0	0	0	0	0	0	0	0	0	0	0	0	0	0	0	0	0	0	0	0	0	0	2.16	1.48	3.48	0	0	0	0	0	0
Peak_1782	1	77712163	77712177	-	ENSBTAG00000015460	High	OK	Likely_false	0	0	0	0	0	0	0	0	0	0	0	0	0	0	0	0	0	0	0	0	0	0	0	0	0	0	0	0	0	0	0	0	0	0	0	0	0	0	0	0	0
Peak_1783	1	77745576	77745601	+			OK	OK	0.69	0.33	0	0.36	0	0.38	0	0	0	0	0.51	0.68	0	0	0.26	0	0	0.21	0.25	0	0.66	0.36	0	0.63	0	0.9	0.4	0.52	0.1	0.84	0.25	0	1.08	0	0	0	0	0	0	0	0
Peak_1784	1	78069640	78069641	+			OK	OK	0	0	0	0	0	0	0	0	0	0	0	0	0	0	0	0	0	0	0	0	0	0	0	0	0	0	0	0	0	0	0	0	0	0	0	0	0	0	0	0	0
Peak_1785	1	78077412	78077419	-			OK	OK	0	0	0	0	0	0	0	0	0	0	0	0	0	0	0	0	0	0	0	0	0	0	0	0	0	0	0.1	0	0	0	0	0	0.27	0	0	0	0	0	0	0	0
Peak_1786	1	78169213	78169291	-	ENSBTAG00000032538	High	OK	OK	0	0	0	0	0	0	0	0	0	0	0.17	0	0	0	0	0	0	0	0	0	0	0	0	0	0	0	0	0	0	0	0	0	7.02	5.92	0	0	0	0	0	0	0
Peak_1787	1	78370716	78370826	-	ENSBTAG00000032538	Low	OK	OK	0	0.33	0.98	4	0	13.68	7.04	3.36	1.6	6.24	0	1.36	1.96	0	0	1.08	0	0.42	0	0.14	0.66	0	0	0.18	0.1	0	0.3	0	0	0.12	0.25	0	0.27	0.37	2.03	0.17	0.42	0.41	0.95	0	1.08
Peak_1788	1	78375848	78375854	-			OK	OK	0	0	0	0.32	0	0	0.48	0	0	0	0	0	0	0	0	0	0	0	0	0	0	0	0	0	0	0	0	0	0	0	0	0	0	0	0	0	0	0	0	0	0
Peak_1789	1	78436795	78436858	-			OK	OK	0	0.33	0.84	0.28	0	0	0	2.52	4.16	0.96	0	0	0.98	0	0	0	0	0.63	0	0	1.32	0	0	0	0.2	0	0.6	0	0.4	0.36	0.75	0	0.81	0	0	0.68	1.68	0	0.76	0	0
Peak_1790	1	78438852	78438872	-			OK	OK	0	0	0.7	0	0	0	0	0.84	2.56	0.16	0	0	0	0	0	0	0	0	0	0.14	0.66	0	0	0	0	0	0.6	0	0	0	0	0.37	0	0.74	0	0	0	0.41	0	0	0
Peak_1791	1	78439032	78439044	-			OK	OK	0	0	1.12	0.12	0	0	0	0	0.32	0	0	0	0	0	1.3	0	0	0.21	0	0.14	0.22	0	0	0	0	0	0.3	0	0.1	0	0	0	0	0	0	0	0	0	0.57	0	0
Peak_1792	1	78439252	78439450	-			OK	OK	0	0.88	7.14	0.24	0	0	0.16	7.42	46.08	1.92	0.34	0	0	0	0	0	0	0.21	2.5	4.2	2.42	0	0	0.09	0	0	3.2	0.78	1.8	1.8	1.75	0.74	1.62	0	0	0.68	0	0	0.38	0	0
Peak_1793	1	78440321	78440345	-			OK	OK	0	0	0	0.12	0	0	0	2.24	6.08	0.48	0	0	0.49	0	0	0	0.13	0.63	0	0.28	0.66	0	0	0.09	0	0	0.8	1.56	0	0.12	0.5	0	0	0	0	0	0.84	0.41	0	0	0
Peak_1794	1	78440564	78440911	-			OK	OK	0.46	1.76	7.98	1.04	2.52	1.33	0.8	5.04	74.56	2.08	1.02	1.36	0.98	0	1.3	0	0.91	2.1	1.5	2.38	6.6	1.44	0	0.36	0.2	1.8	3.8	2.08	1	5.88	2.5	0.74	0.54	6.29	0	1.7	0	3.69	2.47	0	0
Peak_1795	1	78441727	78441748	-			OK	OK	0	0	0.56	0	1.12	0.57	0	0.14	0.64	0	0.17	0	0	0	0	0	0	0	0	0	0.44	0	0	0	0	0	0.2	0	0	0	0	0	0	0	0	0	0	0	0	0	0
Peak_1796	1	78443711	78443800	-			OK	OK	0.23	0.11	1.12	0.24	0	0	0	2.94	2.24	1.28	0.17	2.04	0	0	0	1.08	0	0.84	0	1.26	0.44	0	0	0	0	0	1.4	0	0.6	0.36	0.25	0	0	0	0	0	0	0	0.57	0	0
Peak_1797	1	78445054	78445096	-			OK	OK	0	0.11	0.7	0.4	1.4	0.19	1.28	5.18	1.28	8	0.85	0	1.47	0.23	1.04	0	0.13	0.63	0.5	0.84	2.42	0	0	0.09	0.3	0	1.4	2.08	0	0.36	0	0	0	1.48	0.29	0.51	0	0	2.09	0	0
Peak_1798	1	78446132	78446139	-			OK	OK	0	0.11	0.42	0	0	0	0	0.98	1.28	0.32	0	0	0	0	0	0	0	0.42	0	0.14	0.44	0	0	0	0	0	0.2	0	0	0	0	0	0	0	0	0	0	0	0	0	0
Peak_1799	1	78447160	78447310	-			OK	OK	0.23	0	1.54	0.12	0	0.57	0	2.66	14.4	1.76	0	0	0	0	0	0	0	0	0	0.98	0.44	0	0	0.18	0	0	1.5	0.52	1.7	0.48	1.25	1.11	0.27	0	0	0.34	0	0	0.38	0	0
Peak_1800	1	78449124	78449134	-			OK	OK	0	0	0	0.04	0	0	0	0.28	1.28	0	0	0	0	0	0	0	0	0	0	0.56	0	0	0	0	0	0	0.1	0	0	0.12	0	0	0	0	0	0	0	0	0	0	0
Peak_1801	1	78449635	78449664	-			OK	OK	0	0	0.56	0.16	0	0	0.32	0.98	3.84	0.64	0.17	0	0.49	0	0	0	0	0.63	0	0.56	1.98	0	0	0	0	0	2.5	0	0.2	0.24	0	0	0	0	0.29	0.34	0	0	0.57	0	0
Peak_1802	1	78450527	78450541	-			OK	OK	0.23	0	0.7	0	0	0	0.32	0.84	0	0.16	0	0	0	0	0	0	0	0	0	0	0	0	0	0	0	0	0.5	0.26	0.3	0.24	0	0	0	0	0	0	0	0	0	0	0
Peak_1803	1	78450759	78450766	-			OK	OK	0	0	0.14	0	0	0	0.16	0.14	1.28	0	0	0	0	0	0	0	0	0	0	0	0.22	0	0	0	0	0	0.2	0	0.1	0	0	0	0	0	0	0.51	0	0	0	0	0
Peak_1804	1	78451428	78451514	-			OK	OK	0.23	0.11	4.48	0.2	0	0	0	0	17.28	0	0	0	0	0	0	0	0	1.26	0	0.42	4.18	0	0	0	0	0	0.5	0	2.8	4.2	0.75	0.74	0.81	0	0	1.36	0	0	1.14	0	0
Peak_1805	1	78451668	78451819	-			OK	OK	0.92	0	1.68	0.2	0	0.38	0	1.26	10.56	0.64	0	0	0	0	0	0	0	0.42	2.75	0.42	3.3	0	0	0.09	0.2	0	0.3	0.52	1	0.72	0	0.37	0.27	0.37	0	1.19	0	0	0.76	0.2	0
Peak_1806	1	78451995	78452010	-			OK	OK	0	0	0.42	0	0	0	0	1.4	0.64	0.48	0.17	1.36	0	0.46	0	0	0	0.21	0	0	0.66	0	0.27	0	0	0	0.4	0.26	0.3	0.6	0	0	0	0	0	0	0	0	0	0.4	0
Peak_1807	1	78476239	78476248	-			OK	OK	0	0	0	0.04	0	0	0.32	0	0	0.16	0	0	0	0	0	0	0	0	0.25	0	0.66	0	0	0	0.1	0.9	0	0	0	0	0	0	0	0	0	0	0	0	0.38	0	0
Peak_1808	1	78518375	78518390	-			OK	OK	0	0	0	0.04	0	0	0.48	0.28	0	0.32	0	0	0	0	0	0	0	0	0	0	0.22	0	0	0	0	0	0	0	0	0	0	0	0	0	0	0	0	0	0	0	0
Peak_1809	1	78526859	78526982	-			OK	OK	0	0	0.28	0.08	0	0	0	0.28	1.28	0.32	0.85	0	0	0.46	0	0	0	0	0	0.14	1.1	0	0	0.09	0.1	0	0	0.26	0	0	0	0	0	0	0	0	0	0.82	0	0	0
Peak_1810	1	78529612	78529622	-			OK	OK	0	0.22	0	0	0	0	0	0	0.32	0	0	0	0	0	0	0	0	0	0	0	0	0	0	0	0	0	0	0	0	0	0	0	0	0	0	0	0	0	0.19	0	0
Peak_1811	1	78531013	78531024	-			OK	OK	0	0	0	0	0	0	0	0	1.28	0.16	0	0	0	0	0	0	0	0	0	0.42	0.22	0	0	0	0	0	0.2	0	0	0	0.5	0	0	0	0	0	0	0	0	0	0
Peak_1812	1	78531748	78531763	-			OK	OK	0	0	0	0.12	0	0	0	0	1.28	0	0	0	0	0	0	1.62	0	0	0	0	0	0	0	0	0	0	0	0.26	0.3	0.12	0	0	0	0	0	0	0	0	0.19	0	0
Peak_1813	1	78535000	78535139	-			OK	OK	0	0.22	0	0.04	0	0.19	0	1.12	0	0	0	0	0	0.23	0.26	0	0	0	0	0.28	1.32	0.36	0	0.18	0	0	0.4	0.52	0	0	0.25	0	0.54	0	0	0	0	0	0.95	0	0
Peak_1814	1	78542528	78542560	-			OK	OK	0	0	0.14	0.08	0	0	0	2.1	0.96	0.96	0.51	0	0	0	0.26	0	0	0.84	1	0	0	0	2.43	0	0	0.45	0.1	1.04	0	0.12	0	0	0	0	0	0	0	0	0.19	0	0
Peak_1815	1	78558429	78558444	-			OK	OK	0	0	0	0	0	0	0	0	0	0.32	0	0	0	0	0	0	0	0	0	0	0	0	0	0	0	0	0.2	0	0	0	0	0	0	0	0	0	0	0	0	0	0
Peak_1816	1	78563894	78563908	-			OK	OK	0	0	0	0	0	0	0	0	0	0	0	0	0	0	0	0	0	0	0	0	0	0	0	0	0	0	0.1	0	0.2	0	0	0	0	0	0	0	0	0	0	0	0
Peak_1817	1	78621565	78621578	-			OK	OK	0	0	0	0.04	0	0	0	0.56	0	0.96	0	0	0	0	0	0	0	0	0.25	0	0	0	0.54	0.09	0	0	0.1	0.52	0	0	0	0	0	0.37	0	0	0	0.41	0	0	0
Peak_1818	1	78635643	78635651	-			OK	OK	0	0	0	0	0	0	0	0	0	0	0	0	0	0	0	0	0	0	0	0	0	0	0	0	0	0	0.7	0	0	0	0	0	0	0	0	0	0	0	0	0	0
Peak_1819	1	78686214	78686244	-			OK	OK	0	0	0	0.08	0.56	0.19	0	0.56	0.64	0.8	0	0	0	0	0	0	0.13	0.21	0	0	0	0	0	0	0.1	0	0	0.26	0	0	0	0	0	0	0	0	0	0	0	0	0
Peak_1820	1	78689822	78689838	-			OK	OK	0	0	0	0	0	0	0	0	0.96	0	0	0	0	0	0	0	0	0.21	0	0	0	0	0.54	0.09	0.1	0	0	0.26	0	0	0	0	0	0	0	0	0.42	0	0	0	0
Peak_1821	1	78711199	78711213	-			OK	OK	0	0.44	0.28	0.08	0	0.38	0	0.14	2.24	0.64	0	0	0	0	0	0	0.13	0	0	0	0	0	0	0.18	0	0.45	0.1	0	0	0.12	0	0	0	0	0	0.17	0	0	0	0	0.54
Peak_1822	1	78732274	78732292	-			OK	OK	0	0	0.28	0	0	0	0	0	0	0	0	0	0	0	0	0	0	0	0	0	0	0	0	0	0	0	0	0	0	0	0.25	0	0	0	0	0	0	0	0	0	0
Peak_1823	1	78737486	78737577	-	ENSBTAG00000044001	High	OK	Likely_false	0	0.22	0.42	0.04	0	0.19	0	3.22	6.4	3.84	0.17	0	0	0	0	0	0	0.21	1.25	0.28	1.32	0	0	0	0	0.9	1	1.82	0	0	1	0	0.54	0	0	0	0	0.82	0.57	0	0
Peak_1824	1	78746359	78746374	-			OK	OK	0	0.11	0	0	0	0	0	0.28	0.64	0.96	0.85	0	0	0	0	0	0.39	0	0	0	0.44	0	0	0	0	0	0	0.26	0	0.12	0	0	0	0	0	0.17	0	0	0	0	0
Peak_1825	1	78786943	78787047	-	ENSBTAG00000044001	High	OK	Likely_false	0	0	0	0	0	0	0.16	0.14	0.32	0.16	0	0	0	0	0	0	0	0	0	0	0	0	0	0	0	0	0.1	0	0	0	0.25	0	0	0.37	0	0	0	0	0	0	0
Peak_1826	1	78787071	78787122	+			OK	OK	0	0	0	0	0	0	0	0	0	0	0	0	0	0	0	0	0	0	0	0	0	0	0	0	0	0	0	0	0	0	0	0	0	0	0	0	0	0	0	0	0
Peak_1827	1	78787404	78787406	-			OK	OK	0	0	0	0.04	0	0.19	0	0.14	0.32	1.28	0.68	0	0	0	0	0	0	0	0	0	0.22	0	0	0	0	0	0.1	0	0	0	0	0	0	0	0	0	0	0	0	0	0
Peak_1828	1	78805738	78805746	-			OK	OK	0	0.11	0	0	0	0	0	0	0	0.16	0.17	0	0.98	0	0	0	0	0	0	0.14	0.22	0	0	0	0.1	0	0.4	0.78	0	0	0.75	0	0	0	0	0	0	0	0	0	0
Peak_1829	1	78805984	78805988	-			OK	OK	0.46	0	0	0.04	0	0	0	0.84	0	0.16	0.17	0	0	0	0	0	0	0	0	0.14	0	0	0	0	0.1	0	0	0	0	0	0	0	0.27	0	0	0	0	0	0	0	0
Peak_1830	1	78810457	78810469	-	ENSBTAG00000044001	Low	OK	Likely_false	0	0	0	0	0	0	0	0	0	0	0	0	0	0	0	0	0	0.63	0	0	0	0	0	0	0	1.35	0.1	0.26	0	0.24	0.25	0.37	0	0	0.29	0	0	0	0	0	0
Peak_1831	1	78814272	78814427	-			OK	OK	0	0	0.28	0.12	0	0	0	0	3.2	0	0	0	0	0	1.3	0	0.13	0	0	0.14	0	0	0	0.09	0	0	0.2	0	0.1	0	0	0.37	0	0	0	0.17	0	0	0.38	0	0
Peak_1832	1	78832221	78832236	-			OK	OK	0	0	0	0	0	0	0	0.98	0	0.64	0	0	0	0	0	0	0	0	0	0.7	0	0	0	0	0.4	0	0	0.26	0	0	0	0	0.27	0	0	0.17	0	0	0.95	0	0
Peak_1833	1	78834630	78834647	-			OK	OK	0	0	0	0.04	0	0	0	1.54	0.32	3.68	0	0	0	0	0	0	0	0	0	0	0	0	0	0	0	0	0	0	0	0	0	0	0	0	0	0	0	0	0.19	0	0
Peak_1834	1	78838444	78838460	-			OK	OK	0	0	0	0.16	0	0.19	0	0.14	0	0.16	0	0	0.49	0	0	0	0	0	0	0	0	0	0	0	0	0	0.1	0.26	0	0	0	0	0	0	0	0	0	0	0	0	0
Peak_1835	1	78925358	78925369	-			OK	OK	0	0	0.56	0	0	0.19	0	0	0.32	0.16	0	0	0	0	0	0	0	0	0	0.28	0	0	0	0	0.3	0	0.1	0.78	0	0	0	0	0	0	0	0	0	0	0	0.6	0
Peak_1836	1	78935454	78935579	-	ENSBTAG00000044001	High	OK	Likely_false	0	0	0	0	0	0	0	0.28	0	0.32	0	0	0	2.76	4.42	6.48	3.9	0	0	0	0	1.08	0.54	0.54	0.8	0	0	0	0	0	0	0	0	0	0	0	0	0	0.19	1.6	0.81
Peak_1837	1	78942127	78942139	-			OK	OK	0	0	0	0.08	0	0	0	0	0	0	0	0	0	0	0	0	0	0	0	0	0	0	0	0	0	0	0	1.04	0	0	0	0	0	0	0	0	0	0	0	0	0
Peak_1838	1	78944628	78944645	-			OK	OK	0.46	0.99	0	0.24	1.4	0.38	0.8	1.4	0.32	2.24	0.17	0	0	0	0	0	0	0.21	0.5	0.14	1.1	0.72	2.7	0.27	0.1	4.95	0	1.56	0	0	0.25	0	0	0	0	0	2.1	0	0.19	0	0
Peak_1839	1	78954241	78954255	-			OK	OK	0	0	0	0	0	0	0.16	0	0	0	0	0	0	0	0	0	0	0	0	0	0	0	0	0	0	0	0.4	0	0	0	0	0	0.54	0	0	0	0	0	0	0	0
Peak_1840	1	79008952	79008958	-			OK	OK	0	0	0	0.28	0	1.71	0	0	0	0.32	0	0	0	0	0	0	0	0	0	0	1.98	2.52	0	0	0.3	0	0	2.6	0	0	0	0	0	0	0	0	0	0.41	0.38	0	0
Peak_1841	1	79053127	79053139	-			OK	OK	1.61	0	0	0	0	0	0	0.14	0	0	0	0	0	0	0	0	0	0	0	0	0	0	0	0	0	0	0	0.26	0	0	0	0	0	0	0	0	0	0	0	0	0
Peak_1842	1	79071467	79071474	-			OK	OK	0	0	0	0	0	0	0	0	0	0	0	0	0	0	0	0	0	0	0	0	0	0	0	0	0	0	0.2	0	0	0	0	0	0	0	0	0	0	0	0	0	0
Peak_1843	1	79081382	79081397	-			OK	OK	0	0.11	0	0	0	0	0.16	0	0.32	0	0	0	0	0	0	0	0	0	0	0	0	0	0	0	0	0	0.3	0.78	0	0	0	0	0	0	0	0	0	0	0.19	0	0
Peak_1844	1	79087344	79087383	-	ENSBTAG00000044001	High	OK	Likely_false	0	0.11	0	1.72	0	0.38	1.28	0.98	1.92	0.64	0.17	0	0	0	0	0	0	0.21	0	0.14	0	0	0	0	0	0.45	0	0	0	0.12	0	0	1.08	1.11	0	0.34	0	0	0	0	0
Peak_1845	1	79088286	79088293	-			OK	OK	0	0.11	0	0	1.68	0	0	0.42	0	0.8	0.34	0	0	0	0	0	0	0	0	0.14	0.22	0	0.81	0	0	0	0.2	0	0	0.12	0	0	0	0	0	0	0	0.82	0	0	0
Peak_1846	1	79089050	79089065	-			OK	OK	0	0	0	0	0	0.38	0	0.14	0.64	0.32	0	0	0	0	0	0	0	0	0.25	0.28	0	0	0	0	0.5	0	0	0	0	0	0	0	0	0	0	0.17	0	1.64	0.38	0	0
Peak_1847	1	79104441	79104482	-			OK	OK	0	0.44	0.56	0	0	0	0	0.14	1.28	0	0	0	0	0	0	0	0	0	0	0	0.44	0	0	0	0.3	0	0.2	0	0	0	0	0	0	0	0	0	0	0	0.19	0	0
Peak_1848	1	79108291	79108298	-			OK	OK	0	0	0	0.04	0	0	0	0.28	0	0.16	0	0	0	0	0	0	0	0	1	0	0.22	0	0	0.09	0	0	0	0	0	0	0	0	0	0	0	0.17	0	0.41	0	0	0
Peak_1849	1	79109725	79109749	+			OK	OK	0	0	0	0	0	0	0	0	0	0	0	0	0	0	0	0	0	0	0	0.14	0	0	0	0	0	0	0.1	0	0	0	0	0	0	0	0	0	0	0	0	0	0
Peak_1850	1	79109963	79110007	-	ENSBTAG00000044001	Low	OK	Likely_false	0	0	0	0	0	0	0.16	0.56	0	0.96	0	0	0	0	0	0	0	0	0	0.14	0.66	0	0	0	0	0	0.2	1.3	0	0	0.5	0	0	1.11	0	0	0	0.41	0	0	0
Peak_1851	1	79110620	79110642	-			OK	OK	0	0	0.42	0.2	1.4	0	1.6	1.68	0	0.32	0.17	0	0	0.23	0	0	0.13	0.84	0	0	1.1	0	0	0.36	0.9	0.9	0.3	1.04	0	0.36	0	0	0.27	0.37	0	2.55	1.68	3.28	1.33	0	0
Peak_1852	1	79110856	79110868	-			OK	OK	0	0	0.42	0.12	0	0.38	0.32	0.14	0	0	0	0	0	0	0	0	0	0.63	0	0	0	0.72	0	0	0	0.45	0	0	0	0.12	0	0	0	0	0	0.17	0	0	0.19	0	0
Peak_1853	1	79111157	79111198	+			OK	OK	0	0.11	0	0	0	0	0	0	0	0	0	0	0	0	0	0	0	0	0	0	0	0	0	0	0	0	0.2	0.26	0	0	0	0	0	0	0	0	0	0	0	0	0
Peak_1854	1	79111940	79111963	+			OK	OK	0	0	0	0	0	0	0	0	0	0	0	0	0	0	0	0	0	0	0	0	0	0	0	0	0	0	0	0	0	0	0	0	0	0	0	0	0	0	0	0	0
Peak_1855	1	79113434	79113557	-	ENSBTAG00000044001	High	OK	Likely_false	0	0.22	0	0	0	0	0	0.14	0.96	0.16	0.34	0.68	0	0	0	0	0	1.05	0	0.28	0	0	0	0	0.1	4.05	10	23.14	0	0	2	0	0	0.37	0	0	0	0.82	0	0	0
Peak_1856	1	79116020	79116029	-			OK	OK	0	0	0	0	0.56	0	0	0.42	0	0.96	0	0	0.49	0	0	0	0	0	0	0	0	0	0	0	0	0	0	0	0	0	0	0	0	0	0	0	0	0	0	0	0
Peak_1857	1	79118523	79118537	-			OK	OK	0	0	0.14	0	0	0	0	0	0	0	0	0	0	0	0	0	0	0	0	0	0	0	0	0	0	0	0	0	0	0	0	0	0	0	0	0	0	0	0	0	0
Peak_1858	1	79127746	79127769	-			OK	OK	0	0.11	0	0.16	0	0.19	0	1.26	0.32	2.24	0.17	0	0	0	0	0	0	0	0.5	0.14	0.44	0	0.81	0.36	0	0	0	0.26	0	0	0	0	0	0	0	0	0	0	0	0	0
Peak_1859	1	79136138	79136303	-	ENSBTAG00000044001	High	OK	Likely_false	8.51	26.51	64.12	3.96	2.8	3.99	6.24	581	242.24	283.52	19.72	16.32	22.05	1.38	0	0	1.17	88.41	53	43.68	223.08	0.36	0	7.47	0.1	50.85	59.4	37.44	10.8	20.4	3.75	9.99	101.25	29.6	0.87	4.08	0.42	0.41	0.95	0.4	0
Peak_1860	1	79151786	79151865	-			OK	OK	0	0.22	0	0.08	0	0.57	0	0.84	0	0.32	0	0	0	0	0	0	0	0	0	0	0.44	0	0	0.09	0	0	0	0	0.1	0.12	0	0	0	1.11	0	0	0	0	0	0	0
Peak_1861	1	79155957	79156013	-	ENSBTAG00000044001	High	OK	Likely_false	0	0	0	0	0	0	0.16	0	0	0.32	0	0	0	0	0	0	0	0	0	0	0	0	0	0.18	0	0	0	0	0	0	0	0	0	0	0	0	0	0	0	0	0
Peak_1862	1	79157030	79157041	-			OK	OK	0	0.22	0	0	0.28	0	0	0	0.64	0.32	0	0	0	0.23	0	0	0	0	0	0	0.44	0	0	0	0	0.45	0	0.26	0	0	0	0	0	0	0	0	0	0	0	0	0
Peak_1863	1	79167560	79167666	-	ENSBTAG00000044001	High	OK	Likely_false	0	0	0	0	0	0	0	0	0	0	0	0	0	0	0	0	0	0	0	0	0	0	0	0	0	0	0	0	0	0	0	0	0	0	0	0	0	0	0	0	0
Peak_1864	1	79188216	79188228	+			OK	OK	0	0	0	0	0	0	0	0	0	0	0	0	0	0	0	0	0	0	0	0	0	0	0	0	0	0	0.3	0	0	0	0	0	0	0	0	0	0	0	0	0	0
Peak_1865	1	79188566	79188594	-	ENSBTAG00000044001	High	OK	Likely_false	0	0	0	0.04	0	0	0	0	0	0	0	0.68	0	0	0	0	0	0	0	0	0	0	0	0	0	0	0	0	0	0	0	0	0	0	0	0	0	0	0	0	0
Peak_1866	1	79191428	79191441	-			OK	OK	0	0	0	0	0	0	0	0	0.96	0	0	0	0	0	0	0	0	0	0	0	0	0	0	0	0	0	0	0	0.2	0	0	0	0	0	0	0	0	0	0	0	0
Peak_1867	1	79193751	79194133	-	ENSBTAG00000044001	High	OK	OK	52.67	92.51	249.48	223.92	65.8	355.11	435.36	804.02	376	661.44	160.65	329.8	241.57	53.13	37.44	58.86	24.44	185.64	250.5	105.56	357.28	47.16	28.62	197.46	37.3	313.2	266.5	331.24	88.3	162.72	42.25	89.91	272.43	106.56	37.12	185.98	214.62	139.81	224.01	7.2	10.26
Peak_1868	1	79193833	79193905	+			OK	OK	2.07	0.33	0.98	3.4	1.12	3.04	2.88	0.42	0	1.44	2.21	0.68	3.92	3.91	1.56	2.16	2.21	0.84	2.25	0.56	1.76	3.6	2.43	2.25	2.1	1.8	0.2	0.78	1.2	0.6	0	0	1.08	2.22	0.29	1.19	1.68	0.41	1.14	0.2	2.43
Peak_1869	1	79194071	79194113	+			OK	OK	0.69	0.66	1.54	2.16	0	1.9	3.2	0.84	0.96	3.2	1.7	1.36	4.9	0.92	0.78	2.16	1.17	0.84	0.5	0.28	0.66	2.16	1.08	0.63	1.6	0.45	1.1	2.6	0.3	1.2	0.75	0	0.27	1.11	0	2.55	4.62	2.46	1.52	0.6	0
Peak_1870	1	79194495	79194558	-	ENSBTAG00000044001	High	OK	Likely_false	0.46	2.09	3.5	3.56	0.84	5.32	3.68	5.04	3.84	2.88	0.51	2.72	1.96	1.38	0.52	1.62	0.39	0.42	0.75	0.7	3.96	1.08	0.27	3.51	0.1	0	1.4	5.2	0.6	1.2	0	0	2.7	0	2.32	4.25	1.68	4.1	1.33	0	0
Peak_1871	1	79197247	79197251	-	ENSBTAG00000044001	High	OK	Likely_false	0	0	0	0	0	0	0	0	0	0	0	0	0	0	0	0	0	0	0	0	0	0	0	0	0	0	0	0	0	0	0	0	0	0	0	0	0	0	0	0	0
Peak_1872	1	79197926	79197941	+			OK	OK	0	0	0	0	0	0	0	0	0.64	0	0	0	0	0	0	0	0	0	0	0	0	0	0	0	0.1	0	0	0	0	0	0	0	0	0	0	0	0	0	0.38	0	0
Peak_1873	1	79205502	79205517	-	ENSBTAG00000044001	Low	OK	Likely_false	0	0	0	0	0	0	0	0	0	0	0	0	0	0	0	0	0	0	0	0	0	0	0	0	0	0	0	0	0	0	0	0	0	0	0	0	0	0	0	0	0
Peak_1874	1	79291520	79291526	-			OK	OK	0	0	0	0.16	0	0.38	1.44	0	0.64	0	0.17	0	0.49	0	0	0	0	0	0	0	0	0	0	0	0	0	0	0	0	0	0	0	0	0	0	0	0	0.82	0	0	0
Peak_1875	1	79291873	79291888	-			OK	OK	0	0	0.14	0.08	0	0	0.16	0	0	0	0	0	0.98	0	0	0	0	0	0	0	0	0	0	0	0	0	0	0	0	0	0	0	0.27	0	0	0	0	0	0	0	0
Peak_1876	1	79295350	79295365	-			OK	OK	0	0	0	0	0	0	0	0	0	0	0	0	0	0	0	0	0	0	0	0	0	0	0	0	0	0	0	0	0	0	0	0	0	0	0	0	0	0	0	0	0
Peak_1877	1	79304075	79304080	-			OK	OK	0	0	0	0.04	0	0	0	0	0	0	0	0	0	0	0	0	0	0	0	0	0	0	0	0	0	0	0	0	0	0	0	0	0	0	0	0.85	0.84	2.05	2.47	0	0
Peak_1878	1	79308181	79308195	-			OK	OK	0	0	0	0	0	0	0	0	0	0	0	0	0	0	0	0	0	0	0	0	0	0	0	0	0	0	0	0	0	0	0	0	0	0	0	0	0	0	0	0	0
Peak_1879	1	79308362	79308395	+			OK	OK	0	0	0	0	0	0	0	0	0	0	0	0	0	0	0	0	0	0	0	0	0	0	0	0	0	0	0	0	0	0	0	0	0	0	0	0	0	0	0	0	0
Peak_1880	1	79313084	79313093	+			OK	OK	0	0	0	0	0	0	0	0	0	0	0	0	0	0	0	0	0	0	0	0	0	0	0	0	0	0	0	0	0	0	0	0	0	0	0	0	0	0	0	0	0
Peak_1881	1	79346022	79346050	+			OK	OK	0	0	0	0	0	0	0	0	0	0	0	0	0	0	0	0	0	0	0	0.14	0	0	0	0	0	0	0.2	0	0.1	0	0	0	0	0	0	0	0	0	0	0	0
Peak_1882	1	79356889	79356956	+			OK	OK	0	0	0	0.04	0	0	0	0	0	0	0	0	0	0	0	0	0	0	0	0	0	0	0	0	0	0	0	0	0	0	0	0	0	0	0	0	0	0	0	0	0
Peak_1883	1	79362291	79362295	-			OK	OK	0	0	0	0	0	0	0	0	0	0	0	0	0	0	0	0	0	0	0	0	0	0	0	0	0	0	0.1	0	0	0	0	0	0	0	0	0	0	0	0	0	0
Peak_1884	1	79362417	79362478	+	ENSBTAG00000055241	Medium	OK	OK	0.46	0	0	0	0	0	0	0	0	0	0	0	0	0	0	0	0	0	0	0	0	0	0	0	0	0	0.8	0.78	0	0	0	0	0	0	0	0	0	0	0	0	0
Peak_1885	1	79388318	79388319	-			OK	OK	0	0	0	0	0	0	0	0	0	0	0	0	0	0	0	0	0	0	0	0	0	0	0	0	0	0	0	0	0	0	0	0	0	0	0	0	0	0	0	0	0
Peak_1886	1	79388598	79388607	+			OK	OK	0	0	0	0.04	0	0	0	0	0	0	0	0	0	0	0	0	0	0	0	0	0	0	0	0	0	0	0	0	0	0	0	0	0	0	0	0	0	0	0	0	0
Peak_1887	1	79397720	79397734	+			OK	OK	0	0	0	0	0	0	0	0	0	0	0	0	0	0	0	0	0	0	0	0	0	0	0	0	0	0	0.1	0.26	0	0	0	0	0	0	0	0	0	0	0	0	0
Peak_1888	1	79398963	79399004	-			OK	OK	0	0	0	0	0	0	0	0	0	0	0	0	0	0	0	0	0	0	0	0	0	0	0	0	0	0	0.6	0	0	0	0	0	0	0	0	0	0	0	0	0	0
Peak_1889	1	79399096	79399116	+			OK	OK	0	0	0	0	0	0	0	0	0	0	0	0	0	0	0	0	0	0	0	0	0	0	0	0	0	0	0.2	0.26	0	0	0	0	0	0	0	0	0	0	0	0	0
Peak_1890	1	79413721	79413855	+	ENSBTAG00000055241	High	OK	OK	0	0.55	0.28	7.2	3.64	7.22	8	0	0	0	7.82	38.08	7.35	0	0	0	0	0.21	0	0	0.44	0	0	0	0	0	1.1	1.56	0	0	0.25	0	0	1.11	0	8.84	9.66	20.5	12.54	0	0
Peak_1891	1	79426558	79426616	-			OK	OK	0	0	0	0	0	0	0	0	0	0	0	0	0	0	0	0	0	0.21	0	0	0.22	0.72	0	0.27	0.4	0.45	0.1	0.26	0	0	0	0	0.81	2.22	0.87	0	0	0	0	0	0
Peak_1892	1	79438961	79439020	+			OK	OK	0	0	0.14	0	0	0	0	0	0	0	0	0	0	0	0	0	0	1.68	3.5	0	0.66	0	0	0	0	0.45	1	1.56	0.2	0	0.25	0.74	0	0	0	0	0	0	0	0	0
Peak_1893	1	79465233	79465251	+			OK	OK	0	0	0	0	0	0	0	0	0	0	0	0.68	0.49	0	0	0	0	0	0	0	0	0	0	0	0	0	0	0	0	0	0	0	0	0	0	0.85	0.42	0.41	0.95	0	0
Peak_1894	1	79524111	79524157	-			OK	OK	0	0	0	1.2	0.84	5.89	1.6	0	0	0	0.34	0	0	0	0	0	0	0	0	0	0	0	0	0	0	0	0	0	0	0	0	0	0	0	0	0	0	0	0	0	0
Peak_1895	1	79559182	79559188	-	ENSBTAG00000044001	Low	OK	Likely_false	0	0	0	0	0	0	0	0	0	0	0	0	0	0	0	0	0	0	0	0	0	0	0	0	0	0	0	0	0	0	0	0	0	0	0	0	0	0	0	0	0
Peak_1896	1	79585626	79585634	-			OK	OK	0	0	0	0.04	0	0	0	0	0	0	0	0	0	0	0	0	0	0	0	0	0	0	0	0	0	0	0	0	0	0	0	0	0	0	0	0	0	0	0	0	0
Peak_1897	1	79586718	79586726	+	ENSBTAG00000001511	Low	OK	OK	0	0	0	0.24	0	0	0	0	0	0	0	0.68	0	0	0	0	0	0	0	0	0	0	0	0	0	0	0	0	0	0	0	0	0.27	0	0	0	0	0	0	0	0
Peak_1898	1	79586767	79586862	-			OK	OK	0.23	0	0.14	1.4	0	1.71	1.12	0	0	0	0.17	0	0.49	0.23	0.78	1.08	0	0.21	0.75	0	0.22	1.08	1.35	0.54	0.6	0	0	0	0.1	0.24	0	0	0.27	0.37	0.58	0.68	0.84	0.82	2.47	0.4	1.35
Peak_1899	1	79587179	79587301	+	ENSBTAG00000001511	High	OK	OK	3.22	4.51	2.8	8.44	1.96	12.16	12.8	12.18	11.52	21.76	4.93	6.12	8.82	11.96	5.98	9.72	5.85	5.67	4.5	1.96	4.18	49.68	33.21	44.28	24.6	6.75	7	11.7	1.3	1.32	0.75	0.74	7.83	4.81	12.47	5.78	8.4	2.05	7.98	3.2	9.45
Peak_1900	1	79587685	79587698	+			OK	OK	0	0	0	0.8	0	0	0.16	0	0	0	0.17	0	1.96	0.69	0	0	0	0	0.25	0.56	0	0	0	0	0	0	0	0	0	0	0	0	0	2.59	0	0	0	0.82	0.95	0.2	0
Peak_1901	1	79588323	79588334	+			OK	OK	0	0	0	0.16	0.56	0.38	0	0.28	0.64	0.16	0	0	0	0	0	0	0	0	0	0	0	0	0	0.27	0	0	0	0	0	0	0	0	0	0.74	0	0.17	0	0	0	0	0
Peak_1902	1	79588688	79588781	-			OK	OK	0	0	0	0.4	0	0.38	0.16	0.14	0	0.16	0	0.68	0	0.23	0	0	0	0	0	0	0.22	1.44	0	0.99	0.7	0	0.1	0	0	0	0	0	0	0.37	0	0.17	0.84	0.41	0.76	0	0
Peak_1903	1	79588955	79588970	-			OK	OK	0	0	0	0.56	0	0.95	1.76	0	0	0.16	0.34	1.36	0	0	0	0	0	0	0	0	0	0	0	0	0.2	0.45	0	0	0	0	0	0	0.27	0	0.29	0	0	0.41	0	0	0
Peak_1904	1	79589309	79589323	+			OK	OK	0	0	0	0.08	0.28	0	0	0	0	0.16	0	0	0	0	0	0	0	0	0	0.28	0	0	0	0	0	0	0	0	0	0	0	0	0	0	0	0	0	0	0	0	0
Peak_1905	1	79590842	79590858	+			OK	OK	0	0	0	0.44	0	0	0	0	0	1.12	0.51	0	0	0	0	0	0	0	0	0	0	0.36	0	0	0.1	0	0	0	0	0	0	0	0	0	0	0	0	0	0.19	0.2	0
Peak_1906	1	79610238	79610276	+	ENSBTAG00000001511	High	Low_H3K4me3	OK	0	0	0	0.52	0	1.71	0.16	0	0.64	2.24	0.34	0	0.49	0	1.56	2.16	0.52	0.21	0.25	0.14	0.22	0.36	0.27	2.34	1.5	0	0	0.78	0.1	0	0	0	0.54	0.37	0.29	0.17	0	0	0.76	0.2	1.89
Peak_1907	1	79657897	79658072	+	ENSBTAG00000017312	High	OK	OK	180.32	185.35	84.7	0	0	0	0	0	0	0	0	0	0	1374.48	1828.32	910.44	808.34	249.48	35	38.92	154.22	0	0.27	0.9	75.2	62.55	25.8	27.56	247.7	588.84	50.25	93.61	2.43	1.11	0.29	0	0	0.41	0.19	12.6	72.09
Peak_1908	1	79916250	79916302	-	ENSBTAG00000032265	High	OK	OK	0.69	1.87	0.84	2.88	5.6	12.35	4.8	0.14	2.24	1.12	0.34	14.96	4.41	0.92	0.52	4.32	1.17	0.42	1.25	0.98	2.2	2.16	1.89	3.42	1	4.05	4.7	3.38	2.9	1.8	0.25	1.11	1.08	1.11	5.51	1.87	5.04	10.66	3.99	0.2	1.89
Peak_1909	1	80005662	80005711	+			OK	OK	0	0	0	0.04	0.56	0.95	0	0	0.64	0.16	0	0	1.96	1.15	0	0	0.26	0	0	0	0	3.24	1.35	1.71	0.4	0	0.5	0.78	0	0	0	0	0	0	0.87	0.17	0.84	2.46	0	0.2	0.81
Peak_1910	1	80006017	80006032	+	ENSBTAG00000012467	High	OK	OK	0	0	0.14	0.12	0	0.38	0	0.98	0	0.64	0	0	0	0.23	0	0.54	0	0	0.25	0.28	0.44	1.8	2.97	2.34	0.8	0	0.7	1.3	0.1	0	0	0	0.27	2.59	1.16	0	0	0	0.19	0	2.16
Peak_1911	1	80006114	80006155	-			OK	OK	0	0	0	1.08	0.28	3.23	0.64	0.42	0	0.16	0	4.76	1.47	0	1.3	0	0	0	0	0	0.22	2.88	1.35	1.98	3.1	0.45	0.8	1.56	0	0.24	0	0	3.78	3.33	3.19	29.24	70.14	55.76	40.09	0.8	0.81
Peak_1912	1	80006286	80006316	+	ENSBTAG00000012467	High	OK	OK	0	0	0	2.2	0.56	4.75	6.08	1.26	0	0.48	0.68	1.36	0.98	0	0	2.16	0.13	1.05	0.5	0	0.44	10.08	8.1	7.02	2.7	0	3	8.58	0.2	0	0.5	0	4.59	3.33	4.35	0.85	3.78	3.28	0.76	0.6	0.54
Peak_1913	1	80006597	80006764	-			OK	OK	0	0	0	0.4	0.56	1.9	1.6	0.56	0	1.28	0.85	4.08	2.94	0.92	1.82	0	0.91	0	0.5	0	0.66	2.88	2.7	4.95	4.3	1.8	0.3	1.04	0	0	0	0	0.27	2.22	1.74	1.19	0.42	0	0.76	0.6	4.32
Peak_1914	1	80006924	80006939	-			OK	OK	0	0	0	0.16	0	0.19	0.32	0.28	0	0	0	0	0	0	0	0	0.26	0	0	0	0.44	0	0.27	0.09	0.5	0	0	0.26	0	0.12	0	0	0	0	0	0	0	0	0	0	0.54
Peak_1915	1	80130304	80130320	-			OK	OK	0	0	0	0	0	0	0	0	0	0	0	0	0	0	0	0	0	0	0	0	0	0	0	0	0	0	0	0	0	0	0	0	0	0	0	0	0	0	0	0	0
Peak_1916	1	80130388	80130491	+			OK	OK	0	0	0	0	0	0	0	0	0	0	0	0	0	0	0	0	0	0	0	0	0	0	0	0	0	0	0	0	0	0	0	0	0	0	0	0	0	0	0	0	0
Peak_1917	1	80196579	80196692	-	ENSBTAG00000010357	High	OK	OK	0.92	0.22	0.14	0.04	0	0	0.16	0.14	0.32	0	0	0	0	0	0	1.62	0.13	0	0.75	0	0.44	0	0	0.09	0	0	0.2	0.78	0.1	0	0.25	0.37	0	0	0	0.51	0	0.82	0.19	0	0
Peak_1918	1	80204766	80204778	-			OK	OK	0	0.11	0	0	0.84	0.38	0	0.28	0.32	0	0.17	0	0	0	0	0	0	0	0	0	0	0	0	0.09	0.1	0.45	0	0	0	0	0	0	0	0	0	0	0	0	0	0	0
Peak_1919	1	80222251	80222385	-	ENSBTAG00000010357	High	OK	OK	10.12	3.3	16.94	0.04	0	0	0	0	0	0.64	0.68	0	0	0	0	0	0	0	0	0	0	0	0	0.09	0	1.8	0.1	2.6	0.3	0.36	0	0	0	0	0	0	0	0.41	0	0	0
Peak_1920	1	80224796	80224831	+			OK	OK	3.22	0.44	1.68	0	0	0	0	0	0	0	0	0	0	0	0	0	0	0	0	0	0	0	0	0	0	0	0.1	0.52	0	0.12	0	1.48	0	0	0	0	0	0	0	0	0
Peak_1921	1	80239504	80239562	-	ENSBTAG00000010357	High	Low_H3K4me3	OK	0	0	0	0.04	0	0	0	0	0	0	0	0	0	0	0	0	0	0	0.25	0	0	0	0	0	0	0	0.1	0.52	0	0	0	0	0	0	0	0.17	0	0	0	0	0
Peak_1922	1	80241222	80241243	-	ENSBTAG00000010357	High	OK	OK	0.23	0	0	0.04	0	0.19	0.16	0.28	0	0	0.34	0	2.45	0	0	0	0	0.21	0	0	0	0	0	0	0	0	0	0	0	0.72	0	0	0	0	0	0	0	0.82	0	0	0
Peak_1923	1	80248828	80248915	-	ENSBTAG00000010357	High	OK	OK	0.23	0.99	0.42	0.04	0	0	0.16	0	1.28	0.32	0.17	1.36	0.49	0.23	1.3	1.08	0.78	5.04	14	3.64	5.72	0	0	0.18	0.4	11.25	8.3	31.2	1	11.4	1	15.54	0	0.74	0.58	0.17	0	0.41	0	0	0.27
Peak_1924	1	80260541	80260563	-	ENSBTAG00000010357	High	OK	OK	0	0	0	0	0	0	0	0	0	0	0	0	0	0	0	0	0	0	0	0	0	0	0	0	0	0	0	0	0	0	0	0	0	0	0	0	0	0	0	0	0
Peak_1925	1	80261064	80261085	-	ENSBTAG00000010357	High	OK	OK	0.69	0	0	0.04	0	0	0	0	0	0	0	0	0	0	0	0	0	0	0	0	0	0	0	0	0	0	0	0	0	0.12	0.5	0.37	0	0	0	0	0	0	0	0	0
Peak_1926	1	80267467	80267558	-	ENSBTAG00000010357	High	OK	OK	0	2.31	0	0.56	0	1.14	1.12	0.42	0	0.16	1.7	6.12	3.92	0	0	0	0	0.63	1.75	0.42	0.66	0	0	0	0	1.35	2.1	2.08	0.5	6.6	1.75	0.74	0.81	1.48	0	12.58	8.4	3.28	11.21	0	0
Peak_1927	1	80275997	80276047	-	ENSBTAG00000010357	High	OK	OK	0	0	0	0.04	0	0	0	0	0	0	0	0	0	0	0	0	0	0	0	0	0	0	0	0	0	0	0	0	0	0	0	0	0	0	0	0	0	0	0	0	0
Peak_1928	1	80284273	80284279	-	ENSBTAG00000010357	High	OK	OK	0	0	0	0	0	0	0	0	0	0	0	0	0	0	0	0	0	0	0	0	0	0	0	0	0	0	0	0	0.1	0	0	0	0	0	0	0	0	0	0	0	0
Peak_1929	1	80294637	80294661	-	ENSBTAG00000010357	High	OK	OK	0	0	0	0	0	0.19	0	0	0	0.32	0	0	0	0	0	0	0	0	0	0	0	0	0	0	0	0	0	0	0	0	0	0	0	0	0	0	0	0	0	0	0
Peak_1930	1	80302291	80302416	-	ENSBTAG00000010357	High	OK	OK	0.46	1.32	1.54	1.48	2.24	1.14	3.68	0.56	1.92	0	0.85	6.8	6.37	0.69	0	0	0.26	2.31	1.75	0.42	3.08	0	0	0	0.2	2.25	5.9	4.68	1.3	2.76	1.25	2.22	0.54	1.48	0.58	1.19	0.42	1.23	2.28	0	0.81
Peak_1931	1	80333085	80333097	-			OK	OK	0	0	0	0	0	0	0	0.14	0	0	0.68	0	0.49	0	0.26	0	0	0	0	0	0	0	0	0	0	0	0	0.26	0.2	0	0	0	0	0.74	0	0	0	0	0	0	0
Peak_1932	1	80346458	80346555	-	ENSBTAG00000010357	High	OK	OK	0	0.33	0.7	2.04	1.68	2.85	1.6	1.82	0.32	3.68	3.91	5.44	1.96	2.76	0.78	0.54	0.52	0.63	0.5	1.12	1.76	1.8	1.35	1.71	1	0.45	2.3	3.9	1.3	1.08	1.25	0.37	0.54	0.74	1.74	1.36	0	0.41	2.66	0.8	0
Peak_1933	1	80346700	80346749	-	ENSBTAG00000010357	Low	OK	OK	0	0	0	0.08	0	0	0	0.42	0	0.16	0.51	0	0	0.92	0.26	0	0.39	0	0.5	0	0	0.36	0.81	1.17	0.6	0	0.5	0	0	0	0	0	0	0	0	0	0	0	0	0	0.54
Peak_1934	1	80367174	80367203	-			OK	OK	0	0	0	0	0	0	0	0	0	0	0	0	0	0	0	0	0	0	0	0	0.22	0	0	0.54	0	0	0	0	0	0	0	0	0	0	0	0	0	0	0	0	0
Peak_1935	1	80411412	80411498	-			OK	OK	0	0	0	2.24	21	1.14	1.12	0	0	0	1.36	1.36	0.98	0	0	0	0	0	0	0	0.22	0	0	0	0	0	0	0	0	0	0	0	0	0	0	0	0	0	0	0	0
Peak_1936	1	80412113	80412124	-			OK	OK	0	0	0	0.56	1.96	0	0.32	0	0	0	0.51	0	0	0	0	0	0	0	0	0	0	0	0	0	0	0	0	0	0	0	0	0	0	0	0	0	0	0	0	0	0
Peak_1937	1	80413803	80413807	-			OK	OK	0	0	0	1.08	0.28	1.52	0.48	0	0	0	0.34	0	0.49	0	0	0	0	0	0	0	0	0	0	0	0	0	0	0	0	0	0	0	0	0	0	0	0	0	0	0	0
Peak_1938	1	80415577	80415730	-			OK	OK	0	0.11	0.14	5.08	13.16	2.66	5.76	0	0	0	1.87	4.76	1.47	0	0	0	0	0.42	0.25	0	0	0	0	0	0	0.45	0.3	0	0	0	0	0	0	0	0	0	0	0	0	0	0
Peak_1939	1	80418514	80418524	-			OK	OK	0	0	0	0.36	0.84	0	0.64	0	0	0	4.25	0	0.98	0	0	0	0	0	0	0	0	0	0	0	0	0	0	0	0	0	0	0	0	0	0	0	0	0	0	0	0
Peak_1940	1	80426402	80426678	-	ENSBTAG00000052213	High	OK	Likely_false	0	0	0	2.92	0.84	4.18	2.56	0	0	0	3.91	11.56	0.98	0	0	0	0	0	0	0	0.44	0	0	0	0	0	0.6	0	0	0	0	0	0	0	0	0	0	0.82	0	0	0
Peak_1941	1	80427017	80427116	-	ENSBTAG00000052213	High	OK	Likely_false	0	0	0	18.96	10.92	31.54	17.92	0	0	0	8.33	15.64	8.33	0	0	0	0	0	0.25	0	0.22	0	0	0	0	0.45	0	0	0	0	0	0	0	0.37	0	0	0	0	0	0	0
Peak_1942	1	80427543	80427789	-	ENSBTAG00000052213	High	OK	OK	0.23	5.94	7.84	2817.88	863.8	4431.18	4261.44	0.14	1.28	3.2	2287.18	8310.28	3163.93	0.23	0	0	0.26	35.49	18	3.36	86.9	0.72	0	0.18	0.1	60.3	13.6	25.48	0.3	0	0	0	38.34	15.17	6.09	5.95	5.88	4.92	0	0	0.81
Peak_1943	1	80452816	80452874	-	ENSBTAG00000052213	Low	OK	Likely_false	0	0	0	0.16	0	0	0.32	0.28	0.32	0	1.36	0.68	0	0.46	0	1.08	0	0	0	0.28	0	0.72	2.43	1.98	1.8	0	0.1	1.04	0.2	0.36	0	0	0.27	0	0	0.34	0	0.41	0.57	0.2	0.27
Peak_1944	1	80452868	80452962	+	ENSBTAG00000014727	High	OK	OK	13.11	7.04	7.98	6.32	0.56	6.65	8.16	8.82	2.88	8.48	6.63	14.28	4.9	14.95	4.94	11.88	3.64	11.97	8.5	5.32	11.22	20.52	11.34	13.05	13.6	13.5	7.9	21.32	11	6	3.5	5.18	7.56	7.4	4.35	11.05	8.82	11.89	4.56	4	1.62
Peak_1945	1	80468195	80468212	-	ENSBTAG00000014724	High	Low_H3K4me3	OK	4.6	0.66	0.7	3.6	4.48	6.46	0.64	5.32	1.6	21.92	4.25	1.36	2.45	18.86	2.34	36.72	2.47	2.52	2.25	0.7	1.32	8.64	1.35	22.5	18.9	2.7	1.6	17.68	0.4	0.12	0.5	0	1.89	7.77	2.32	6.29	0	6.97	16.91	5.8	2.43
Peak_1946	1	80469269	80469316	-	ENSBTAG00000014724	Medium	OK	OK	0.23	0	0	0.12	0	0	0	0	0	0	0	0	0	0	0	0	0	0	0	0.42	0.22	0	0	0	0.3	0.9	0.3	0	0.1	0.12	0	0	1.08	0	0	0.17	0	0	0	0	0
Peak_1947	1	80470204	80470216	-	ENSBTAG00000014724	Low	OK	OK	0.69	0.66	0.84	0	0	0	0.16	0.14	0.32	0.16	0	0	0	0	0	0	0.13	0.63	0	0.28	0.22	0	0	0.27	0.1	0	1.1	0.26	3.8	1.8	0.75	1.11	0	0	0.29	0	0	0.41	0	0	0
Peak_1948	1	80473209	80473240	+			OK	OK	0	0	0	0.04	0	0	0	0	0	0	0	0	0	0.23	0	0	0.13	0	0	0	0	1.08	2.43	1.17	1.1	0	0	0	0	0	0	0	0	0	0	0	0	0	0	0	0.54
Peak_1949	1	80473703	80473803	-	ENSBTAG00000014724	High	OK	OK	52.44	54.23	33.74	92.8	26.88	98.23	163.36	288.82	68.8	313.6	112.37	168.64	84.77	558.9	269.36	190.08	115.96	176.4	129.75	38.92	146.96	484.56	507.06	676.98	515.2	100.8	81.2	109.98	54.6	80.16	8.75	27.38	181.71	123.58	283.62	198.05	253.68	169.33	175.56	51.6	102.33
Peak_1950	1	80473824	80473836	+			OK	OK	0	0	0	0	0	0	0	0	0	0	0	0	0	0	0	0	0	0	0	0	0	0.36	0.81	0	0.1	0	0.1	0	0	0	0	0	0	0	0	0	0	0	0	0	0
Peak_1951	1	80473971	80474003	-	ENSBTAG00000014724	High	OK	OK	0	0	0.14	0.04	0	0	0	0.98	0	0.8	0.34	0	0	1.15	2.6	0	0.52	0.63	0.5	0.14	0.44	1.08	2.43	2.43	2.8	0.45	0.2	0.26	0	0	0	0	0.27	0	0	0	0.84	0.41	0.57	0.4	0.54
Peak_1952	1	80473987	80474112	+			OK	OK	7.82	5.06	5.46	0.24	0	0.95	0.8	0.98	1.28	1.6	1.87	5.44	5.39	1.15	0	1.62	1.82	5.88	8	0.98	6.82	25.2	17.55	1.98	17.7	9.9	5.2	9.1	1	2.16	2.25	2.59	0.27	0	2.03	1.36	5.46	2.46	1.71	5	3.78
Peak_1953	1	80491826	80491967	+			OK	OK	0	0	0	0	0	0	0	0	0	0	0	0	0	0.69	2.34	0	0.65	0	0	0	0	0.36	2.43	0.36	0.1	0	0.1	0.26	0	0	0	0	0	0	0	0	0	0	0	1.4	4.05
Peak_1954	1	80506350	80506420	+			OK	OK	1.84	0.66	2.52	0	0	0	0	0	0	0	0	0	0	0	0	0	0	0.21	0.75	0.42	1.1	0	0	0	0	1.35	1.5	3.12	3.5	3.24	1	0.74	0	0	0	0	0	0	0	0.6	0
Peak_1955	1	80508962	80509020	-	ENSBTAG00000005122	High	Low_H3K4me3	Likely_false	0	0	0	0	0	0	0	0	0	0	0	0	0	0	0	0	0	0	0	0	0	0	0	0	0	0	0	0	0	0	0	0	0	0	0	0	0	0	0	0	0
Peak_1956	1	80530684	80530800	-	ENSBTAG00000005122	High	OK	OK	0	0.11	0	0	0	0	0.16	0	0	0	0	0	0	0	0.26	0	0	0	0.25	0	0.88	0.36	0	0	0.1	0	0	1.3	3.9	2.04	0.5	2.22	0	0	0	0	0	0	0	0	0
[truncated: 93,855 more rows]
[truncated: 64 more columns]
