# Supplementary material for: Transcription initiation mapping in 31 bovine tissues reveals complex promoter activity, pervasive transcription, and tissue-specific promoter usage
Source: HighWire-hosted journal article supplement (doi:10.1101/gr.267336.120), 2021-03-15
Supplement: Supplemental_Table_S3.xlsx [file Supplemental_Table_S3.xlsx]

## Sheet: Sheet2
Supplemental Table S3. Genic TSCs and their corresponding co-expression modules.
RAMPAGE peak	Chromosome	Start	End	Strand	Co-expression module
Peak_5	1	644352	644519	+	testis
Peak_7	1	821234	821281	-	abomasum
Peak_18	1	990844	991050	+	pre-stomach
Peak_20	1	1040321	1040331	+	heart
Peak_21	1	1040481	1040544	+	heart
Peak_22	1	1100116	1100147	-	testis
Peak_26	1	1131748	1131797	-	testis
Peak_28	1	1132838	1132878	-	abomasum
Peak_32	1	1396233	1396246	-	ileum-2
Peak_36	1	1402325	1402328	-	testis
Peak_46	1	1455113	1455229	-	testis
Peak_48	1	1467411	1467602	-	intestines
Peak_68	1	1907822	1907912	-	liver
Peak_70	1	1909039	1909099	+	testis
Peak_82	1	1984815	1984846	-	brain
Peak_84	1	1985238	1985347	+	testis
Peak_86	1	1986031	1986122	+	liver
Peak_89	1	2027565	2027670	+	testis
Peak_90	1	2027818	2027995	+	testis
Peak_92	1	2046649	2046758	+	pre-stomach
Peak_113	1	2218225	2218399	-	intestines
Peak_124	1	2316256	2316281	-	liver
Peak_126	1	2350007	2350181	-	intestines
Peak_128	1	2381018	2381053	-	lung
Peak_131	1	2549126	2549198	-	brain
Peak_141	1	2827793	2828182	+	brain
Peak_142	1	2828848	2828958	+	intestines
Peak_147	1	2895884	2895896	+	brain cortex-2
Peak_158	1	2923941	2924223	+	testis
Peak_160	1	2924701	2924863	+	thymus-1
Peak_168	1	3150647	3150657	+	esophagus-heart-muscle
Peak_171	1	3197373	3197395	-	liver
Peak_176	1	3520493	3520546	-	kidney-3
Peak_177	1	3529470	3529492	-	testis
Peak_191	1	4192132	4192259	+	pre-stomach
Peak_192	1	4270956	4271044	+	cerebellum-3
Peak_194	1	4272377	4272415	+	brain
Peak_196	1	4351902	4351921	+	thymus-1
Peak_197	1	4357741	4357830	+	thymus-1
Peak_198	1	4380965	4381187	+	brain
Peak_200	1	4429405	4429479	+	skin
Peak_201	1	4430518	4430526	+	cerebellum-3
Peak_203	1	4673596	4673622	+	skin
Peak_204	1	4736824	4736830	+	skin
Peak_205	1	4759916	4759945	+	skin
Peak_208	1	4845631	4845653	-	skin
Peak_210	1	4868467	4868479	-	skin
Peak_211	1	4878252	4878272	+	skin
Peak_213	1	4913750	4913762	+	skin
Peak_214	1	4926082	4926092	-	skin
Peak_216	1	4957891	4957906	-	skin
Peak_220	1	5184109	5184151	-	skin
Peak_221	1	5195353	5195378	-	skin
Peak_226	1	5448205	5448209	+	skin
Peak_235	1	5689899	5689913	+	skin
Peak_236	1	5770094	5770268	+	kidney-3
Peak_237	1	5829920	5829952	+	pre-stomach
Peak_240	1	6111845	6111872	+	brain
Peak_241	1	6112067	6112158	+	brain
Peak_252	1	7113985	7114104	-	hypothalamus
Peak_253	1	7114136	7114254	+	testis
Peak_254	1	7154908	7154986	-	testis
Peak_259	1	7159016	7159103	+	testis
Peak_260	1	7159257	7159330	-	testis
Peak_262	1	7183789	7183897	+	testis
Peak_265	1	7280832	7280876	-	testis
Peak_268	1	8918058	8918065	+	thymus-1
Peak_320	1	10665254	10665266	-	heart
Peak_330	1	10811675	10811743	+	testis
Peak_331	1	10823211	10823354	+	testis
Peak_335	1	11580797	11580809	+	testis
Peak_345	1	15883083	15883277	-	brain
Peak_353	1	19088001	19088027	+	testis
Peak_354	1	19227524	19227661	+	testis
Peak_356	1	19227839	19228126	+	testis
Peak_358	1	19228915	19228921	+	testis
Peak_363	1	19502303	19502607	-	liver
Peak_388	1	20582078	20582092	-	ovary
Peak_401	1	20969761	20969770	-	hypothalamus
Peak_402	1	20972389	20972416	-	cerebellum-3
Peak_404	1	20975377	20975393	-	cerebellum-3
Peak_405	1	20975705	20975910	-	cerebellum-3
Peak_415	1	21224004	21224039	-	esophagus-muscle
Peak_438	1	22172202	22172212	+	skin
Peak_447	1	22617432	22617543	+	intestines
Peak_448	1	22639264	22639330	+	intestines
Peak_451	1	22783867	22783956	+	testis
Peak_452	1	22906429	22906540	-	brain
Peak_453	1	22966650	22966667	+	testis
Peak_454	1	22966802	22966883	-	testis
Peak_464	1	24527180	24527203	+	testis
Peak_477	1	25063419	25063420	+	brain
Peak_485	1	26139167	26139182	-	skin
Peak_495	1	26583481	26583494	-	skin
Peak_496	1	26584104	26584279	-	liver
Peak_510	1	29211661	29211671	-	skin
Peak_512	1	29351787	29351798	-	cerebellum-3
Peak_515	1	29403354	29403378	-	esophagus-muscle
Peak_523	1	32826934	32827213	+	brain
Peak_542	1	33879234	33879256	+	esophagus
Peak_547	1	35360637	35360654	+	pre-stomach
Peak_551	1	35867166	35867228	+	cerebellum-3
Peak_554	1	36018319	36018384	+	thymus-1
Peak_560	1	36103887	36103910	+	testis
Peak_573	1	36352493	36352548	+	testis
Peak_580	1	38211730	38211748	-	liver
Peak_581	1	38267166	38267309	-	testis
Peak_583	1	38275491	38275774	+	testis
Peak_590	1	38419278	38419291	+	brain
Peak_592	1	40974814	40974921	+	brain
Peak_596	1	42010512	42010757	+	brain
Peak_604	1	42127485	42127536	+	testis
Peak_608	1	42206263	42206277	-	intestines
Peak_609	1	42230700	42230818	-	brain
Peak_612	1	42486111	42486125	+	esophagus-muscle
Peak_613	1	42829972	42830133	-	testis
Peak_620	1	43023837	43024047	+	intestines
Peak_621	1	43024274	43024289	+	esophagus-muscle
Peak_623	1	43024446	43024457	+	liver
Peak_629	1	43059487	43059572	+	intestines
Peak_631	1	43108648	43108651	+	heart
Peak_633	1	43116697	43116710	-	liver
Peak_635	1	43195055	43195149	-	testis
Peak_641	1	44071452	44071469	+	skin
Peak_642	1	44085901	44086012	+	testis
Peak_647	1	44140356	44140375	+	abomasum
Peak_655	1	44402014	44402052	+	esophagus-muscle
Peak_657	1	44483388	44483472	+	testis
Peak_658	1	44483881	44483911	+	abomasum
Peak_661	1	44588462	44588521	+	testis
Peak_664	1	44617557	44617640	+	liver
Peak_665	1	44636670	44636676	+	liver
Peak_669	1	44674109	44674124	-	pre-stomach
Peak_671	1	44687322	44687490	-	testis
Peak_672	1	44687391	44687485	+	testis
Peak_673	1	44687938	44688085	-	esophagus-heart-muscle
Peak_674	1	44688128	44688157	+	brain
Peak_675	1	44688330	44688404	-	testis
Peak_676	1	44688472	44688571	+	liver
Peak_677	1	44688773	44688794	-	testis
Peak_679	1	44714461	44714767	+	heart
Peak_681	1	44751241	44751324	+	skin
Peak_684	1	44979439	44979485	+	abomasum
Peak_685	1	45028138	45028152	+	skin
Peak_686	1	45057842	45057857	+	testis
Peak_687	1	45082025	45082145	+	intestines
Peak_689	1	45090250	45090272	+	intestines
Peak_692	1	45155917	45156221	+	testis
Peak_701	1	45309611	45309612	-	ovary
Peak_705	1	45717608	45717616	-	kidney-3
Peak_713	1	45962981	45963040	+	testis
Peak_714	1	45988166	45988243	-	intestines
Peak_716	1	46001750	46001751	-	thymus-2
Peak_717	1	46001880	46002035	+	brain
Peak_727	1	46067023	46067078	+	testis
Peak_728	1	46077284	46077386	+	brain
Peak_733	1	46110689	46110759	+	brain
Peak_734	1	46110944	46110956	+	testis
Peak_740	1	46190063	46190130	+	pre-stomach
Peak_769	1	50481082	50481391	-	intestines
Peak_770	1	50691578	50691606	-	kidney-4
Peak_776	1	51788533	51788623	+	abomasum
Peak_784	1	52133872	52133911	+	testis
Peak_793	1	52189619	52189753	+	brain
Peak_797	1	52214252	52214318	+	intestines
Peak_801	1	52276023	52276040	+	abomasum
Peak_823	1	52716270	52716282	-	skin
Peak_830	1	52777931	52777939	-	brain cortex-2
Peak_835	1	52998626	52998717	+	intestines
Peak_838	1	53338552	53338821	-	intestines
Peak_839	1	53338624	53338887	+	brain
Peak_840	1	53339259	53339272	-	cerebellulm-2
Peak_845	1	53578629	53578866	+	intestines
Peak_859	1	55892951	55892975	-	testis
Peak_861	1	55893899	55894039	+	testis
Peak_870	1	56486615	56486730	+	liver
Peak_880	1	56657972	56657980	+	esophagus-muscle
Peak_885	1	56759158	56759508	+	brain
Peak_886	1	56759669	56759861	+	brain
Peak_889	1	56882868	56883017	+	intestines
Peak_891	1	56933918	56933944	-	ileum-2
Peak_894	1	57065499	57065593	-	thymus-1
Peak_895	1	57065871	57065945	-	testis
Peak_897	1	57075207	57075230	+	liver
Peak_898	1	57076850	57076968	+	intestines
Peak_902	1	57105571	57105582	+	thymus-1
Peak_907	1	57261623	57261738	-	intestines
Peak_914	1	57343027	57343036	-	brain cortex-2
Peak_915	1	57343376	57343727	-	testis
Peak_917	1	57344024	57344076	-	brain
Peak_919	1	57344499	57344506	-	testis
Peak_932	1	57428417	57428419	-	isthmus
Peak_937	1	57596774	57596797	-	heart
Peak_938	1	57599442	57599576	-	intestines
Peak_945	1	57740912	57741006	-	testis
Peak_946	1	57799302	57799344	-	testis
Peak_948	1	57943445	57943464	+	skin
Peak_951	1	58136552	58136624	-	testis
Peak_953	1	58176516	58176542	-	lung
Peak_954	1	58199647	58199684	-	testis
Peak_958	1	58218718	58218935	+	brain
Peak_959	1	58220324	58220338	-	trachea
Peak_967	1	58362329	58362342	-	brain
Peak_970	1	58391902	58392069	-	liver
Peak_982	1	58491054	58491070	+	testis
Peak_986	1	58576326	58576375	+	pre-stomach
Peak_988	1	58619305	58619352	+	testis
Peak_989	1	58670721	58670752	-	lung
Peak_992	1	58735281	58735373	+	testis
Peak_993	1	58926810	58926886	+	intestines
Peak_1016	1	59003677	59003714	-	testis
Peak_1026	1	59100510	59100588	-	brain
Peak_1027	1	59102482	59102591	-	brain
Peak_1032	1	59107245	59107437	-	brain
Peak_1051	1	59232597	59232636	-	ileum-2
Peak_1066	1	59279458	59279481	-	skin
Peak_1086	1	59425614	59425946	-	liver
Peak_1099	1	59550580	59550648	-	kidney-3
Peak_1118	1	59770479	59770548	-	brain
Peak_1132	1	60306483	60306502	+	brain cortex-2
Peak_1133	1	60306676	60306781	+	brain
Peak_1145	1	61192197	61192370	-	brain
Peak_1147	1	62877669	62877779	-	cerebellum-1
Peak_1152	1	63870958	63871019	-	brain
Peak_1155	1	63957168	63957169	-	testis
Peak_1158	1	63981577	63981726	+	ovary
Peak_1162	1	64049953	64050079	-	testis
Peak_1179	1	64201688	64201713	+	testis
Peak_1186	1	64246525	64246587	-	testis
Peak_1188	1	64246991	64247005	-	liver
Peak_1193	1	64325049	64325181	-	intestines
Peak_1207	1	64414831	64414861	-	esophagus-muscle
Peak_1210	1	64432861	64432951	-	esophagus-heart-muscle
Peak_1215	1	64606525	64606721	+	intestines
Peak_1221	1	64691766	64691783	-	testis
Peak_1237	1	64862417	64862507	-	lung
Peak_1240	1	64928324	64928348	-	testis
Peak_1249	1	65096589	65096718	-	liver
Peak_1263	1	65418310	65418327	+	testis
Peak_1264	1	65433687	65433711	+	testis
Peak_1265	1	65433949	65434003	-	testis
Peak_1267	1	65434443	65434480	-	testis
Peak_1268	1	65434505	65434516	+	testis
Peak_1270	1	65505956	65505971	+	kidney-2
Peak_1272	1	65607540	65607656	+	brain
Peak_1273	1	65608109	65608183	+	brain
Peak_1283	1	66092620	66092645	+	esophagus-heart-muscle
Peak_1284	1	66092684	66092713	-	kidney-3
Peak_1287	1	66145638	66145792	-	intestines
Peak_1291	1	66169664	66169677	-	testis
Peak_1293	1	66181060	66181075	-	intestines
Peak_1299	1	66226021	66226033	-	intestines
Peak_1305	1	66293880	66294006	-	testis
Peak_1306	1	66294040	66294163	+	intestines
Peak_1312	1	66517213	66517323	-	intestines
Peak_1314	1	66564878	66564970	+	ileum-2
Peak_1315	1	66565634	66565696	-	ileum-2
Peak_1320	1	66655923	66655933	-	kidney-2
Peak_1321	1	66655968	66656057	+	kidney-4
Peak_1325	1	66804996	66805117	-	intestines
Peak_1326	1	66819060	66819128	-	esophagus-heart-muscle
Peak_1327	1	66820109	66820143	-	testis
Peak_1328	1	66820167	66820362	+	esophagus-heart-muscle
Peak_1340	1	66987962	66988239	+	intestines
Peak_1344	1	67012204	67012324	+	intestines
Peak_1347	1	67032076	67032084	+	intestines
Peak_1350	1	67120207	67120293	-	testis
Peak_1354	1	67134428	67134443	+	cerebellum-3
Peak_1358	1	67411394	67411530	+	testis
Peak_1359	1	67478166	67478212	+	liver
Peak_1361	1	67555359	67555445	+	pre-stomach
Peak_1376	1	67939379	67939388	-	liver
Peak_1378	1	67952601	67952691	-	liver
Peak_1400	1	68177497	68177509	-	skin
Peak_1401	1	68260015	68260101	-	testis
Peak_1402	1	68332269	68332552	-	testis
Peak_1418	1	68595739	68595816	+	testis
Peak_1419	1	68624100	68624122	+	testis
Peak_1421	1	68796791	68796814	+	cerebellum-3
Peak_1423	1	68912132	68912160	+	thymus-1
Peak_1424	1	68925462	68925479	+	testis
Peak_1431	1	69127769	69127865	+	intestines
Peak_1438	1	69283899	69283904	-	testis
Peak_1441	1	69335427	69335589	-	intestines
Peak_1442	1	69348459	69348473	-	intestines
Peak_1444	1	69357396	69357411	-	intestines
Peak_1460	1	69812534	69812666	-	esophagus-heart-muscle
Peak_1469	1	69946567	69946673	-	testis
Peak_1476	1	70172174	70172222	-	testis
Peak_1482	1	70212373	70212388	+	lung
Peak_1489	1	70342566	70342787	-	testis
Peak_1491	1	70371974	70371987	-	testis
Peak_1493	1	70372275	70372281	+	testis
Peak_1495	1	70372688	70372881	+	brain
Peak_1497	1	70384549	70384768	+	brain
Peak_1502	1	70425485	70425499	+	pre-stomach
Peak_1504	1	70460146	70460302	+	kidney-3
Peak_1505	1	70462219	70462269	+	liver
Peak_1506	1	70467364	70467365	+	pre-stomach
Peak_1511	1	70622921	70623001	-	brain
Peak_1518	1	70679292	70679331	-	esophagus-heart-muscle
Peak_1519	1	70679860	70680153	-	esophagus-heart-muscle
Peak_1535	1	70799416	70799549	-	liver
Peak_1536	1	70802125	70802158	-	testis
Peak_1538	1	70809627	70809710	+	intestines
Peak_1542	1	70877332	70877451	-	testis
Peak_1544	1	70877869	70877932	-	testis
Peak_1546	1	70908941	70908992	-	testis
Peak_1548	1	70909359	70909524	-	brain
Peak_1558	1	70987358	70987484	-	testis
Peak_1560	1	71021483	71021592	-	testis
Peak_1566	1	71100769	71100826	+	testis
Peak_1569	1	71155739	71155916	+	thymus-1
Peak_1572	1	71175283	71175290	+	ileum-2
Peak_1585	1	71355772	71355920	+	brain
Peak_1587	1	71410647	71410820	+	testis
Peak_1589	1	71440152	71440197	-	brain
Peak_1590	1	71440617	71440690	-	brain
Peak_1601	1	71735792	71735802	-	brain cortex-2
Peak_1605	1	71781472	71781531	-	pre-stomach
Peak_1608	1	71782150	71782347	-	pre-stomach
Peak_1613	1	71999243	71999261	-	testis
Peak_1618	1	72061687	72061807	-	esophagus-muscle
Peak_1619	1	72062032	72062346	+	brain
Peak_1620	1	72065484	72065494	+	kidney-3
Peak_1626	1	72100060	72100307	+	esophagus-muscle
Peak_1627	1	72100645	72100669	+	testis
Peak_1635	1	72307247	72307260	+	testis
Peak_1641	1	72337367	72337405	+	testis
Peak_1649	1	72877178	72877203	+	testis
Peak_1652	1	72899189	72899198	+	abomasum
Peak_1660	1	73048117	73048159	+	liver
Peak_1661	1	73048465	73048568	+	testis
Peak_1665	1	73063271	73063361	+	brain
Peak_1668	1	73092239	73092251	+	thymus-1
Peak_1675	1	73124180	73124220	+	testis
Peak_1683	1	73178747	73178848	+	liver
Peak_1685	1	73254081	73254099	+	isthmus
Peak_1699	1	73856321	73856425	-	brain
Peak_1701	1	73893271	73893565	+	brain
Peak_1706	1	74182627	74182704	-	testis
Peak_1708	1	74183396	74183548	-	esophagus-heart-muscle
Peak_1717	1	74675737	74675837	+	brain
Peak_1728	1	75004282	75004313	+	liver
Peak_1729	1	75005023	75005105	+	liver
Peak_1739	1	75996123	75996139	-	ileum-2
Peak_1752	1	76722429	76722458	-	liver
Peak_1754	1	76794837	76794952	+	kidney-4
Peak_1755	1	76869573	76869590	-	kidney-3
Peak_1759	1	77130182	77130275	+	testis
Peak_1767	1	77416047	77416154	-	pre-stomach
Peak_1772	1	77460473	77460483	-	thymus-1
Peak_1776	1	77479655	77479675	-	pre-stomach
Peak_1778	1	77498547	77498590	-	pre-stomach
Peak_1779	1	77687529	77687672	-	esophagus-muscle
Peak_1780	1	77688683	77688728	-	esophagus-muscle
Peak_1782	1	77712163	77712177	-	testis
Peak_1787	1	78370716	78370826	-	skin
Peak_1836	1	78935454	78935579	-	brain cortex-2
Peak_1850	1	79109963	79110007	-	adipose-2
Peak_1861	1	79155957	79156013	-	thymus-1
Peak_1863	1	79167560	79167666	-	thymus-1
Peak_1865	1	79188566	79188594	-	thymus-1
Peak_1873	1	79205502	79205517	-	testis
Peak_1884	1	79362417	79362478	+	ileum-2
Peak_1897	1	79586718	79586726	+	pre-stomach
Peak_1907	1	79657897	79658072	+	intestines
Peak_1910	1	80006017	80006032	+	liver
Peak_1922	1	80241222	80241243	-	mammary gland
Peak_1926	1	80267467	80267558	-	liver
Peak_1929	1	80294637	80294661	-	liver
Peak_1930	1	80302291	80302416	-	intestines
Peak_1933	1	80346700	80346749	-	cerebellum-1
Peak_1949	1	80473703	80473803	-	esophagus-heart-muscle
Peak_1951	1	80473971	80474003	-	brain
Peak_1955	1	80508962	80509020	-	liver
Peak_1956	1	80530684	80530800	-	liver
Peak_1958	1	80576085	80576229	-	liver
Peak_1964	1	80618798	80618847	-	liver
Peak_1968	1	80661832	80662000	-	testis
Peak_1969	1	80662324	80662448	+	testis
Peak_1970	1	80665594	80665675	-	testis
Peak_1971	1	80665680	80665826	+	testis
Peak_1972	1	80674791	80674794	+	esophagus
Peak_1975	1	80711538	80711549	-	liver
Peak_1976	1	80873581	80873747	+	brain
Peak_1979	1	81041129	81041143	+	kidney-3
Peak_1981	1	81058743	81058760	+	brain
Peak_1984	1	81135219	81135330	+	brain
Peak_1985	1	81175734	81175735	+	lung
Peak_1987	1	81273915	81273931	-	pre-stomach
Peak_1988	1	81288116	81288286	+	testis
Peak_1997	1	81305256	81305281	+	testis
Peak_1998	1	81306172	81306185	+	testis
Peak_2005	1	81606141	81606157	-	testis
Peak_2006	1	81621118	81621366	-	testis
Peak_2007	1	81622347	81622371	-	kidney-3
Peak_2008	1	81636661	81636790	+	pre-stomach
Peak_2012	1	81727329	81727392	-	testis
Peak_2014	1	81735921	81735930	-	brain
Peak_2018	1	81836840	81836920	-	liver
Peak_2019	1	81865379	81865394	-	testis
Peak_2023	1	81983995	81984177	+	brain
Peak_2026	1	81997800	81997879	+	ileum-2
Peak_2030	1	82086922	82086937	+	testis
Peak_2032	1	82125189	82125233	-	testis
Peak_2034	1	82293185	82293251	-	testis
Peak_2042	1	82499547	82499649	+	brain
Peak_2048	1	82704633	82704638	+	skin
Peak_2050	1	82813029	82813063	-	liver
Peak_2051	1	82815118	82815142	-	liver
Peak_2053	1	82820779	82820785	+	liver
Peak_2058	1	82851415	82851463	-	brain cortex-2
Peak_2063	1	82871195	82871291	-	liver
Peak_2065	1	82872613	82872789	-	pre-stomach
Peak_2068	1	82888180	82888295	-	testis
Peak_2070	1	82908991	82909003	-	brain
Peak_2072	1	82909667	82909684	-	cerebellum-3
Peak_2077	1	82933745	82933831	-	brain
Peak_2080	1	82968169	82968294	-	esophagus-heart-muscle
Peak_2084	1	82977212	82977226	-	liver
Peak_2100	1	83122820	83122921	+	brain
Peak_2101	1	83124675	83124951	+	liver
Peak_2104	1	83149143	83149144	+	skin
Peak_2115	1	83304498	83304598	+	brain
Peak_2121	1	83419536	83419548	+	pre-stomach
Peak_2124	1	83449298	83449355	-	heart
Peak_2137	1	83653504	83653644	+	brain
Peak_2141	1	83725109	83725125	+	kidney-4
Peak_2145	1	83826174	83826228	-	thymus-1
Peak_2149	1	83894639	83894654	+	ileum-1
Peak_2151	1	83918790	83918823	+	thymus-1
Peak_2153	1	83922131	83922336	+	intestines
Peak_2154	1	83928813	83928828	+	lung
Peak_2162	1	84044068	84044155	+	testis
Peak_2163	1	84047418	84047716	+	esophagus-heart-muscle
Peak_2164	1	84048040	84048052	+	testis
Peak_2165	1	84050667	84050681	+	heart
Peak_2169	1	84059119	84059140	+	esophagus-heart-muscle
Peak_2176	1	84226082	84226096	-	testis
Peak_2191	1	85315433	85315499	+	brain
Peak_2192	1	85316453	85316651	-	brain
Peak_2193	1	85320424	85320583	+	brain
Peak_2195	1	85410518	85410557	-	brain
Peak_2197	1	86035349	86035550	+	esophagus-heart-muscle
Peak_2198	1	86055250	86055343	-	testis
Peak_2199	1	86071996	86072009	-	kidney-3
Peak_2200	1	86072328	86072334	-	kidney-3
Peak_2203	1	86120938	86120982	-	testis
Peak_2205	1	86318721	86318813	+	testis
Peak_2211	1	86399365	86399395	-	testis
Peak_2213	1	87028563	87028728	+	thymus-1
Peak_2225	1	87437959	87437987	-	testis
Peak_2227	1	87480912	87480926	-	heart
Peak_2231	1	87518597	87518790	-	esophagus-heart-muscle
Peak_2232	1	87518781	87518861	+	esophagus-heart-muscle
Peak_2236	1	87647459	87647472	+	brain
Peak_2239	1	87721447	87721461	-	testis
Peak_2241	1	87737600	87737615	-	testis
Peak_2245	1	87764790	87764932	-	esophagus-heart-muscle
Peak_2249	1	87793406	87793497	+	pre-stomach
Peak_2250	1	87793680	87793817	+	abomasum
Peak_2261	1	87963744	87963856	-	brain
Peak_2272	1	88395318	88395332	-	esophagus-muscle
Peak_2273	1	88407916	88407997	-	testis
Peak_2277	1	88670476	88670554	-	brain
Peak_2278	1	88671334	88671404	-	testis
Peak_2288	1	90026131	90026151	+	pre-stomach
Peak_2290	1	90030016	90030227	+	thymus-1
Peak_2292	1	90030886	90030981	+	thymus-1
Peak_2341	1	92559223	92559411	-	intestines
Peak_2364	1	94100034	94100116	-	brain
Peak_2365	1	94101671	94101851	-	brain
Peak_2376	1	94985805	94985829	+	pre-stomach
Peak_2392	1	95325303	95325322	-	testis
Peak_2403	1	95392205	95392231	-	testis
Peak_2411	1	95459473	95459481	-	testis
Peak_2415	1	95478063	95478114	-	ovary
Peak_2427	1	95687298	95687406	+	pre-stomach
Peak_2428	1	95742749	95742754	+	pre-stomach
Peak_2432	1	95801481	95801502	+	liver
Peak_2438	1	95889266	95889337	+	testis
Peak_2439	1	95903895	95903909	+	skin
Peak_2458	1	96452873	96452931	+	liver
Peak_2459	1	96540975	96541081	+	brain
Peak_2461	1	96865015	96865076	+	brain
Peak_2472	1	97163167	97163362	-	pre-stomach
Peak_2485	1	97350288	97350356	-	testis
Peak_2487	1	97350964	97351123	-	testis
Peak_2493	1	97421606	97421721	-	brain
Peak_2506	1	97604114	97604160	-	testis
Peak_2512	1	97692763	97692782	+	pre-stomach
Peak_2547	1	98075248	98075306	+	pre-stomach
Peak_2549	1	98088265	98088296	+	lung
Peak_2559	1	98136249	98136284	+	intestines
Peak_2565	1	98279921	98280044	+	intestines
Peak_2580	1	99361464	99361542	+	liver
Peak_2582	1	99361816	99361829	+	liver
Peak_2583	1	99361975	99362167	+	testis
Peak_2594	1	99743526	99743609	-	brain
Peak_2595	1	99743625	99743692	+	kidney-4
Peak_2596	1	99744262	99744435	+	testis
Peak_2598	1	99770364	99770393	+	testis
Peak_2600	1	99995812	99995836	+	adipose-2
Peak_2601	1	100081573	100081662	+	testis
Peak_2602	1	100098885	100098905	+	testis
Peak_2603	1	100102272	100102427	+	testis
Peak_2608	1	101522706	101522797	+	intestines
Peak_2609	1	101542595	101542608	+	ovary
Peak_2613	1	102182421	102182564	+	cerebellum-3
Peak_2614	1	102267976	102268050	+	intestines
Peak_2621	1	106026795	106026956	+	brain cortex-2
Peak_2628	1	106186520	106186637	-	testis
Peak_2639	1	106578580	106578594	-	testis
Peak_2640	1	106587250	106587280	-	testis
Peak_2642	1	106625461	106625504	-	esophagus-heart-muscle
Peak_2673	1	107058196	107058210	-	testis
Peak_2676	1	107073466	107073485	-	thymus-2
Peak_2678	1	107077224	107077310	+	testis
Peak_2679	1	107078572	107078641	-	intestines
Peak_2680	1	107078699	107078738	+	testis
Peak_2688	1	107426192	107426207	+	testis
Peak_2692	1	107602248	107602321	-	testis
Peak_2693	1	107602556	107602605	-	esophagus-muscle
Peak_2702	1	108215272	108215282	-	brain cortex-1
Peak_2708	1	108828510	108828554	+	ileum-2
Peak_2711	1	108866940	108866955	-	testis
Peak_2715	1	108903111	108903192	-	esophagus-heart-muscle
Peak_2725	1	109399775	109399795	-	testis
Peak_2727	1	109413712	109413830	-	testis
Peak_2728	1	109418001	109418035	-	skin
Peak_2738	1	110448046	110448073	+	liver
Peak_2742	1	110449297	110449321	+	testis
Peak_2743	1	110454732	110454830	+	lung
Peak_2749	1	110779835	110779944	-	testis
Peak_2765	1	111179264	111179281	-	kidney-3
Peak_2766	1	111208000	111208039	-	testis
Peak_2768	1	111407603	111407686	-	brain
Peak_2770	1	111408300	111408308	-	brain cortex-2
Peak_2780	1	111804769	111804793	-	testis
Peak_2782	1	111829227	111829318	+	liver
Peak_2784	1	111876341	111876398	+	brain
Peak_2792	1	112320544	112320576	+	kidney-3
Peak_2793	1	112338197	112338259	+	esophagus-muscle
Peak_2794	1	112365890	112365943	+	esophagus-muscle
Peak_2802	1	113326525	113326635	+	testis
Peak_2805	1	113344700	113344719	+	abomasum
Peak_2814	1	114498689	114498775	-	thymus-1
Peak_2822	1	114910304	114910399	-	esophagus-muscle
Peak_2824	1	114919163	114919202	-	testis
Peak_2837	1	115321542	115321789	-	ileum-1
Peak_2845	1	115376513	115376550	-	esophagus-muscle
Peak_2887	1	115465479	115465493	-	testis
Peak_2897	1	115495742	115495876	-	esophagus-heart-muscle
Peak_2900	1	115524899	115525005	-	intestines
Peak_2905	1	116049959	116050082	-	liver
Peak_2911	1	116319550	116319582	-	testis
Peak_2923	1	116781506	116781576	+	testis
Peak_2926	1	116814656	116814692	+	liver
Peak_2927	1	116814832	116814890	+	intestines
Peak_2932	1	116891744	116891805	+	intestines
Peak_2933	1	116921197	116921224	-	testis
Peak_2934	1	117016125	117016194	-	thymus-1
Peak_2935	1	117016962	117016978	-	brain
Peak_2945	1	117433143	117433301	+	testis
Peak_2951	1	117537508	117537627	-	brain
Peak_2983	1	118213310	118213411	+	brain
Peak_2993	1	118350009	118350102	-	liver
Peak_2997	1	118403782	118403871	+	brain
Peak_2998	1	118460783	118460849	+	kidney-3
Peak_3012	1	118690667	118690747	-	intestines
Peak_3016	1	118859154	118859290	+	kidney-3
Peak_3017	1	118899122	118899133	+	skin
Peak_3018	1	118901345	118901364	+	skin
Peak_3023	1	118997290	118997300	+	liver
Peak_3026	1	119045950	119046129	-	testis
Peak_3031	1	119162690	119162732	-	heart
Peak_3034	1	119191148	119191258	-	esophagus-heart-muscle
Peak_3035	1	119329528	119329568	-	intestines
Peak_3050	1	120899487	120899508	-	esophagus-muscle
Peak_3056	1	120903716	120903738	+	cerebellum-3
Peak_3063	1	120911850	120911880	+	esophagus-muscle
Peak_3065	1	120912990	120913275	+	testis
Peak_3067	1	120915722	120915794	+	cerebellum-3
Peak_3070	1	120921168	120921179	+	cerebellum-3
Peak_3071	1	120939713	120939770	+	cerebellulm-2
Peak_3080	1	121945945	121946353	+	intestines
Peak_3083	1	121946569	121946580	+	testis
Peak_3089	1	122279663	122279769	+	kidney-4
Peak_3096	1	124887297	124887326	-	testis
Peak_3100	1	124888643	124888667	-	testis
Peak_3101	1	124888955	124888994	-	brain
Peak_3107	1	125368478	125368533	+	ileum-2
Peak_3116	1	125875318	125875414	-	cerebellum-1
Peak_3120	1	125979698	125979718	-	pre-stomach
Peak_3121	1	125985933	125985953	-	brain cortex-1
Peak_3122	1	125986577	125986729	-	testis
Peak_3127	1	126320400	126320461	-	testis
Peak_3130	1	126356271	126356272	-	intestines
Peak_3136	1	126452850	126452947	-	intestines
Peak_3137	1	126471332	126471425	-	testis
Peak_3151	1	126736074	126736245	+	intestines
Peak_3158	1	126778339	126778358	+	ileum-2
Peak_3166	1	126889694	126889752	+	thymus-1
Peak_3167	1	126893426	126893442	+	thymus-1
Peak_3168	1	126893644	126893662	+	thymus-1
Peak_3169	1	126894086	126894088	+	thymus-1
Peak_3170	1	126896968	126896988	+	thymus-1
Peak_3171	1	126898453	126898516	+	thymus-1
Peak_3178	1	126975370	126975399	+	intestines
Peak_3180	1	127011588	127011637	+	ileum-2
Peak_3205	1	127469065	127469175	-	intestines
Peak_3207	1	127469334	127469341	-	testis
Peak_3220	1	127576958	127577004	-	testis
Peak_3225	1	127589965	127590021	-	brain
Peak_3229	1	127591990	127592082	-	brain
Peak_3240	1	127722971	127723008	-	ileum-2
Peak_3242	1	127773388	127773454	-	brain
Peak_3244	1	127777392	127777413	-	testis
Peak_3246	1	127827561	127827586	-	brain cortex-2
Peak_3247	1	127861913	127861943	-	testis
Peak_3253	1	128008796	128008828	-	testis
Peak_3264	1	128389624	128389649	-	testis
Peak_3268	1	129414243	129414430	+	esophagus-heart-muscle
Peak_3271	1	129556697	129556856	+	testis
Peak_3275	1	129707454	129707586	+	liver
Peak_3287	1	130293089	130293181	+	pre-stomach
Peak_3293	1	130446351	130446397	+	ileum-2
Peak_3297	1	130505062	130505087	-	thymus-2
Peak_3299	1	130518663	130518873	+	testis
Peak_3300	1	130520758	130520768	+	testis
Peak_3304	1	130707916	130707939	-	brain
Peak_3307	1	130708996	130709008	-	brain
Peak_3312	1	130773567	130773660	-	brain
Peak_3317	1	130829551	130829573	-	testis
Peak_3320	1	130930765	130930804	-	testis
Peak_3321	1	130930959	130931052	-	testis
Peak_3322	1	130942999	130943080	+	pre-stomach
Peak_3328	1	131015207	131015440	+	kidney-3
Peak_3333	1	131039696	131039711	+	pre-stomach
Peak_3336	1	131131713	131131793	-	lung
Peak_3338	1	132177249	132177288	-	thymus-1
Peak_3339	1	132181312	132181357	-	pre-stomach
Peak_3342	1	132188181	132188194	-	thymus-1
Peak_3359	1	132292899	132292977	-	testis
Peak_3363	1	132334521	132334761	-	brain
Peak_3367	1	132419261	132419578	+	thymus-1
Peak_3387	1	132930729	132930770	-	testis
Peak_3392	1	133024287	133024375	-	liver
Peak_3394	1	133082760	133082775	+	testis
Peak_3406	1	133265871	133265955	-	esophagus-heart-muscle
Peak_3408	1	133286805	133286866	-	skin
Peak_3412	1	133349667	133349681	-	adipose-1
Peak_3416	1	133384269	133384309	-	abomasum
Peak_3418	1	134553109	134553127	-	brain
Peak_3424	1	134839277	134839377	-	testis
Peak_3435	1	135336539	135336599	+	kidney-3
Peak_3440	1	135468436	135468587	+	testis
Peak_3451	1	135686349	135686435	-	liver
Peak_3454	1	135753475	135753609	+	testis
Peak_3456	1	135805995	135805997	+	testis
Peak_3459	1	135880936	135881084	-	liver
Peak_3460	1	135881661	135881902	-	testis
Peak_3461	1	135884222	135884290	-	testis
Peak_3464	1	135953736	135954060	-	intestines
Peak_3465	1	135954339	135954392	-	intestines
Peak_3468	1	135955962	135956052	-	intestines
Peak_3470	1	135973529	135973586	-	ileum-2
Peak_3471	1	136027619	136027650	-	brain
Peak_3472	1	136217986	136218006	-	testis
Peak_3477	1	136814736	136814973	+	liver
Peak_3481	1	136905462	136905513	-	brain
Peak_3482	1	136905713	136905788	+	testis
Peak_3484	1	136970036	136970080	+	testis
Peak_3491	1	137214698	137214773	+	kidney-2
Peak_3492	1	137215242	137215453	-	intestines
Peak_3495	1	137294356	137294441	-	pre-stomach
Peak_3496	1	137659395	137659409	+	brain cortex-2
Peak_3497	1	137662111	137662180	+	brain cortex-2
Peak_3506	1	138838169	138838311	-	brain
Peak_3507	1	138838359	138838555	+	testis
Peak_3515	1	138996164	138996630	-	testis
Peak_3526	1	139252297	139252310	-	ileum-1
Peak_3533	1	139340080	139340092	-	abomasum
Peak_3539	1	139412795	139412858	+	ovary
Peak_3542	1	139431763	139431811	-	testis
Peak_3546	1	139442978	139443141	+	brain
Peak_3552	1	139708477	139708727	+	liver
Peak_3561	1	140165015	140165039	-	testis
Peak_3573	1	141533940	141534008	+	intestines
Peak_3574	1	141551084	141551187	+	pre-stomach
Peak_3578	1	141668279	141668299	+	heart
Peak_3587	1	141757975	141758124	-	intestines
Peak_3592	1	141872468	141872490	+	skin
Peak_3599	1	142132443	142132503	-	liver
Peak_3605	1	142488568	142488642	+	brain
Peak_3610	1	142618005	142618235	-	intestines
Peak_3613	1	142634560	142634684	-	abomasum
Peak_3622	1	142798188	142798490	+	intestines
Peak_3628	1	142930571	142930666	+	brain
Peak_3641	1	143160231	143160406	+	testis
Peak_3643	1	143220200	143220210	-	liver
Peak_3644	1	143241216	143241290	-	liver
Peak_3645	1	143242354	143242446	-	liver
Peak_3664	1	143652321	143652345	-	kidney-3
Peak_3666	1	143729006	143729098	-	brain
Peak_3667	1	143729110	143729167	+	thymus-1
Peak_3669	1	143782366	143782485	+	brain
Peak_3678	1	143850670	143850683	-	thymus-1
Peak_3687	1	144019540	144019547	+	hypothalamus
Peak_3696	1	144134094	144134159	+	testis
Peak_3698	1	144151154	144151155	+	heart
Peak_3700	1	144235151	144235184	-	testis
Peak_3703	1	144352031	144352233	-	testis
Peak_3708	1	144370140	144370148	+	ileum-2
Peak_3713	1	144445568	144445596	-	testis
Peak_3716	1	144490814	144490830	-	skin
Peak_3717	1	144499329	144499348	-	skin
Peak_3720	1	144529255	144529268	-	skin
Peak_3721	1	144549093	144549119	+	skin
Peak_3723	1	144569959	144569979	+	skin
Peak_3728	1	144597088	144597119	+	skin
Peak_3729	1	144605058	144605074	+	skin
Peak_3730	1	144610766	144610799	+	skin
Peak_3732	1	144683881	144684134	-	testis
Peak_3734	1	144684299	144684381	-	testis
Peak_3735	1	144696639	144696827	-	testis
Peak_3739	1	144718320	144718332	-	brain cortex-2
Peak_3745	1	144788679	144788769	-	intestines
Peak_3747	1	144806903	144806916	-	cerebellulm-2
Peak_3767	1	145106283	145106417	-	liver
Peak_3773	1	145259139	145259140	+	skin
Peak_3775	1	145274293	145274306	+	liver
Peak_3777	1	145282084	145282086	+	liver
Peak_3782	1	145296164	145296165	+	liver
Peak_3783	1	145313247	145313261	-	brain cortex-2
Peak_3784	1	145322220	145322240	-	intestines
Peak_3785	1	145325271	145325304	-	testis
Peak_3822	1	145826264	145826277	+	skin
Peak_3830	1	145881351	145881435	-	testis
Peak_3834	1	145956505	145956512	-	testis
Peak_3836	1	145973113	145973535	+	testis
Peak_3842	1	146001494	146001542	-	testis
Peak_3843	1	146001721	146001822	+	testis
Peak_3845	1	146002233	146002351	+	ovary
Peak_3846	1	146034943	146034961	+	esophagus-heart-muscle
Peak_3848	1	146050386	146050420	+	testis
Peak_3857	1	146273016	146273093	-	brain
Peak_3858	1	146279975	146280070	-	brain
Peak_3859	1	146299863	146299882	+	heart
Peak_3869	1	146607919	146608061	-	testis
Peak_3870	1	146608123	146608233	+	testis
Peak_3907	1	148340626	148340683	-	brain
Peak_3909	1	148340828	148340919	-	testis
Peak_3912	1	148354563	148354578	+	kidney-3
Peak_3913	1	148359061	148359130	+	liver
Peak_3914	1	148405132	148405227	+	intestines
Peak_3915	1	148406891	148406906	+	intestines
Peak_3917	1	148435056	148435163	-	thymus-1
Peak_3918	1	148435387	148435442	+	testis
Peak_3920	1	148441924	148441951	+	intestines
Peak_3930	1	148657568	148657636	+	intestines
Peak_3932	1	148757416	148757426	-	liver
Peak_3938	1	148972792	148972806	+	pre-stomach
Peak_3944	1	149178244	149178289	-	liver
Peak_3949	1	149231451	149231568	+	esophagus-muscle
Peak_3950	1	149231733	149231808	-	liver
Peak_3954	1	149259097	149259170	+	pre-stomach
Peak_3956	1	149317713	149317948	-	testis
Peak_3957	1	149317962	149318107	+	brain
Peak_3965	1	149385298	149385308	+	testis
Peak_3968	1	149407202	149407206	+	brain
Peak_3969	1	149412246	149412318	+	testis
Peak_3970	1	149415931	149415947	+	heart
Peak_3974	1	149430719	149430734	+	brain
Peak_3975	1	149434184	149434214	+	brain
Peak_3977	1	149495852	149495956	-	brain
Peak_3986	1	149567919	149567971	+	testis
Peak_4028	1	150141038	150141111	-	brain
Peak_4030	1	150539505	150539536	+	abomasum
Peak_4031	1	150539841	150539856	+	kidney-3
Peak_4034	1	150560727	150560763	+	abomasum
Peak_4036	1	150576329	150576346	+	kidney-3
Peak_4055	1	151162099	151162135	+	brain cortex-2
Peak_4073	1	151562063	151562065	+	testis
Peak_4080	1	152232783	152232935	+	testis
Peak_4082	1	152276116	152276130	+	intestines
Peak_4088	1	152366345	152366589	-	brain
Peak_4090	1	152450788	152450897	-	testis
Peak_4098	1	152524740	152524775	-	pre-stomach
Peak_4100	1	152547921	152547941	-	thymus-1
Peak_4101	1	152627794	152627798	-	esophagus-heart-muscle
Peak_4102	1	152638087	152638178	+	testis
Peak_4103	1	152638298	152638645	-	testis
Peak_4107	1	152726545	152726552	-	testis
Peak_4108	1	152770275	152770317	-	testis
Peak_4113	1	152827096	152827172	-	cerebellum-1
Peak_4114	1	152827586	152827681	-	esophagus-muscle
Peak_4136	1	153400668	153400680	-	kidney-4
Peak_4137	1	153407309	153407335	-	thymus-1
Peak_4138	1	153431079	153431103	-	testis
Peak_4143	1	153457526	153457557	-	intestines
Peak_4145	1	153513666	153513797	-	ileum-2
Peak_4153	1	153662354	153662359	-	testis
Peak_4154	1	153663107	153663136	-	testis
Peak_4179	1	154341204	154341283	-	brain
Peak_4187	1	154484614	154484634	-	testis
Peak_4196	1	154584897	154585012	-	testis
Peak_4199	1	154597032	154597049	-	thymus-1
Peak_4202	1	154631676	154631685	-	testis
Peak_4240	1	155432676	155433071	-	brain
Peak_4250	1	155483938	155483939	-	skin
Peak_4256	1	155510707	155510734	-	thymus-2
Peak_4281	1	156834097	156834128	+	kidney-1
Peak_4285	1	157132937	157133059	-	liver
Peak_4292	1	157178592	157178645	-	testis
Peak_4293	1	157190503	157190552	-	testis
Peak_4296	1	157198483	157198826	+	pre-stomach
Peak_4297	1	157249586	157249625	-	testis
Peak_4301	1	157298841	157298946	+	brain
Peak_4312	1	157410799	157410909	-	intestines
Peak_4313	1	157411066	157411079	-	testis
Peak_4314	1	157422617	157422632	-	ileum-2
Peak_4317	1	157560684	157560696	-	testis
Peak_4324	1	157743749	157743752	+	pre-stomach
Peak_4330	1	157916310	157916322	-	testis
Peak_4331	1	158070370	158070453	+	testis
Peak_4334	1	158228590	158228689	-	testis
Peak_4338	1	158240976	158241011	-	testis
Peak_4341	1	158267694	158267762	-	testis
Peak_4344	1	158293324	158293339	-	testis
Peak_4349	1	158359779	158360137	-	testis
Peak_4366	10	748350	748369	+	liver
Peak_4374	10	1043518	1043652	-	intestines
Peak_4376	10	1094628	1094780	+	brain
Peak_4377	10	1095131	1095188	+	brain
Peak_4381	10	1161176	1161367	-	testis
Peak_4384	10	1172853	1172866	-	brain
Peak_4389	10	1263753	1263903	-	brain
Peak_4395	10	1299289	1299469	-	brain
Peak_4397	10	1403646	1403659	-	esophagus-muscle
Peak_4406	10	1744709	1744764	+	kidney-4
Peak_4418	10	2213970	2214023	+	cerebellum-3
Peak_4421	10	2217806	2217809	+	cerebellulm-2
Peak_4427	10	2274205	2274232	+	testis
Peak_4429	10	2367727	2367747	+	liver
Peak_4433	10	2465076	2465090	+	cerebellum-3
Peak_4435	10	2932718	2932763	+	ovary
Peak_4438	10	3262077	3262096	+	liver
Peak_4442	10	4004750	4004773	-	testis
Peak_4444	10	4104861	4104925	-	esophagus-heart-muscle
Peak_4445	10	4116618	4116639	-	testis
Peak_4447	10	4159292	4159314	-	lung
Peak_4457	10	4383106	4383135	-	kidney-3
Peak_4465	10	4467264	4467285	-	liver
Peak_4470	10	4590275	4590294	-	liver
Peak_4471	10	4669723	4669751	-	testis
Peak_4475	10	4702675	4702819	-	brain
Peak_4476	10	4702823	4702954	+	testis
Peak_4477	10	4703567	4703576	+	testis
Peak_4478	10	4712556	4712611	+	brain
Peak_4481	10	4904518	4904555	+	testis
Peak_4484	10	4936956	4937033	+	testis
Peak_4486	10	5012663	5012683	+	testis
Peak_4507	10	5277222	5277346	-	brain
Peak_4519	10	5674926	5675044	-	brain
Peak_4525	10	6531431	6531495	-	intestines
Peak_4526	10	6532038	6532051	-	intestines
Peak_4536	10	6771855	6771859	+	testis
Peak_4537	10	6784093	6784112	+	testis
Peak_4549	10	6925380	6925468	-	testis
Peak_4552	10	7111133	7111169	-	testis
Peak_4553	10	7115624	7115710	-	testis
Peak_4555	10	7137428	7137473	+	testis
Peak_4556	10	7361671	7361869	+	brain
Peak_4564	10	7626428	7626476	+	pre-stomach
Peak_4565	10	7627076	7627088	+	liver
Peak_4571	10	7786666	7786699	+	liver
Peak_4577	10	7838748	7838772	+	testis
Peak_4582	10	7858180	7858192	+	colon
Peak_4583	10	7876539	7876552	+	intestines
Peak_4584	10	7879280	7879295	+	intestines
Peak_4585	10	7900884	7900895	+	testis
Peak_4587	10	7940854	7940901	+	intestines
Peak_4592	10	8022246	8022389	+	pre-stomach
Peak_4595	10	8176639	8176848	+	brain
Peak_4596	10	8205105	8205247	+	liver
Peak_4601	10	8336622	8336750	+	esophagus-heart-muscle
Peak_4605	10	8400681	8400693	+	heart
Peak_4618	10	8852250	8852348	-	liver
Peak_4620	10	8884678	8884697	-	testis
Peak_4634	10	9561118	9561160	-	testis
Peak_4637	10	9571051	9571056	-	kidney-4
Peak_4652	10	10142831	10142920	+	liver
Peak_4663	10	10306040	10306125	+	skin
Peak_4674	10	10540996	10541178	-	kidney-4
Peak_4675	10	10546730	10546832	-	liver
Peak_4676	10	10547706	10547719	-	kidney-4
Peak_4690	10	10724132	10724146	+	esophagus-heart-muscle
Peak_4691	10	10724335	10724395	+	esophagus-heart-muscle
Peak_4692	10	10725323	10725379	+	esophagus-heart-muscle
Peak_4693	10	10726475	10726629	+	esophagus-heart-muscle
Peak_4694	10	10826392	10826405	+	heart
Peak_4698	10	10961412	10961456	-	brain
Peak_4712	10	11216746	11216847	-	testis
Peak_4719	10	11392548	11392749	+	testis
Peak_4721	10	11460185	11460301	-	testis
Peak_4727	10	11498528	11498732	+	pre-stomach
Peak_4731	10	11615530	11615550	-	brain
Peak_4738	10	11924448	11924458	-	esophagus-muscle
Peak_4739	10	11926193	11926383	-	testis
Peak_4742	10	11982854	11983003	+	intestines
Peak_4743	10	11983248	11983313	+	intestines
Peak_4755	10	12128640	12128722	-	testis
Peak_4756	10	12129428	12129511	-	esophagus-heart-muscle
Peak_4764	10	12316749	12316764	-	skin
Peak_4766	10	12354618	12354690	-	testis
Peak_4770	10	12424465	12424585	-	brain
Peak_4778	10	12500743	12500880	-	testis
Peak_4780	10	12501894	12502032	+	testis
Peak_4781	10	12503782	12503802	+	testis
Peak_4783	10	12536574	12536653	+	brain
Peak_4788	10	12674860	12675070	-	brain
Peak_4793	10	12743325	12743346	+	testis
Peak_4794	10	12743583	12743743	+	pre-stomach
Peak_4800	10	13163469	13163592	-	brain
Peak_4806	10	13252097	13252221	-	intestines
Peak_4808	10	13276538	13276553	+	brain
Peak_4810	10	13310093	13310107	+	testis
Peak_4813	10	13329995	13330018	+	intestines
Peak_4814	10	13343099	13343187	+	brain cortex-2
Peak_4818	10	13362346	13362609	+	testis
Peak_4821	10	13415138	13415166	-	adipose-2
Peak_4838	10	14103093	14103161	-	brain
Peak_4839	10	14103246	14103336	+	brain
Peak_4847	10	14532816	14532828	+	cerebellum-3
Peak_4851	10	14669525	14669545	+	cerebellum-3
Peak_4864	10	15044802	15044902	-	intestines
Peak_4872	10	15117690	15117702	+	abomasum
Peak_4877	10	15418076	15418094	+	cerebellum-3
Peak_4878	10	15419723	15419737	+	brain
Peak_4882	10	15491784	15491803	+	brain cortex-2
Peak_4883	10	15495669	15495690	+	brain cortex-2
Peak_4888	10	15555324	15555325	+	brain
Peak_4889	10	15566035	15566185	+	brain
Peak_4896	10	15648779	15649006	-	testis
Peak_4898	10	15650313	15650348	-	cerebellum-3
Peak_4901	10	15650881	15650892	-	liver
Peak_4904	10	15680039	15680108	-	brain
Peak_4908	10	15904792	15904835	+	cerebellum-1
Peak_4921	10	16136855	16136863	+	liver
Peak_4922	10	16171941	16172045	+	pre-stomach
Peak_4923	10	16179434	16179548	+	kidney-3
Peak_4924	10	16185541	16185564	+	liver
Peak_4925	10	16212044	16212113	+	intestines
Peak_4928	10	16287644	16287758	+	intestines
Peak_4939	10	16970594	16970707	-	skin
Peak_4948	10	17595406	17595586	-	pre-stomach
Peak_4953	10	17701763	17701841	-	brain
Peak_4956	10	17737072	17737097	-	testis
Peak_4957	10	17737155	17737462	+	brain
Peak_4958	10	17781473	17781601	+	brain
Peak_4978	10	18717247	18717268	-	testis
Peak_4989	10	19061303	19061674	-	testis
Peak_4993	10	19128380	19128425	-	lung
Peak_4995	10	19138267	19138476	-	esophagus-heart-muscle
Peak_4996	10	19139612	19139627	-	esophagus-muscle
Peak_4997	10	19140420	19140515	-	esophagus-muscle
Peak_4999	10	19154661	19154673	-	esophagus-muscle
Peak_5001	10	19161799	19161863	-	testis
Peak_5003	10	19164398	19164641	-	brain
Peak_5005	10	19182014	19182056	-	testis
Peak_5007	10	19197635	19198018	-	esophagus-muscle
Peak_5009	10	19214620	19214772	-	testis
Peak_5010	10	19240426	19240482	-	brain
Peak_5013	10	19296204	19296265	-	testis
Peak_5035	10	19486096	19486166	+	brain
Peak_5040	10	19888567	19888725	+	brain
Peak_5045	10	20189902	20189916	+	brain
Peak_5046	10	20261258	20261297	+	testis
Peak_5047	10	20334129	20334315	+	testis
Peak_5048	10	20355289	20355356	+	testis
Peak_5056	10	20559381	20559435	-	brain
Peak_5058	10	20690530	20690607	+	testis
Peak_5065	10	20744421	20744448	-	testis
Peak_5068	10	20745629	20745789	+	cerebellum-3
Peak_5070	10	20747670	20747683	+	cerebellum-3
Peak_5083	10	20832493	20832591	+	intestines
Peak_5085	10	20835174	20835204	+	intestines
Peak_5088	10	20855806	20855834	-	intestines
Peak_5090	10	20859143	20859172	+	liver
Peak_5092	10	20862435	20862554	+	liver
Peak_5096	10	20883488	20883511	-	ileum-2
Peak_5099	10	20893073	20893117	+	pre-stomach
Peak_5100	10	20893263	20893425	+	pre-stomach
Peak_5102	10	20901588	20901672	+	pre-stomach
Peak_5106	10	20905415	20905480	+	pre-stomach
Peak_5111	10	20909580	20909592	+	pre-stomach
Peak_5113	10	20926526	20926625	+	testis
Peak_5116	10	20936140	20936443	+	brain
Peak_5117	10	20936602	20936654	+	brain
Peak_5118	10	20946257	20946361	+	brain
Peak_5128	10	20991444	20991456	-	testis
Peak_5131	10	21003642	21003775	-	esophagus-heart-muscle
Peak_5134	10	21010362	21010564	+	thymus-1
Peak_5136	10	21015912	21015936	-	liver
Peak_5140	10	21028918	21029040	+	ileum-2
Peak_5141	10	21029084	21029356	-	liver
Peak_5146	10	21068017	21068032	-	brain
Peak_5150	10	21087462	21087569	-	testis
Peak_5151	10	21090487	21090498	-	liver
Peak_5157	10	21370513	21370599	+	brain cortex-2
Peak_5158	10	21370662	21370745	-	brain
Peak_5159	10	21373513	21373576	-	testis
Peak_5160	10	21377948	21377961	+	brain
Peak_5169	10	21392311	21392325	-	testis
Peak_5171	10	21395200	21395346	+	brain
Peak_5174	10	21416993	21417111	+	thymus-1
Peak_5177	10	21468717	21468839	-	testis
Peak_5178	10	21479570	21479583	+	heart
Peak_5183	10	21489666	21489669	+	heart
Peak_5185	10	21490397	21490409	+	esophagus-heart-muscle
Peak_5187	10	21494815	21494894	+	esophagus-heart-muscle
Peak_5188	10	21495046	21495050	+	esophagus-heart-muscle
Peak_5190	10	21498177	21498274	+	esophagus-heart-muscle
Peak_5192	10	21498920	21498977	+	esophagus-heart-muscle
Peak_5193	10	21499772	21499787	+	esophagus-heart-muscle
Peak_5194	10	21500173	21500176	+	esophagus-heart-muscle
Peak_5195	10	21501154	21501159	+	esophagus-heart-muscle
Peak_5196	10	21502387	21502389	+	esophagus-heart-muscle
Peak_5197	10	21503107	21503301	+	esophagus-heart-muscle
Peak_5198	10	21504067	21504068	+	esophagus-heart-muscle
Peak_5199	10	21506290	21506298	+	esophagus-heart-muscle
Peak_5201	10	21506574	21506613	+	esophagus-heart-muscle
Peak_5205	10	21508113	21508127	+	esophagus-heart-muscle
Peak_5206	10	21508334	21508345	+	esophagus-heart-muscle
Peak_5208	10	21514480	21514508	+	heart
Peak_5210	10	21526164	21526270	+	heart
Peak_5211	10	21527793	21527899	+	heart
Peak_5212	10	21537754	21537769	+	heart
Peak_5214	10	21539062	21539083	+	skin
Peak_5215	10	21546782	21546932	-	brain
Peak_5216	10	21547124	21547178	-	brain
Peak_5220	10	21559303	21559340	+	pre-stomach
Peak_5225	10	21572326	21572427	+	brain
Peak_5228	10	21577945	21578001	+	brain
Peak_5233	10	21594715	21594805	-	testis
Peak_5243	10	21607302	21607342	-	adipose-2
Peak_5244	10	21610251	21610266	+	thymus-1
Peak_5246	10	21611123	21611162	-	testis
Peak_5257	10	21684104	21684168	+	brain
Peak_5259	10	21685266	21685282	+	cerebellum-1
Peak_5262	10	21735163	21735174	+	thymus-1
Peak_5265	10	21762214	21762229	-	testis
Peak_5266	10	21762366	21762444	+	intestines
Peak_5268	10	21762698	21762961	+	testis
Peak_5276	10	21789574	21789589	+	testis
Peak_5279	10	21794789	21795005	+	testis
Peak_5283	10	21806572	21806584	-	kidney-4
Peak_5287	10	21822156	21822187	+	testis
Peak_5288	10	21839287	21839364	+	intestines
Peak_5290	10	21841991	21842055	+	thymus-1
Peak_5294	10	21862242	21862298	+	pre-stomach
Peak_5296	10	21868073	21868109	+	liver
Peak_5300	10	21915828	21915992	+	testis
Peak_5301	10	21920079	21920084	+	testis
Peak_5306	10	21928358	21928384	+	testis
Peak_5310	10	21946406	21946437	-	cerebellum-3
Peak_5316	10	21970145	21970160	-	skin
Peak_5325	10	21990688	21990692	+	liver
Peak_5330	10	22042171	22042238	-	brain
Peak_5335	10	22212568	22212664	-	testis
Peak_5336	10	22212709	22212759	+	testis
Peak_5341	10	22249453	22249469	+	testis
Peak_5358	10	22300863	22300874	-	thymus-1
Peak_5361	10	22306757	22306773	-	thymus-1
Peak_5369	10	22332049	22332063	-	intestines
Peak_5373	10	22356959	22357190	-	intestines
Peak_5374	10	22360604	22360759	-	intestines
Peak_5376	10	22385073	22385086	-	thymus-2
Peak_5385	10	22505387	22505518	-	intestines
Peak_5386	10	22549101	22549222	-	intestines
Peak_5388	10	22615392	22615494	-	intestines
Peak_5389	10	22654108	22654195	-	thymus-1
Peak_5391	10	22693610	22693640	-	intestines
Peak_5393	10	22708647	22708671	-	thymus-1
Peak_5397	10	22748452	22748529	+	intestines
Peak_5400	10	22781766	22781799	+	thymus-1
Peak_5404	10	22810135	22810283	+	thymus-1
Peak_5405	10	22820049	22820064	+	thymus-1
Peak_5408	10	22837361	22837440	+	thymus-1
Peak_5413	10	22893901	22893936	+	thymus-1
Peak_5422	10	23011902	23012049	+	thymus-1
Peak_5427	10	23065300	23065329	+	thymus-1
Peak_5438	10	23247069	23247084	+	thymus-1
Peak_5440	10	23267982	23268103	+	thymus-1
Peak_5441	10	23272084	23272106	+	thymus-1
Peak_5443	10	23291044	23291065	-	thymus-1
Peak_5444	10	23299429	23299452	-	thymus-1
Peak_5445	10	23304545	23304600	-	testis
Peak_5447	10	23332790	23332892	-	intestines
Peak_5449	10	23342636	23342682	-	thymus-1
Peak_5450	10	23352950	23353016	-	intestines
Peak_5451	10	23359912	23359968	-	thymus-1
Peak_5463	10	23542428	23542490	-	thymus-1
Peak_5464	10	23587875	23587933	-	thymus-1
Peak_5466	10	23606074	23606151	-	thymus-1
Peak_5470	10	23698177	23698248	-	testis
Peak_5481	10	24924922	24924968	-	thymus-1
Peak_5482	10	24928232	24928295	-	thymus-2
Peak_5487	10	24979106	24979185	-	brain
Peak_5491	10	25031864	25031936	-	lung
Peak_5492	10	25037544	25037612	-	intestines
Peak_5498	10	25103401	25103422	-	thymus-1
Peak_5501	10	25161624	25161730	-	thymus-2
Peak_5502	10	25171981	25172047	-	thymus-1
Peak_5504	10	25209700	25209753	-	thymus-1
Peak_5505	10	25213027	25213062	-	thymus-1
Peak_5510	10	25262725	25262806	-	thymus-1
Peak_5511	10	25267246	25267296	-	thymus-1
Peak_5512	10	25269633	25269686	-	testis
Peak_5516	10	25332312	25332334	-	thymus-1
Peak_5526	10	25476223	25476227	-	thymus-1
Peak_5530	10	25633294	25633302	-	thymus-1
Peak_5533	10	25650061	25650234	+	brain
Peak_5535	10	25678040	25678055	-	testis
Peak_5538	10	25692908	25692990	-	testis
Peak_5539	10	25692997	25693064	+	testis
Peak_5540	10	25693188	25693214	-	testis
Peak_5542	10	25693480	25693558	+	testis
Peak_5543	10	25712351	25712453	+	thymus-1
Peak_5545	10	25725916	25725996	+	testis
Peak_5553	10	25771532	25771603	+	testis
Peak_5556	10	25771841	25771917	+	testis
Peak_5564	10	25842859	25842926	-	testis
Peak_5577	10	25925442	25925452	+	testis
Peak_5583	10	25990589	25990685	-	intestines
Peak_5585	10	25993096	25993135	+	brain
Peak_5586	10	25997583	25997585	+	cerebellulm-2
Peak_5600	10	26078521	26078593	+	brain
Peak_5601	10	26079155	26079247	+	brain
Peak_5602	10	26079439	26079491	+	brain cortex-1
Peak_5603	10	26079988	26080052	+	esophagus-heart-muscle
Peak_5604	10	26080219	26080366	+	brain
Peak_5605	10	26080737	26080752	+	lung
Peak_5609	10	26085380	26085381	+	brain
Peak_5613	10	26171723	26171759	-	thymus-1
Peak_5614	10	26195393	26195404	-	thymus-1
Peak_5615	10	26200406	26200432	+	testis
Peak_5619	10	26302134	26302148	-	testis
Peak_5623	10	26356784	26356797	+	kidney-4
Peak_5627	10	26407507	26407557	-	liver
Peak_5637	10	26547982	26548006	+	abomasum
Peak_5657	10	26673226	26673252	-	testis
Peak_5660	10	26673797	26673888	+	liver
Peak_5665	10	26700493	26700499	+	esophagus-heart-muscle
Peak_5669	10	26748002	26748054	+	thymus-1
Peak_5673	10	26779409	26779426	-	testis
Peak_5682	10	28278960	28278996	+	brain
Peak_5683	10	28279487	28279537	+	brain
Peak_5684	10	28285640	28285719	+	testis
Peak_5685	10	28286032	28286079	+	testis
Peak_5686	10	28297839	28297859	-	testis
Peak_5687	10	28299455	28299550	+	pre-stomach
Peak_5690	10	28325658	28325753	+	pre-stomach
Peak_5693	10	28391772	28391868	-	testis
Peak_5695	10	28406044	28406131	+	pre-stomach
Peak_5701	10	28490701	28490830	+	testis
Peak_5708	10	28621535	28621540	+	hypothalamus
Peak_5712	10	28697009	28697066	+	testis
Peak_5722	10	29498485	29498507	+	skin
Peak_5724	10	29551778	29552025	+	pre-stomach
Peak_5727	10	29577509	29577549	+	kidney-4
Peak_5728	10	29652005	29652018	+	testis
Peak_5740	10	30077772	30077787	-	thymus-1
Peak_5741	10	30087182	30087278	-	intestines
Peak_5745	10	30257792	30257795	-	brain
Peak_5746	10	30288907	30288922	-	heart
Peak_5747	10	30292556	30292559	-	heart
Peak_5753	10	30440127	30440208	-	thymus-1
Peak_5754	10	30457114	30457214	-	brain
Peak_5755	10	30457190	30457345	+	testis
Peak_5756	10	30513405	30513474	+	testis
Peak_5758	10	30554323	30554371	+	testis
Peak_5762	10	31026289	31026503	-	testis
Peak_5769	10	32243743	32243774	+	testis
Peak_5778	10	32618759	32618767	-	testis
Peak_5789	10	32770606	32770614	-	kidney-4
Peak_5801	10	33644952	33645024	-	cerebellum-3
Peak_5803	10	33846844	33847267	+	cerebellum-3
Peak_5805	10	33849698	33849711	+	kidney-4
Peak_5807	10	33964401	33964440	+	testis
Peak_5810	10	34060070	34060165	+	testis
Peak_5817	10	34179073	34179265	-	thymus-1
Peak_5820	10	34276459	34276552	-	thymus-1
Peak_5821	10	34283909	34283949	+	thymus-1
Peak_5829	10	35212824	35212825	+	trachea
Peak_5831	10	35219287	35219298	+	trachea
Peak_5838	10	35579768	35579814	-	brain
Peak_5839	10	35590730	35590753	-	cerebellum-3
Peak_5841	10	35650406	35650468	+	testis
Peak_5845	10	35725927	35725931	-	brain
Peak_5846	10	35757190	35757257	-	thymus-1
Peak_5847	10	35786125	35786253	+	intestines
Peak_5848	10	35811113	35811142	+	testis
Peak_5849	10	35838122	35838151	+	cerebellum-3
Peak_5850	10	35840761	35840771	+	testis
Peak_5852	10	35852630	35852690	-	pre-stomach
Peak_5853	10	35856095	35856165	+	brain cortex-2
Peak_5855	10	35857482	35857525	+	brain cortex-2
Peak_5856	10	35866704	35866796	+	pre-stomach
Peak_5857	10	35867013	35867053	-	heart
Peak_5867	10	35967135	35967155	+	pre-stomach
Peak_5871	10	35975144	35975241	+	brain
Peak_5872	10	36000123	36000429	+	intestines
Peak_5873	10	36003325	36003397	+	testis
Peak_5874	10	36022773	36022890	+	liver
Peak_5878	10	36051654	36052055	+	testis
Peak_5881	10	36160853	36160922	-	esophagus-heart-muscle
Peak_5884	10	36179388	36179511	+	intestines
Peak_5887	10	36255202	36255487	+	intestines
Peak_5892	10	36312742	36312832	+	liver
Peak_5893	10	36313013	36313028	-	liver
Peak_5894	10	36313049	36313077	+	colon
Peak_5900	10	36366010	36366262	-	intestines
Peak_5905	10	36378144	36378165	+	pre-stomach
Peak_5907	10	36410885	36410899	-	testis
Peak_5908	10	36412827	36412871	-	pre-stomach
Peak_5915	10	36485754	36485844	+	skin
Peak_5921	10	36628645	36628699	-	esophagus-heart-muscle
Peak_5923	10	36645334	36645380	-	testis
Peak_5925	10	36653976	36653993	-	testis
Peak_5926	10	36683409	36683431	-	testis
Peak_5928	10	36719659	36719756	+	testis
Peak_5929	10	36720019	36720226	+	testis
Peak_5930	10	36737081	36737087	+	testis
Peak_5940	10	36789295	36789347	-	intestines
Peak_5941	10	36789419	36789663	+	intestines
Peak_5942	10	36820847	36820856	-	testis
Peak_5943	10	36830843	36830859	-	testis
Peak_5944	10	36832497	36832509	-	esophagus-heart-muscle
Peak_5952	10	36962142	36962253	+	brain
Peak_5959	10	37066891	37066993	+	thymus-1
Peak_5961	10	37097464	37097472	+	testis
Peak_5968	10	37170396	37170515	+	testis
Peak_5973	10	37207416	37207462	+	testis
Peak_5976	10	37222139	37222194	+	testis
Peak_5977	10	37229579	37229635	+	skin
Peak_5986	10	37535891	37535904	-	testis
Peak_5988	10	37555054	37555079	-	testis
Peak_5999	10	37711239	37711375	+	esophagus-muscle
Peak_6004	10	37770462	37770477	-	esophagus-heart-muscle
Peak_6005	10	37770746	37770761	-	esophagus-heart-muscle
Peak_6006	10	37777044	37777055	-	esophagus-heart-muscle
Peak_6007	10	37785882	37785897	-	esophagus-heart-muscle
Peak_6009	10	37794526	37794539	-	heart
Peak_6010	10	37794989	37795007	+	testis
Peak_6014	10	37821867	37821903	+	testis
Peak_6016	10	37825902	37825916	-	testis
Peak_6020	10	37875088	37875179	+	brain
Peak_6022	10	37897271	37897290	+	isthmus
Peak_6023	10	37982519	37982549	+	testis
Peak_6024	10	37987587	37987598	+	skin
Peak_6040	10	38333762	38333855	+	testis
Peak_6041	10	38358684	38358774	+	liver
Peak_6042	10	38358687	38358711	-	brain
Peak_6046	10	38393487	38393606	+	liver
Peak_6077	10	42669970	42670081	-	intestines
Peak_6078	10	42670086	42670134	+	testis
Peak_6080	10	42671285	42671299	-	testis
Peak_6084	10	42707626	42707744	+	brain
Peak_6085	10	42707785	42707863	-	testis
Peak_6086	10	42707929	42707999	+	brain
Peak_6087	10	42744015	42744226	+	cerebellum-3
Peak_6088	10	42744403	42744446	+	cerebellum-3
Peak_6089	10	42749255	42749417	+	testis
Peak_6090	10	42749825	42749865	+	testis
Peak_6119	10	43051888	43052002	-	testis
Peak_6127	10	43157587	43157719	-	testis
Peak_6129	10	43219801	43219883	-	esophagus-heart-muscle
Peak_6132	10	43283042	43283051	-	kidney-3
Peak_6133	10	43283860	43283888	-	kidney-3
Peak_6135	10	43284565	43284644	-	kidney-3
Peak_6145	10	43448693	43448810	+	brain
Peak_6156	10	43734426	43734452	+	skin
Peak_6157	10	43743650	43743822	-	liver
Peak_6161	10	43797327	43797596	-	pre-stomach
Peak_6164	10	43864122	43864183	-	testis
Peak_6166	10	43944720	43944810	-	testis
Peak_6170	10	44057402	44057631	+	testis
Peak_6174	10	44296513	44296544	+	pre-stomach
Peak_6176	10	44297112	44297127	+	pre-stomach
Peak_6179	10	44447948	44447972	+	testis
Peak_6180	10	44450989	44450990	+	skin
Peak_6188	10	44659824	44660156	+	brain
Peak_6190	10	44684518	44684522	+	testis
Peak_6202	10	44840945	44840946	+	skin
Peak_6212	10	45159416	45159430	+	testis
Peak_6214	10	45190348	45190358	+	kidney-3
Peak_6216	10	45256197	45256249	-	testis
Peak_6229	10	45366502	45366574	+	brain
Peak_6230	10	45378278	45378284	+	testis
Peak_6264	10	45649181	45649210	+	testis
Peak_6268	10	45663641	45663665	+	testis
Peak_6279	10	45830524	45830614	-	brain
Peak_6283	10	45844953	45845028	-	abomasum
Peak_6284	10	45859622	45859642	-	kidney-3
Peak_6288	10	45879843	45879859	-	testis
Peak_6290	10	45880167	45880438	+	liver
Peak_6292	10	45948631	45948672	+	intestines
Peak_6293	10	45950425	45950510	+	liver
Peak_6328	10	46493305	46493320	-	testis
Peak_6335	10	46589528	46589541	-	pre-stomach
Peak_6342	10	46709781	46709792	+	skin
Peak_6355	10	46888799	46888846	+	pre-stomach
Peak_6356	10	46889069	46889113	-	cerebellum-1
Peak_6358	10	46889380	46889463	-	esophagus-muscle
Peak_6360	10	46922349	46922436	-	testis
Peak_6375	10	47015458	47015763	-	testis
Peak_6384	10	47023589	47023600	-	esophagus-muscle
Peak_6386	10	47033427	47033474	-	esophagus-muscle
Peak_6391	10	47629525	47629570	-	brain
Peak_6394	10	47741559	47741575	-	esophagus-heart-muscle
Peak_6401	10	47877618	47877691	+	testis
Peak_6404	10	48008650	48008689	+	testis
Peak_6408	10	48034913	48035075	+	thymus-1
Peak_6411	10	48106637	48106638	+	testis
Peak_6419	10	48322992	48323023	+	mammary gland
Peak_6420	10	48892269	48892494	+	brain
Peak_6486	10	49591092	49591240	+	liver
Peak_6498	10	49707724	49707958	+	liver
Peak_6525	10	50557127	50557325	+	testis
Peak_6527	10	50583111	50583208	+	testis
Peak_6530	10	50637839	50637974	-	pre-stomach
Peak_6534	10	50815381	50815401	-	heart
Peak_6535	10	50891830	50891866	-	brain
Peak_6551	10	51123350	51123370	+	adipose-2
Peak_6555	10	51189424	51189434	-	testis
Peak_6556	10	51209269	51209381	-	intestines
Peak_6560	10	51291351	51291367	-	testis
Peak_6565	10	51347826	51348034	+	testis
Peak_6576	10	51465739	51465796	-	testis
Peak_6577	10	51508138	51508152	-	brain
Peak_6578	10	51508871	51509071	-	brain
Peak_6581	10	51535667	51535865	+	intestines
Peak_6588	10	51563346	51563347	+	ileum-1
Peak_6605	10	51781498	51781523	-	testis
Peak_6607	10	51859287	51859308	-	liver
Peak_6609	10	51980682	51980848	+	testis
Peak_6610	10	52136034	52136180	-	liver
Peak_6612	10	52215164	52215268	+	testis
Peak_6614	10	52339317	52339323	+	intestines
Peak_6617	10	52589293	52589346	-	testis
Peak_6626	10	52731848	52731915	-	liver
Peak_6629	10	52769162	52769180	-	liver
Peak_6630	10	52788825	52788840	-	kidney-4
Peak_6633	10	52833075	52833186	-	pre-stomach
Peak_6639	10	52867914	52867926	-	liver
Peak_6691	10	53415704	53415822	-	testis
Peak_6693	10	53416141	53416187	-	brain
Peak_6696	10	53648454	53648669	+	testis
Peak_6698	10	53648891	53648909	+	testis
Peak_6707	10	53846086	53846115	+	thymus-1
Peak_6711	10	53852559	53852672	+	thymus-1
Peak_6712	10	53893317	53893463	+	testis
Peak_6715	10	54098991	54099109	-	testis
Peak_6717	10	54223791	54223844	+	adipose-1
Peak_6718	10	54224217	54224365	-	liver
Peak_6720	10	54224838	54224852	-	isthmus
Peak_6721	10	54224920	54224947	+	brain
Peak_6723	10	54426200	54426332	+	thymus-1
Peak_6725	10	54479323	54479349	+	esophagus-muscle
Peak_6726	10	54578758	54578780	+	testis
Peak_6728	10	54636017	54636155	+	testis
Peak_6729	10	54636806	54636858	+	thymus-1
Peak_6732	10	54810408	54810472	+	brain
Peak_6734	10	54846453	54846744	+	testis
Peak_6735	10	54847057	54847068	+	brain
Peak_6737	10	54928607	54928630	-	testis
Peak_6738	10	54931102	54931275	-	testis
Peak_6747	10	54998894	54998946	-	testis
Peak_6749	10	54999193	54999248	-	testis
Peak_6750	10	55014812	55014935	+	intestines
Peak_6752	10	55034419	55034427	+	ileum-2
Peak_6753	10	55054431	55054490	+	intestines
Peak_6760	10	56051562	56051580	-	brain
Peak_6762	10	56343175	56343442	-	cerebellum-3
Peak_6766	10	56554657	56554741	+	testis
Peak_6768	10	57605106	57605130	+	testis
Peak_6769	10	57605414	57605472	+	liver
Peak_6771	10	57722249	57722349	+	esophagus-heart-muscle
Peak_6773	10	57722554	57722682	+	liver
Peak_6789	10	57818994	57819103	+	brain
Peak_6791	10	57819604	57819608	+	esophagus-muscle
Peak_6792	10	57819881	57819900	+	esophagus-muscle
Peak_6803	10	58061465	58061573	+	intestines
Peak_6830	10	58544490	58544662	-	pre-stomach
Peak_6835	10	58585801	58585812	-	testis
Peak_6836	10	58609656	58609790	-	brain
Peak_6839	10	58629407	58629454	+	brain
Peak_6840	10	58629788	58629813	+	brain cortex-2
Peak_6843	10	58738467	58738490	+	ileum-1
Peak_6844	10	58738671	58738750	+	brain
Peak_6845	10	58821470	58821536	+	testis
Peak_6848	10	59006113	59006125	-	brain
Peak_6849	10	59039048	59039060	+	esophagus-muscle
Peak_6853	10	59314629	59314674	+	brain
Peak_6860	10	59575755	59575922	+	liver
Peak_6871	10	59775547	59775629	+	testis
Peak_6872	10	59797630	59797785	-	testis
Peak_6876	10	59849817	59849930	-	testis
Peak_6877	10	59849957	59849984	+	brain cortex-2
Peak_6878	10	59850187	59850225	-	ileum-2
Peak_6880	10	59889998	59890050	+	testis
Peak_6881	10	59890244	59890369	+	intestines
Peak_6886	10	60070414	60070479	-	liver
Peak_6888	10	60090031	60090105	+	intestines
Peak_6889	10	60105907	60105921	+	intestines
Peak_6894	10	60329553	60329625	+	kidney-4
Peak_6897	10	60712236	60712420	-	testis
Peak_6907	10	61015863	61015869	-	abomasum
Peak_6911	10	61080692	61080850	+	esophagus-heart-muscle
Peak_6913	10	61180839	61180867	+	ileum-2
Peak_6925	10	61244013	61244094	+	testis
Peak_6929	10	61428020	61428138	+	intestines
Peak_6931	10	61489891	61489939	+	testis
Peak_6932	10	61504250	61504277	+	cerebellum-3
Peak_6939	10	61776135	61776164	+	mammary gland
Peak_6952	10	62070046	62070163	-	intestines
Peak_6953	10	62070630	62070881	-	testis
Peak_6954	10	62071086	62071162	-	testis
Peak_6956	10	62148846	62148873	-	kidney-1
Peak_6957	10	62149407	62149408	-	kidney-4
Peak_6961	10	62182416	62182498	-	kidney-4
Peak_6963	10	62219581	62219589	+	testis
Peak_6973	10	62695783	62696029	-	brain
Peak_6977	10	63282650	63282657	-	cerebellulm-2
Peak_6984	10	64865170	64865181	-	testis
Peak_7003	10	65019243	65019463	-	pre-stomach
Peak_7007	10	65098544	65098641	-	brain
Peak_7008	10	65098651	65098762	+	testis
Peak_7012	10	65201951	65202000	-	intestines
Peak_7020	10	65297193	65297209	-	pre-stomach
Peak_7021	10	65297781	65297853	-	esophagus
Peak_7022	10	65297929	65298003	+	pre-stomach
Peak_7023	10	65310271	65310339	-	testis
Peak_7027	10	65325428	65325442	+	pre-stomach
Peak_7028	10	65330101	65330162	+	pre-stomach
Peak_7039	10	65552751	65552752	-	heart
Peak_7043	10	65613148	65613229	-	testis
Peak_7050	10	65741003	65741128	-	brain
Peak_7065	10	66925118	66925245	+	intestines
Peak_7067	10	66975480	66975536	-	cerebellum-1
Peak_7070	10	66996668	66996935	-	brain
Peak_7072	10	67014387	67014469	-	testis
Peak_7075	10	67064101	67064196	+	testis
Peak_7089	10	67182594	67182666	+	testis
Peak_7092	10	67250659	67250740	+	testis
Peak_7097	10	67289021	67289032	+	heart
Peak_7099	10	67400541	67400569	-	liver
Peak_7102	10	67504428	67504509	-	intestines
Peak_7114	10	67627522	67627525	+	skin
Peak_7115	10	67677139	67677212	-	intestines
Peak_7117	10	67753174	67753292	+	testis
Peak_7118	10	67753483	67753521	+	testis
Peak_7121	10	67843037	67843039	-	testis
Peak_7122	10	67878933	67879096	-	testis
Peak_7124	10	68005240	68005270	+	testis
Peak_7125	10	68005751	68005774	+	testis
Peak_7127	10	68006243	68006385	+	testis
Peak_7134	10	68068968	68068970	+	testis
Peak_7138	10	68075420	68075509	+	testis
Peak_7140	10	68080985	68081004	+	testis
Peak_7142	10	68088800	68088811	+	testis
Peak_7143	10	68097323	68097337	+	testis
Peak_7145	10	68159649	68159659	+	kidney-4
Peak_7154	10	69004927	69004953	+	testis
Peak_7159	10	69224723	69224737	-	hypothalamus
Peak_7162	10	69671019	69671124	-	testis
Peak_7163	10	69671120	69671256	+	brain
Peak_7167	10	69853248	69853337	-	kidney-3
Peak_7170	10	70183978	70183987	-	cerebellum-3
Peak_7173	10	70515363	70515475	+	brain
Peak_7179	10	70570278	70570279	+	testis
Peak_7186	10	70591972	70592067	+	isthmus
Peak_7187	10	70592241	70592347	-	skin
Peak_7190	10	70593361	70593484	+	testis
Peak_7195	10	70697990	70698022	+	testis
Peak_7196	10	70698187	70698288	-	testis
Peak_7197	10	70698785	70698871	+	thymus-1
Peak_7198	10	70699622	70699663	-	testis
Peak_7199	10	70708415	70708434	+	testis
Peak_7203	10	70777768	70777776	+	kidney-3
Peak_7213	10	71479271	71479402	+	testis
Peak_7227	10	71630077	71630090	+	brain cortex-2
Peak_7231	10	71668881	71669030	+	testis
Peak_7234	10	71759796	71759874	-	testis
Peak_7235	10	71759889	71760010	+	testis
Peak_7238	10	71897636	71897828	-	brain
Peak_7246	10	72148457	72148565	+	brain
Peak_7249	10	72308575	72308915	+	brain
Peak_7252	10	72385708	72385852	-	pre-stomach
Peak_7255	10	72471724	72471780	+	testis
Peak_7264	10	72508733	72508747	+	ileum-1
Peak_7269	10	72694534	72694548	+	brain
Peak_7273	10	72820996	72821040	-	esophagus-muscle
Peak_7275	10	72828694	72828750	+	esophagus-muscle
Peak_7297	10	73391755	73391837	-	pre-stomach
Peak_7298	10	73436314	73436425	+	intestines
Peak_7334	10	73888916	73889039	+	testis
Peak_7339	10	74250093	74250207	+	testis
Peak_7344	10	75539179	75539299	+	liver
Peak_7347	10	75724501	75724625	-	testis
Peak_7349	10	75758318	75758336	-	esophagus
Peak_7352	10	75797039	75797109	-	testis
Peak_7355	10	75886168	75886254	-	testis
Peak_7356	10	75886471	75886650	+	testis
Peak_7357	10	75886895	75886944	+	brain
Peak_7361	10	76064171	76064363	+	kidney-3
Peak_7363	10	76072874	76073020	+	kidney-4
Peak_7365	10	76081348	76081484	+	testis
Peak_7374	10	76225915	76225931	+	testis
Peak_7379	10	76282169	76282351	+	liver
Peak_7386	10	76338282	76338300	+	thymus-1
Peak_7388	10	76357428	76357475	+	brain
Peak_7391	10	76369297	76369317	+	pre-stomach
Peak_7392	10	76370051	76370076	+	pre-stomach
Peak_7398	10	76458898	76458912	+	adipose-1
Peak_7399	10	76542883	76542897	-	testis
Peak_7400	10	76544888	76544926	-	testis
Peak_7401	10	76546326	76546536	+	pre-stomach
Peak_7403	10	76574679	76574686	+	intestines
Peak_7407	10	76612119	76612261	+	intestines
Peak_7412	10	76648123	76648339	-	brain
Peak_7413	10	76648243	76648359	+	testis
Peak_7414	10	76648500	76648509	-	thymus-1
Peak_7417	10	76649307	76649322	+	thymus-1
Peak_7419	10	76649792	76649937	+	kidney-3
Peak_7422	10	76669793	76669854	+	testis
Peak_7427	10	76681243	76681257	+	skin
Peak_7432	10	76838518	76838601	+	kidney-3
Peak_7438	10	77019089	77019237	-	esophagus-muscle
Peak_7439	10	77047996	77048140	+	testis
Peak_7441	10	77076692	77076700	-	brain
Peak_7442	10	77078370	77078397	-	brain
Peak_7444	10	77096417	77096614	-	brain
Peak_7446	10	77105923	77105924	+	kidney-1
Peak_7453	10	77203692	77203705	-	esophagus-muscle
Peak_7457	10	77225452	77225487	-	heart
Peak_7458	10	77226051	77226107	-	testis
Peak_7459	10	77226271	77226390	-	esophagus-heart-muscle
Peak_7475	10	77508720	77509034	+	testis
Peak_7477	10	77510109	77510123	+	thymus-1
Peak_7480	10	77582506	77582521	+	testis
Peak_7505	10	78535552	78535582	+	testis
Peak_7506	10	78537614	78537670	+	testis
Peak_7518	10	78991049	78991055	+	skin
Peak_7523	10	79158121	79158140	+	kidney-4
Peak_7528	10	79255088	79255315	-	brain
Peak_7530	10	79255608	79255705	-	testis
Peak_7537	10	79360920	79360963	-	ileum-2
Peak_7539	10	79387899	79387924	-	testis
Peak_7540	10	79388180	79388195	-	testis
Peak_7541	10	79407519	79407597	+	intestines
Peak_7542	10	79408015	79408277	+	brain
Peak_7543	10	79450706	79450707	+	brain
Peak_7544	10	79454295	79454309	+	thymus-1
Peak_7546	10	79474626	79474746	-	testis
Peak_7547	10	79474740	79474910	+	testis
Peak_7548	10	79499775	79499926	+	testis
Peak_7550	10	79500292	79500330	+	brain
Peak_7552	10	79552116	79552178	-	testis
Peak_7553	10	79552982	79553321	-	testis
Peak_7571	10	79956619	79956623	+	kidney-4
Peak_7573	10	79980472	79980494	+	liver
Peak_7584	10	80133666	80133686	+	intestines
Peak_7604	10	80617994	80618009	-	testis
Peak_7613	10	80623119	80623187	-	liver
Peak_7636	10	80842520	80842534	-	testis
Peak_7648	10	81045292	81045400	+	testis
Peak_7654	10	81181583	81181584	-	testis
Peak_7655	10	81184871	81185095	-	testis
Peak_7656	10	81185316	81185348	-	testis
Peak_7662	10	81315760	81315791	-	cerebellum-3
Peak_7663	10	81344776	81344894	+	intestines
Peak_7674	10	81437101	81437108	+	testis
Peak_7679	10	81495772	81495968	+	testis
Peak_7681	10	81496567	81496582	+	testis
Peak_7687	10	81526474	81526498	-	liver
Peak_7688	10	81526707	81526727	-	liver
Peak_7689	10	81526908	81526939	-	liver
Peak_7690	10	81541772	81541795	-	liver
Peak_7694	10	81635774	81635794	+	testis
Peak_7717	10	82020607	82020668	+	testis
Peak_7718	10	82046769	82046893	+	testis
Peak_7719	10	82119062	82119080	-	testis
Peak_7720	10	82140638	82140734	+	testis
Peak_7742	10	82691593	82691616	+	testis
Peak_7746	10	82754365	82754432	+	abomasum
Peak_7754	10	82910898	82910950	+	kidney-4
Peak_7761	10	83084525	83084567	+	ovary
Peak_7768	10	83237951	83238018	+	brain
Peak_7769	10	83258735	83258750	+	lung
Peak_7771	10	83455950	83456056	+	brain cortex-2
Peak_7787	10	84035658	84035722	+	pre-stomach
Peak_7805	10	84446540	84446667	+	testis
Peak_7807	10	84487682	84487698	-	testis
Peak_7812	10	84531161	84531387	-	testis
Peak_7816	10	84561694	84561739	+	testis
Peak_7819	10	84586637	84586655	+	brain cortex-1
Peak_7820	10	84586844	84586867	+	adipose-1
Peak_7821	10	84588964	84588973	+	testis
Peak_7831	10	84619546	84619933	+	testis
Peak_7837	10	84642961	84642973	+	pre-stomach
Peak_7839	10	84702174	84702249	+	kidney-3
Peak_7840	10	84702429	84702460	+	ileum-2
Peak_7841	10	84703344	84703418	+	pre-stomach
Peak_7844	10	84740403	84740523	-	testis
Peak_7854	10	84859456	84859465	-	testis
Peak_7859	10	84911042	84911076	-	testis
Peak_7861	10	84967994	84968005	-	testis
Peak_7868	10	85077934	85077948	+	testis
Peak_7871	10	85122011	85122027	-	cerebellum-3
Peak_7875	10	85127774	85127929	-	testis
Peak_7880	10	85145650	85145663	-	trachea
Peak_7895	10	85258093	85258101	+	liver
Peak_7896	10	85277669	85277722	+	kidney-3
Peak_7897	10	85277913	85277983	+	intestines
Peak_7903	10	85333911	85334005	+	liver
Peak_7911	10	85364645	85364665	-	pre-stomach
Peak_7917	10	85383712	85383713	-	colon
Peak_7918	10	85384174	85384528	-	testis
Peak_7921	10	85400751	85400788	+	testis
Peak_7922	10	85447578	85447882	-	kidney-4
Peak_7923	10	85448118	85448264	+	testis
Peak_7929	10	85646955	85647059	-	liver
Peak_7932	10	85783937	85783982	+	brain
Peak_7939	10	85954643	85954654	-	liver
Peak_7942	10	85988417	85988507	+	testis
Peak_7944	10	86019620	86019768	+	brain
Peak_7950	10	86053222	86053249	+	testis
Peak_7951	10	86053783	86053796	+	testis
Peak_7958	10	86138221	86138342	+	esophagus-heart-muscle
Peak_7959	10	86138989	86139068	-	brain cortex-2
Peak_7962	10	86158971	86158977	-	brain
Peak_7963	10	86174102	86174217	-	brain
Peak_7966	10	86259450	86259548	+	testis
Peak_7967	10	86301744	86301873	-	testis
Peak_7972	10	86318472	86318579	+	kidney-4
Peak_7983	10	86407471	86407551	-	testis
Peak_7994	10	86610151	86610263	+	intestines
Peak_7996	10	86610983	86611064	+	brain
Peak_8003	10	86714118	86714207	+	intestines
Peak_8005	10	86758034	86758080	+	testis
Peak_8010	10	86916680	86916767	-	brain
Peak_8011	10	86916797	86916919	+	testis
Peak_8012	10	86917026	86917063	-	brain
Peak_8013	10	86917098	86917193	+	brain
Peak_8015	10	86978358	86978384	+	intestines
Peak_8016	10	87010462	87010487	+	brain
Peak_8021	10	87261020	87261052	+	testis
Peak_8026	10	87267942	87268006	+	testis
Peak_8027	10	87270907	87270915	+	lung
Peak_8028	10	87271189	87271287	-	esophagus-heart-muscle
Peak_8032	10	87496026	87496133	+	kidney-4
Peak_8038	10	87697680	87697759	+	kidney-4
Peak_8041	10	88017185	88017269	+	brain
Peak_8046	10	88045451	88045472	-	liver
Peak_8048	10	88065256	88065348	-	testis
Peak_8049	10	88079959	88080025	-	testis
Peak_8050	10	88080057	88080128	+	testis
Peak_8051	10	88110946	88110968	-	testis
Peak_8054	10	88172109	88172111	+	cerebellum-3
Peak_8073	10	88298496	88298774	+	brain
Peak_8075	10	88303880	88303908	+	brain
Peak_8083	10	88340018	88340243	-	brain
Peak_8089	10	88499232	88499233	-	testis
Peak_8091	10	88521341	88521434	-	brain
Peak_8094	10	88522180	88522204	+	testis
Peak_8096	10	88528730	88528942	+	liver
Peak_8099	10	88580414	88580438	+	abomasum
Peak_8100	10	88580717	88580778	+	brain
Peak_8101	10	88581352	88581431	-	brain
Peak_8104	10	88648091	88648104	+	testis
Peak_8106	10	88648507	88648620	+	brain
Peak_8119	10	88846228	88846244	+	testis
Peak_8120	10	88846472	88846528	-	testis
Peak_8121	10	88846528	88846608	+	esophagus-heart-muscle
Peak_8122	10	88888780	88888901	-	intestines
Peak_8141	10	90494083	90494180	-	cerebellum-3
Peak_8154	10	91099620	91099629	+	brain
Peak_8160	10	91505226	91505260	-	esophagus
Peak_8166	10	91846683	91846710	-	ileum-2
Peak_8171	10	92255436	92255533	-	testis
Peak_8173	10	92282176	92282307	+	testis
Peak_8174	10	92487924	92487939	-	testis
Peak_8176	10	92509804	92509811	-	brain
Peak_8177	10	92511403	92511541	-	testis
Peak_8187	10	92758930	92758946	-	testis
Peak_8194	10	93169473	93169512	+	kidney-3
Peak_8195	10	93190282	93190310	+	testis
Peak_8197	10	94274799	94274829	-	testis
Peak_8206	10	97154920	97154960	-	testis
Peak_8223	10	99742317	99742394	+	intestines
Peak_8231	10	100070183	100070285	-	cerebellum-3
Peak_8235	10	100143328	100143341	+	esophagus-muscle
Peak_8239	10	100176540	100176557	-	testis
Peak_8241	10	100201162	100201177	-	esophagus-heart-muscle
Peak_8244	10	100243713	100243736	-	testis
Peak_8247	10	100258118	100258220	+	testis
Peak_8249	10	100258587	100258632	+	testis
Peak_8260	10	100415617	100415627	-	testis
Peak_8261	10	100437168	100437205	-	testis
Peak_8264	10	100461010	100461057	-	ileum-2
Peak_8265	10	100503014	100503071	+	brain
Peak_8266	10	100515449	100515521	+	testis
Peak_8271	10	100834357	100834383	-	liver
Peak_8304	10	101095973	101095990	-	pre-stomach
Peak_8306	10	101106077	101106201	-	cerebellum-3
Peak_8316	10	101282268	101282405	-	liver
Peak_8325	10	101586860	101586877	-	thymus-1
Peak_8326	10	101631964	101631990	-	testis
Peak_8327	10	101634565	101634652	-	testis
Peak_8328	10	101634942	101634966	+	testis
Peak_8330	10	101636051	101636133	+	intestines
Peak_8337	10	101862173	101862255	+	testis
Peak_8343	10	101992081	101992281	+	testis
Peak_8344	10	101993013	101993028	-	cerebellum-3
Peak_8345	10	102005568	102005718	+	brain
Peak_8347	10	102007068	102007076	+	adipose-1
Peak_8351	10	102008760	102008792	+	testis
Peak_8352	10	102009131	102009159	+	brain cortex-2
Peak_8353	10	102009318	102009384	+	testis
Peak_8354	10	102012121	102012130	+	testis
Peak_8386	10	102643648	102643810	-	liver
Peak_8394	10	102811424	102811437	+	thymus-1
Peak_8400	10	102869180	102869804	+	testis
Peak_8405	10	102954811	102954995	+	esophagus-heart-muscle
Peak_8408	10	103051041	103051154	-	testis
Peak_8410	10	103062361	103062375	-	thymus-1
Peak_8413	10	103095471	103095606	+	intestines
Peak_8424	10	103154181	103154240	-	testis
Peak_8428	11	190333	190427	-	brain
Peak_8434	11	361701	361895	-	liver
Peak_8437	11	516485	516623	-	brain
Peak_8438	11	516726	516760	+	liver
Peak_8439	11	526202	526253	+	testis
Peak_8446	11	581565	581576	+	skin
Peak_8451	11	974043	974057	+	esophagus-muscle
Peak_8453	11	1232557	1232573	-	testis
Peak_8457	11	1234913	1234971	-	intestines
Peak_8463	11	1481919	1481934	-	thymus-1
Peak_8465	11	1559951	1559976	-	intestines
Peak_8468	11	1674987	1675040	-	kidney-3
Peak_8471	11	1703087	1703116	+	lung
Peak_8472	11	1753001	1753127	+	pre-stomach
Peak_8473	11	1774692	1774931	+	pre-stomach
Peak_8478	11	1848519	1848669	+	pre-stomach
Peak_8482	11	1869445	1869461	+	testis
Peak_8483	11	1869659	1869684	+	testis
Peak_8484	11	1903862	1903884	+	testis
Peak_8487	11	1945583	1945850	-	testis
Peak_8489	11	1970396	1970478	-	brain cortex-1
Peak_8496	11	2042241	2042336	+	pre-stomach
Peak_8498	11	2153752	2153872	+	liver
Peak_8502	11	2176587	2176610	-	testis
Peak_8510	11	2319407	2319422	-	liver
Peak_8513	11	2337526	2337569	+	testis
Peak_8514	11	2338003	2338061	-	testis
Peak_8515	11	2338124	2338257	+	cerebellulm-2
Peak_8518	11	2367459	2367626	+	brain
Peak_8519	11	2372043	2372044	+	brain
Peak_8521	11	2381773	2381786	-	testis
Peak_8523	11	2382362	2382375	-	testis
Peak_8525	11	2387506	2387517	-	testis
Peak_8527	11	2400313	2400474	-	testis
Peak_8529	11	2425551	2425670	+	intestines
Peak_8534	11	2433779	2433883	+	intestines
Peak_8540	11	2449301	2449316	+	thymus-1
Peak_8544	11	2456098	2456220	+	thymus-1
Peak_8549	11	2557588	2557671	+	intestines
Peak_8551	11	2609815	2609830	-	liver
Peak_8556	11	2624709	2624812	-	testis
Peak_8560	11	2702807	2702821	-	testis
Peak_8577	11	2805629	2805680	-	esophagus-heart-muscle
Peak_8583	11	2827022	2827040	-	pre-stomach
Peak_8588	11	2938280	2938428	-	testis
Peak_8591	11	2949856	2949875	-	testis
Peak_8594	11	2974297	2974384	+	testis
Peak_8623	11	3587692	3587777	+	testis
Peak_8624	11	3650977	3651050	+	brain
Peak_8625	11	3652207	3652219	+	cerebellum-3
Peak_8627	11	3669237	3669292	+	intestines
Peak_8628	11	3684675	3684686	+	ileum-2
Peak_8651	11	3960586	3960680	-	testis
Peak_8653	11	4040540	4040553	-	thymus-1
Peak_8656	11	4211475	4211536	-	testis
Peak_8662	11	4311177	4311309	+	testis
Peak_8663	11	4336461	4336490	+	testis
Peak_8664	11	4336791	4336898	-	intestines
Peak_8670	11	4454692	4454898	-	testis
Peak_8678	11	4537437	4537449	-	testis
Peak_8680	11	4616155	4616257	-	testis
Peak_8684	11	4669873	4669912	-	testis
Peak_8685	11	4670299	4670308	-	thymus-1
Peak_8755	11	5501687	5501705	-	brain
Peak_8758	11	5568007	5568044	+	brain
Peak_8759	11	5581222	5581323	+	esophagus-heart-muscle
Peak_8762	11	5969618	5969636	+	brain
Peak_8773	11	6119307	6119387	-	intestines
Peak_8775	11	6164462	6164657	+	testis
Peak_8781	11	6264507	6264576	-	brain
Peak_8793	11	6613997	6614006	+	brain cortex-1
Peak_8798	11	6690092	6690114	+	pre-stomach
Peak_8805	11	6819453	6819474	+	liver
Peak_8811	11	6846287	6846471	+	liver
Peak_8821	11	7031044	7031242	+	pre-stomach
Peak_8832	11	7203291	7203339	+	intestines
Peak_8833	11	7241235	7241336	+	abomasum
Peak_8834	11	7241520	7241758	+	abomasum
Peak_8836	11	7285768	7285783	+	testis
Peak_8838	11	7335488	7335663	+	pre-stomach
Peak_8839	11	7392324	7392406	+	pre-stomach
Peak_8842	11	7442768	7442917	-	intestines
Peak_8843	11	7442956	7443016	+	testis
Peak_8845	11	7474320	7474349	+	abomasum
Peak_8864	11	9015768	9015844	-	kidney-2
Peak_8870	11	9113909	9114025	+	testis
Peak_8873	11	9170119	9170184	+	cerebellum-3
Peak_8881	11	9256645	9256745	+	testis
Peak_8894	11	9610185	9610188	+	testis
Peak_8896	11	9717867	9717968	-	testis
Peak_8898	11	9810511	9810594	-	testis
Peak_8900	11	9989537	9989613	+	testis
Peak_8904	11	10088515	10088584	-	intestines
Peak_8906	11	10089104	10089112	-	cerebellum-3
Peak_8910	11	10110333	10110647	+	liver
Peak_8916	11	10130530	10130608	+	testis
Peak_8917	11	10130845	10130911	+	testis
Peak_8918	11	10132051	10132068	+	testis
Peak_8919	11	10140082	10140097	-	adipose-1
Peak_8922	11	10151728	10151844	-	reticulum
Peak_8927	11	10159178	10159255	+	testis
Peak_8930	11	10169312	10169325	-	thymus-1
Peak_8931	11	10170287	10170432	-	brain
Peak_8932	11	10170551	10170687	+	brain
Peak_8934	11	10173654	10173756	-	liver
Peak_8936	11	10187362	10187444	+	pre-stomach
Peak_8940	11	10205615	10205735	-	testis
Peak_8941	11	10205793	10205861	+	testis
Peak_8943	11	10212259	10212344	+	intestines
Peak_8944	11	10218485	10218505	+	intestines
Peak_8949	11	10249236	10249316	+	brain
Peak_8952	11	10257555	10257578	+	testis
Peak_8955	11	10262378	10262391	+	skin
Peak_8959	11	10337207	10337293	+	lung
Peak_8960	11	10337818	10337846	+	brain cortex-2
Peak_8965	11	10475408	10475548	+	intestines
Peak_9008	11	10848236	10848360	+	liver
Peak_9017	11	11007743	11007753	-	testis
Peak_9019	11	11079795	11080007	-	testis
Peak_9023	11	11214737	11214770	+	testis
Peak_9024	11	11215447	11215487	-	testis
Peak_9025	11	11215623	11215876	+	testis
Peak_9026	11	11220758	11220770	-	testis
Peak_9035	11	11369323	11369335	+	testis
Peak_9036	11	11371552	11371671	+	brain
Peak_9038	11	11440321	11440355	+	pre-stomach
Peak_9048	11	11782009	11782013	+	esophagus-muscle
Peak_9065	11	12375034	12375200	+	thymus-1
Peak_9068	11	12376900	12377072	+	testis
Peak_9073	11	12394970	12395009	+	testis
Peak_9079	11	12921272	12921275	-	esophagus-muscle
Peak_9087	11	13123637	13123650	-	esophagus-muscle
Peak_9089	11	13159252	13159289	-	brain cortex-2
Peak_9093	11	13173181	13173188	-	lung
Peak_9100	11	13245910	13245924	-	testis
Peak_9102	11	13246730	13246875	-	brain
Peak_9105	11	13347772	13347887	+	esophagus-heart-muscle
Peak_9106	11	13348353	13348528	+	testis
Peak_9107	11	13397649	13397661	-	liver
Peak_9112	11	13428935	13429031	+	testis
Peak_9113	11	13454367	13454385	-	kidney-4
Peak_9114	11	13455577	13455592	-	kidney-3
Peak_9115	11	13455882	13455907	-	pre-stomach
Peak_9116	11	13459260	13459261	-	kidney-3
Peak_9122	11	13572454	13572470	+	liver
Peak_9125	11	13742909	13742933	+	brain cortex-2
Peak_9130	11	14150121	14150231	+	testis
Peak_9132	11	14153797	14153812	+	testis
Peak_9133	11	14165134	14165149	-	liver
Peak_9148	11	14224516	14224568	-	liver
Peak_9150	11	14269834	14269904	-	liver
Peak_9151	11	14370488	14370496	-	intestines
Peak_9158	11	14655826	14655946	-	testis
Peak_9159	11	14668554	14668565	-	kidney-3
Peak_9164	11	14687569	14687588	-	testis
Peak_9165	11	14696186	14696223	-	cerebellum-1
Peak_9174	11	14763536	14763618	+	testis
Peak_9176	11	14832059	14832074	+	testis
Peak_9177	11	14865074	14865202	-	liver
Peak_9185	11	14961027	14961239	+	intestines
Peak_9197	11	15080619	15080631	+	testis
Peak_9209	11	15188419	15188513	+	testis
Peak_9212	11	15341768	15341783	+	kidney-4
Peak_9214	11	15389609	15389668	+	kidney-4
Peak_9216	11	15433744	15433780	+	thymus-1
Peak_9219	11	15473608	15473612	+	kidney-3
Peak_9236	11	15796289	15796303	+	thymus-1
Peak_9243	11	16007842	16007857	+	isthmus
Peak_9244	11	16032826	16032881	+	ileum-2
Peak_9247	11	16109503	16109583	+	testis
Peak_9248	11	16153834	16153978	-	testis
Peak_9261	11	18835759	18835786	+	kidney-4
Peak_9275	11	19388525	19388624	-	heart
Peak_9276	11	19409589	19409642	-	kidney-4
Peak_9277	11	19422299	19422314	-	heart
Peak_9278	11	19422765	19422777	-	heart
Peak_9279	11	19423395	19423587	-	skin
Peak_9284	11	19542032	19542097	-	thymus-1
Peak_9290	11	19581247	19581258	-	testis
Peak_9297	11	19630091	19630173	+	esophagus-heart-muscle
Peak_9308	11	19714069	19714070	-	ileum-1
Peak_9313	11	19764914	19765045	-	thymus-1
Peak_9314	11	19791947	19791962	+	brain cortex-2
Peak_9324	11	20279461	20279467	-	esophagus-heart-muscle
Peak_9327	11	20358608	20358843	+	liver
Peak_9329	11	20359062	20359074	+	liver
Peak_9330	11	20369865	20369880	+	testis
Peak_9343	11	20739378	20739391	-	brain
Peak_9351	11	20948017	20948183	-	testis
Peak_9353	11	21021085	21021312	+	intestines
Peak_9354	11	21044239	21044358	+	liver
Peak_9355	11	21049868	21050062	+	intestines
Peak_9358	11	21091273	21091310	-	testis
Peak_9359	11	21091517	21091605	-	testis
Peak_9360	11	21091605	21091655	+	testis
Peak_9362	11	21128645	21128730	+	testis
Peak_9364	11	21148380	21148404	-	thymus-1
Peak_9366	11	21205527	21205671	-	testis
Peak_9367	11	21205665	21205749	+	brain
Peak_9368	11	21218049	21218182	+	cerebellum-3
Peak_9373	11	21310133	21310142	-	testis
Peak_9394	11	21616859	21616872	-	skin
Peak_9406	11	21764806	21764834	+	adipose-2
Peak_9408	11	21962742	21962850	+	brain
Peak_9414	11	22059913	22059953	-	testis
Peak_9415	11	22080759	22080825	-	testis
Peak_9440	11	22601162	22601195	-	pre-stomach
Peak_9464	11	22787355	22787430	-	brain
Peak_9466	11	22788845	22788854	-	kidney-3
Peak_9489	11	24638793	24638920	+	pre-stomach
Peak_9494	11	24669533	24669548	+	pre-stomach
Peak_9504	11	24936931	24937008	+	testis
Peak_9505	11	24937198	24937221	+	testis
Peak_9506	11	24937523	24937548	+	testis
Peak_9511	11	25125553	25125625	-	liver
Peak_9533	11	25467268	25467280	-	thymus-1
Peak_9537	11	25490139	25490174	+	cerebellulm-2
Peak_9547	11	25509462	25509475	-	thymus-1
Peak_9567	11	26000294	26000395	+	testis
Peak_9572	11	26207370	26207447	-	esophagus-heart-muscle
Peak_9577	11	26359538	26359554	+	testis
Peak_9580	11	26368451	26368555	+	testis
Peak_9589	11	26426123	26426127	+	testis
Peak_9598	11	26668345	26668356	+	hypothalamus
Peak_9600	11	26701148	26701159	+	intestines
Peak_9607	11	26771202	26771313	-	testis
Peak_9608	11	26771498	26771514	-	brain
Peak_9620	11	27843650	27843714	+	brain
Peak_9630	11	28092764	28092792	+	esophagus-muscle
Peak_9632	11	28093767	28093780	+	brain
Peak_9668	11	28632841	28632852	+	brain
Peak_9672	11	28735435	28735459	+	liver
Peak_9694	11	28817945	28817958	+	lung
Peak_9710	11	29060368	29060489	-	testis
Peak_9714	11	29143389	29143438	+	testis
Peak_9727	11	29405128	29405201	+	intestines
Peak_9728	11	29405359	29405414	-	intestines
Peak_9734	11	29577405	29577479	-	testis
Peak_9735	11	29593573	29593654	-	testis
Peak_9737	11	29594183	29594380	-	brain
Peak_9738	11	29594569	29594636	-	testis
Peak_9742	11	29672016	29672018	-	brain
Peak_9746	11	29782631	29782802	+	pre-stomach
Peak_9750	11	29964134	29964206	-	cerebellum-3
Peak_9753	11	30106079	30106093	+	ileum-2
Peak_9757	11	30122761	30122813	+	testis
Peak_9772	11	30256127	30256226	-	testis
Peak_9777	11	30593849	30593893	+	kidney-3
Peak_9782	11	30690307	30690340	+	esophagus-muscle
Peak_9785	11	30751739	30751767	+	brain
Peak_9792	11	30916706	30916772	+	testis
Peak_9793	11	30931747	30931809	+	esophagus
Peak_9798	11	31450339	31450432	-	testis
Peak_9805	11	32766583	32766733	-	brain
Peak_9806	11	32766908	32767071	-	brain cortex-2
Peak_9812	11	33047415	33047433	-	testis
[truncated: 18,897 more rows]
